# Supplementary material for: Global-scale modeling of early factors and country-specific trajectories of COVID-19 incidence: a cross-sectional study of the first 6 months of the pandemic
Source: Springer Nature journal article supplement (doi:10.1186/s12889-022-14336-w), 2022-10-14

**Additional File 5:** Association of selected demographic, economic and meteorological variables with total COVID-19 cases in May 2020, as determined by univariate linear regression. For each plot, the X-axis shows the analysed variable and the Y-axis represents the logarithm of the country-level total COVID-19 cases per million people in May 2020. The regression equation and the associated R2 and p-value are also shown. The variables analysed are described as below:

| <b>Variable</b>            | <b>Description</b>                                                                                                                |
|----------------------------|-----------------------------------------------------------------------------------------------------------------------------------|
| D_Age_15_64y_2018          | Total population between the ages 15 to 64 as a percentage of the total population in 2018.                                       |
| D_Pop_over65_2018          | Population ages 65 and above as a percentage of the total population in 2018.                                                     |
| D_Popden2018               | Population density in 2018.                                                                                                       |
| E_Employ_agri_%totemp_2018 | Employment in agriculture, male (% total male employment)                                                                         |
| E_Employ_ind_%totemp_2018  | Employment in agriculture, male (% total male employment)                                                                         |
| E_Employ_serv_%totemp_2018 | Employment in agriculture, male (% total male employment)                                                                         |
| E_Total_visitors2018       | Number of total registered visitors in 2018.                                                                                      |
| E_Urban_pct2018            | Percentage of urban living population.                                                                                            |
| G_Land_area_sqkm           | Land area in square kilometers.                                                                                                   |
| G_Rain_mm_Apr2016          | Average rainfall in millimeters in April 2016                                                                                     |
| G_Rain_mm_Dec2016          | Average rainfall in millimeters in December 2016                                                                                  |
| G_Rain_mm_Feb2016          | Average rainfall in millimeters in February 2016                                                                                  |
| G_Rain_mm_Jan2016          | Average rainfall in millimeters in January 2016                                                                                   |
| G_Rain_mm_Mar2016          | Average rainfall in millimeters in March 2016                                                                                     |
| G_Temp_C_Apr2016           | Average temperature in degrees Celsius in April 2016                                                                              |
| G_Temp_C_Feb2016           | Average temperature in degrees Celsius in February 2016                                                                           |
| G_Temp_C_Jan2016           | Average temperature in degrees Celsius in January 2016                                                                            |
| G_Temp_C_Mar2016           | Average temperature in degrees Celsius in March 2016                                                                              |
| H_covid_duration_9Apr      | A calculated estimate between April 9, 2020 and the first day of reported COVID-19 case(s) in a country                           |
| H_DALY_CVD_70yrs           | Disability Adjusted Life Year estimates calculated per country by cardiovascular disease incidence for people aged 70 yrs or more |
| H_DALY_CVD_all             | Disability Adjusted Life Year estimates calculated per country by cardiovascular disease incidence across all age groups          |
| H_DALY_resp_70yrs          | Disability Adjusted Life Year estimates calculated per country by respiratory symptoms for people aged 70 yrs or more             |
| H_DALY_resp_all            | Disability Adjusted Life Year estimates calculated per country by respiratory symptoms for all age groups                         |
| H_Diabetes2019             | Diabetes prevalence refers to the percentage of people ages 20-79 who have type 1 or type 2 diabetes.                             |
| H_Total_COVID_cases        | Number of total reported COVID-19 cases per day per country                                                                       |

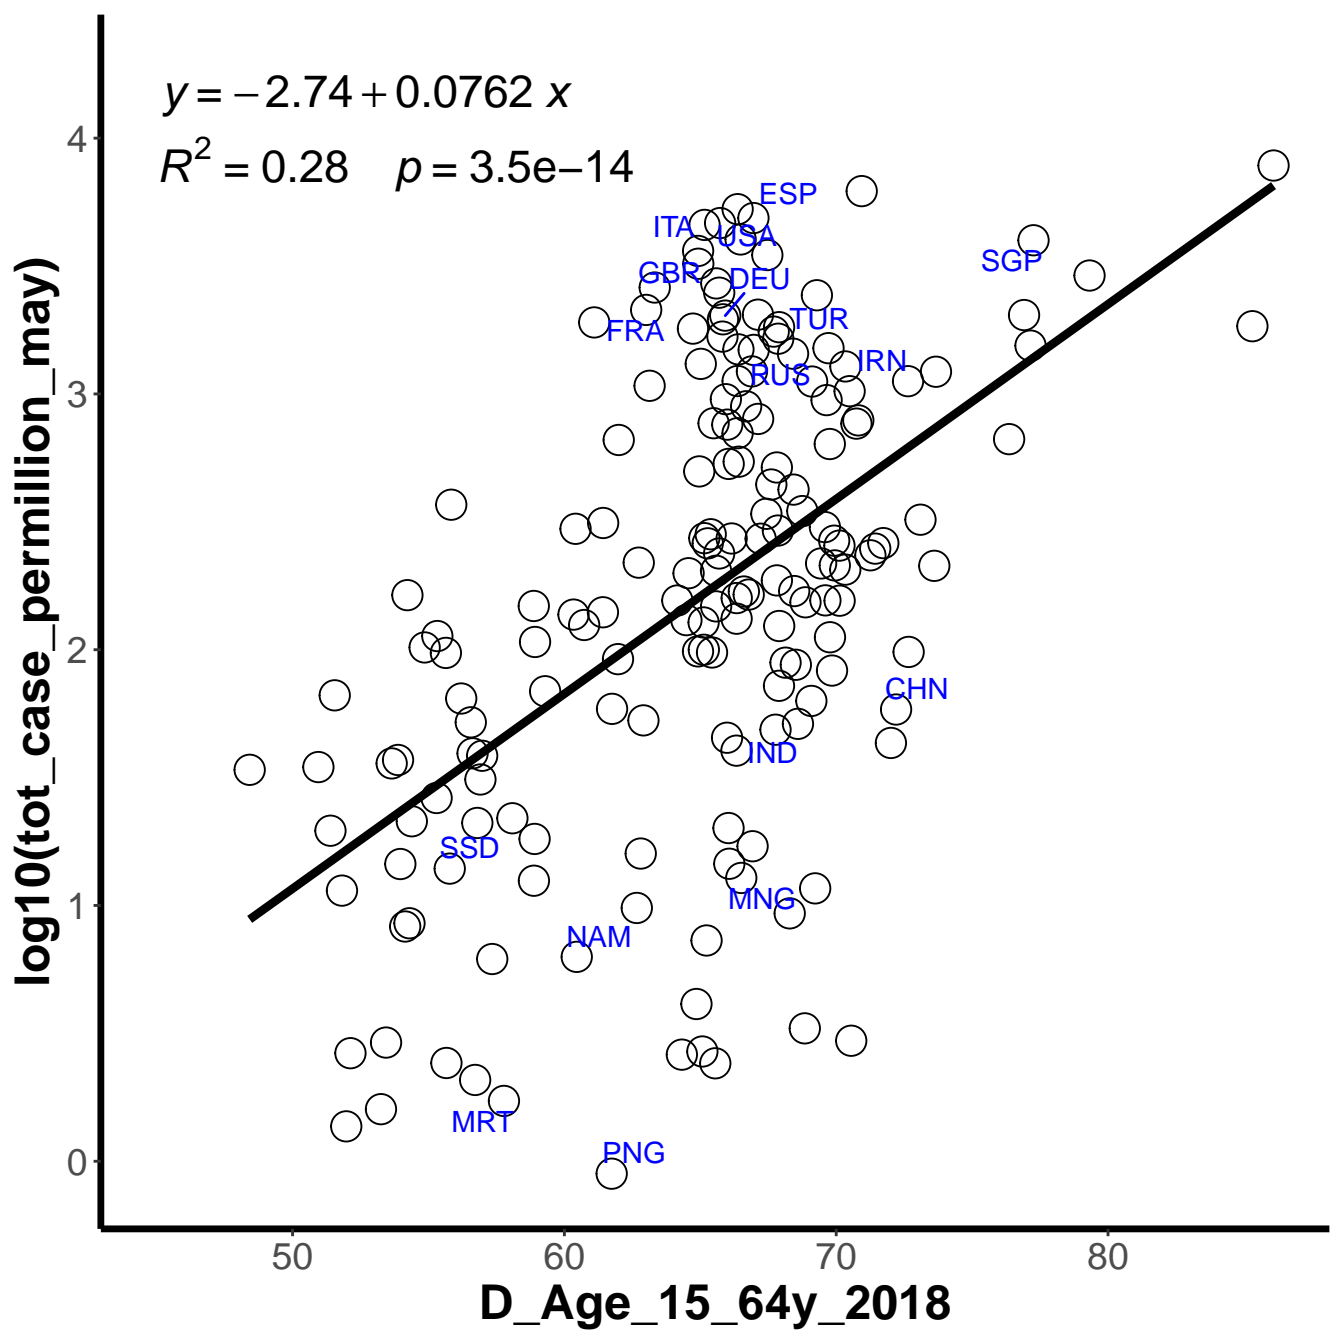

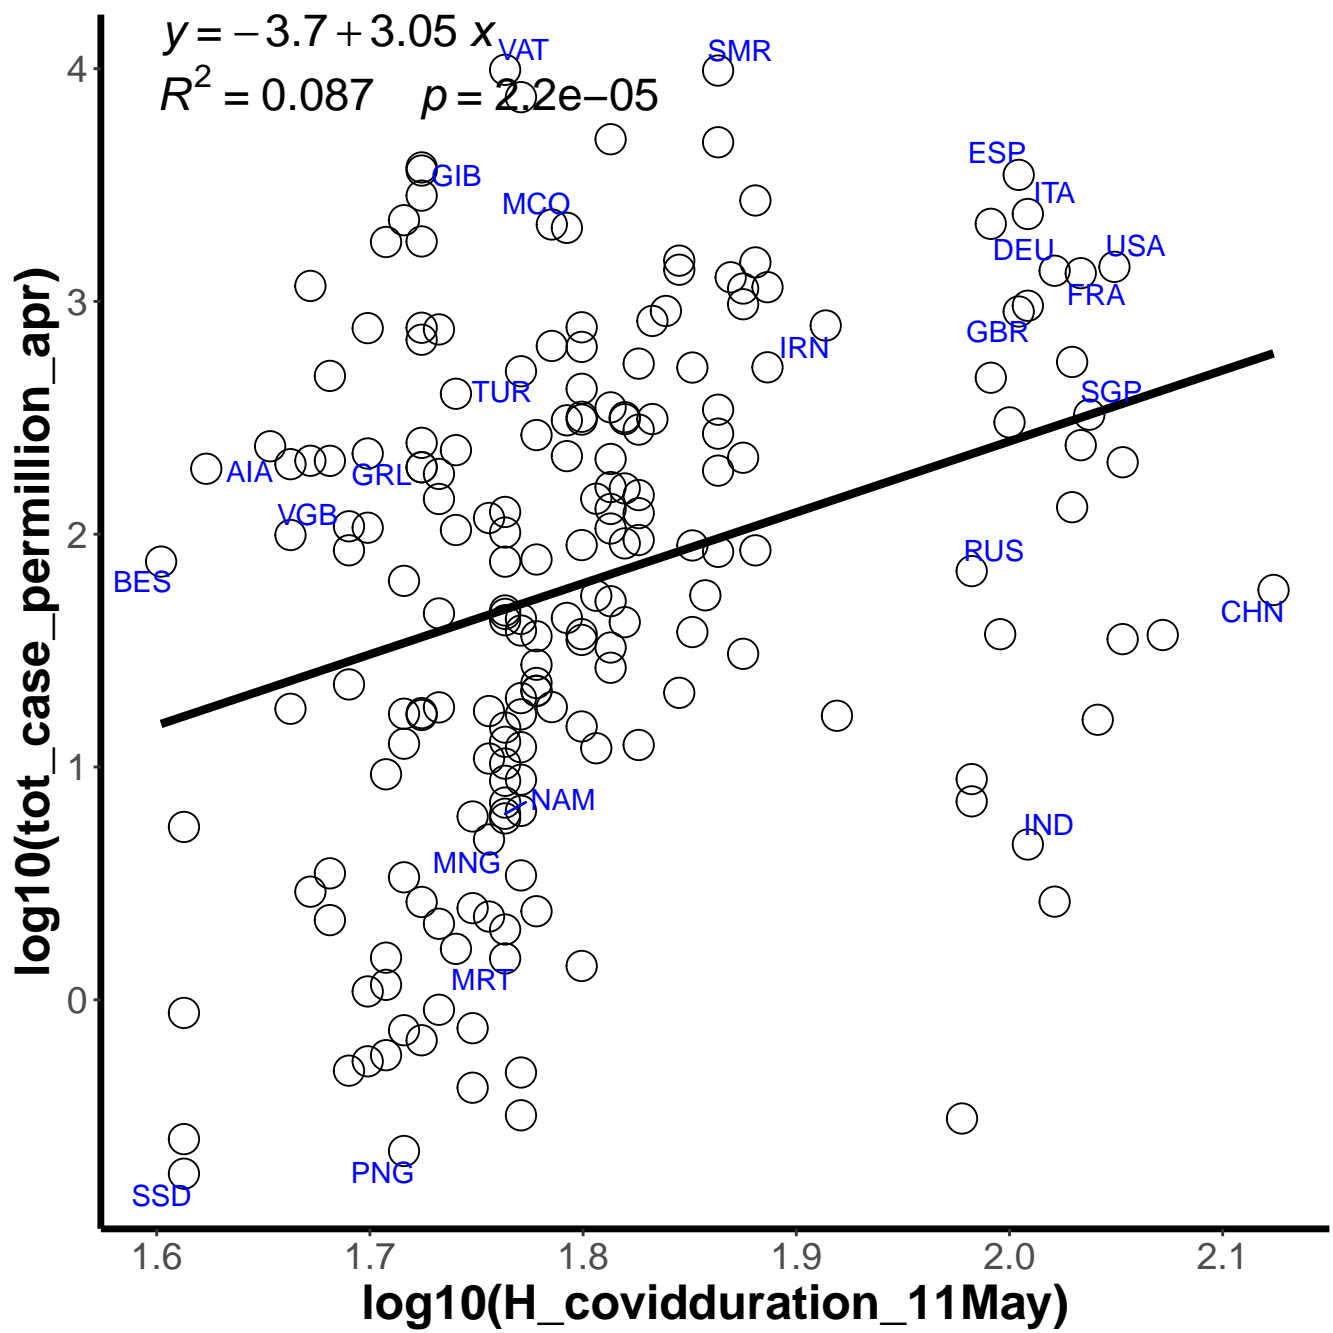

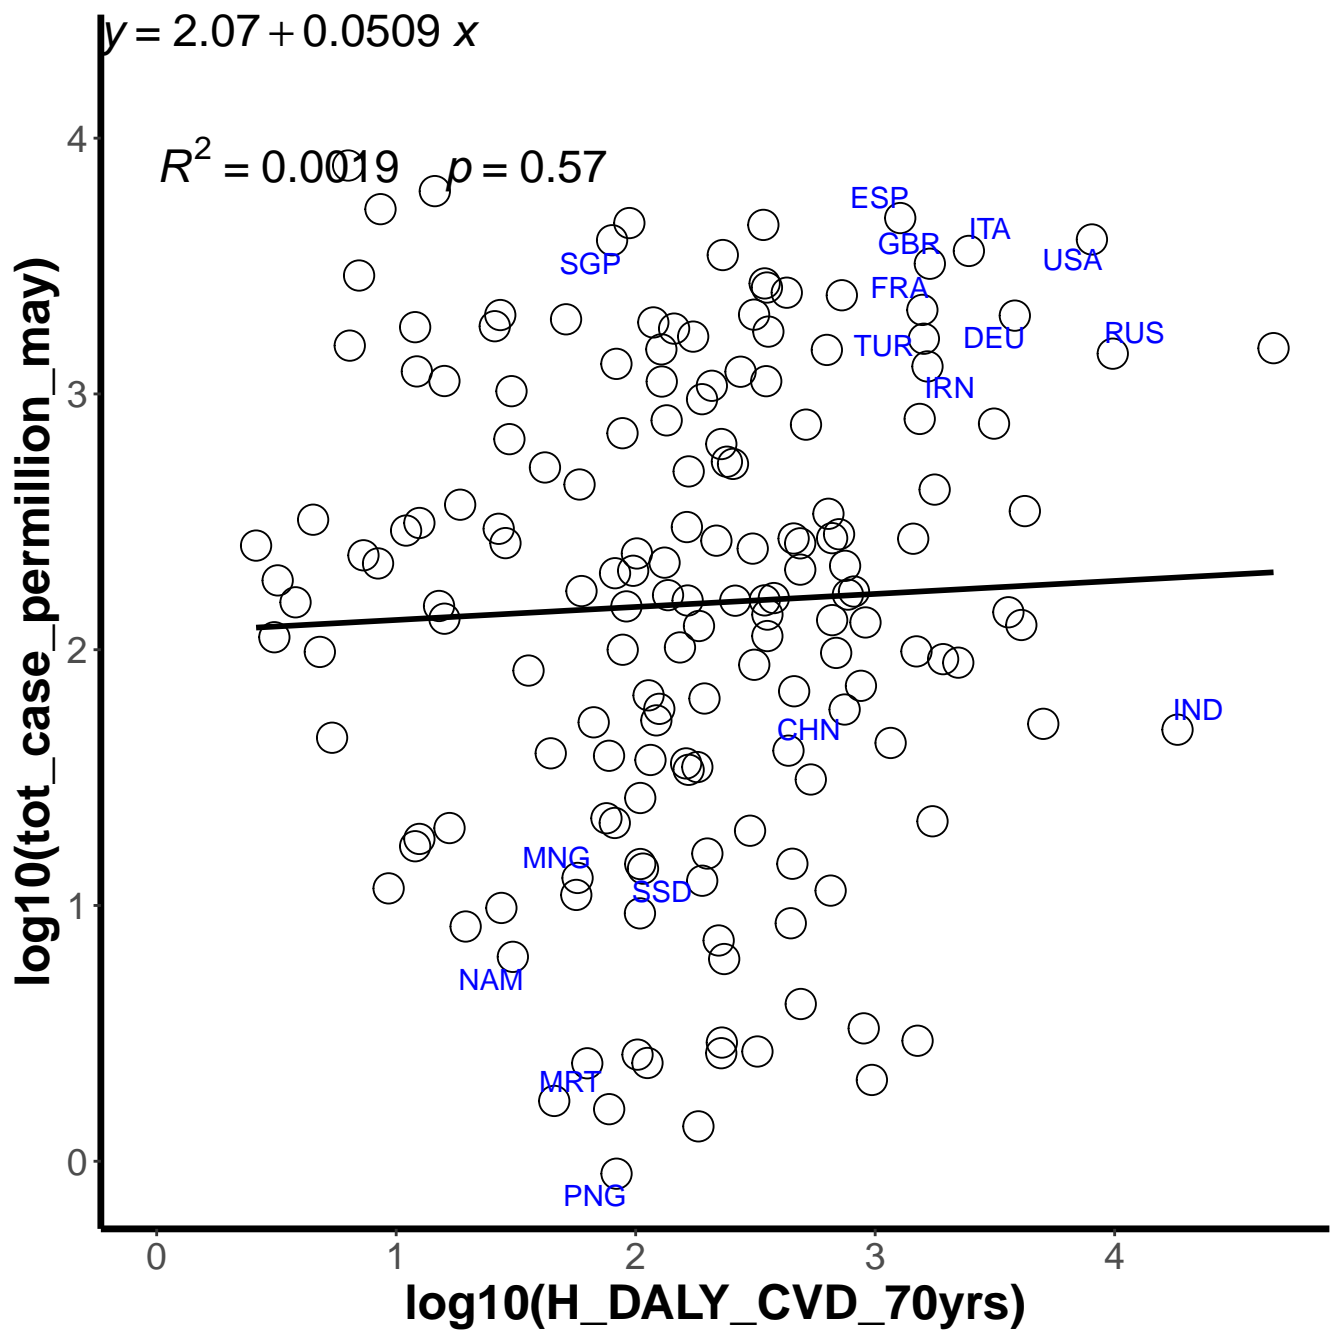

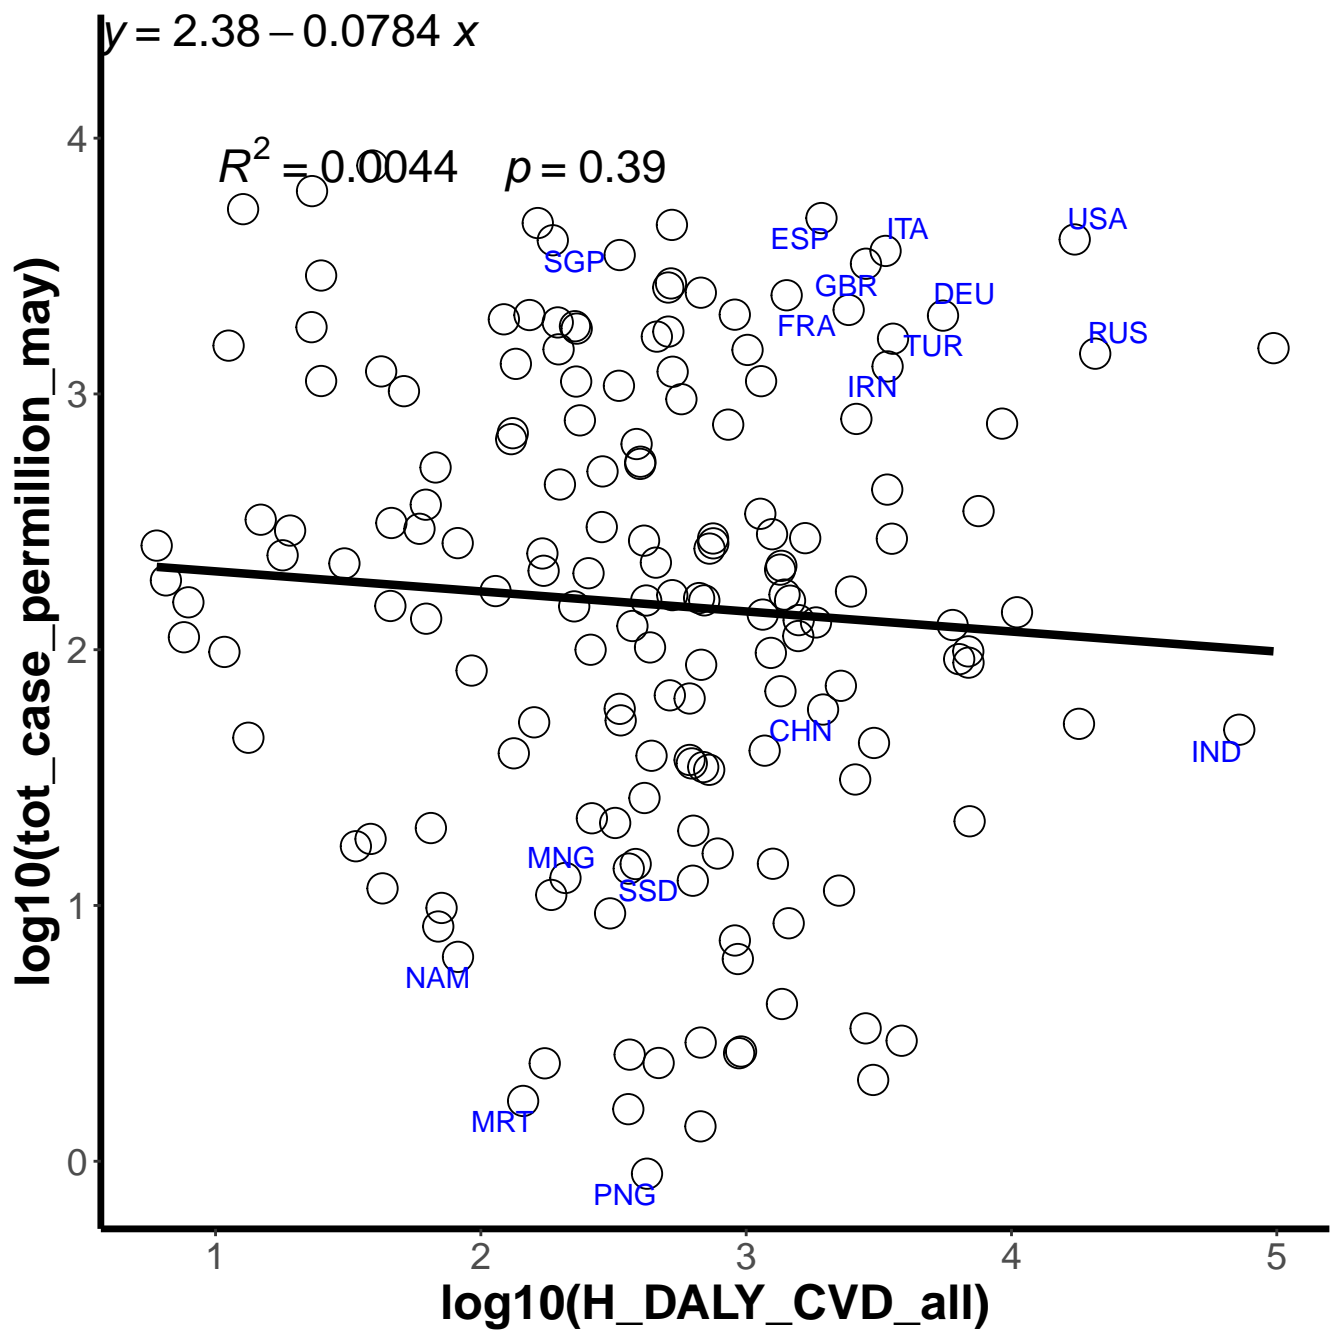

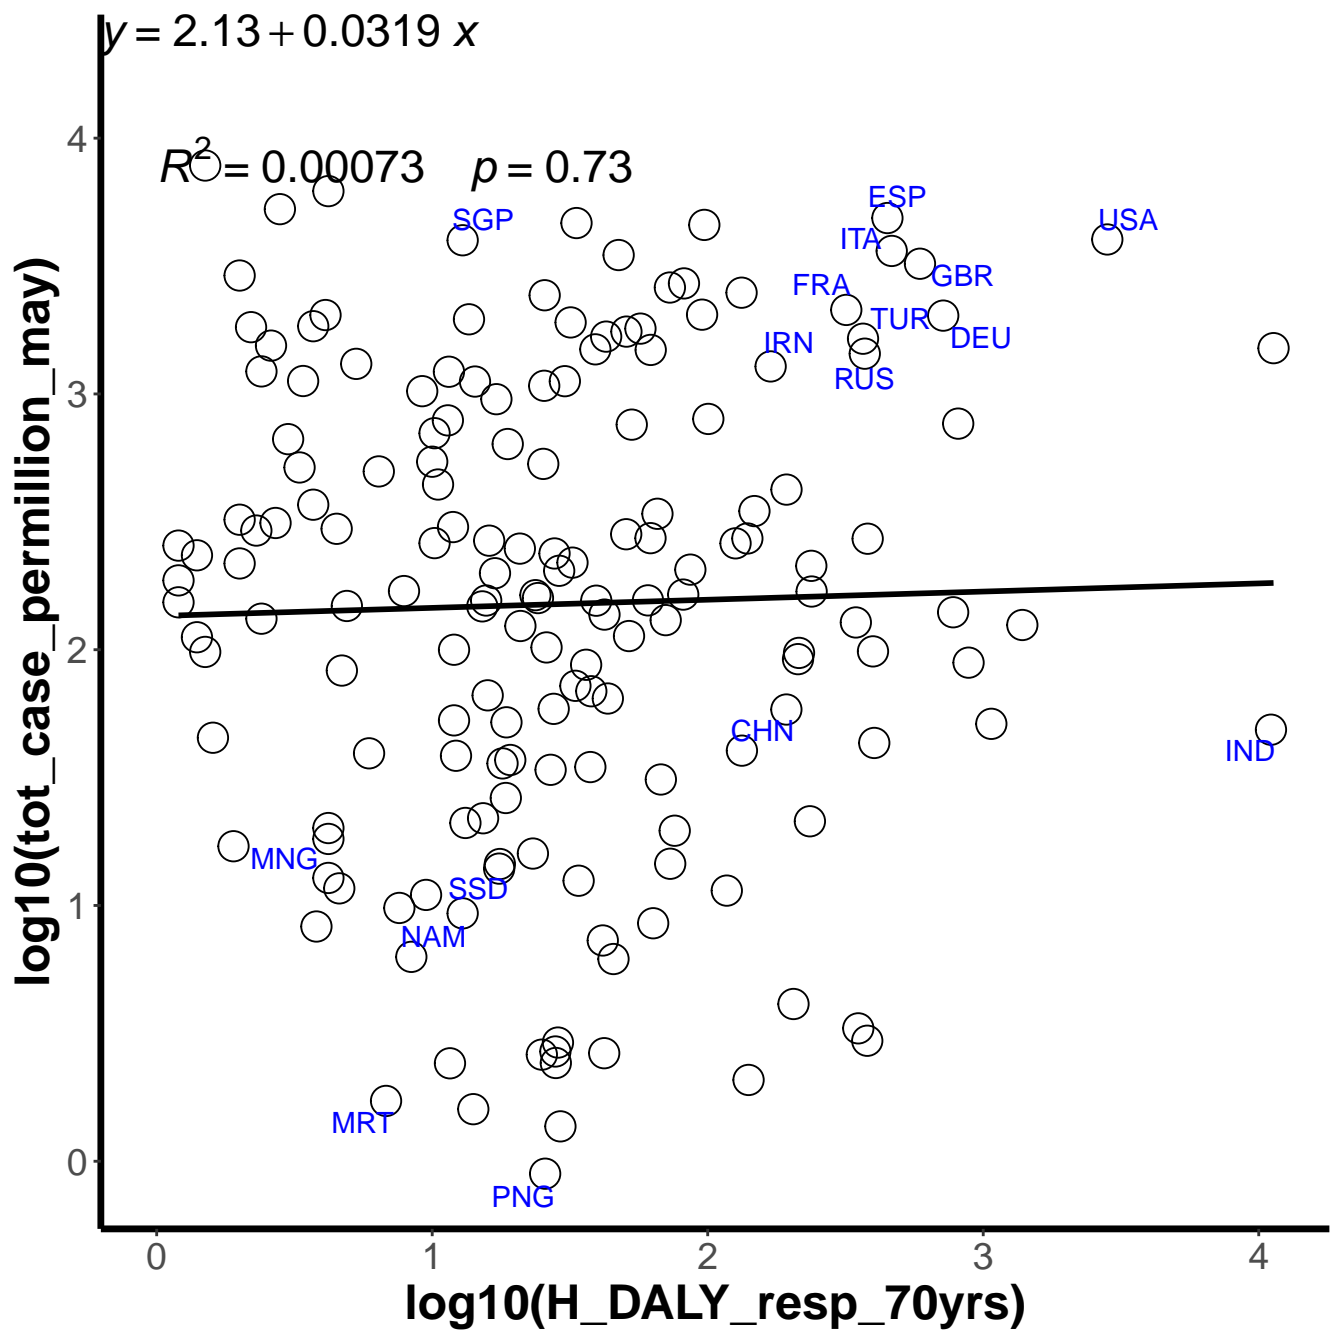

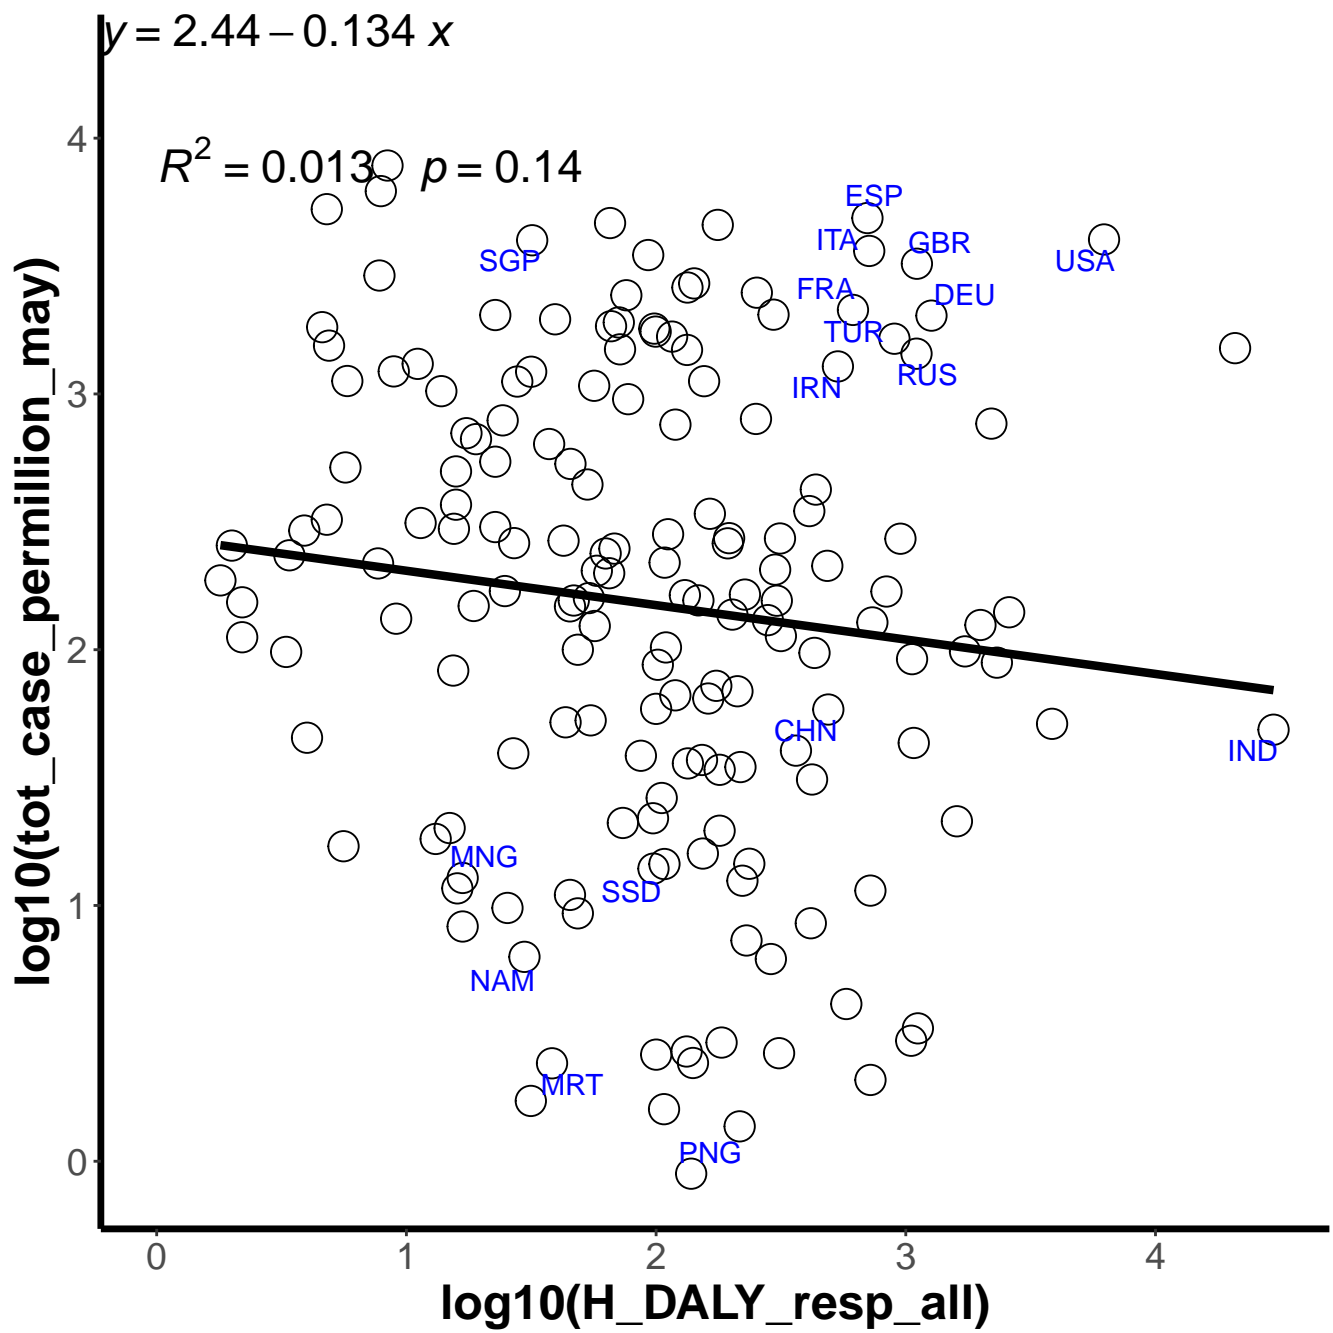

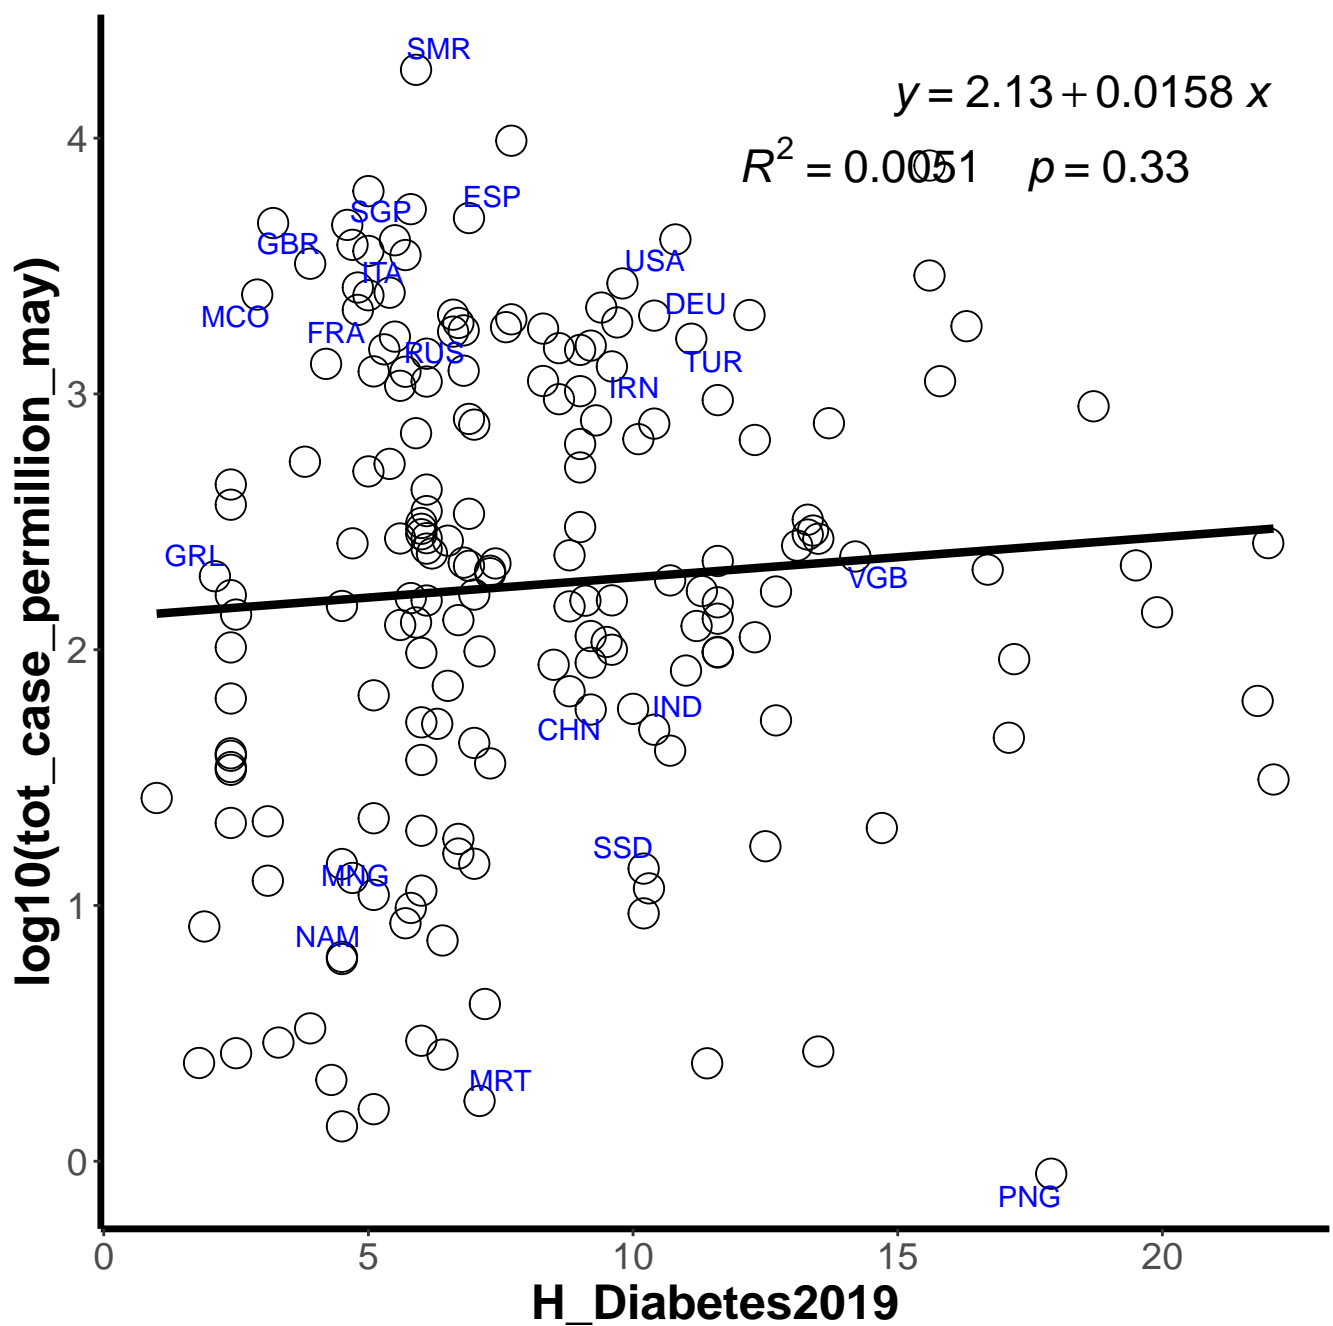



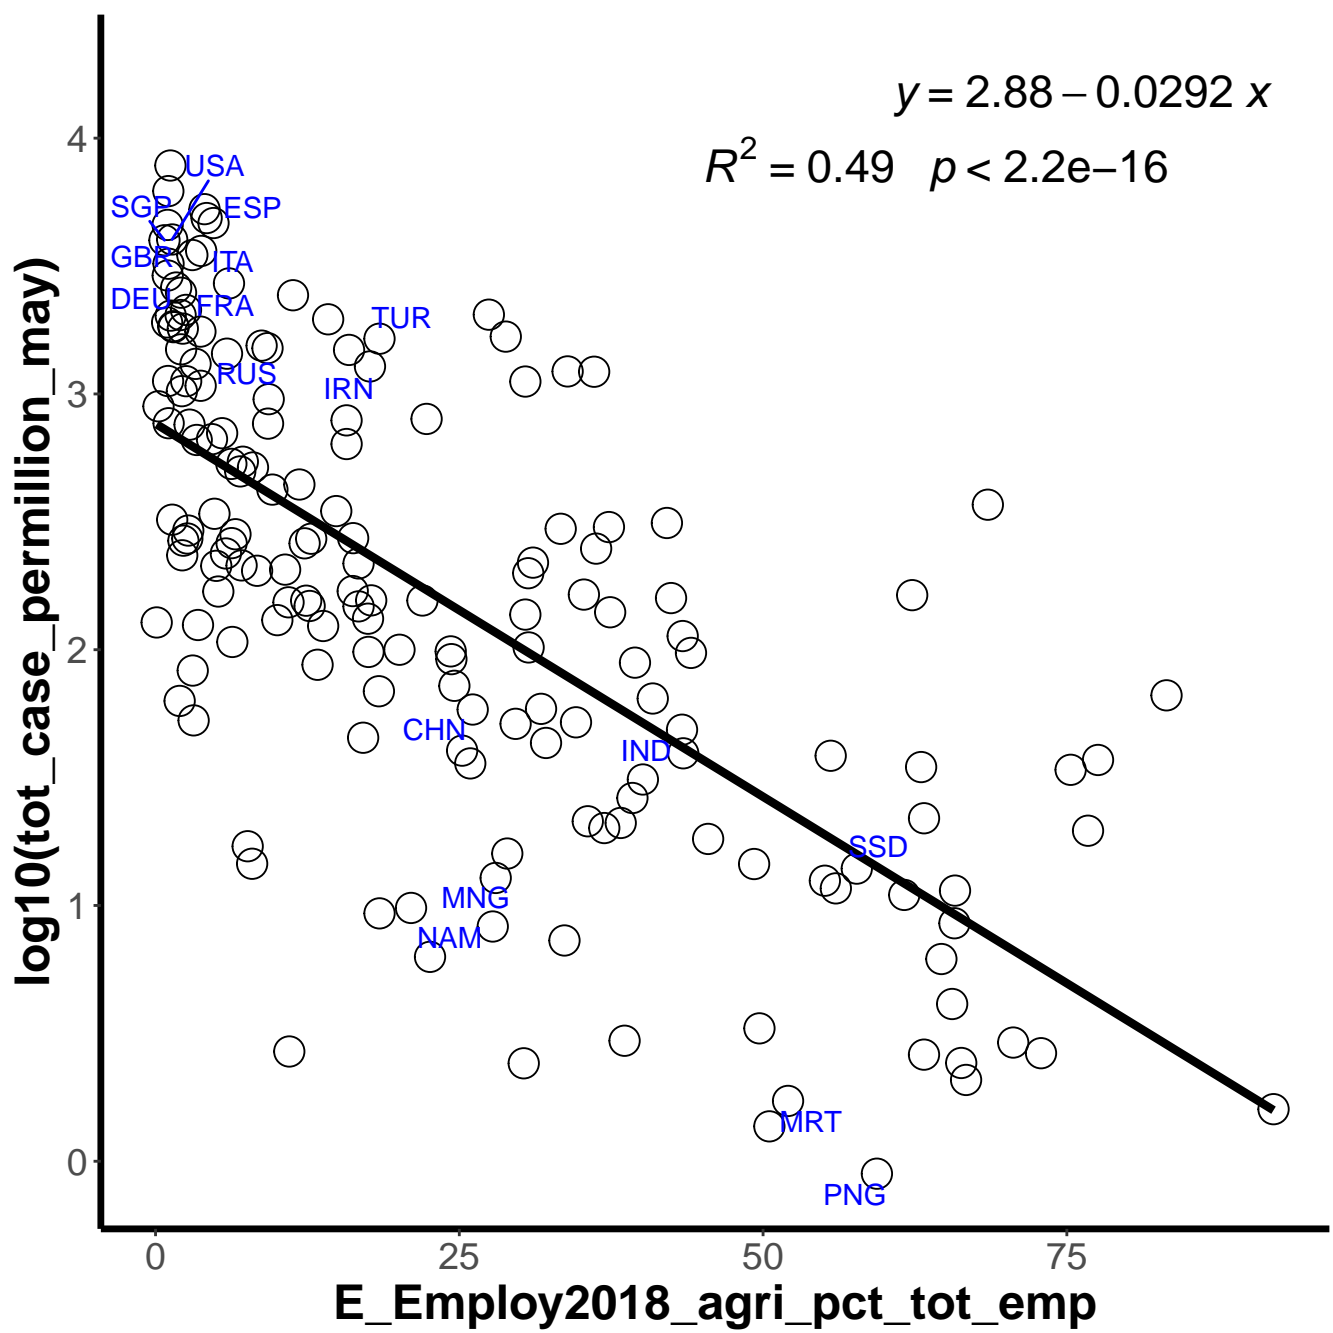

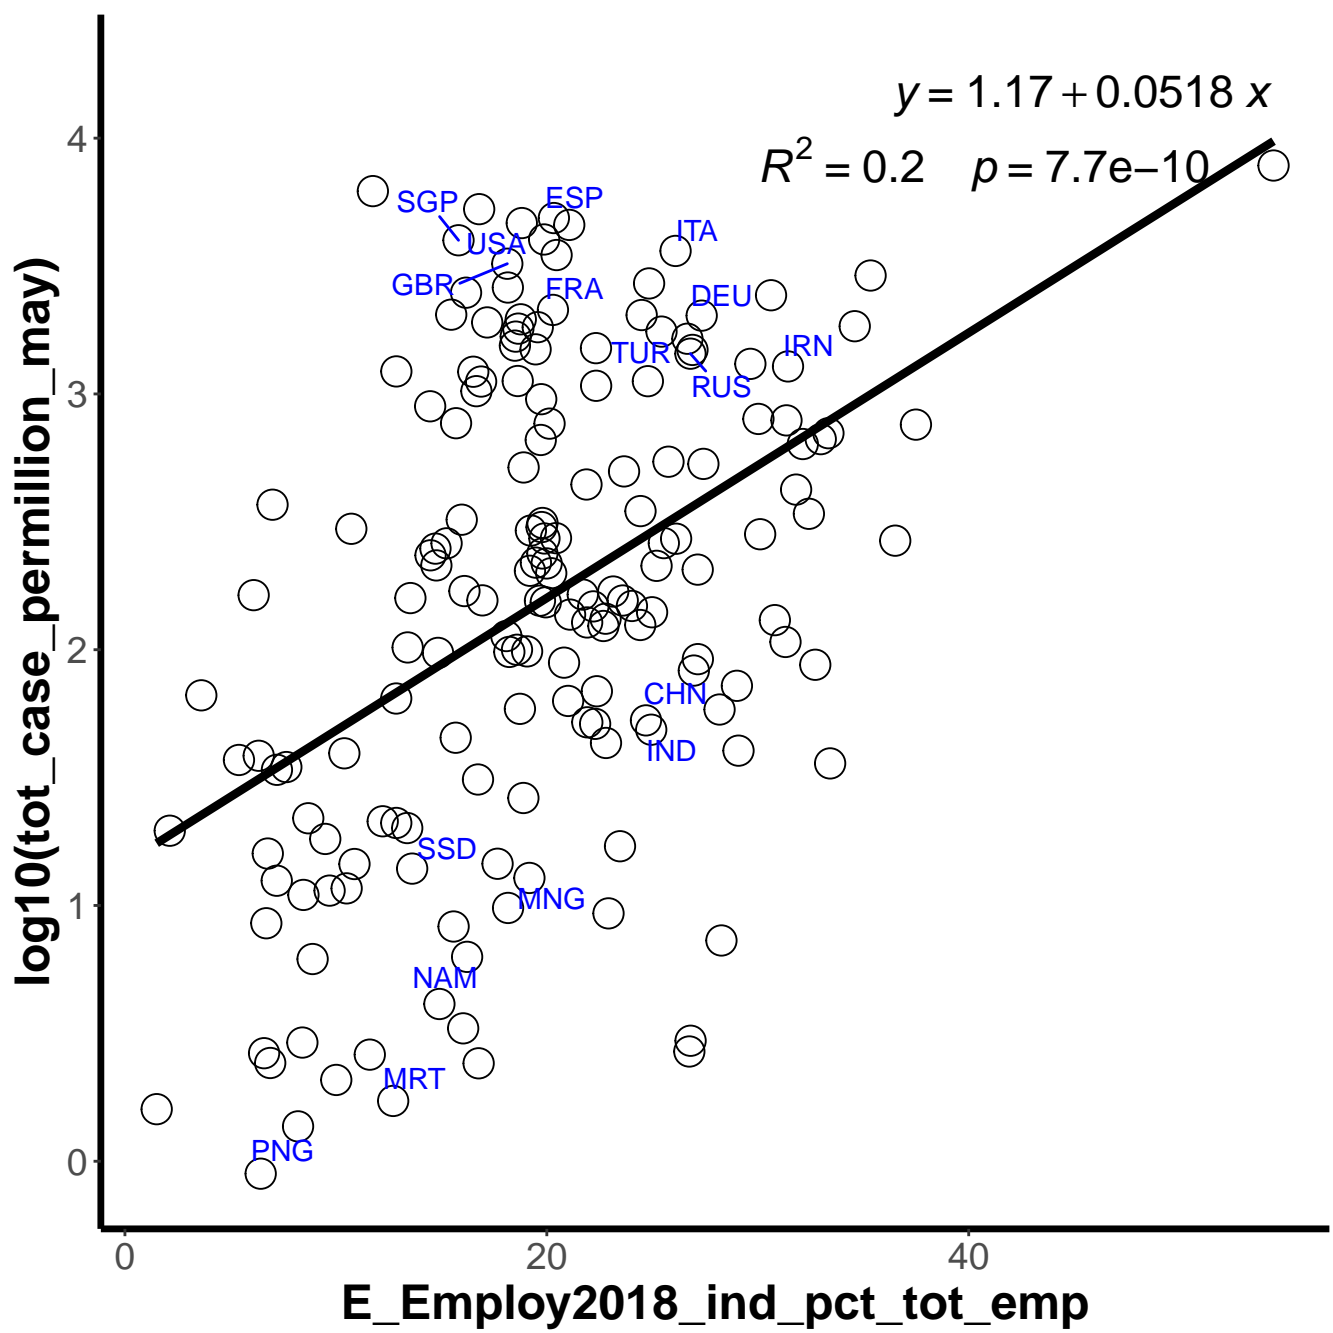

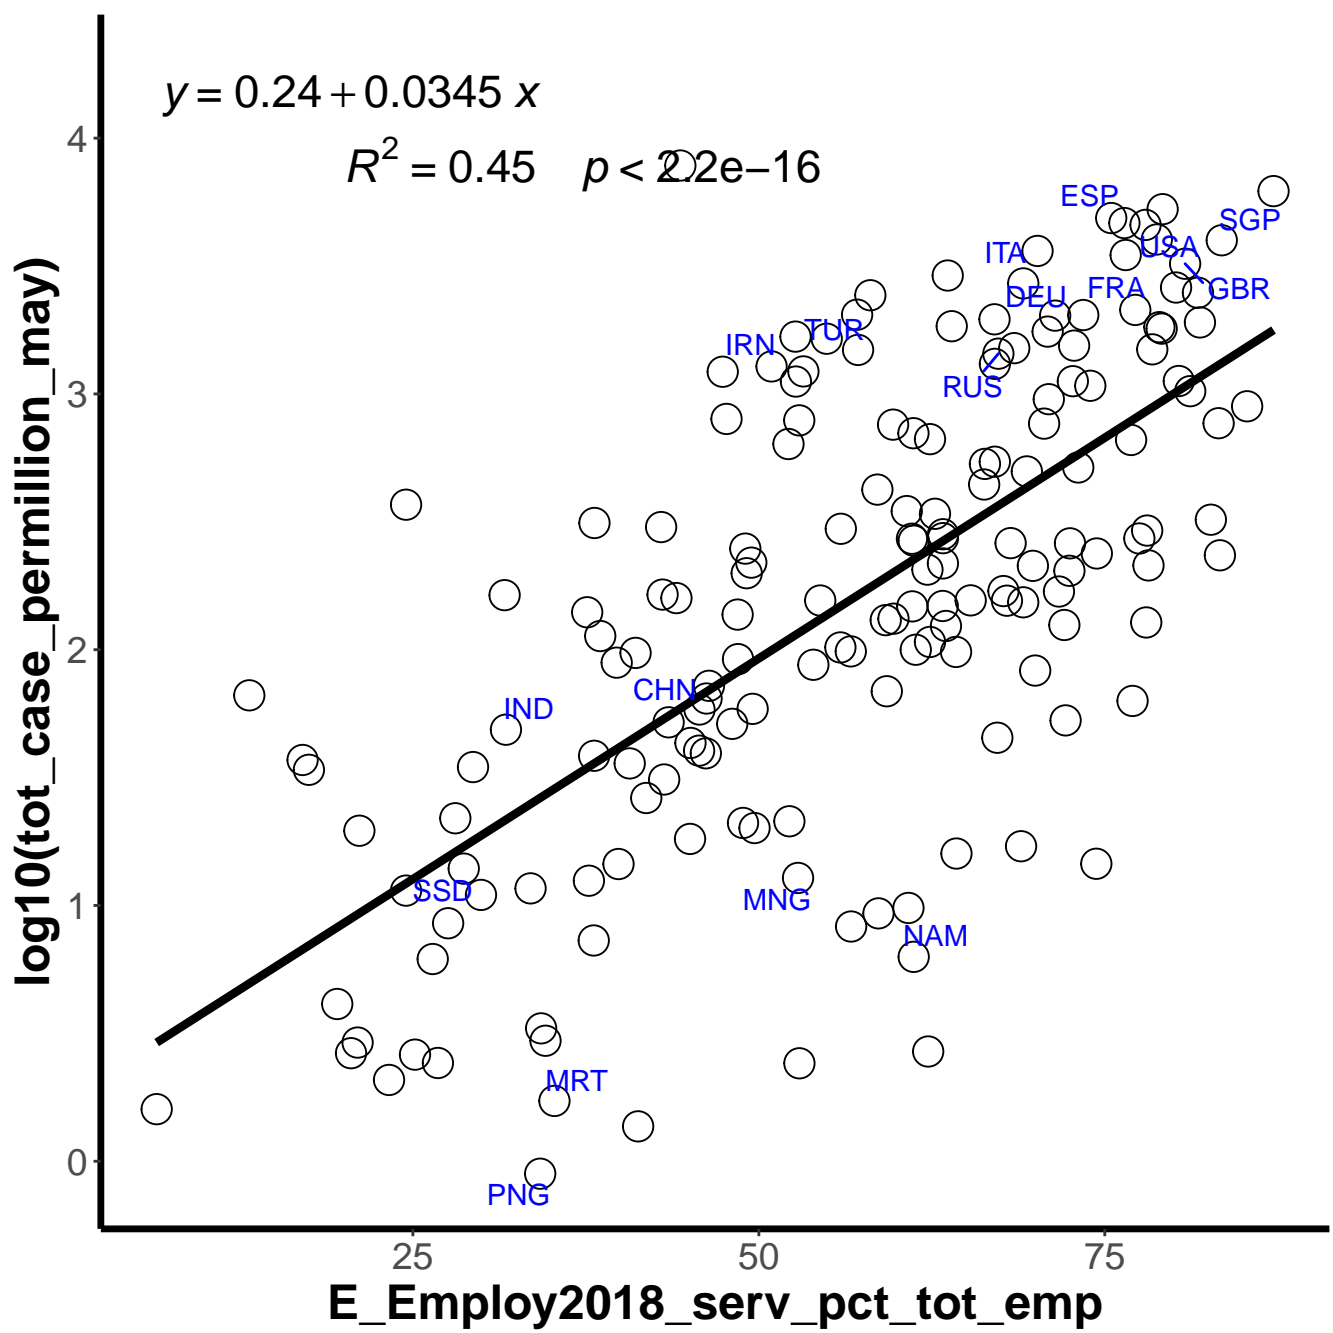

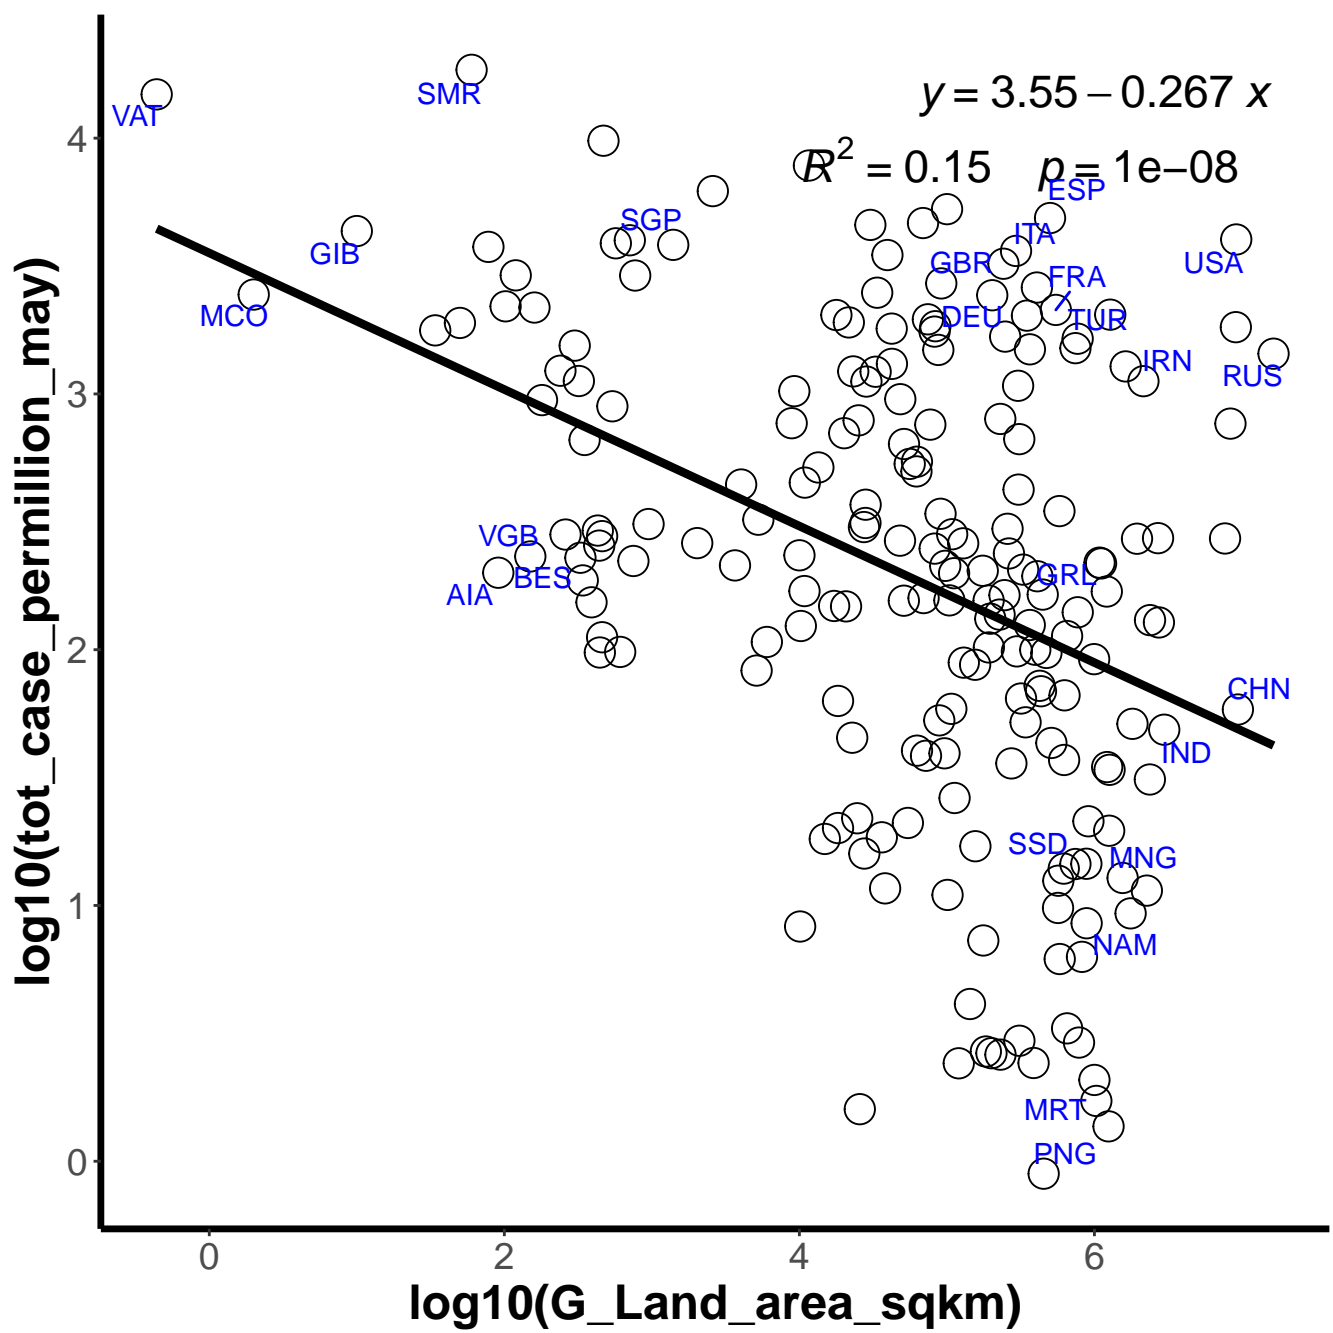

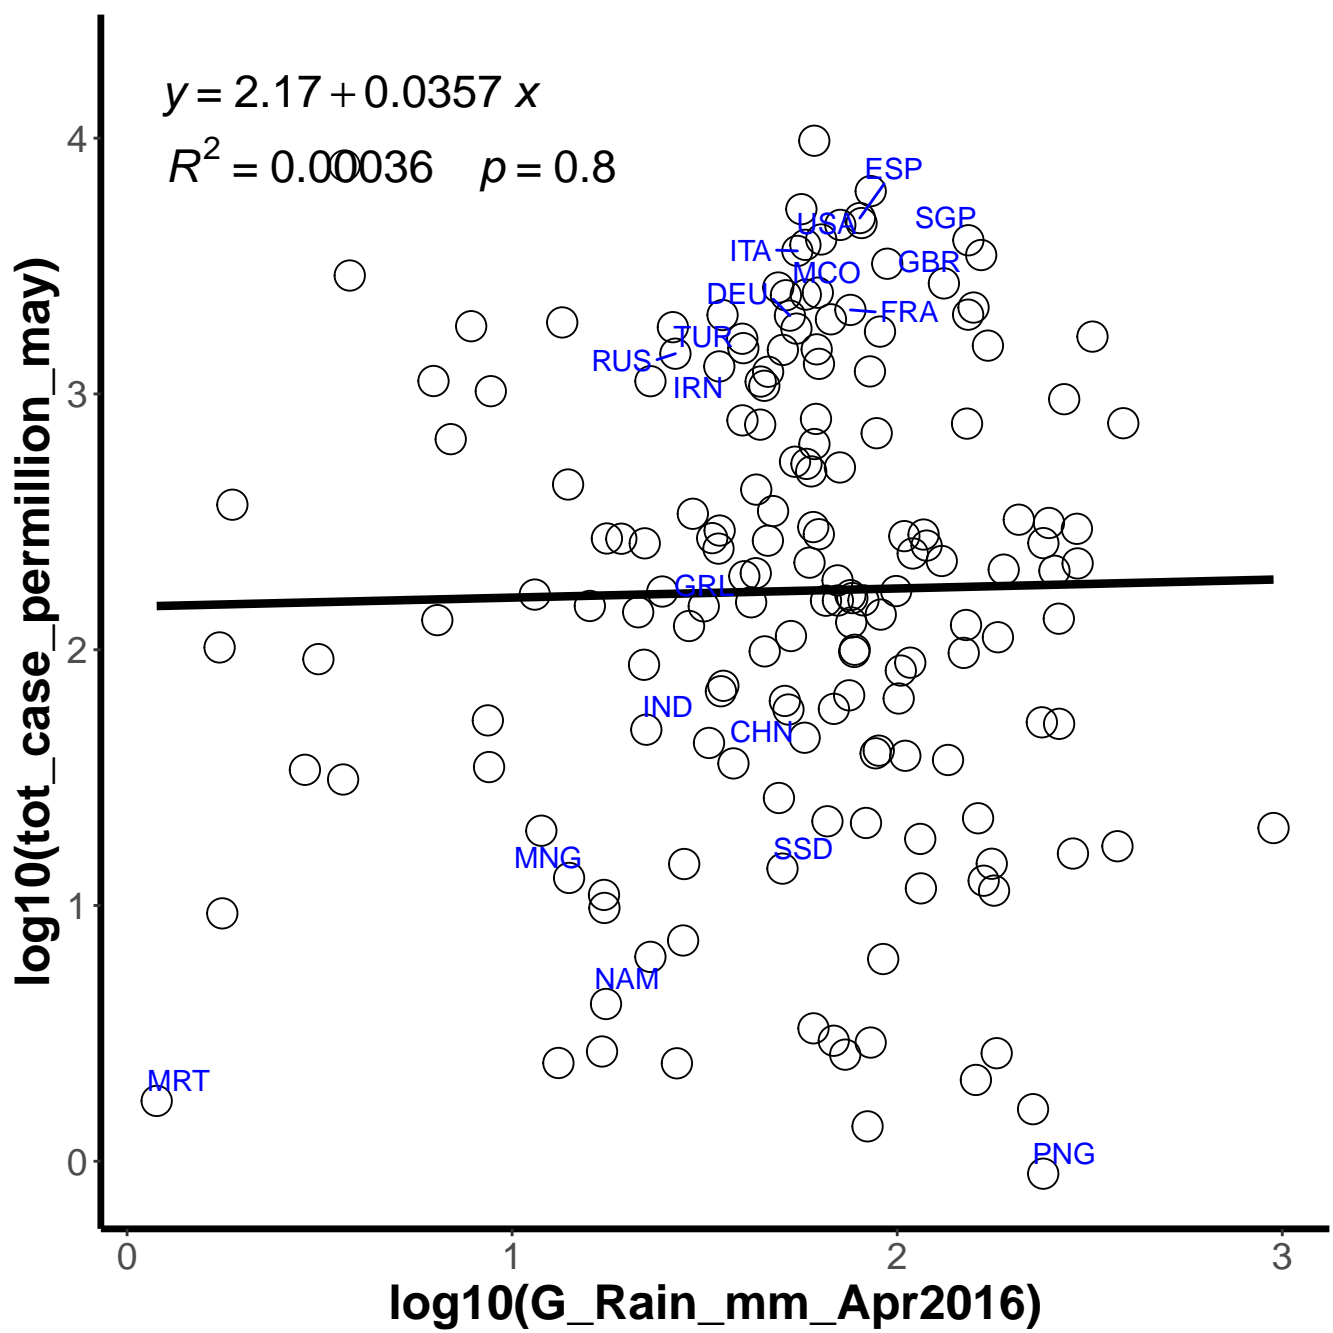

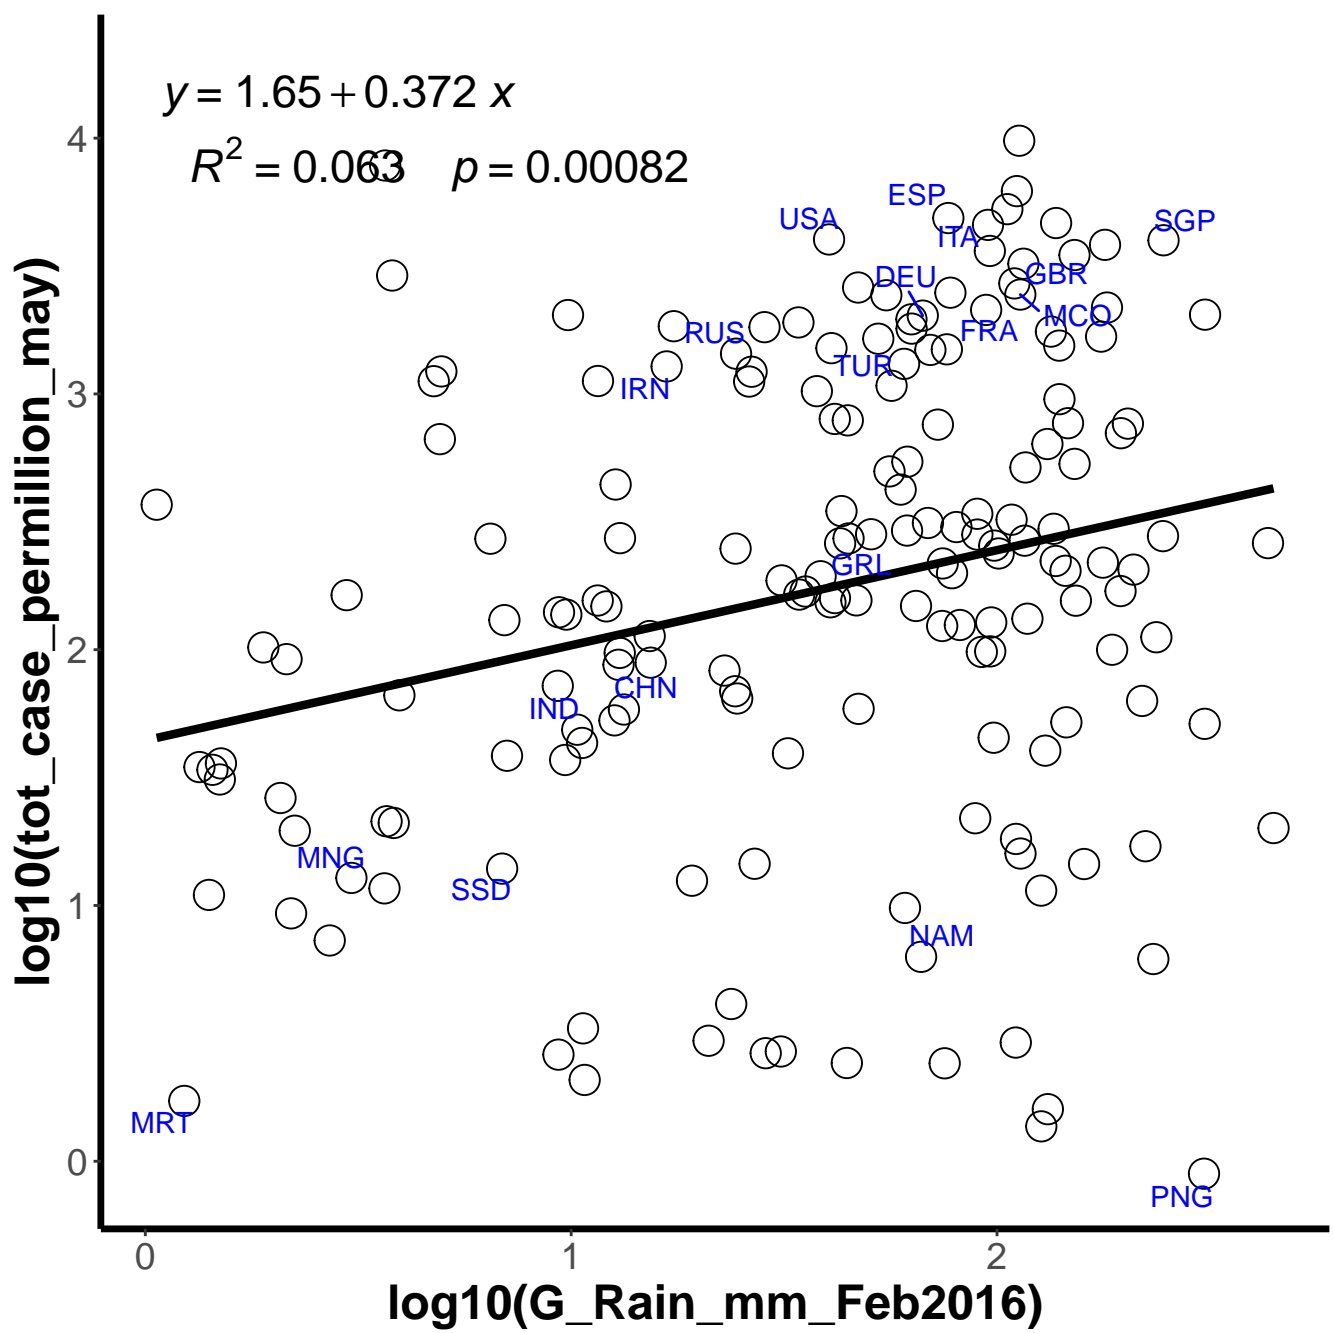

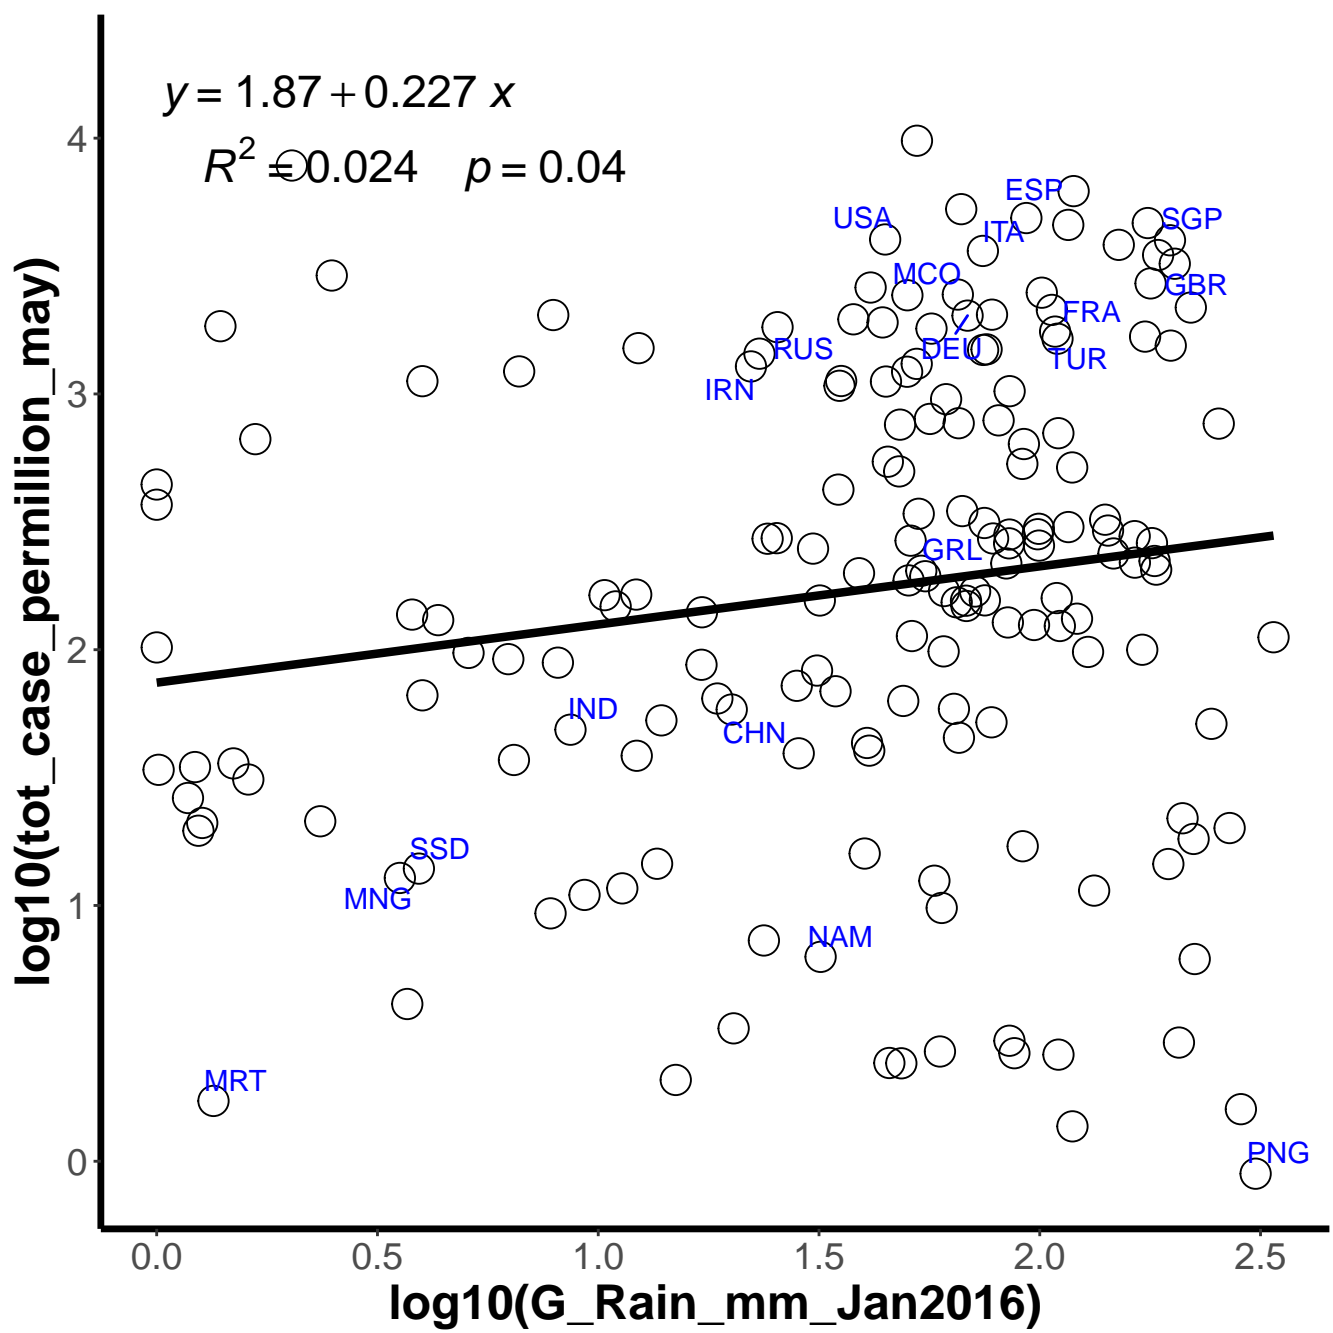

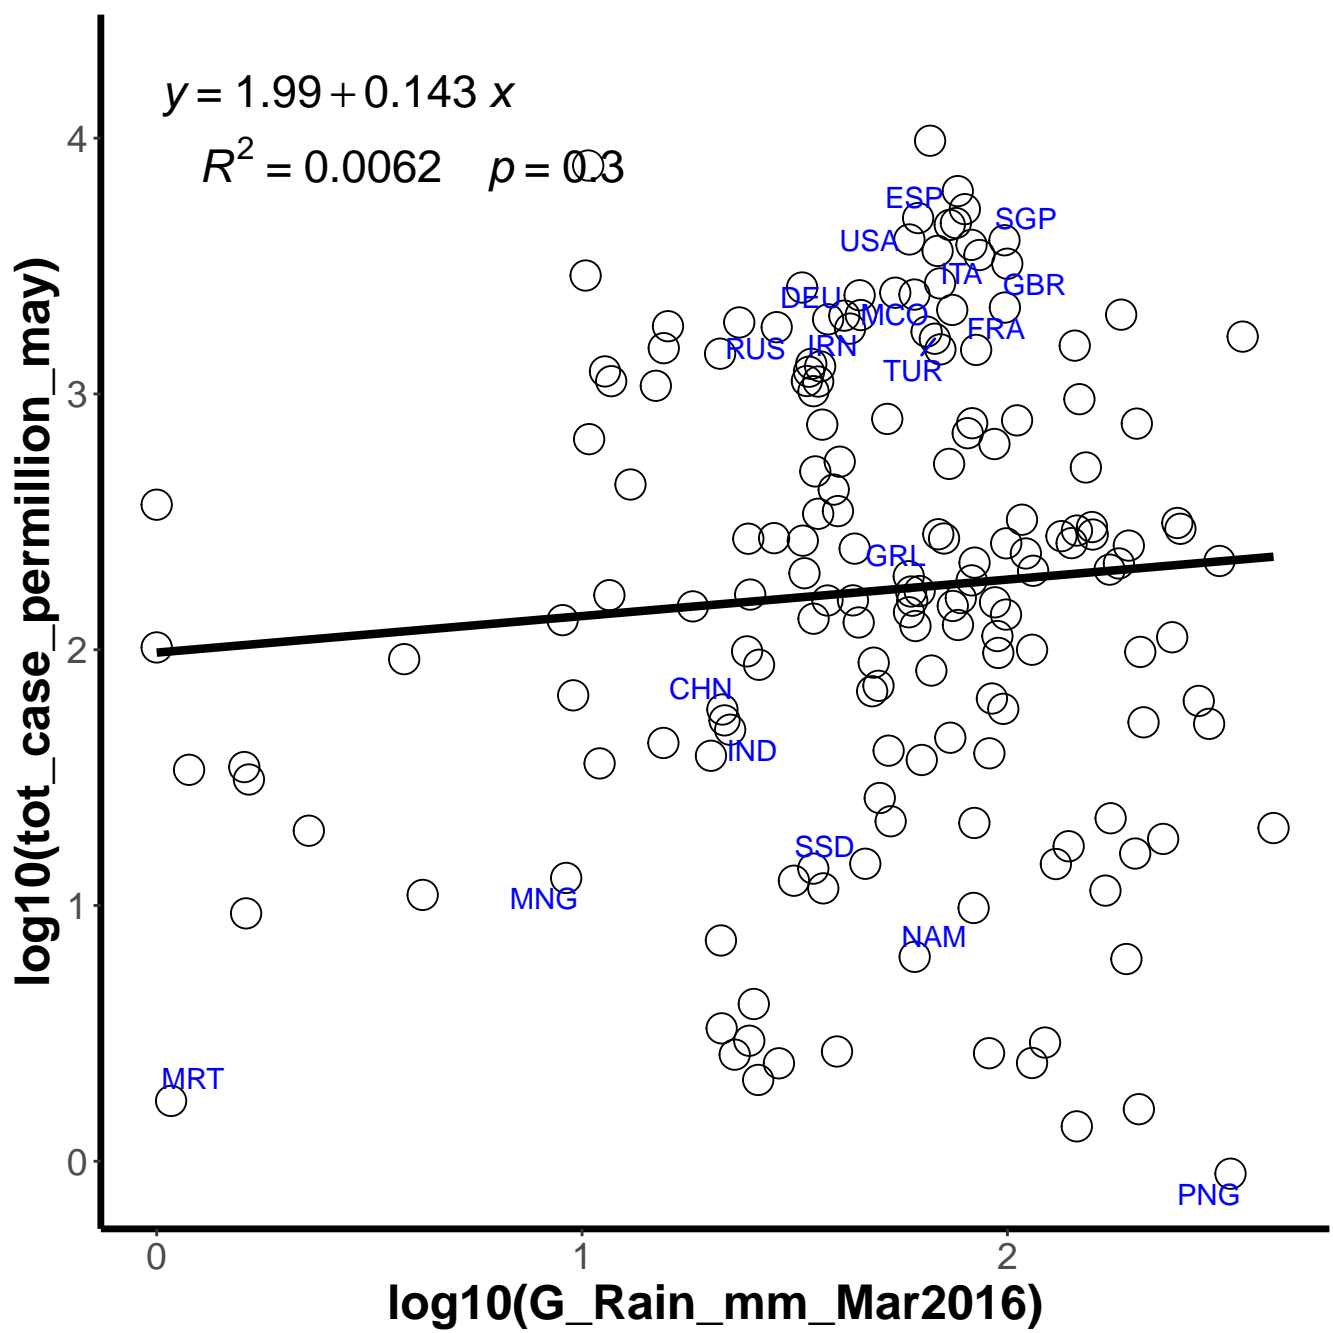



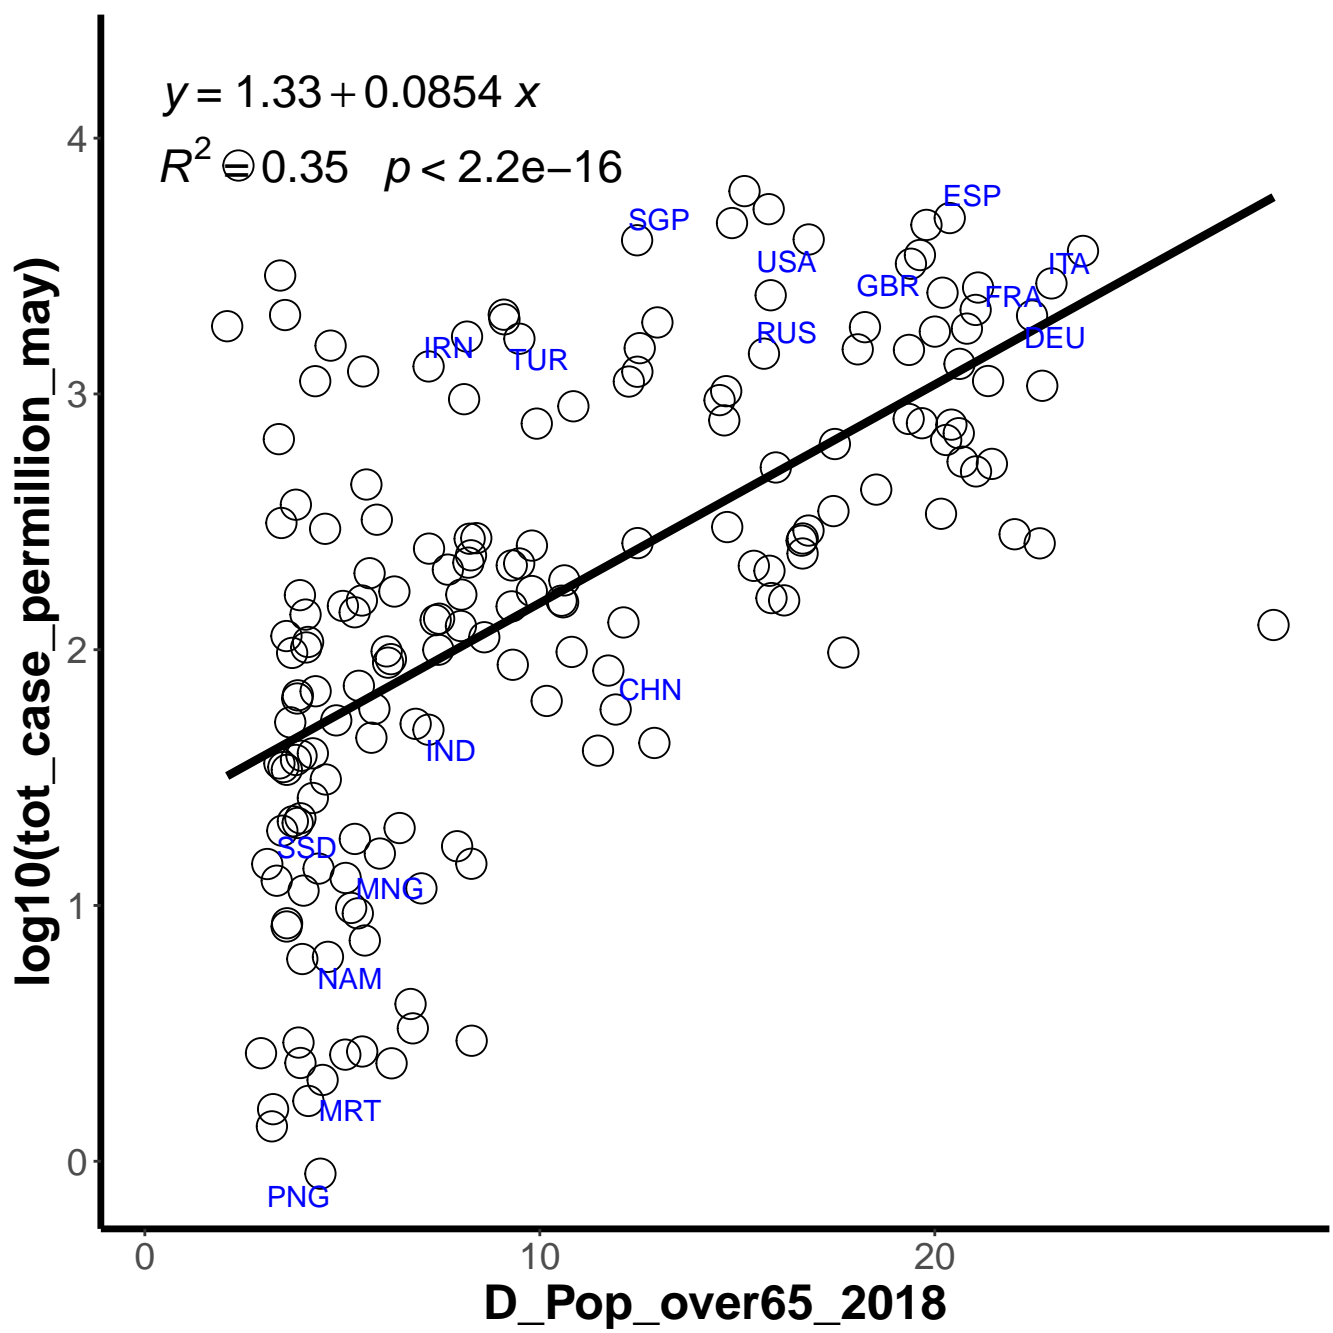

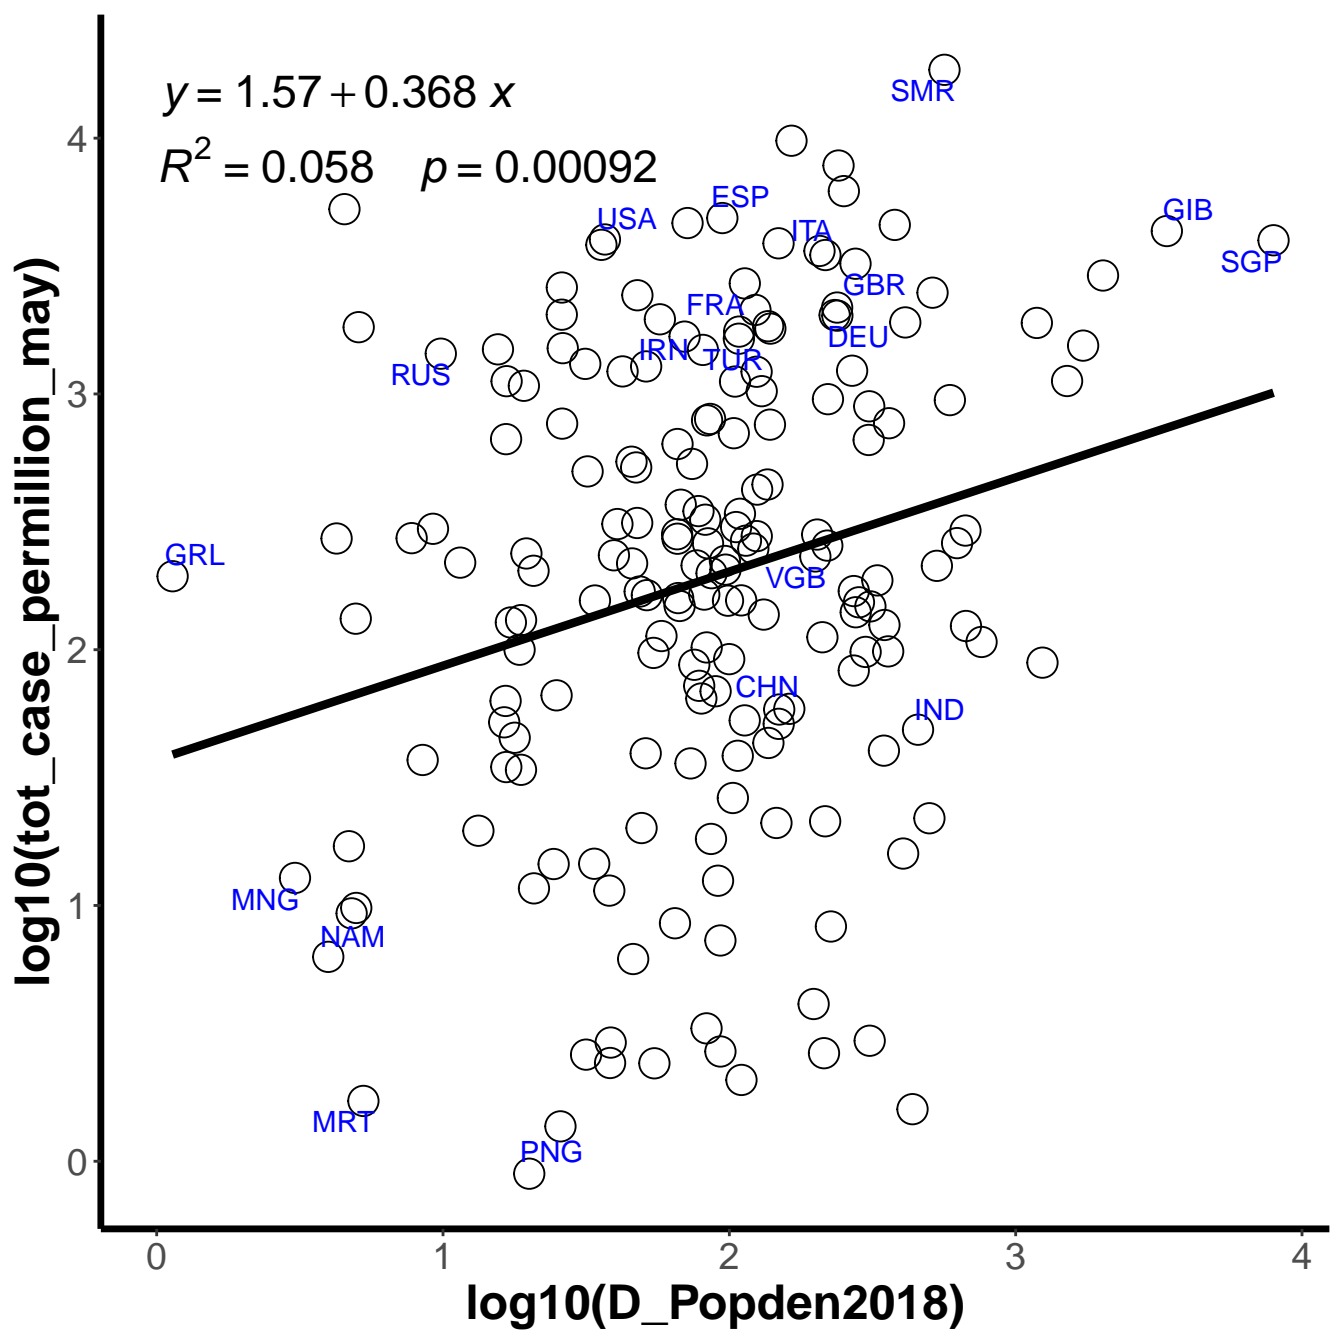

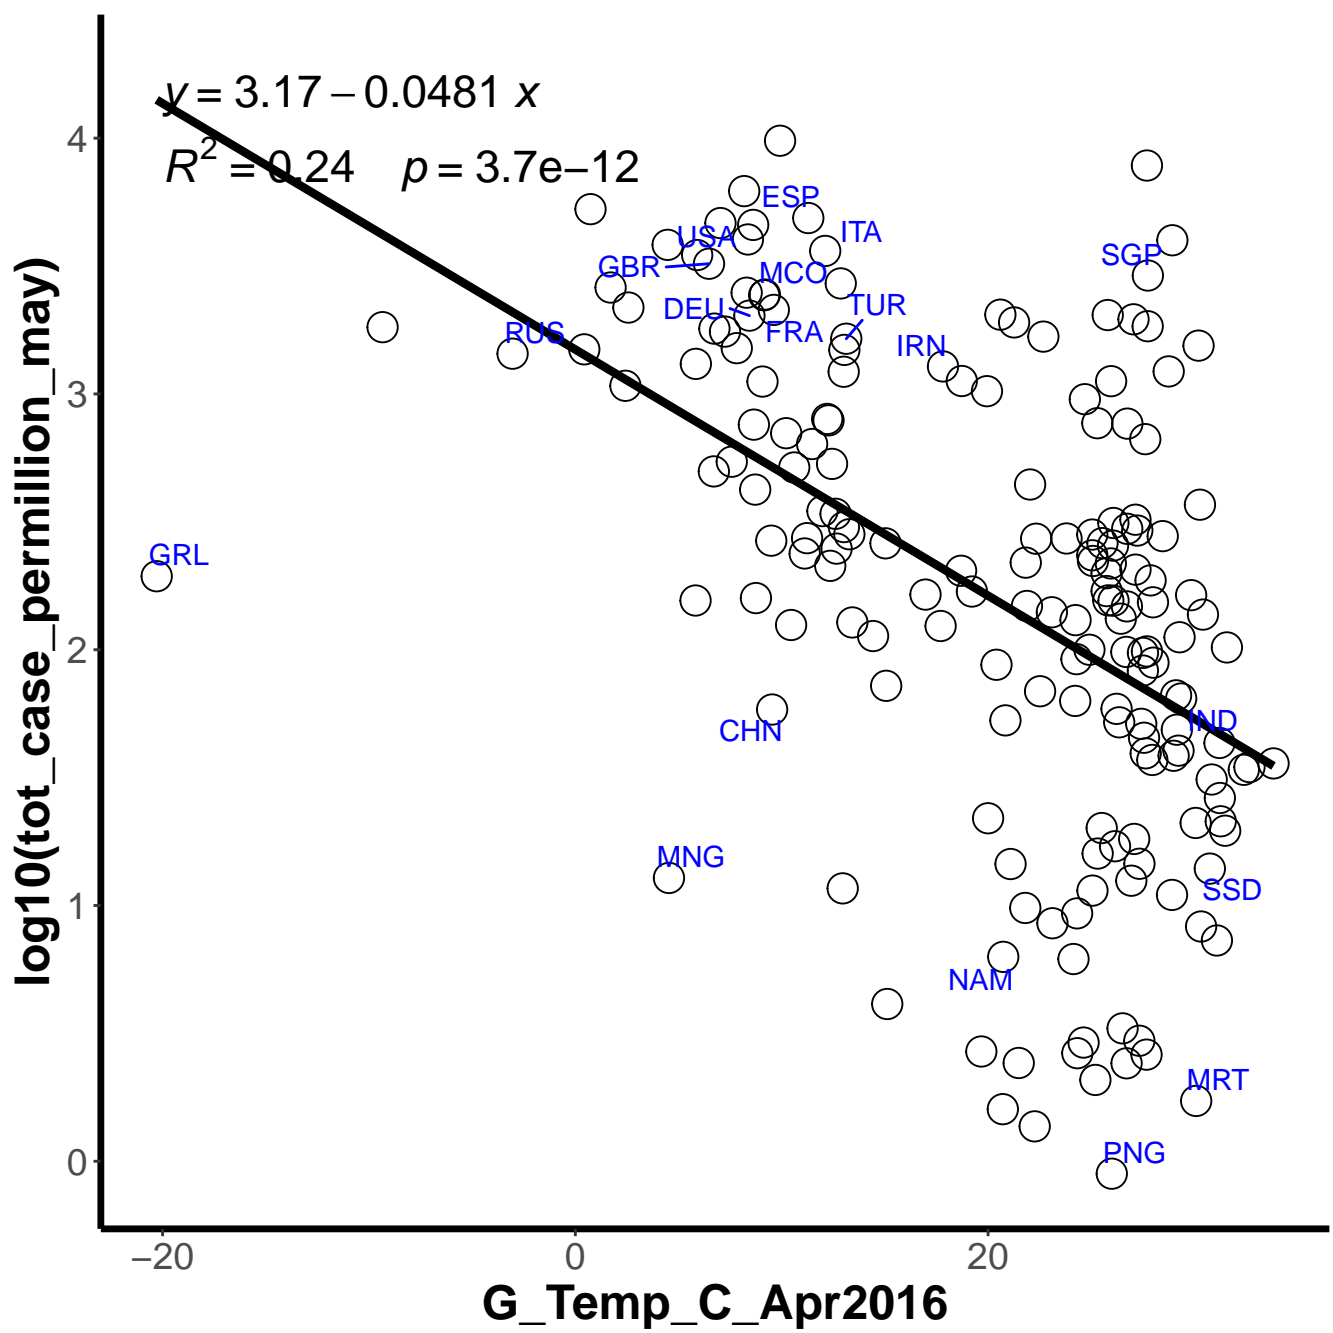

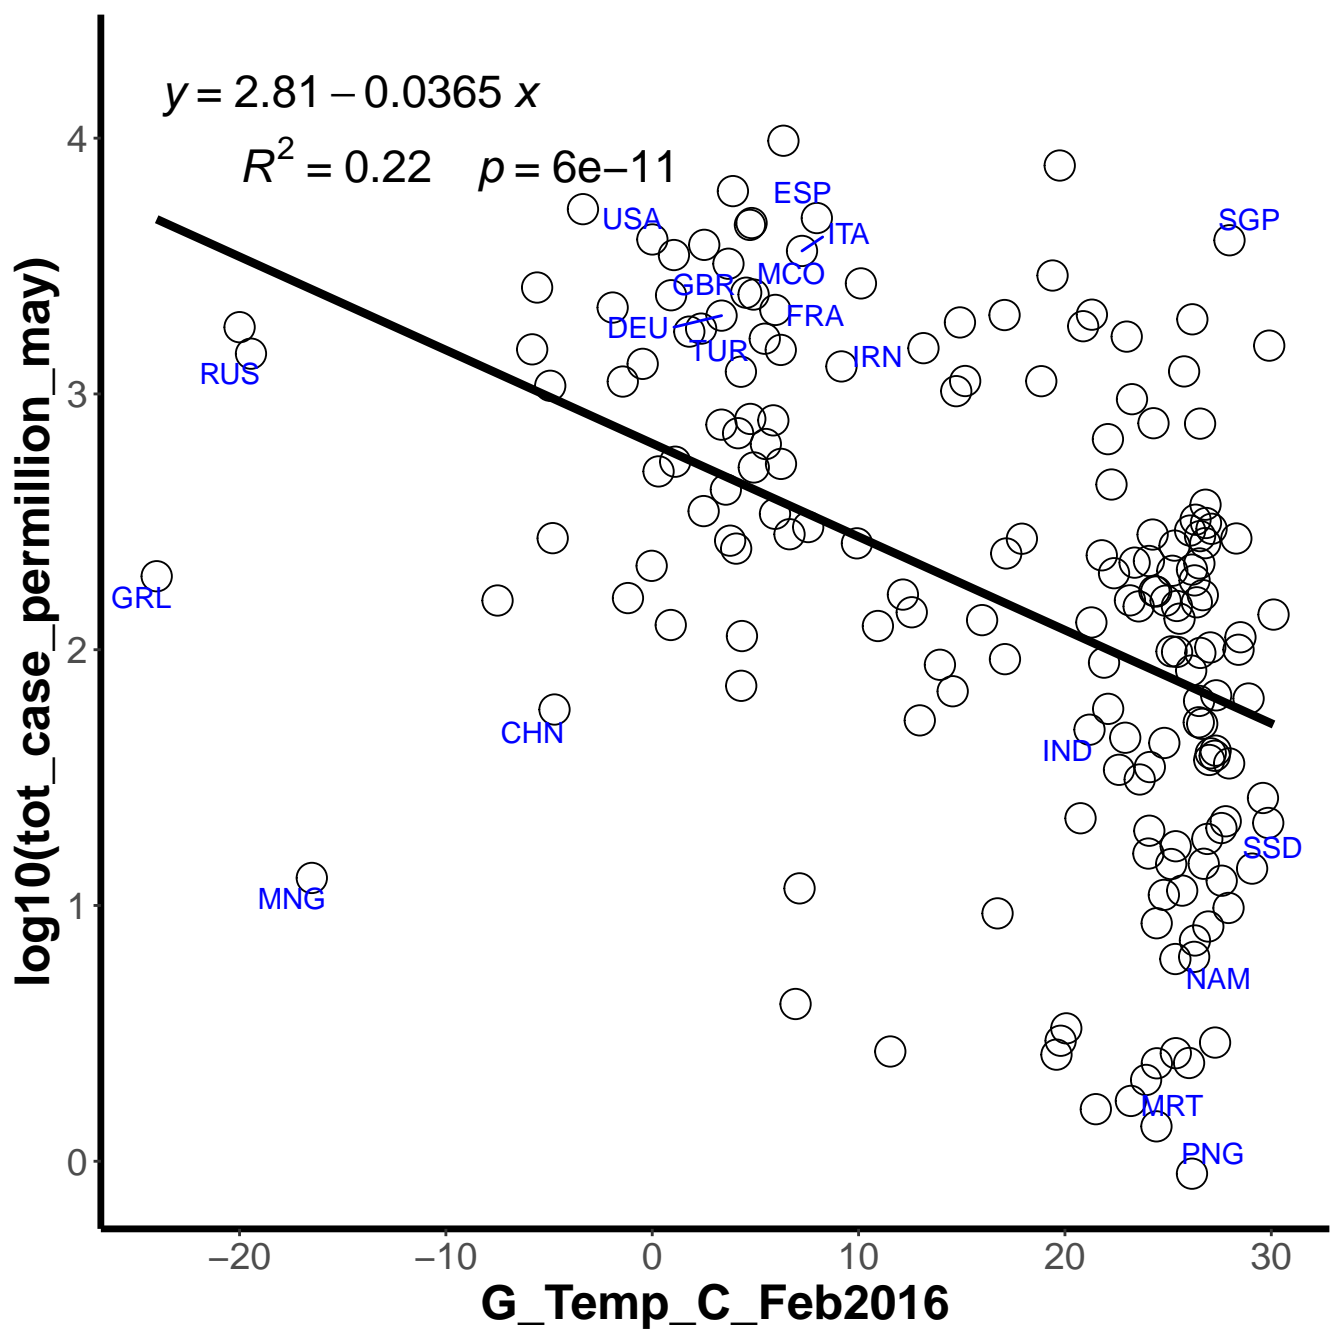

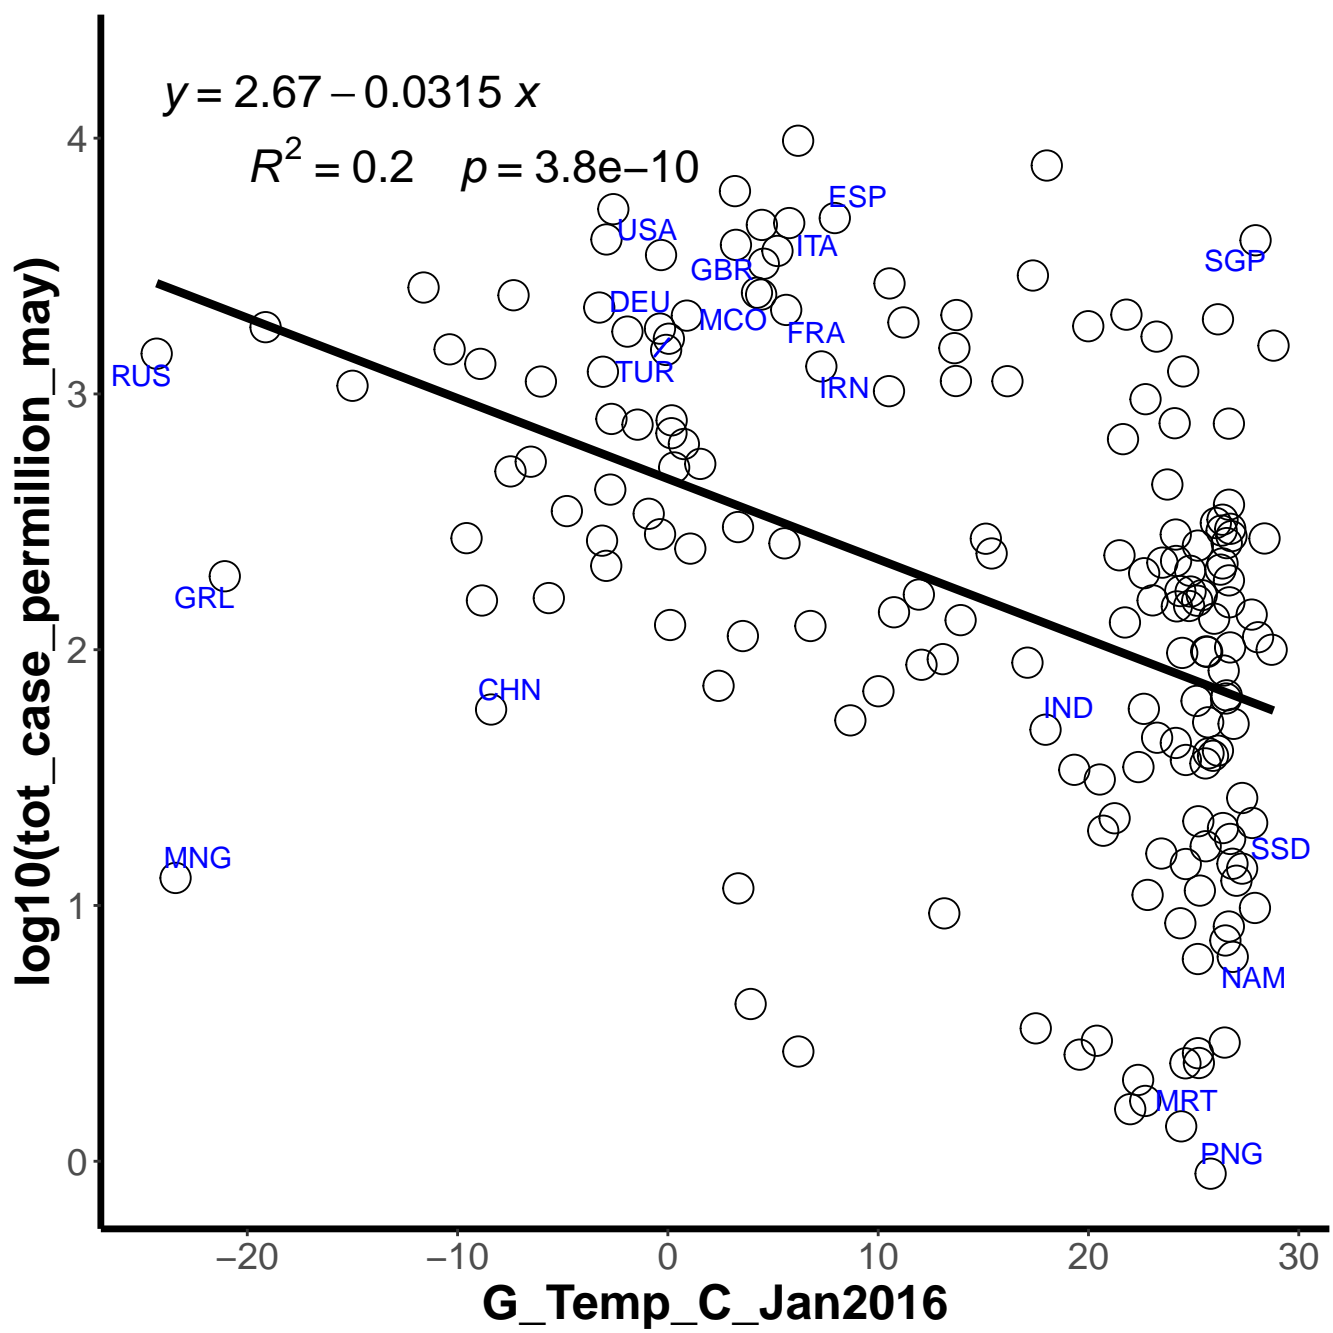

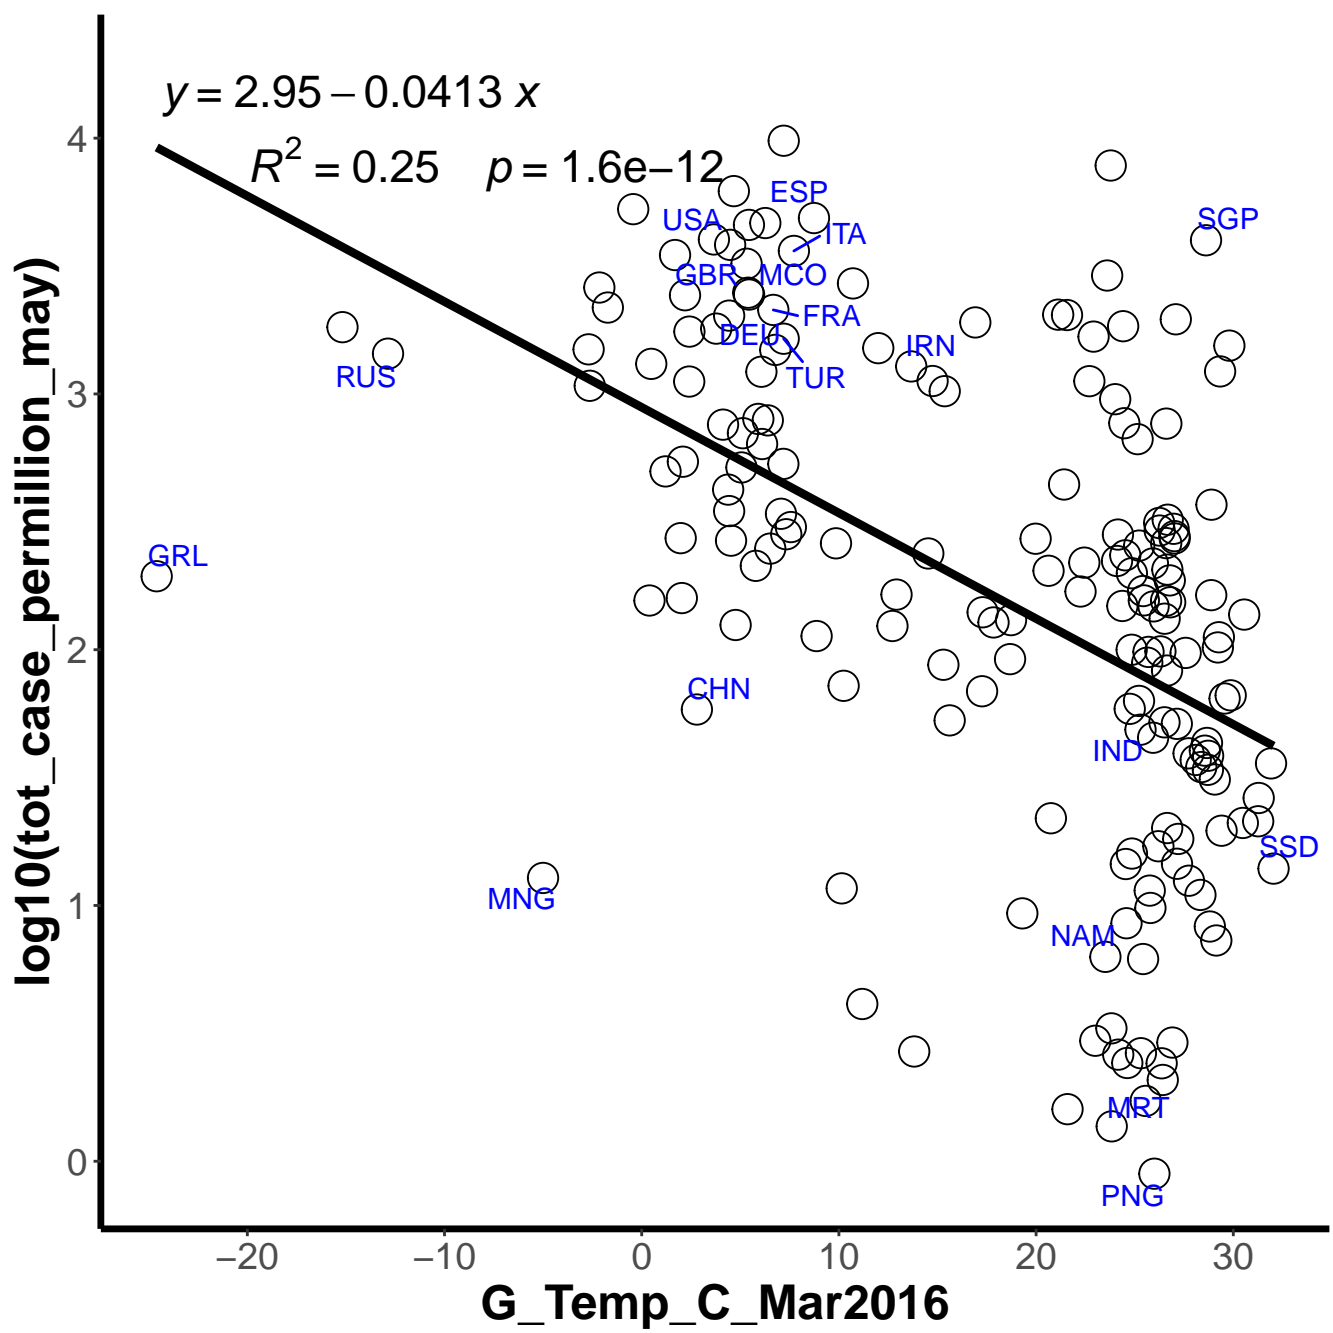

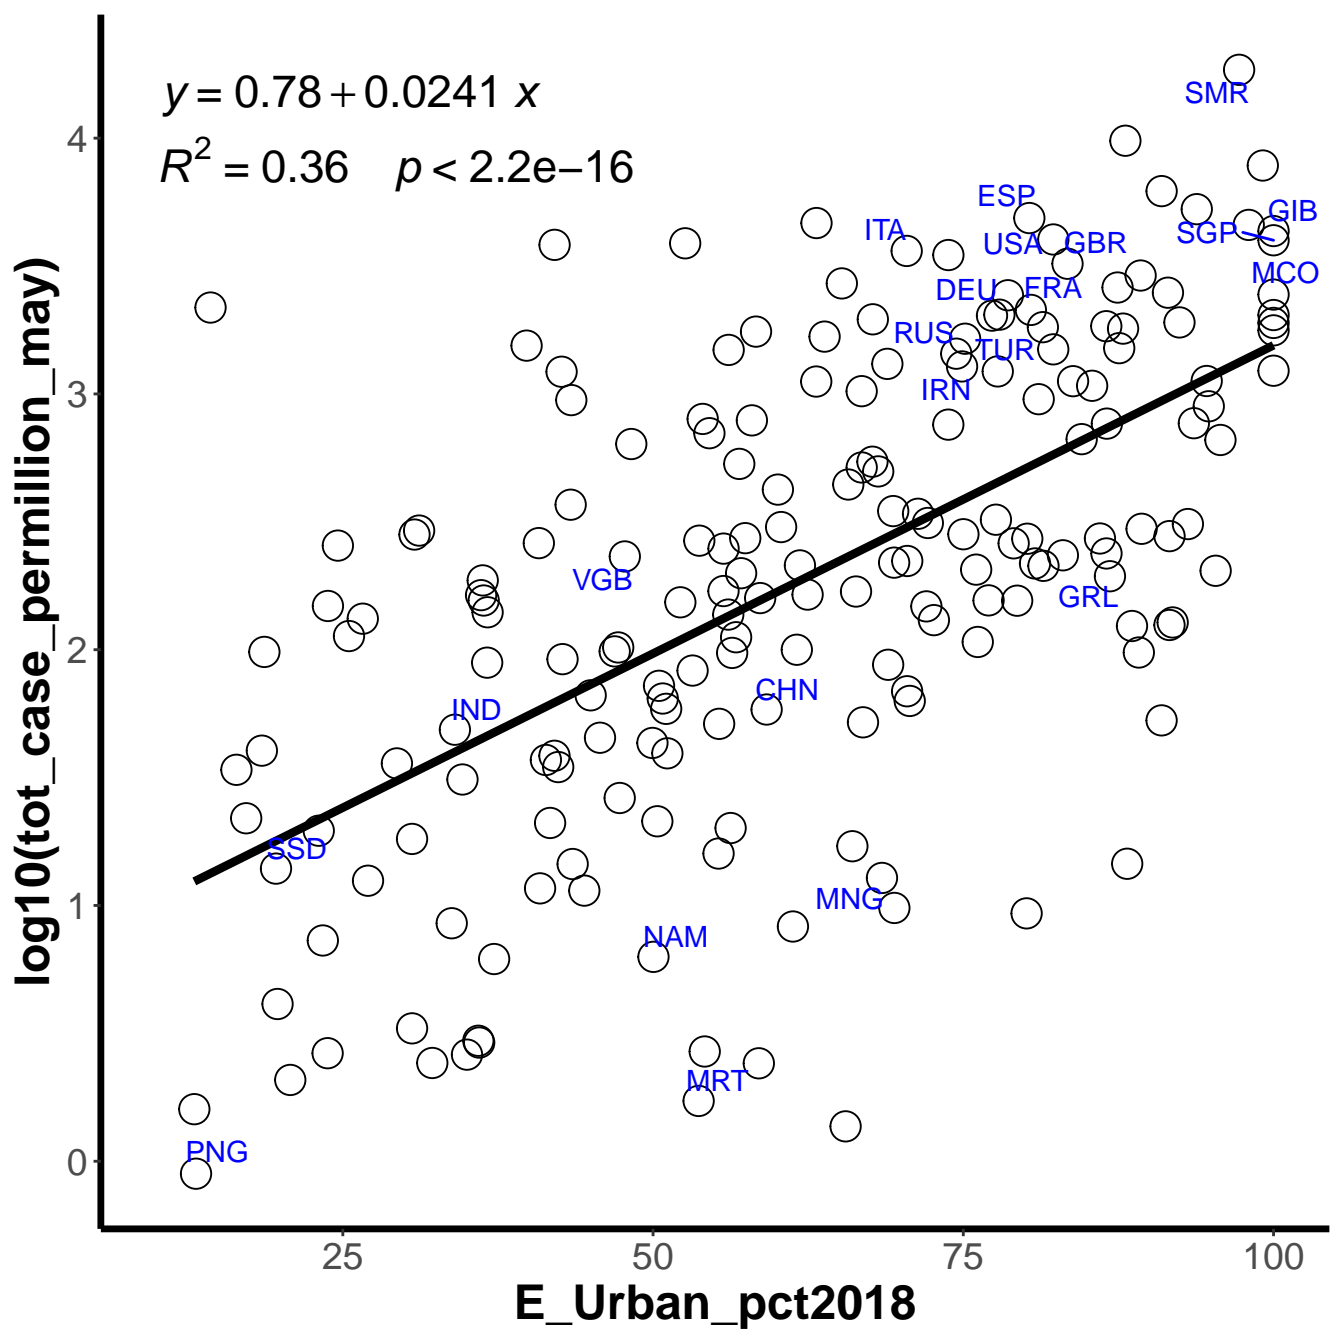

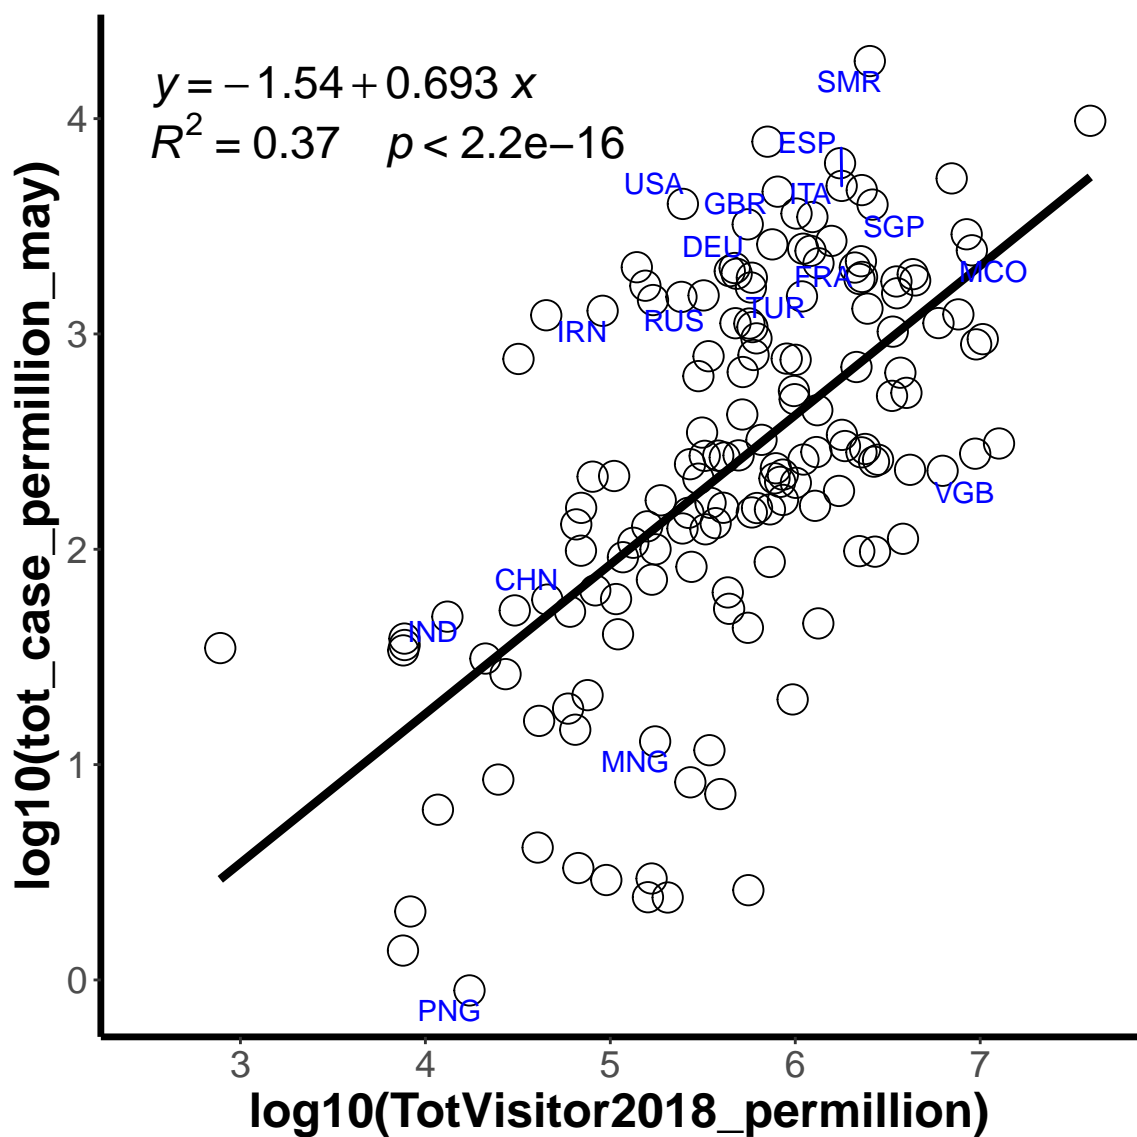

Supplement: MOESM5 [file 23604894]
