# Supplementary material for: Global-scale modeling of early factors and country-specific trajectories of COVID-19 incidence: a cross-sectional study of the first 6 months of the pandemic
Source: Springer Nature journal article supplement (doi:10.1186/s12889-022-14336-w), 2022-10-14

**Additional File 7. Country-specific trajectories of new COVID-19 cases around lockdown periods until June 30, 2020.** In each graph, the line joining the points is simply to make the order of the points more evident, and does not relate to any fitting of the datapoints. The days are plotted on the x-axis (as dates) and the number of reported new cases are plotted on the y-axis. The start and end dates of the lockdown are indicated by blue vertical lines.

lockdown\_New\_cases\_Afghanistan

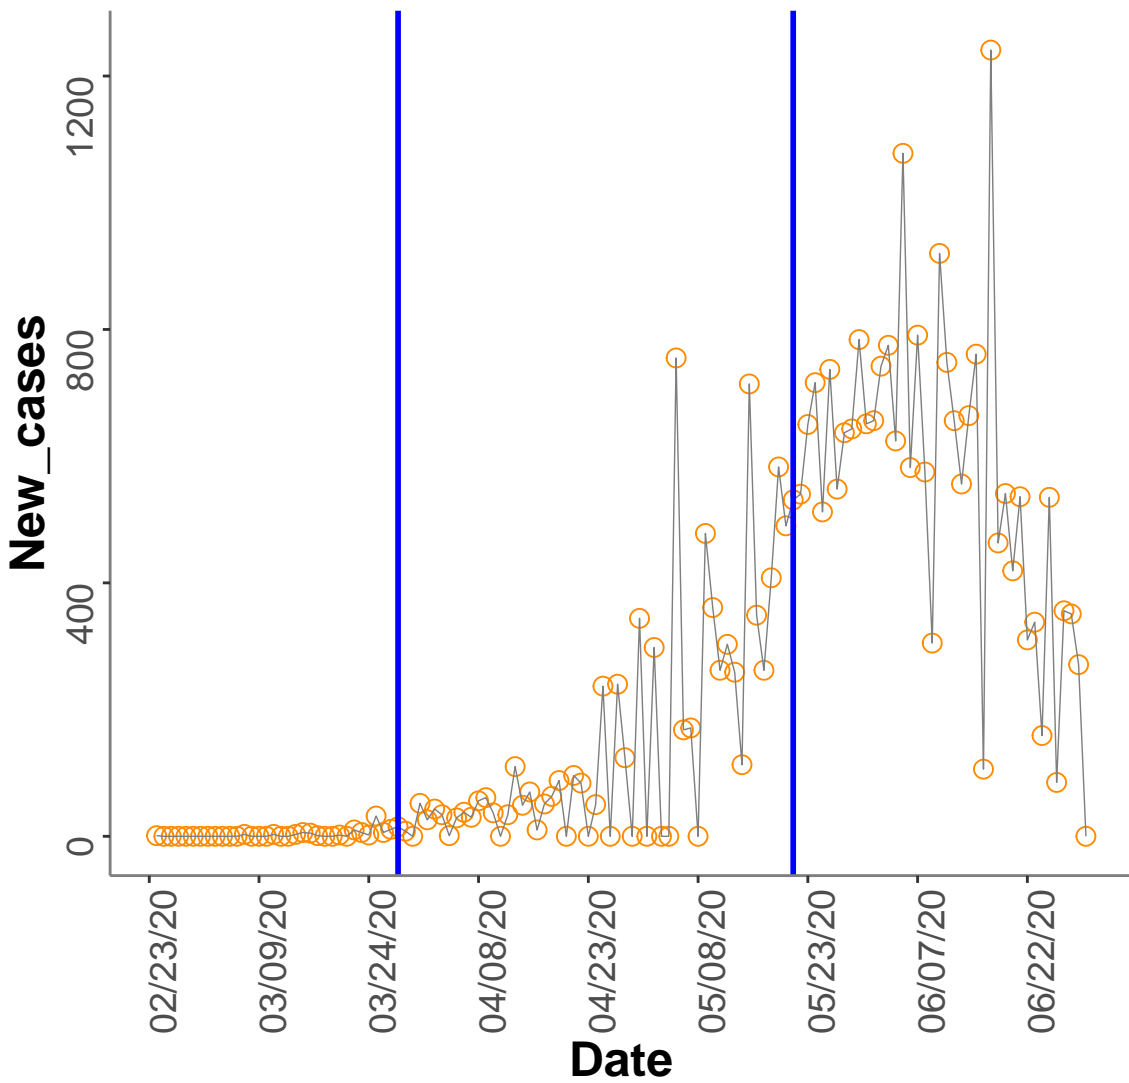

lockdown\_New\_cases\_Albania

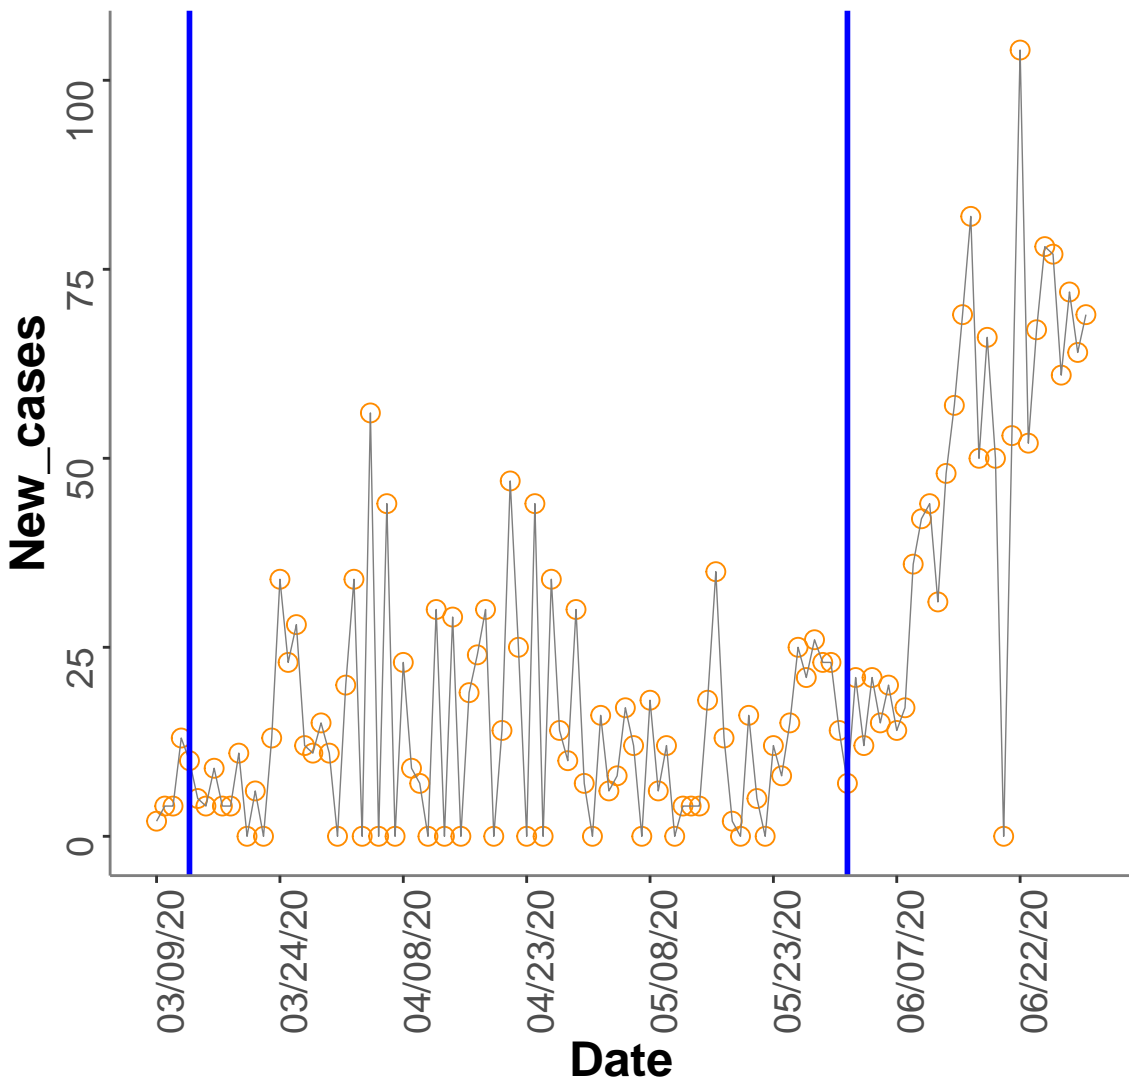

lockdown\_New\_cases\_Algeria

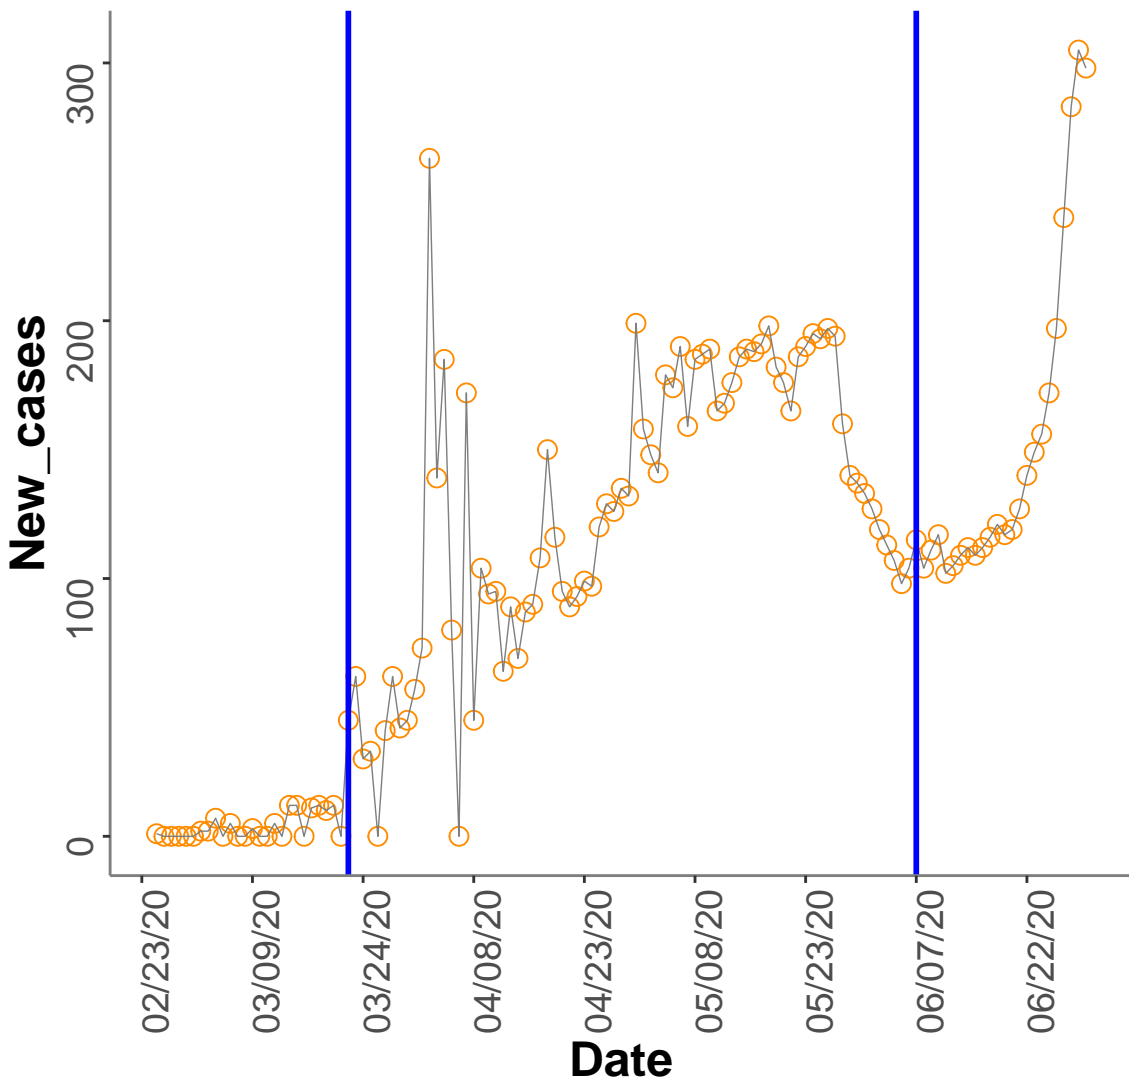

lockdown\_New\_cases\_Argentina

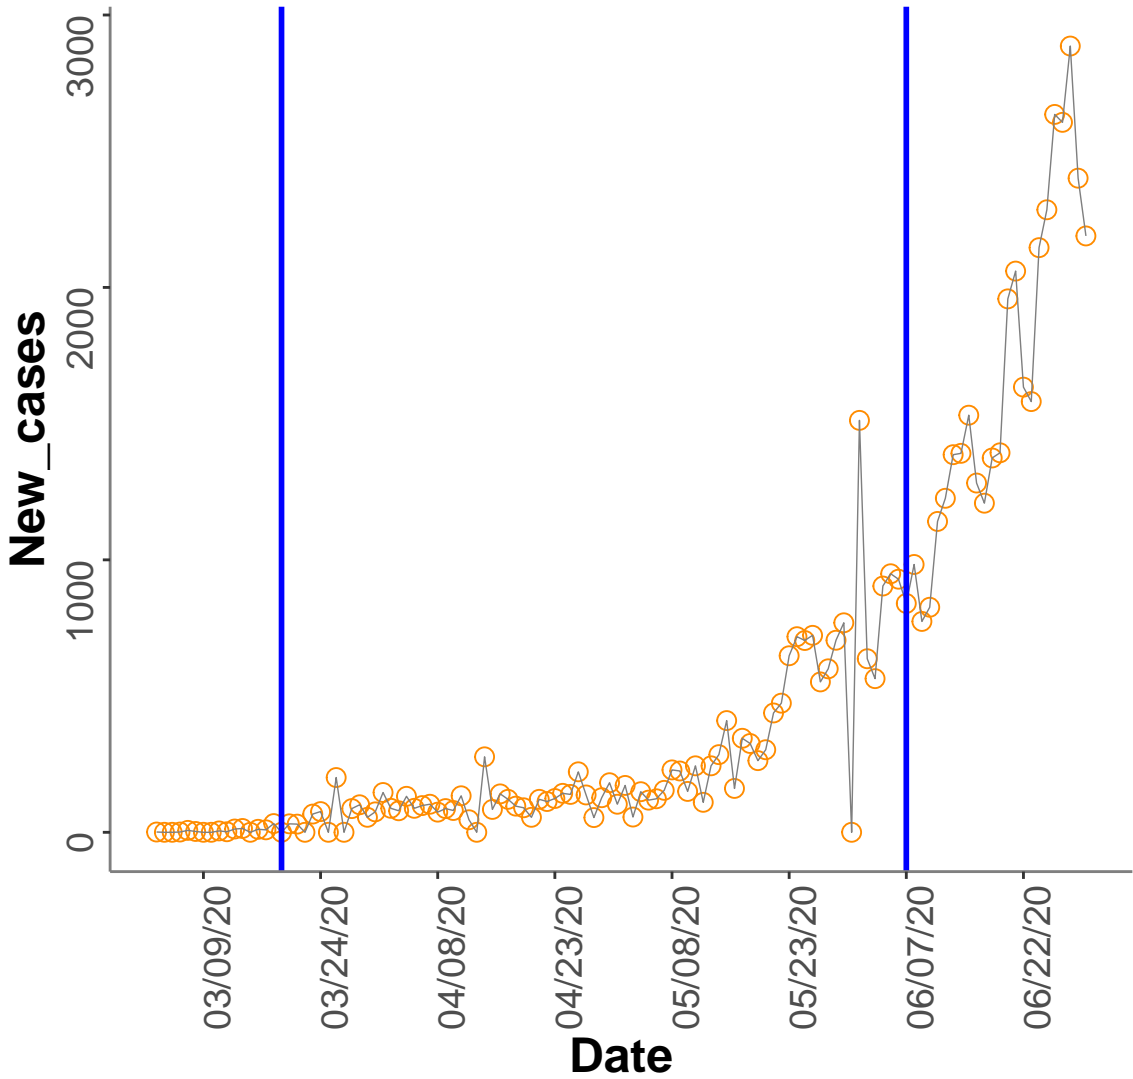

lockdown\_New\_cases\_Armenia

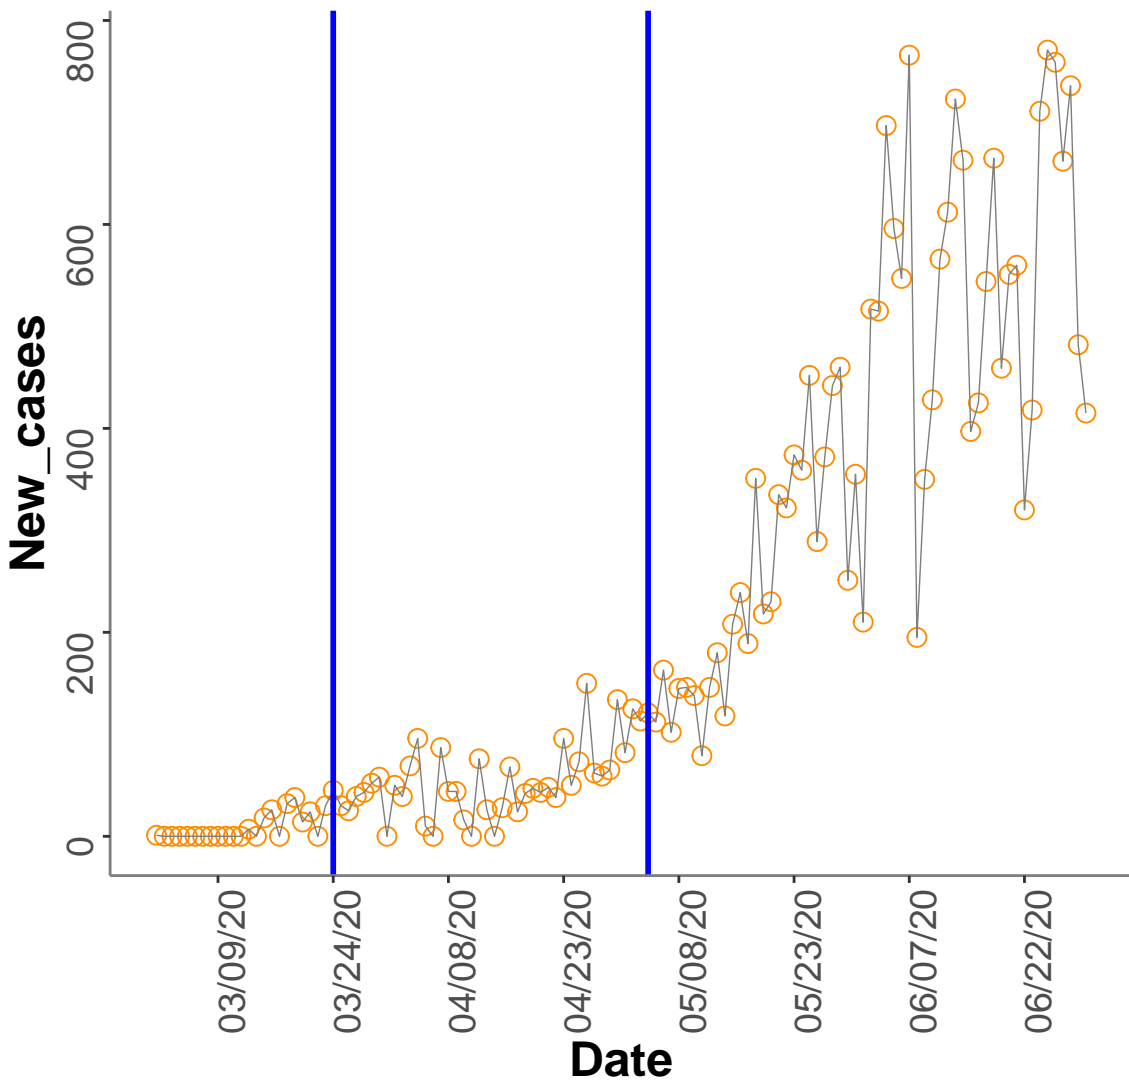

lockdown\_New\_cases\_Australia

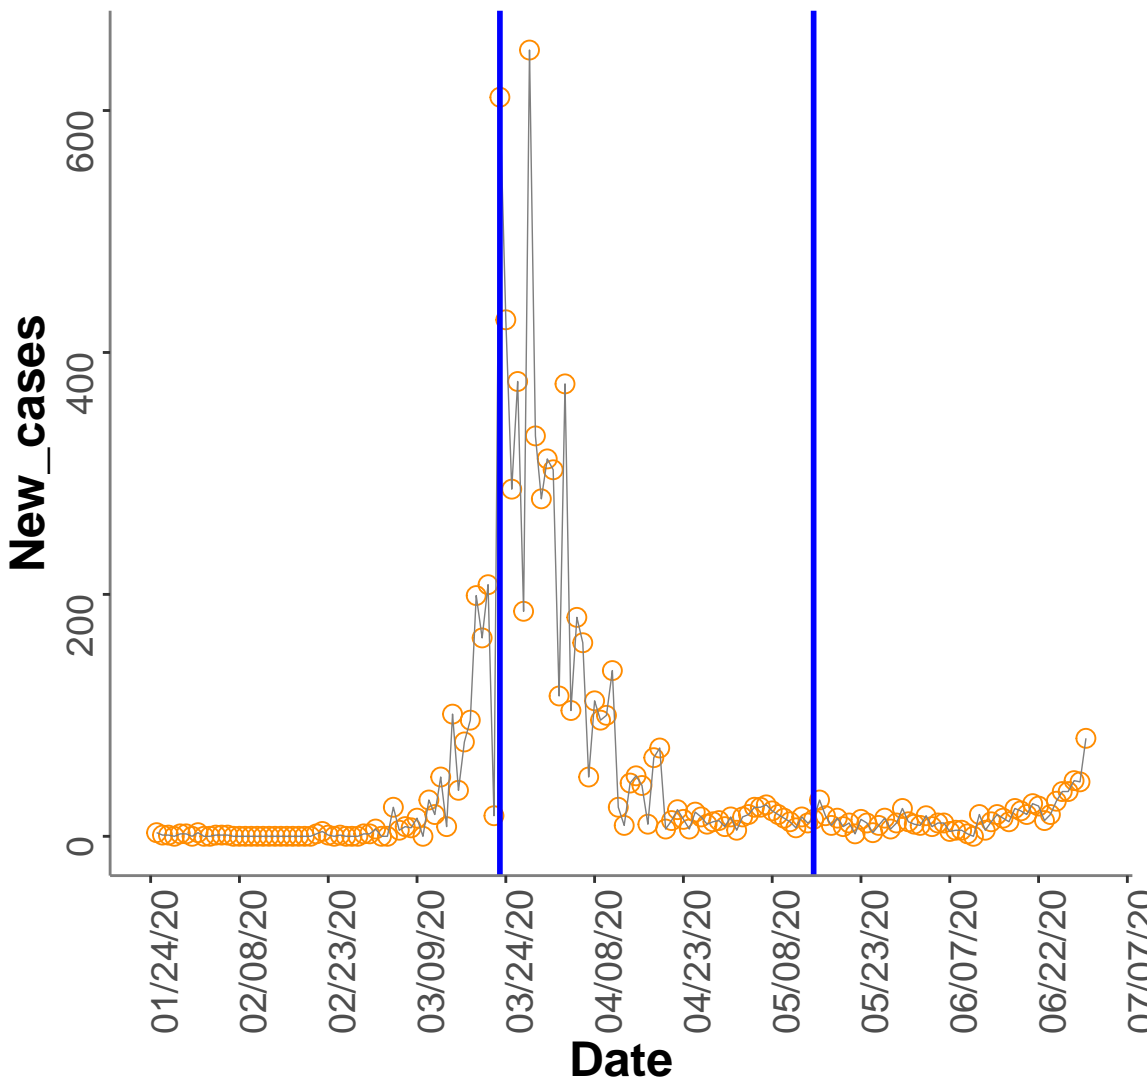

lockdown\_New\_cases\_Austria

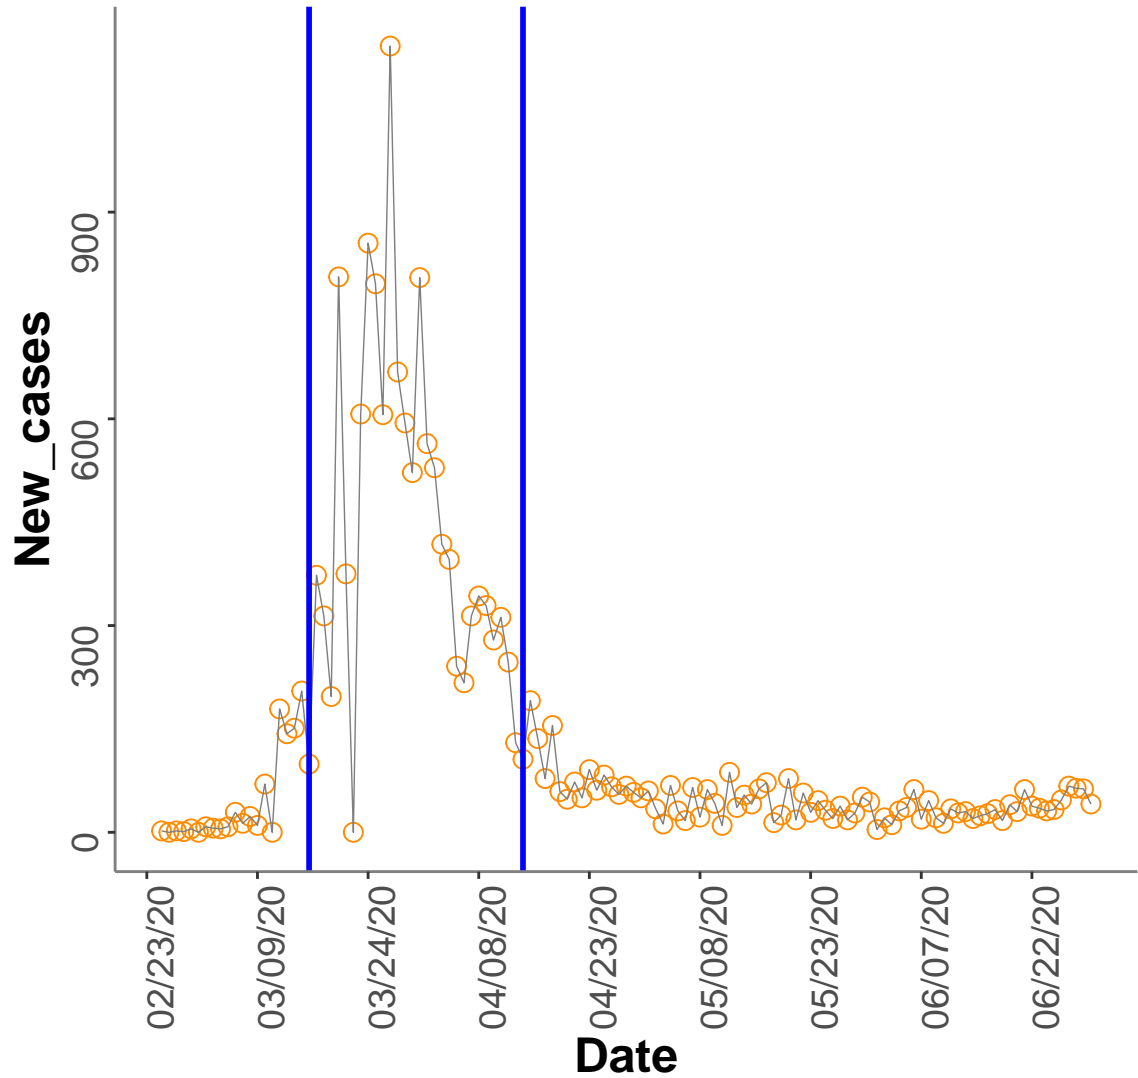



lockdown\_New\_cases\_Azerbaijan

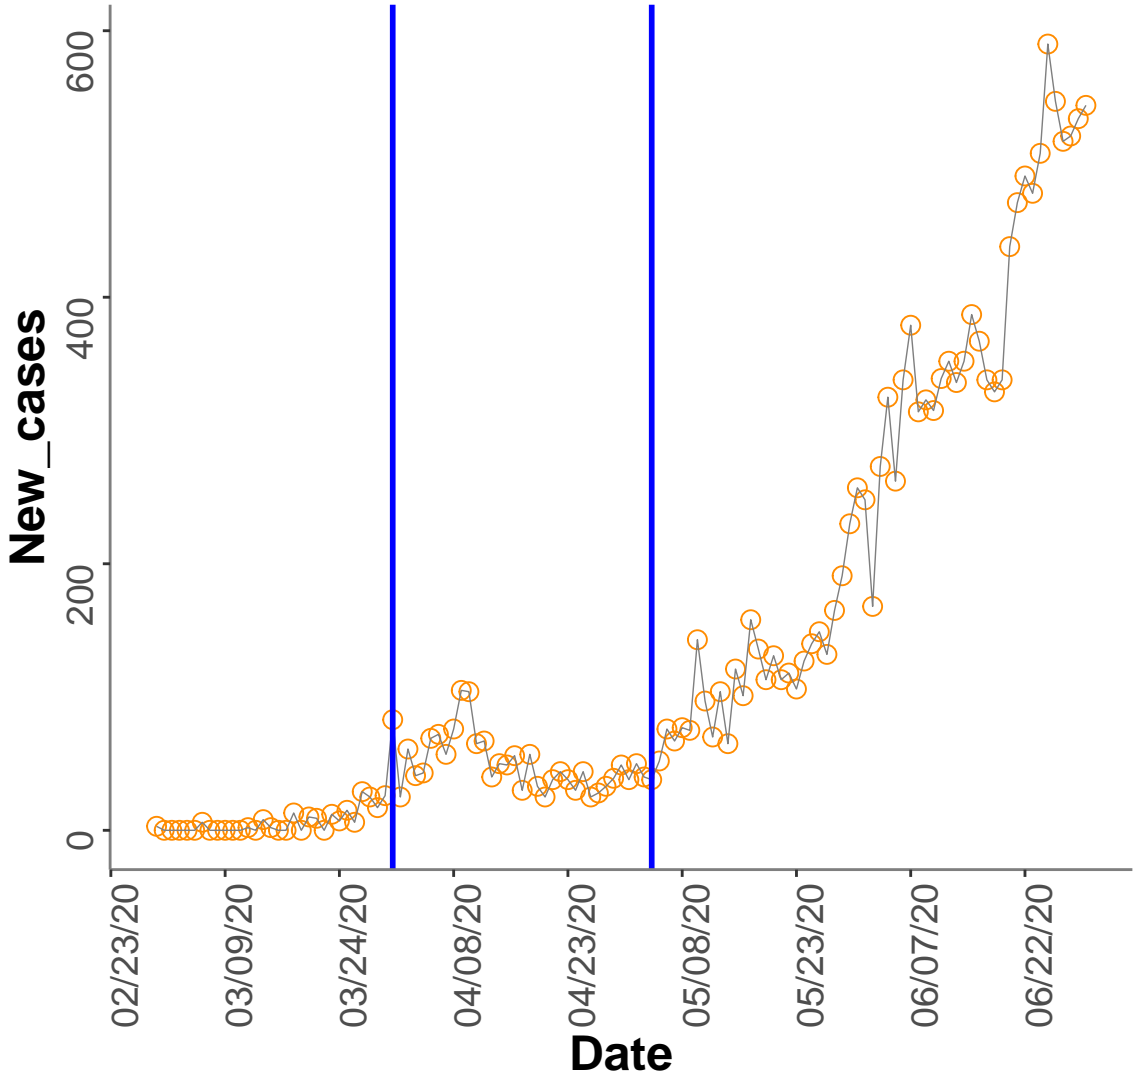

lockdown\_New\_cases\_Bangladesh

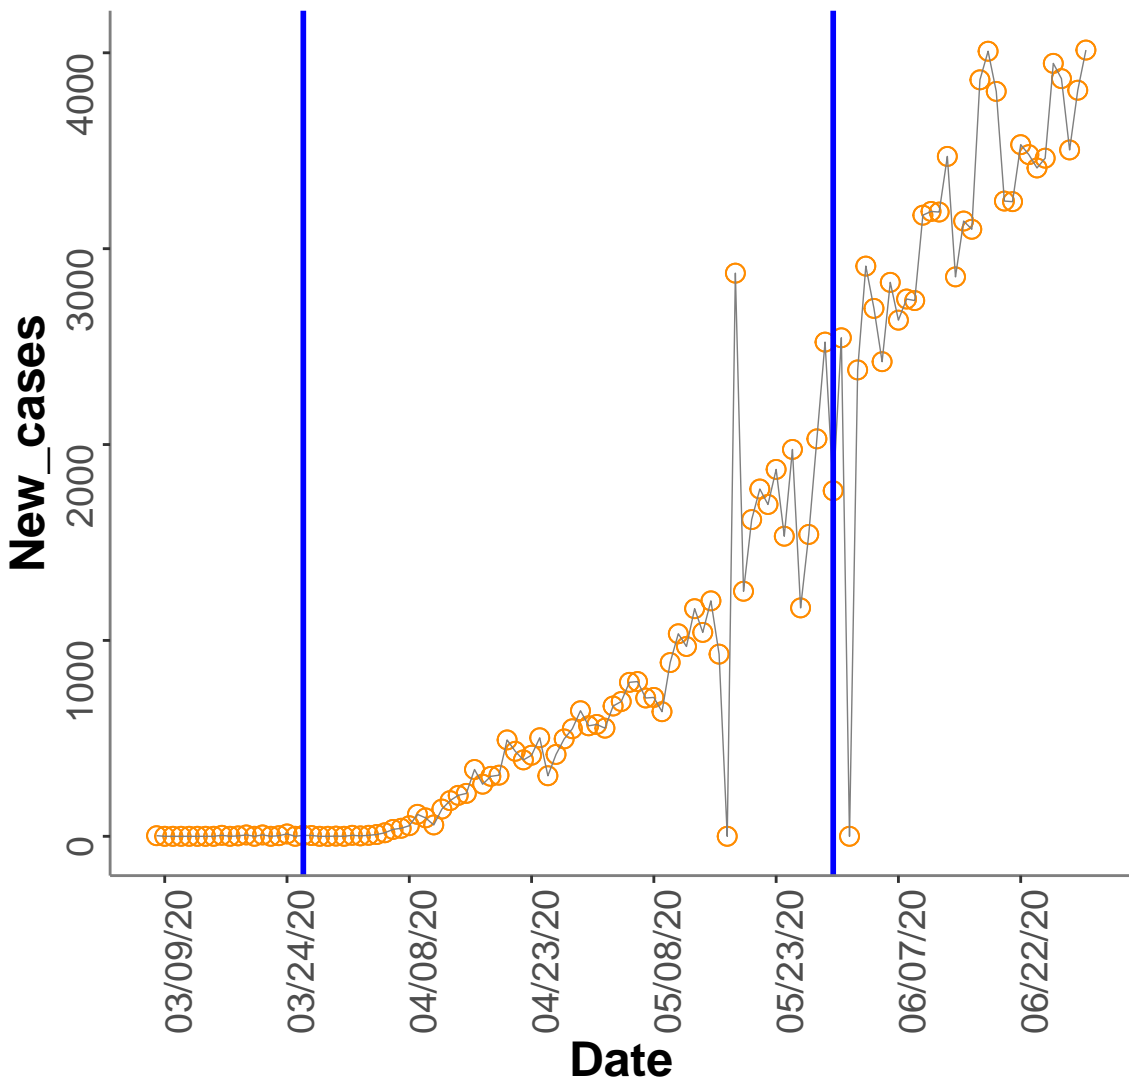

lockdown\_New\_cases\_Belarus

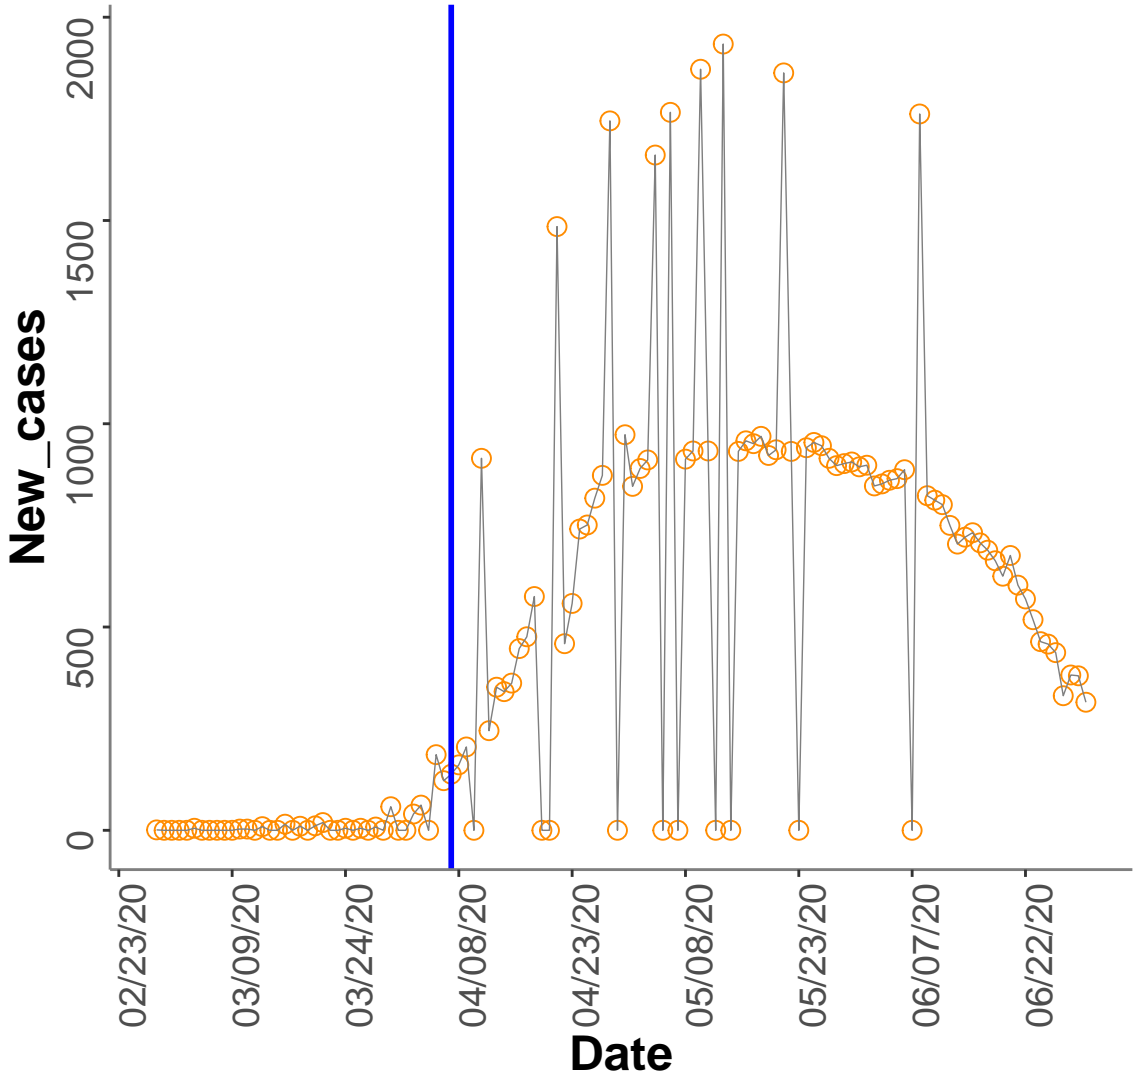

lockdown\_New\_cases\_Belgium

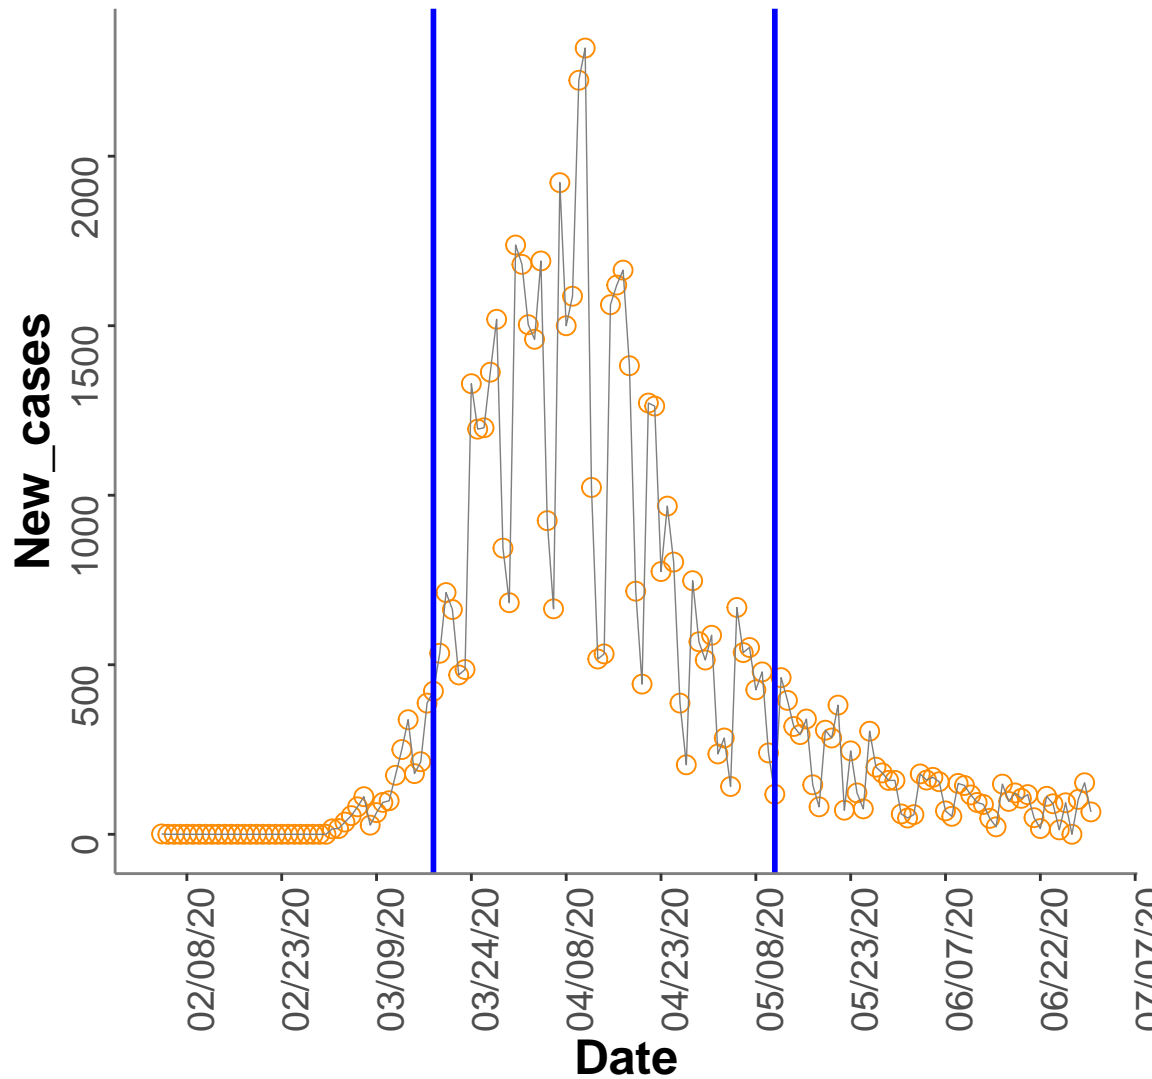

lockdown\_New\_cases\_Bermuda

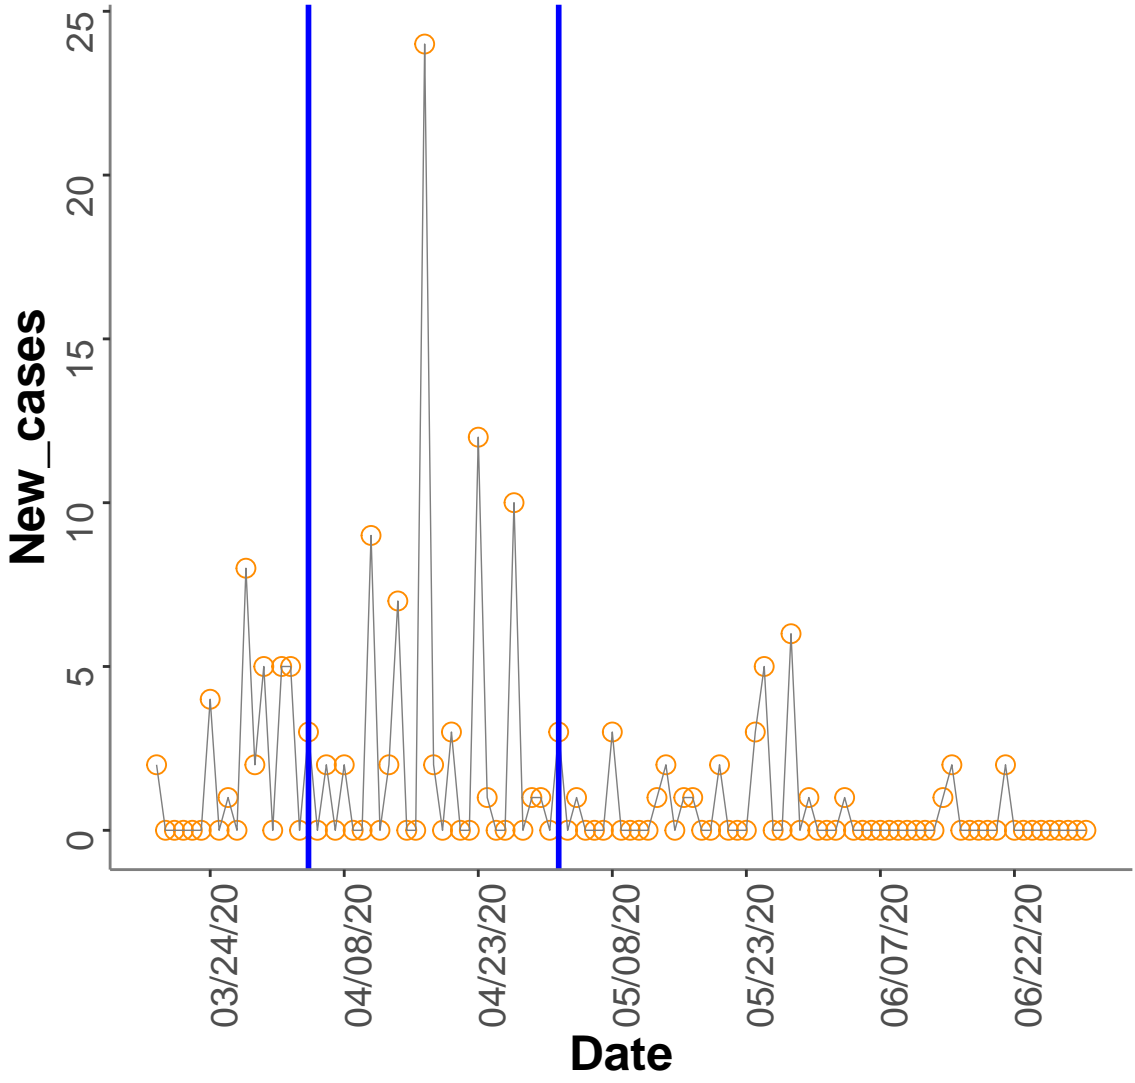

lockdown\_New\_cases\_Bolivia

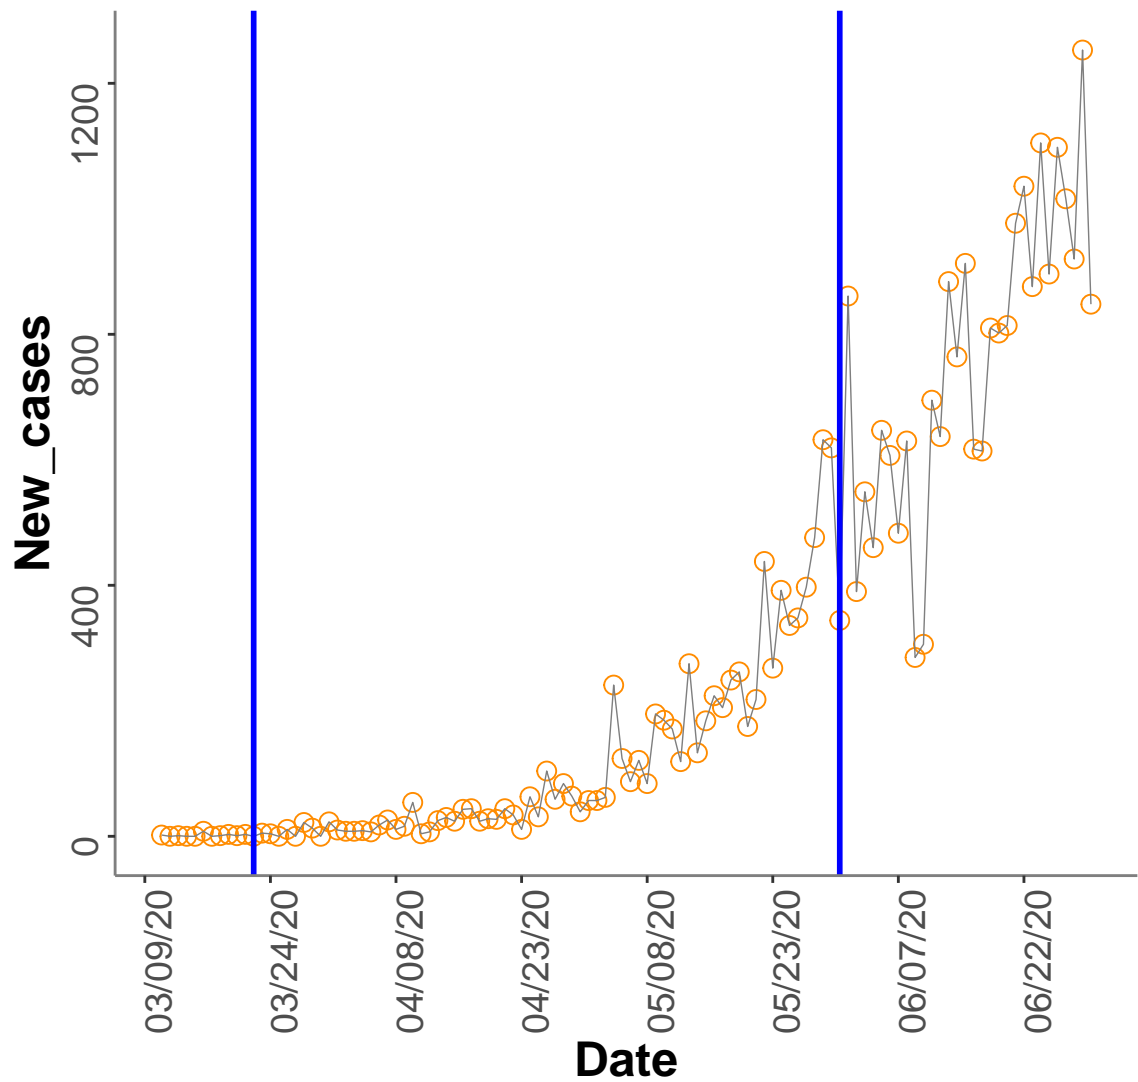

lockdown\_New\_cases\_Botswana

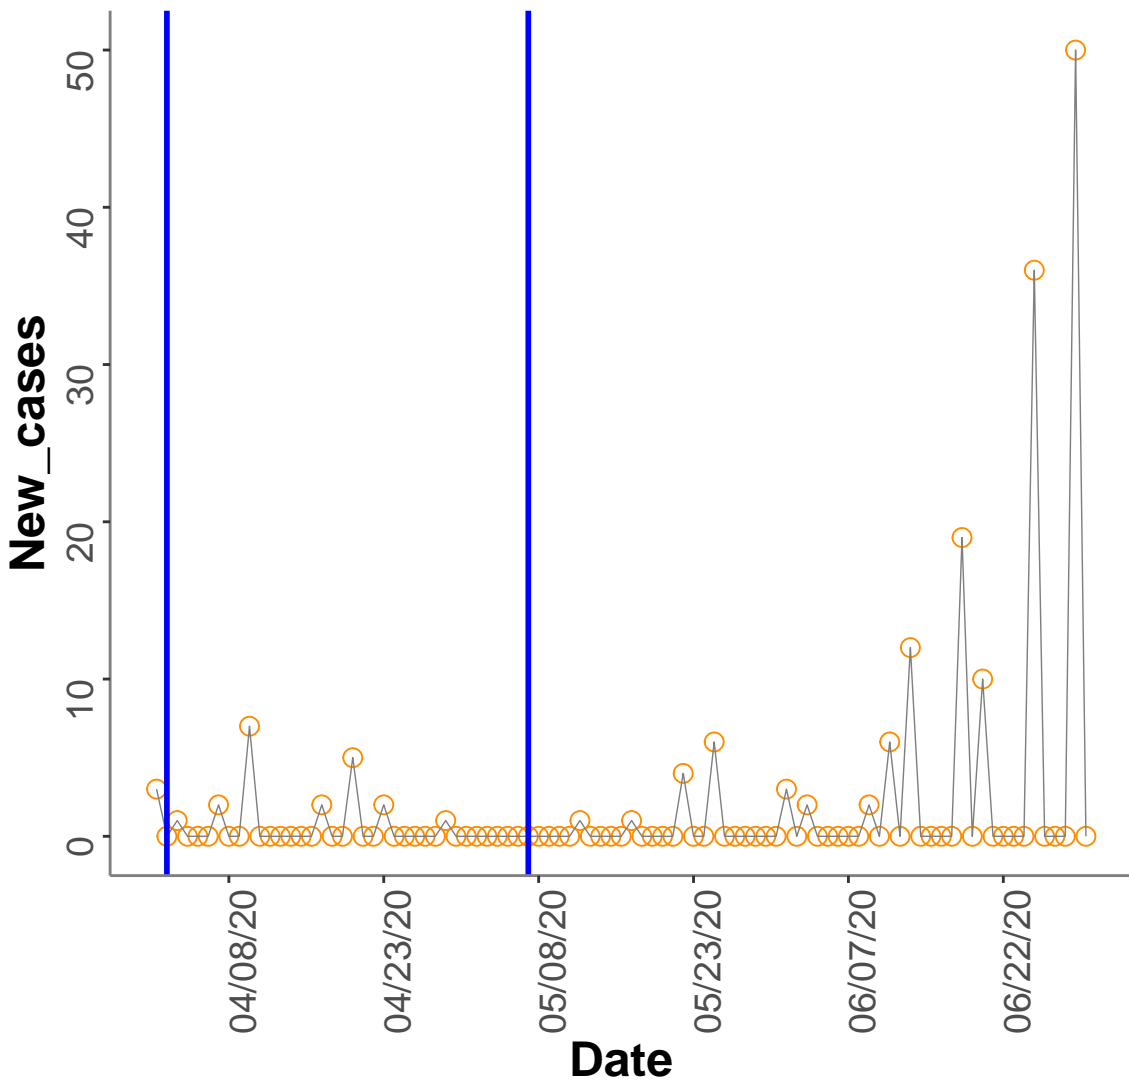

lockdown\_New\_cases\_Brazil

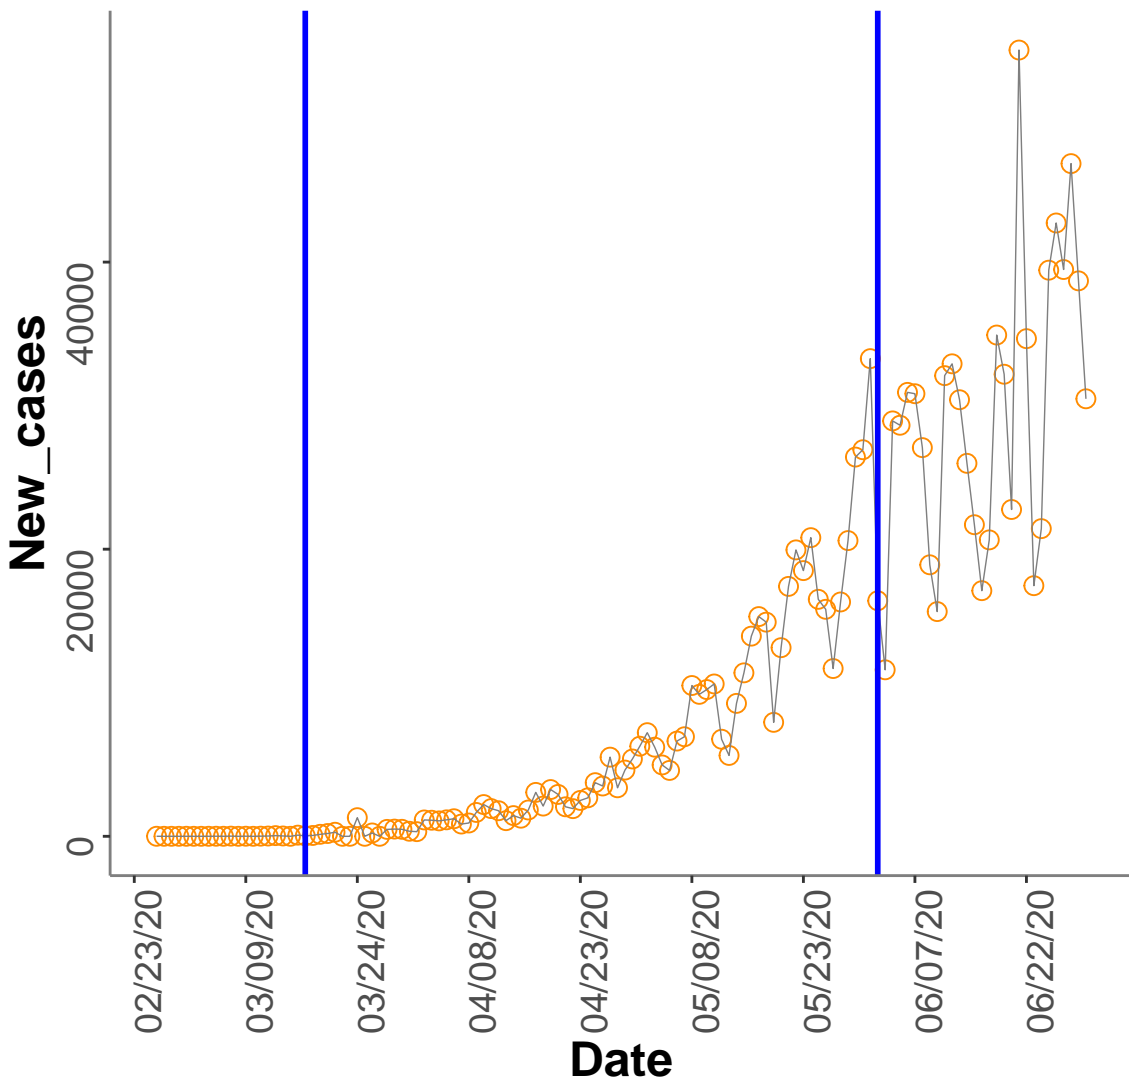



lockdown\_New\_cases\_Bulgaria

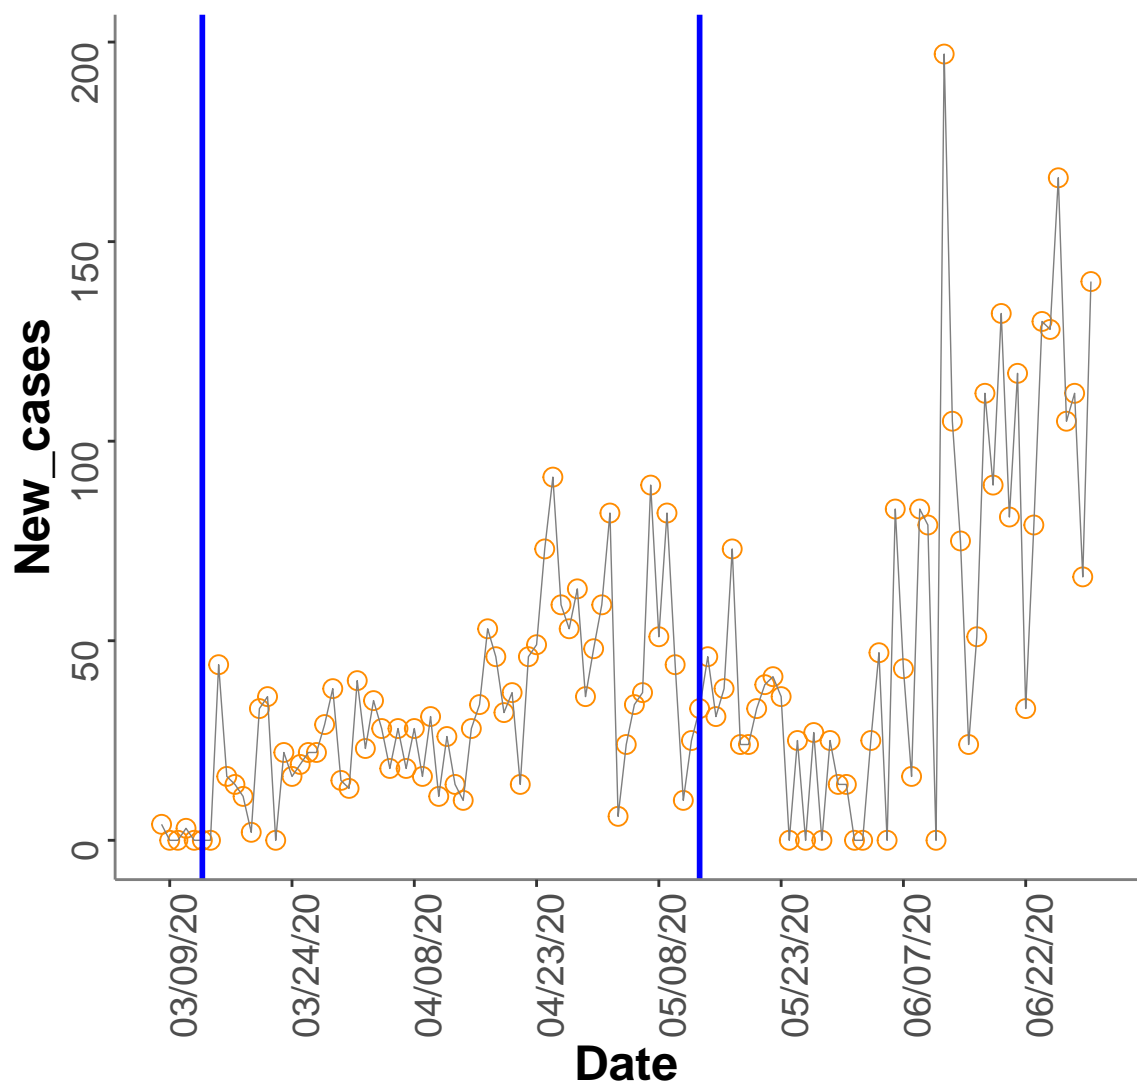

lockdown\_New\_cases\_Cameroon

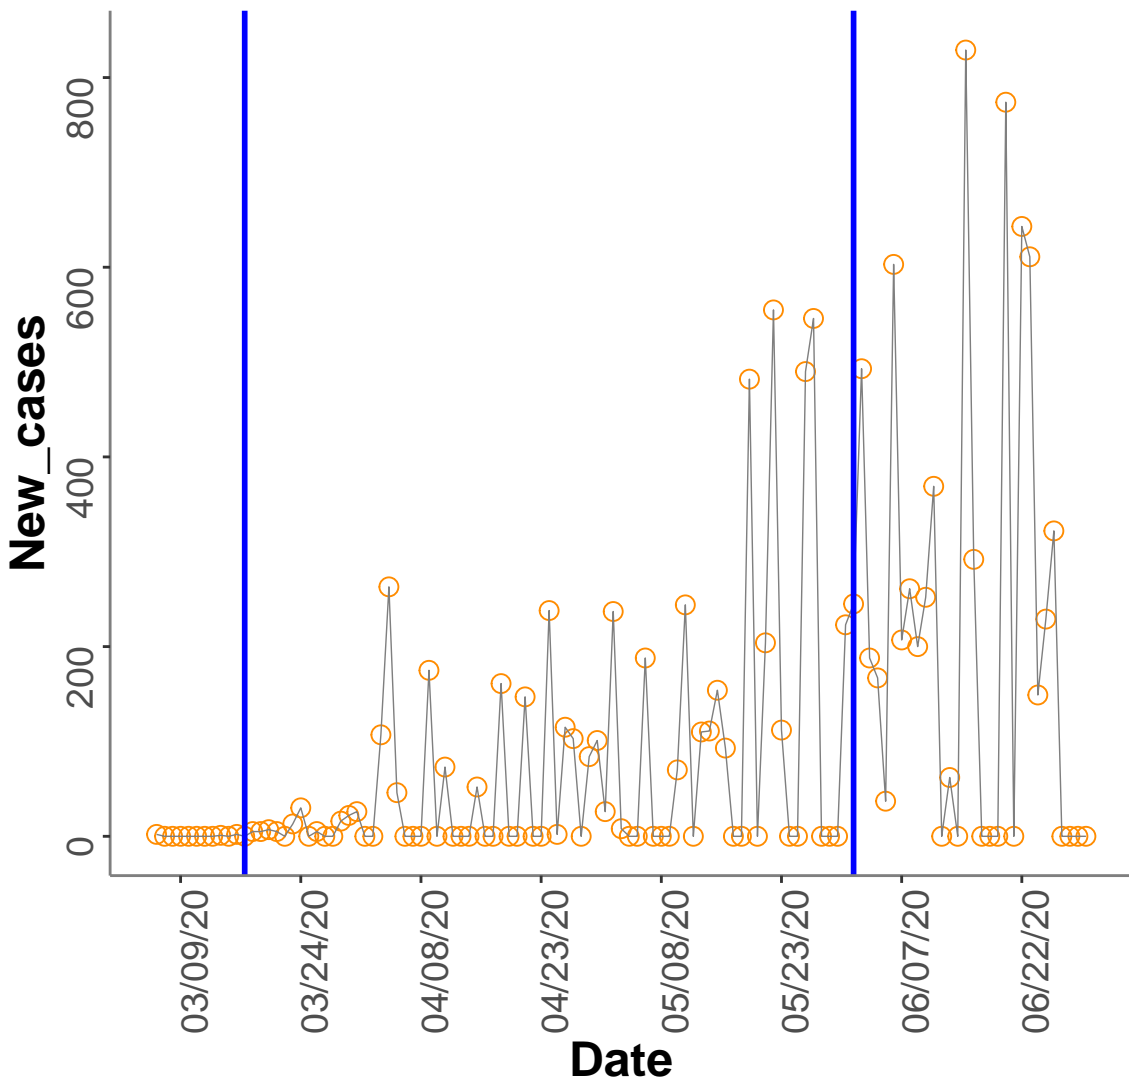

lockdown\_New\_cases\_Canada

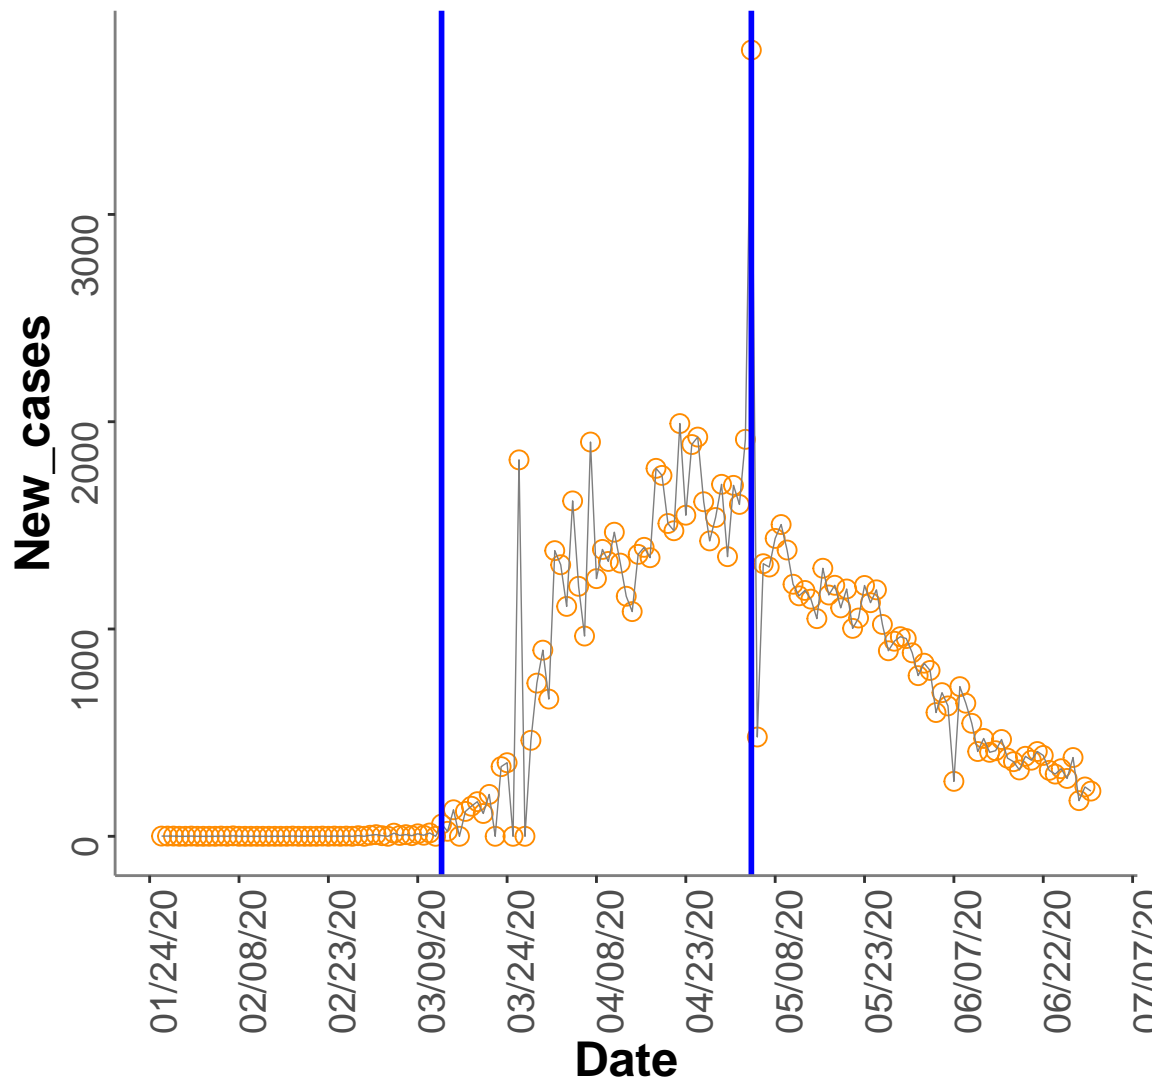

lockdown\_New\_cases\_Chad

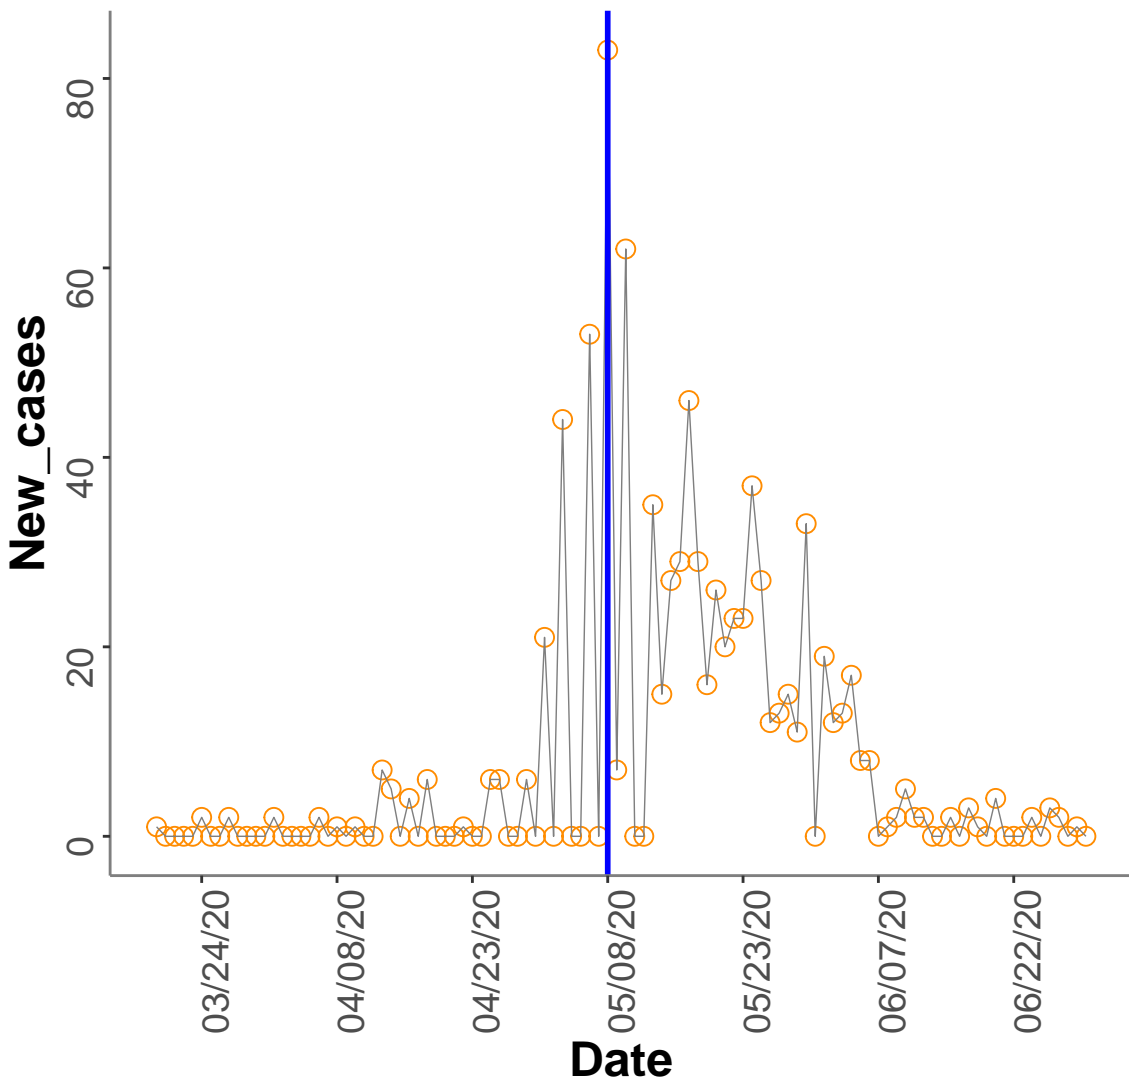

lockdown\_New\_cases\_Chile

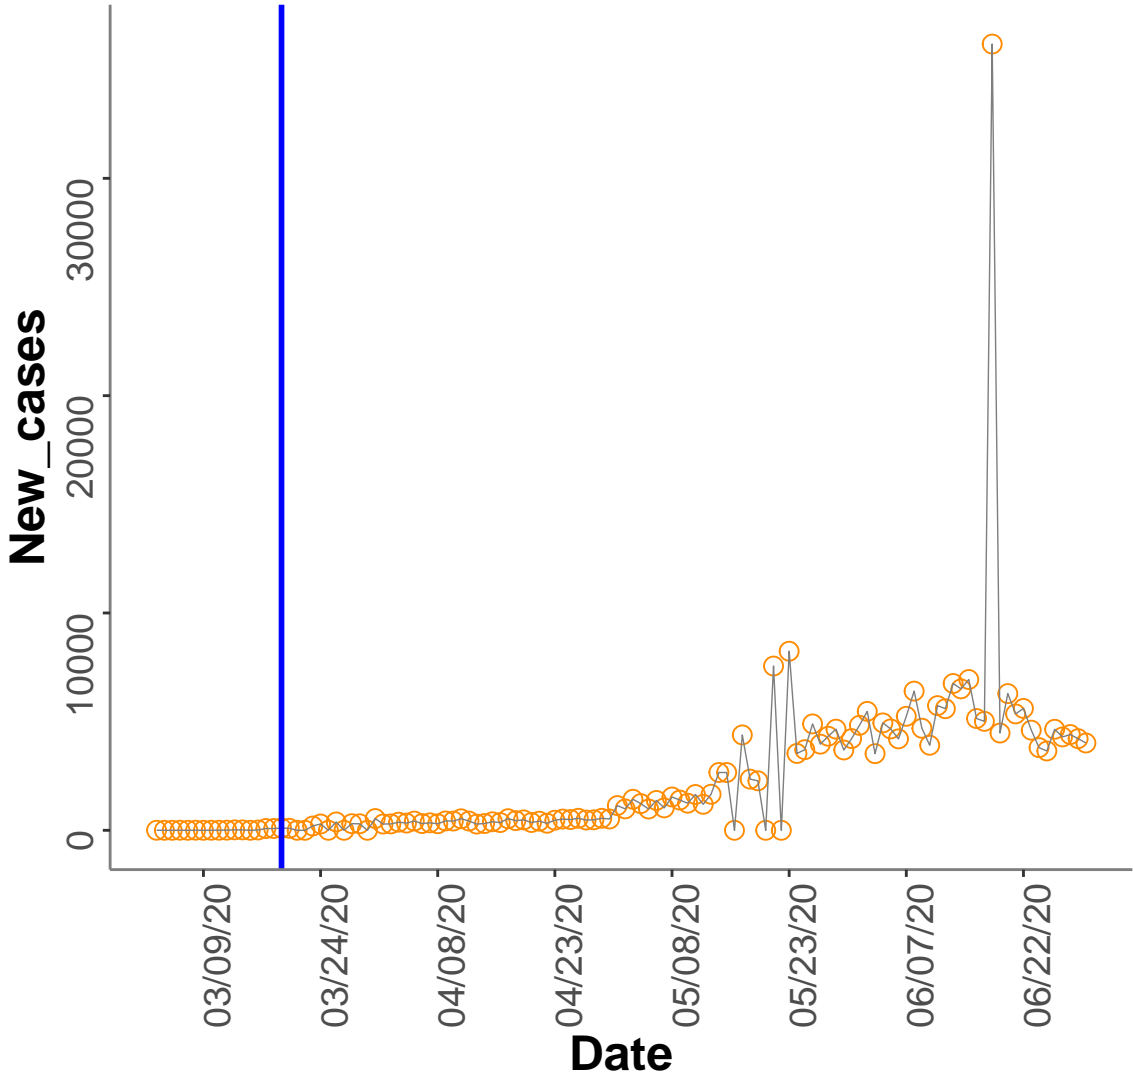

lockdown\_New\_cases\_China

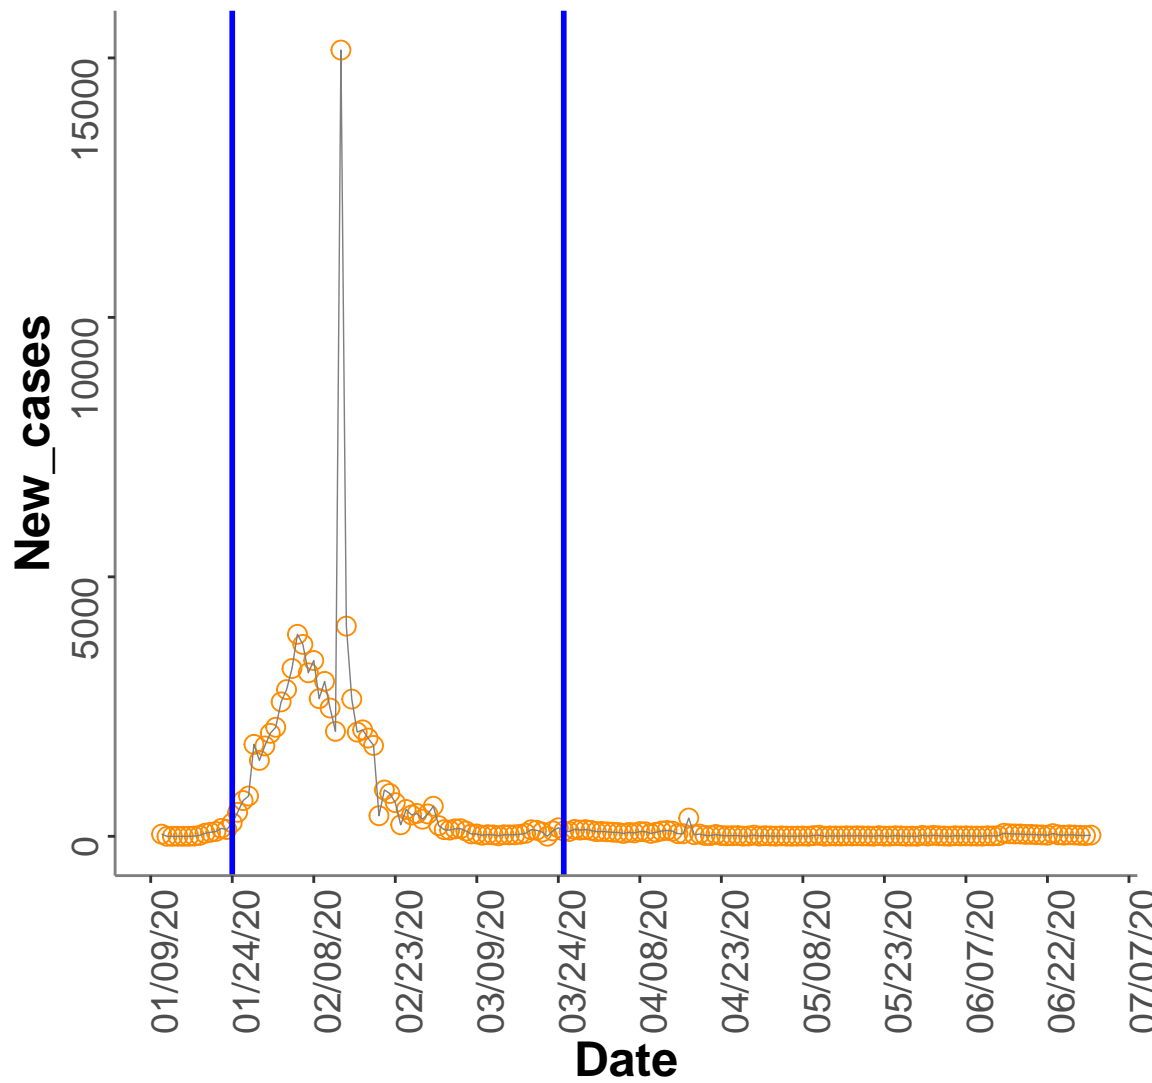

lockdown\_New\_cases\_Colombia

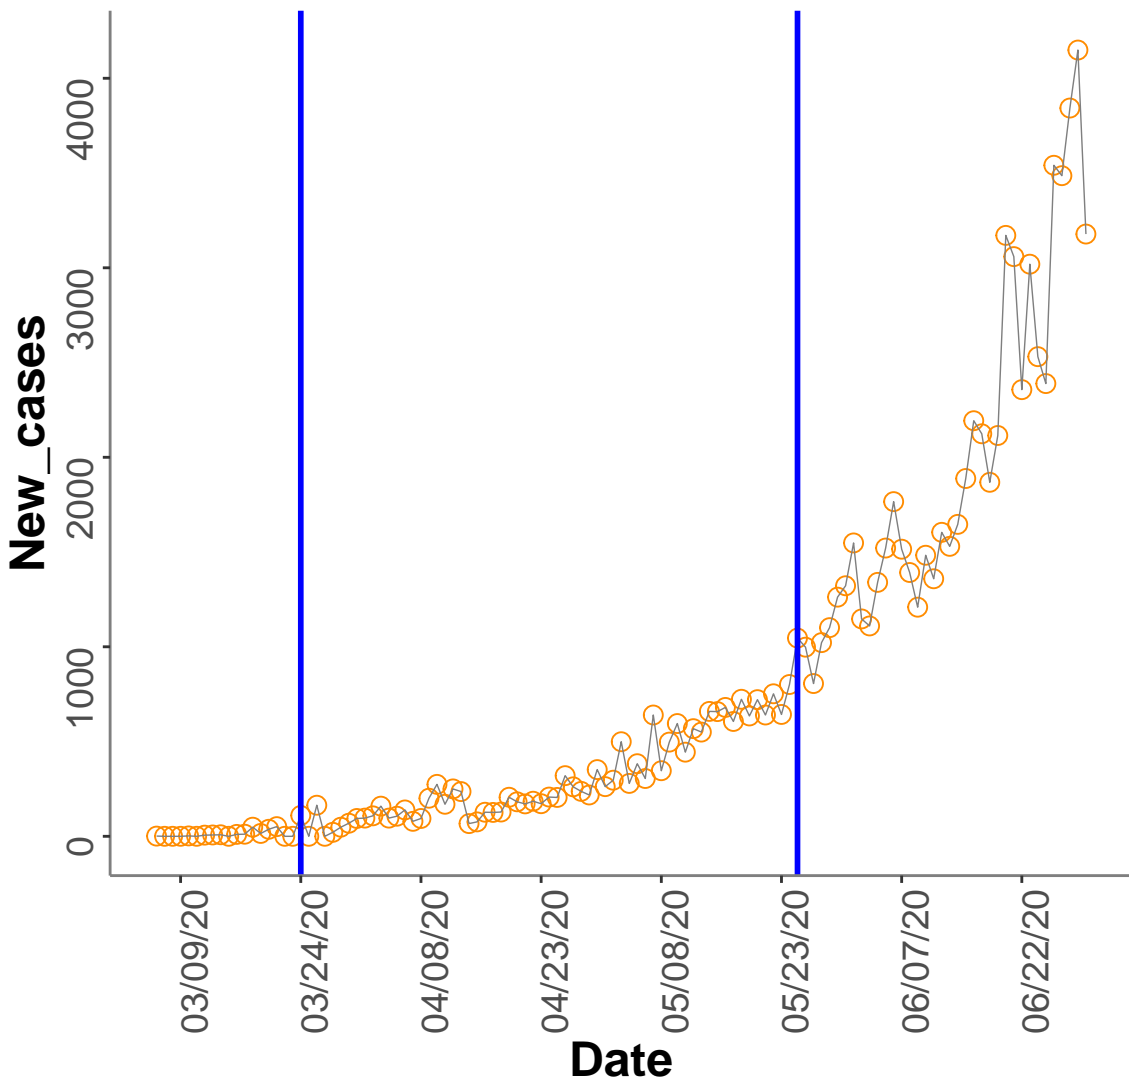

lockdown\_New\_cases\_Congo

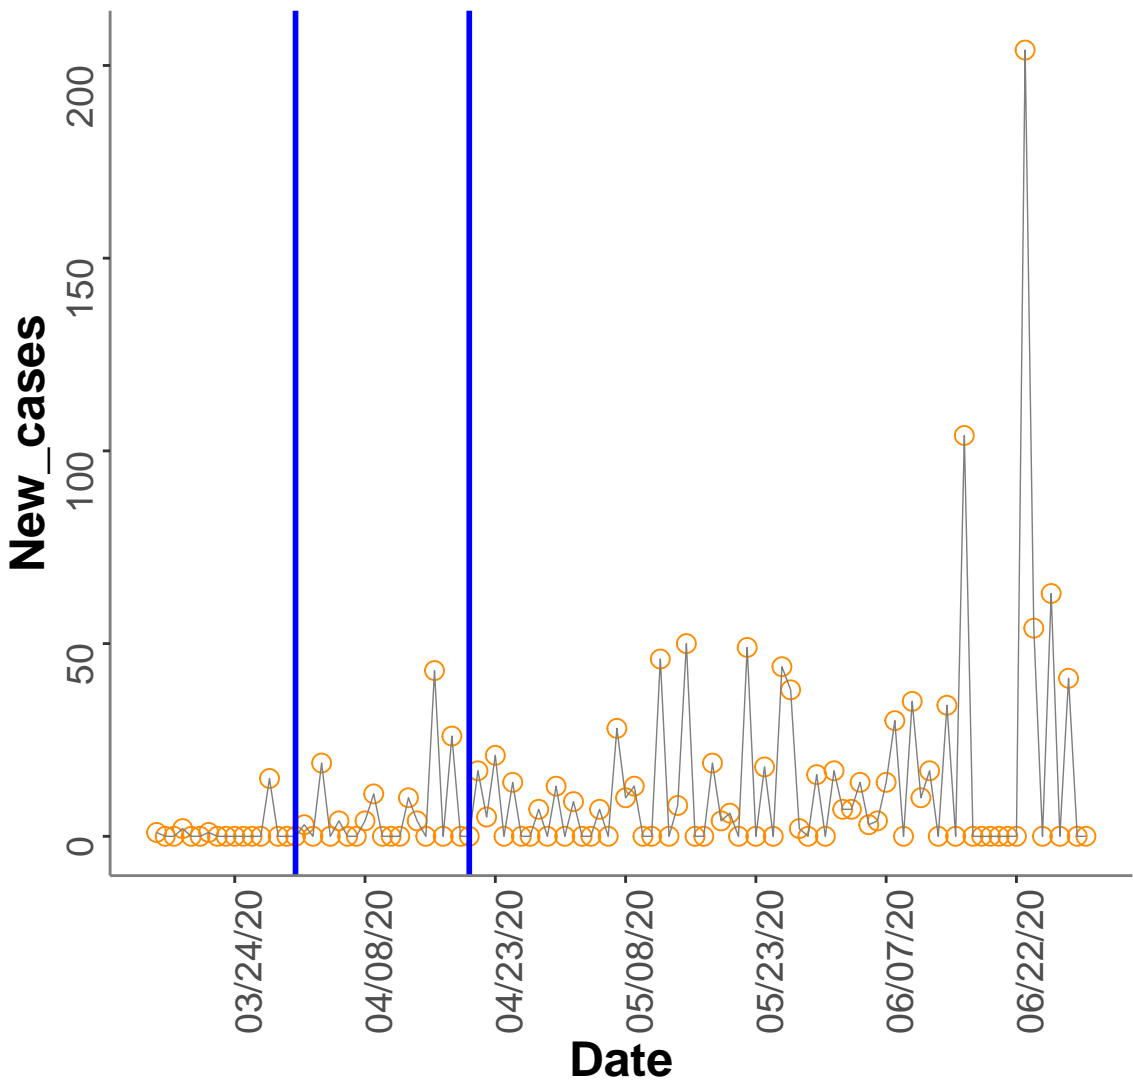



lockdown\_New\_cases\_Costa\_Rica

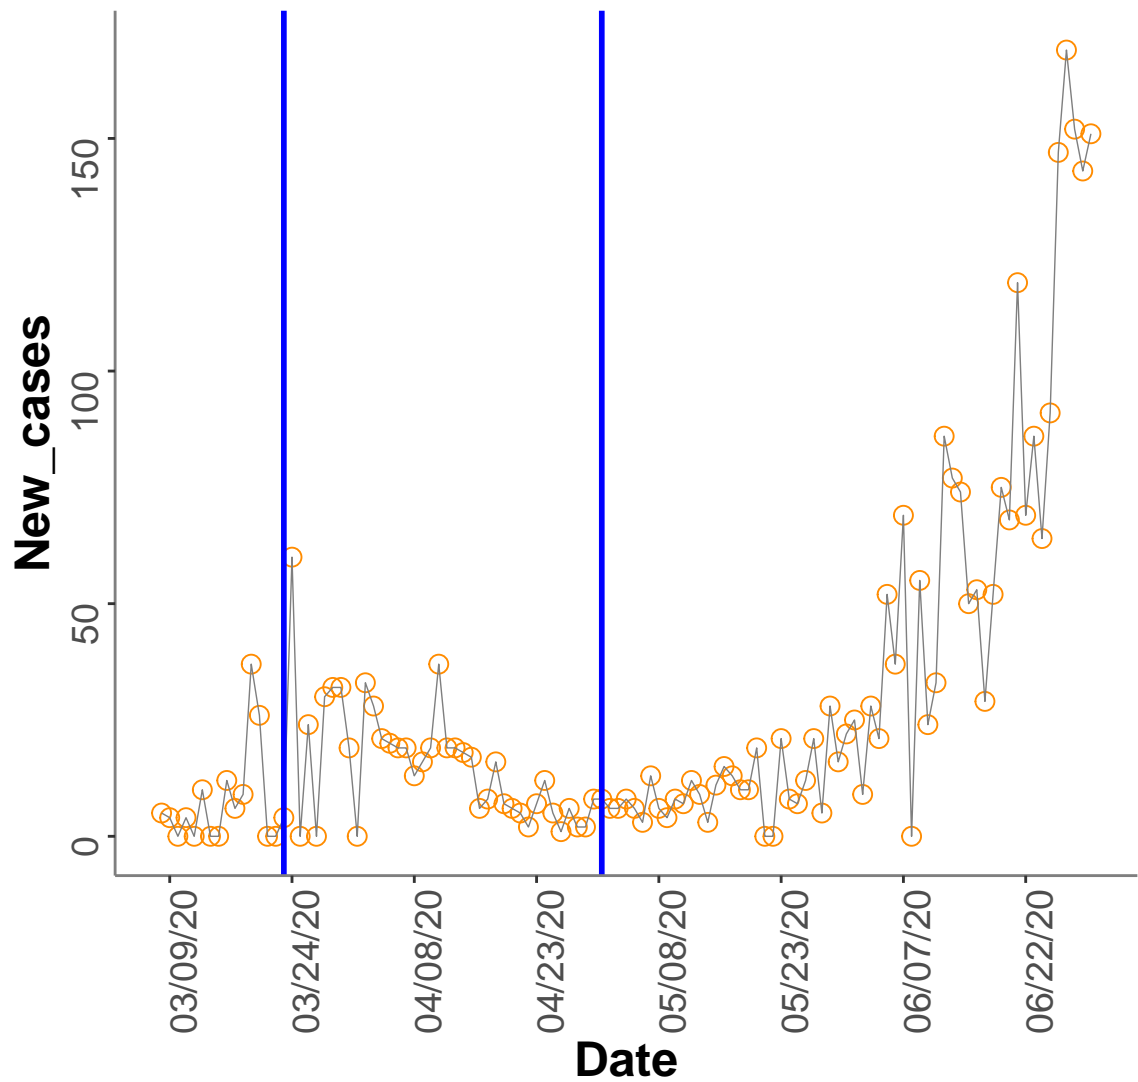

lockdown\_New\_cases\_Croatia

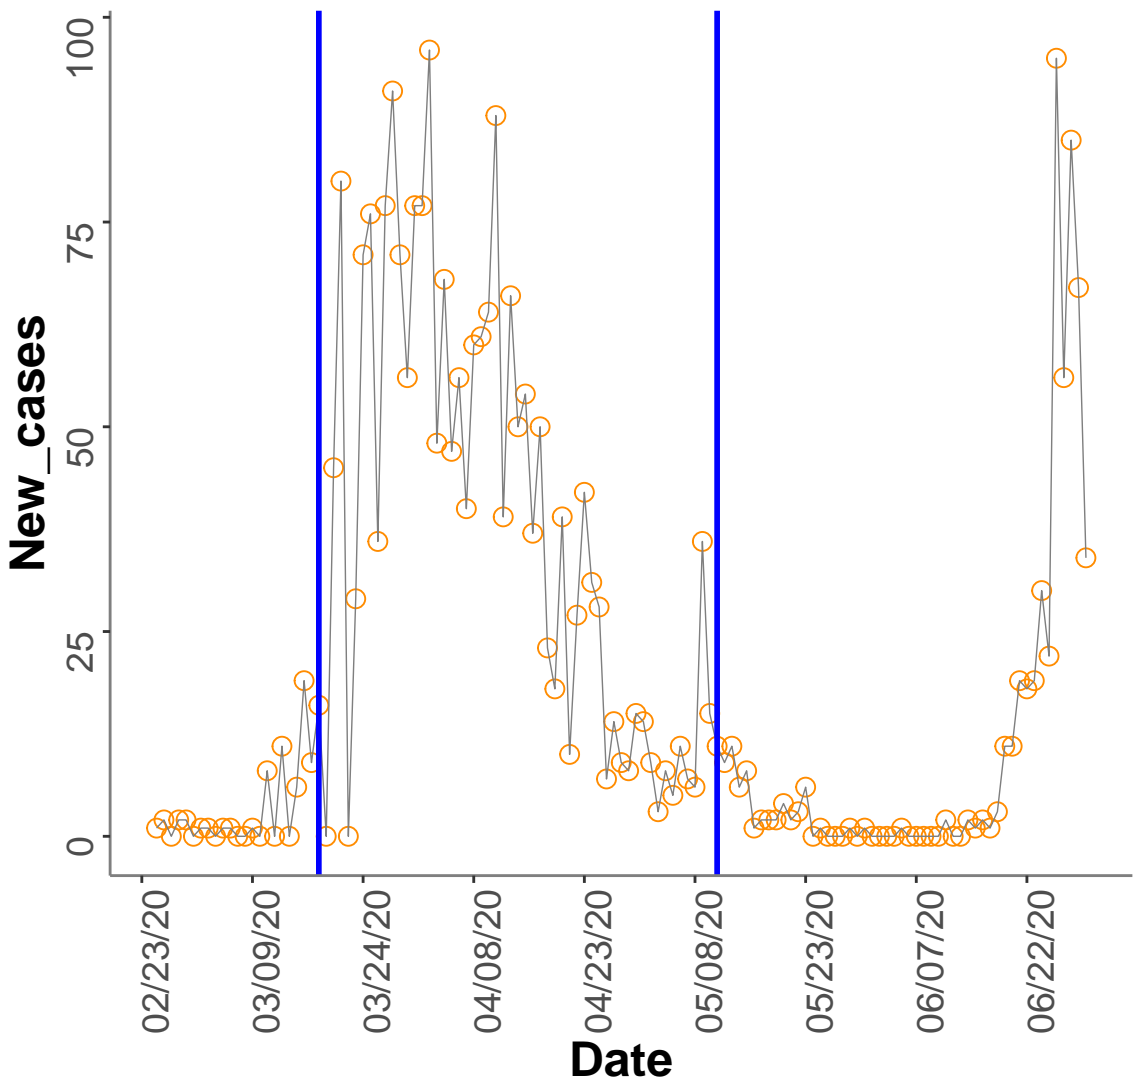

lockdown\_New\_cases\_Cuba

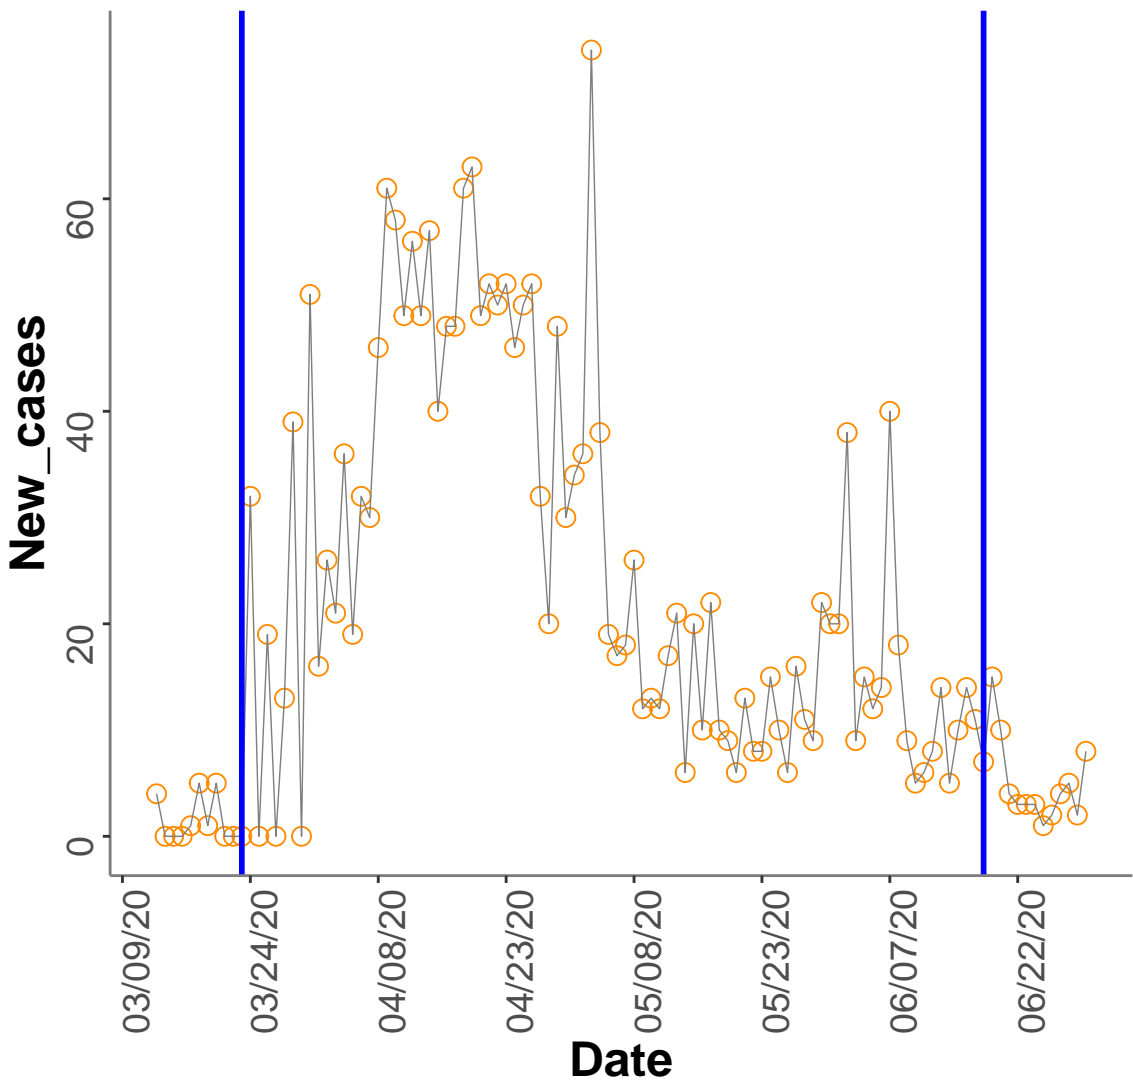

lockdown\_New\_cases\_Czech\_Republic

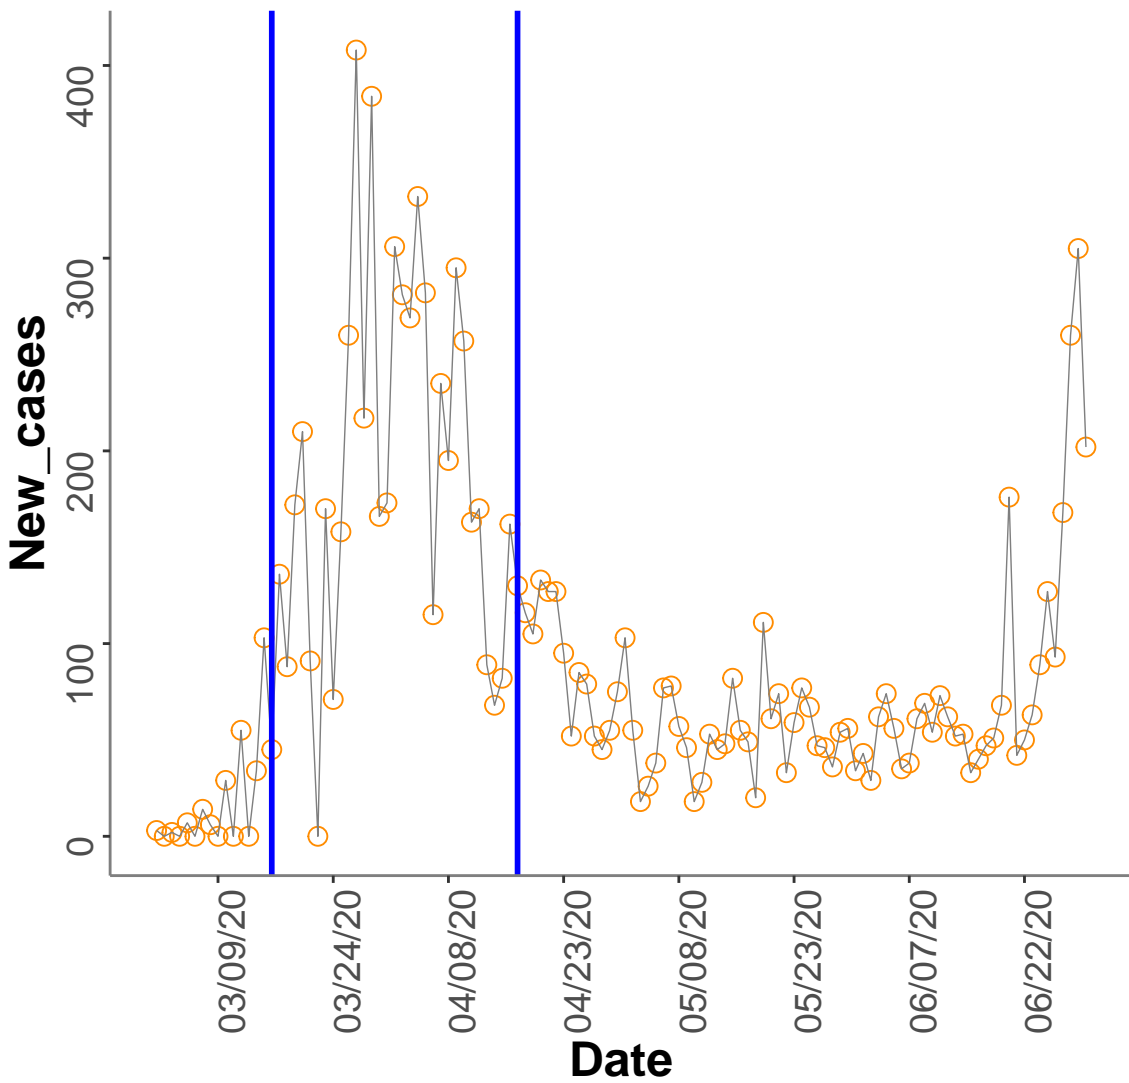

lockdown\_New\_cases\_Denmark

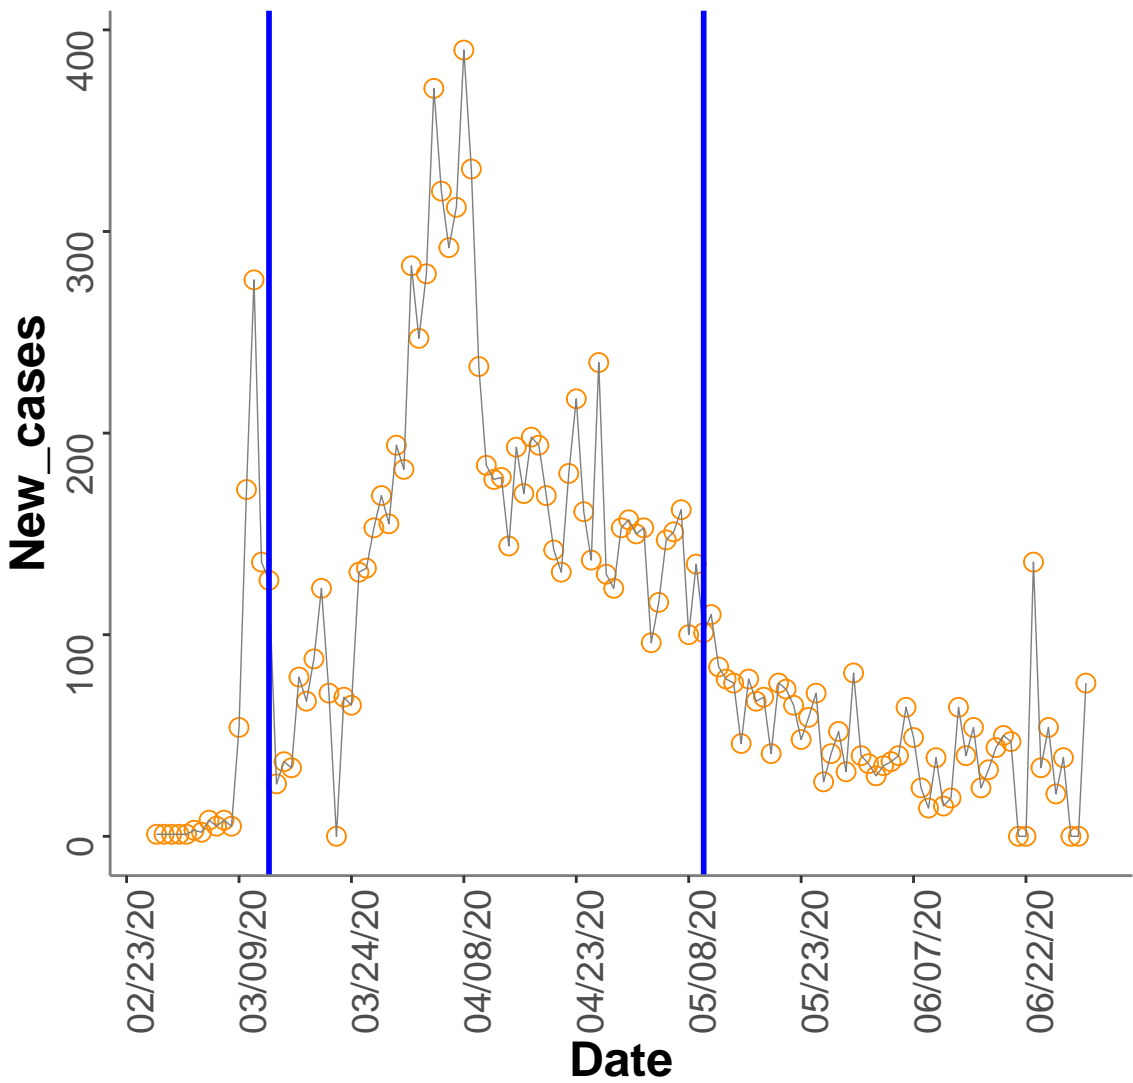

lockdown\_New\_cases\_Dominican\_Republic

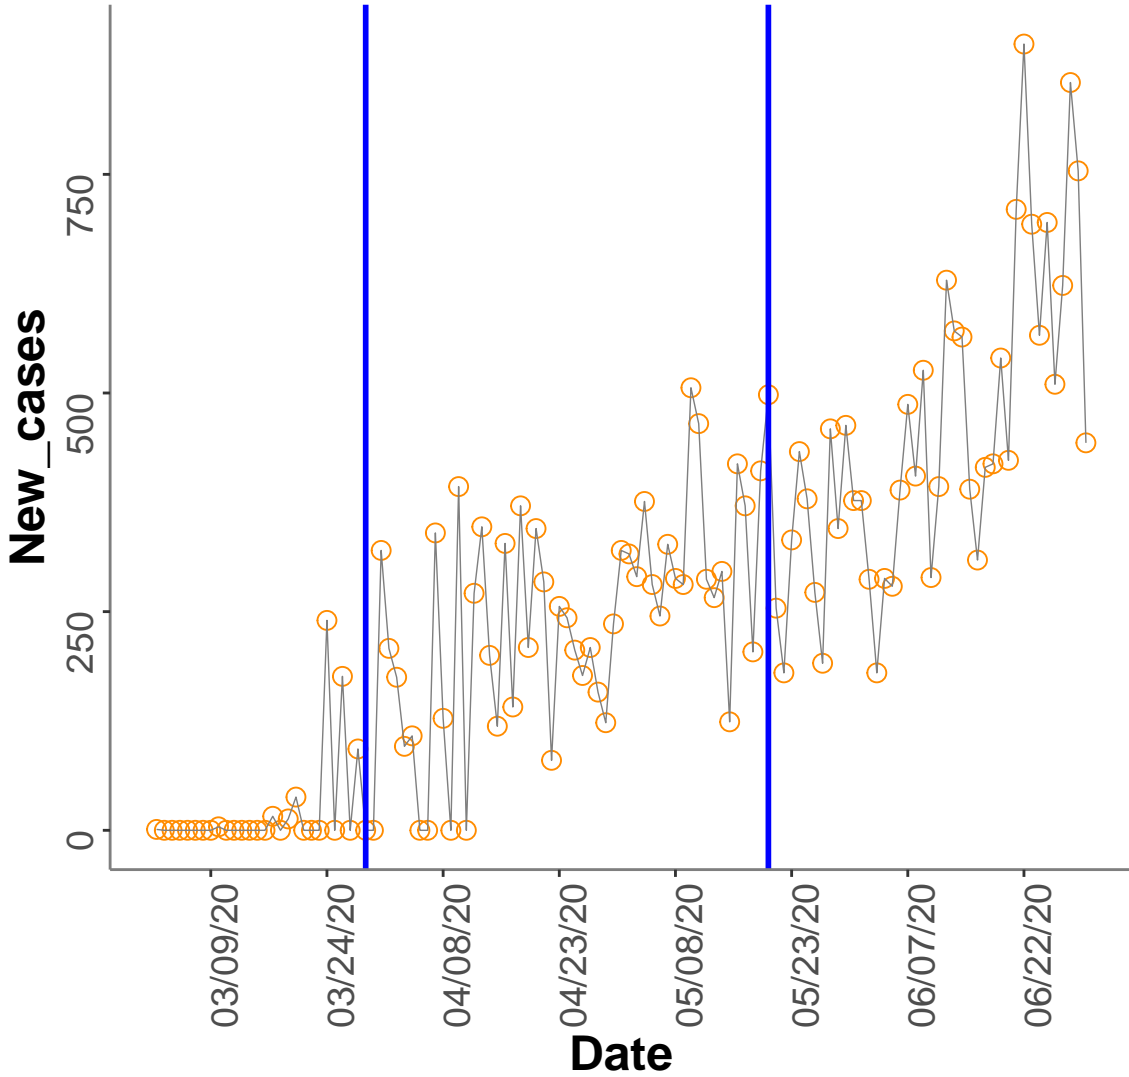

lockdown\_New\_cases\_Ecuador

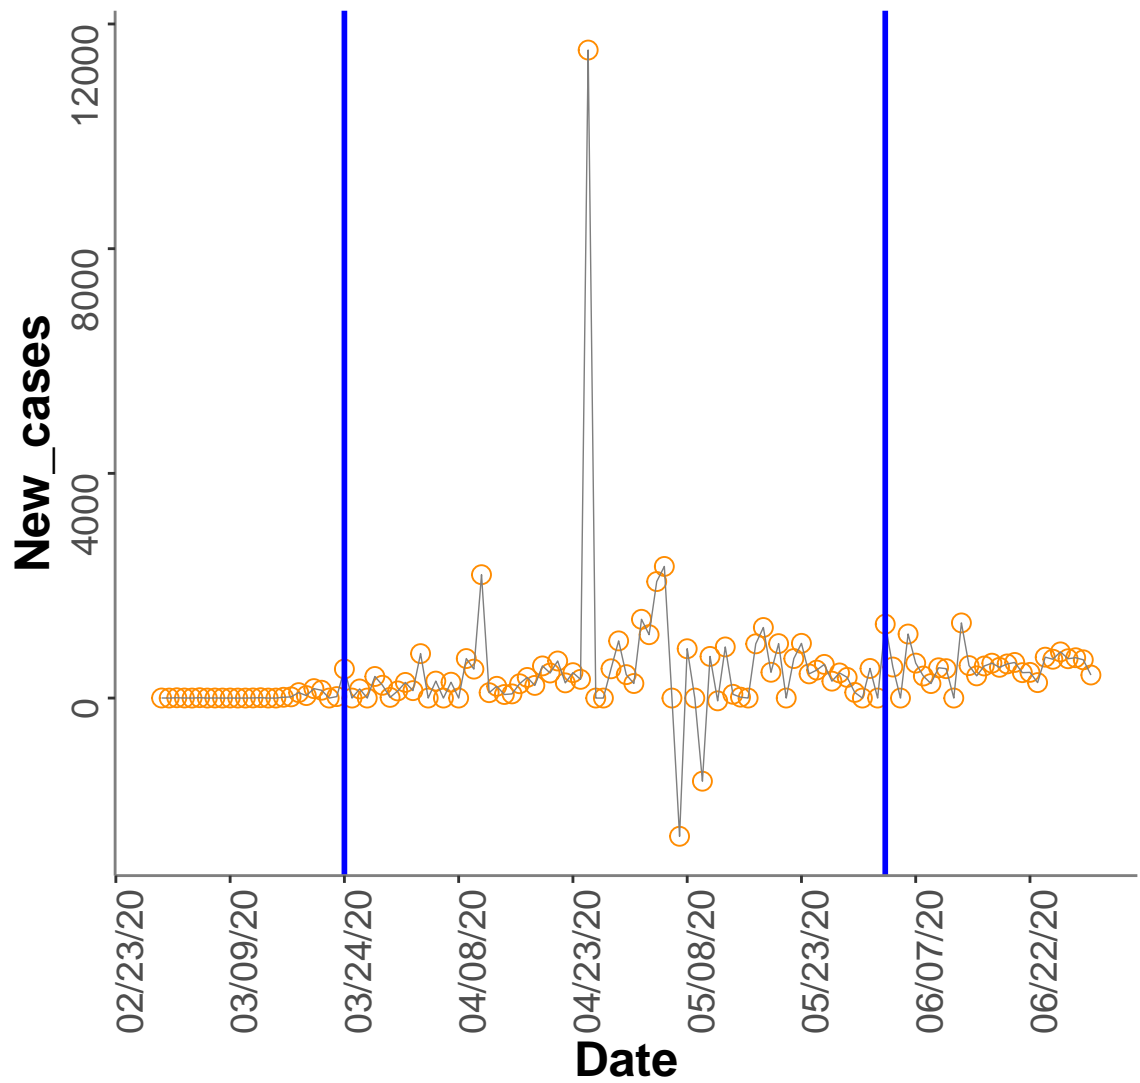

lockdown\_New\_cases\_Egypt

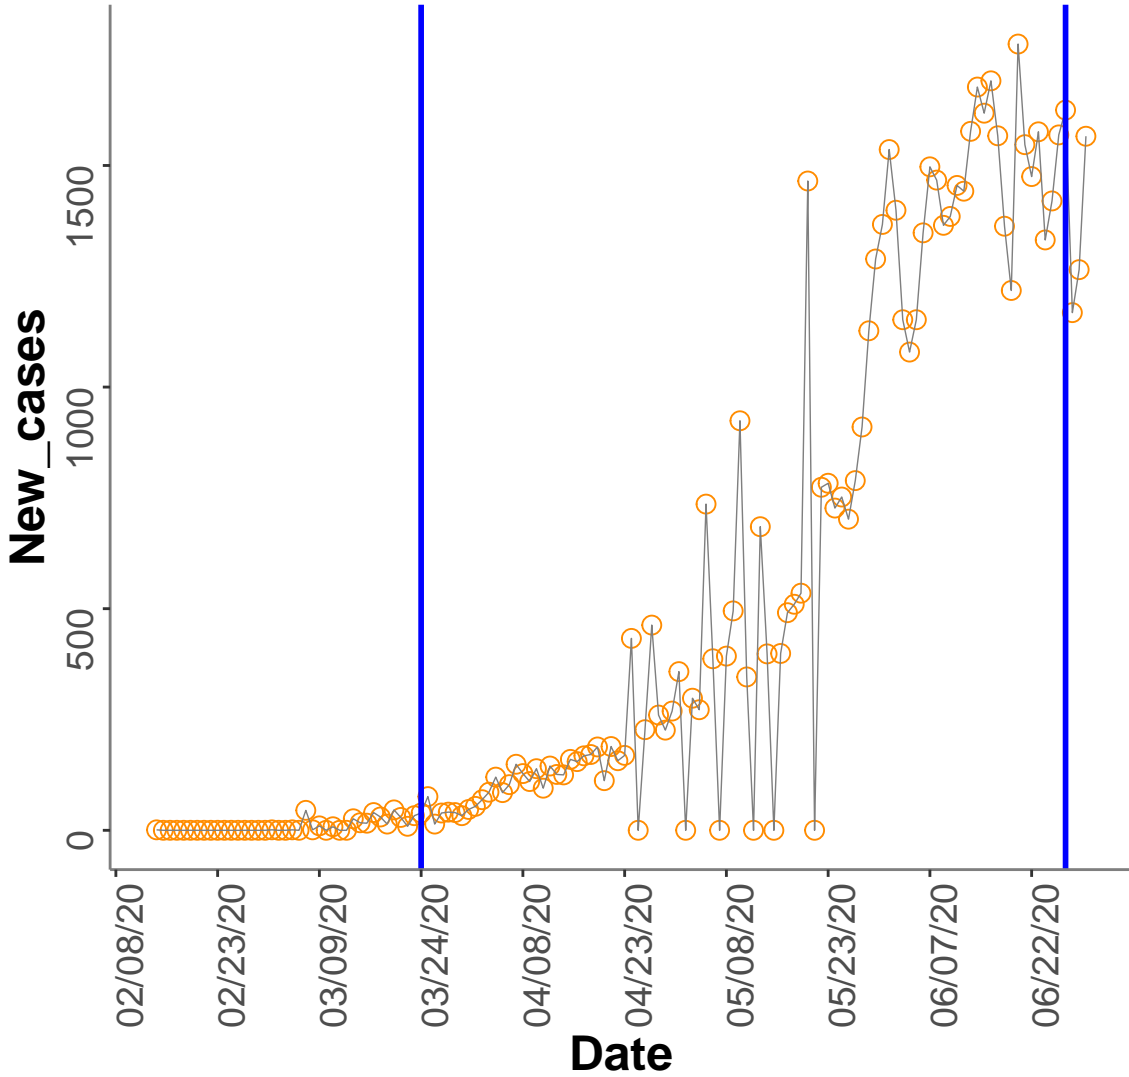



lockdown\_New\_cases\_Eritrea

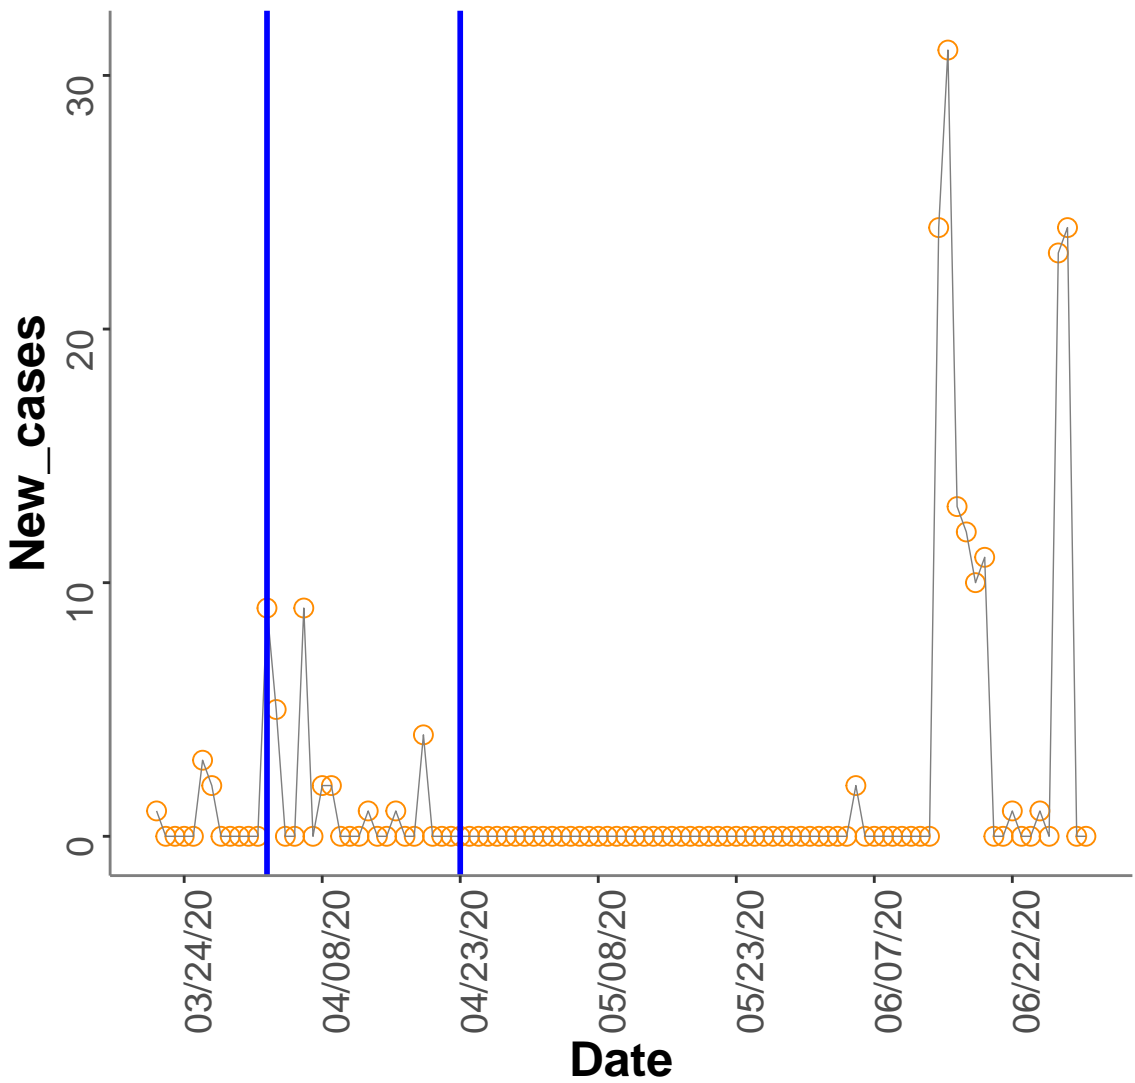

lockdown\_New\_cases\_Estonia

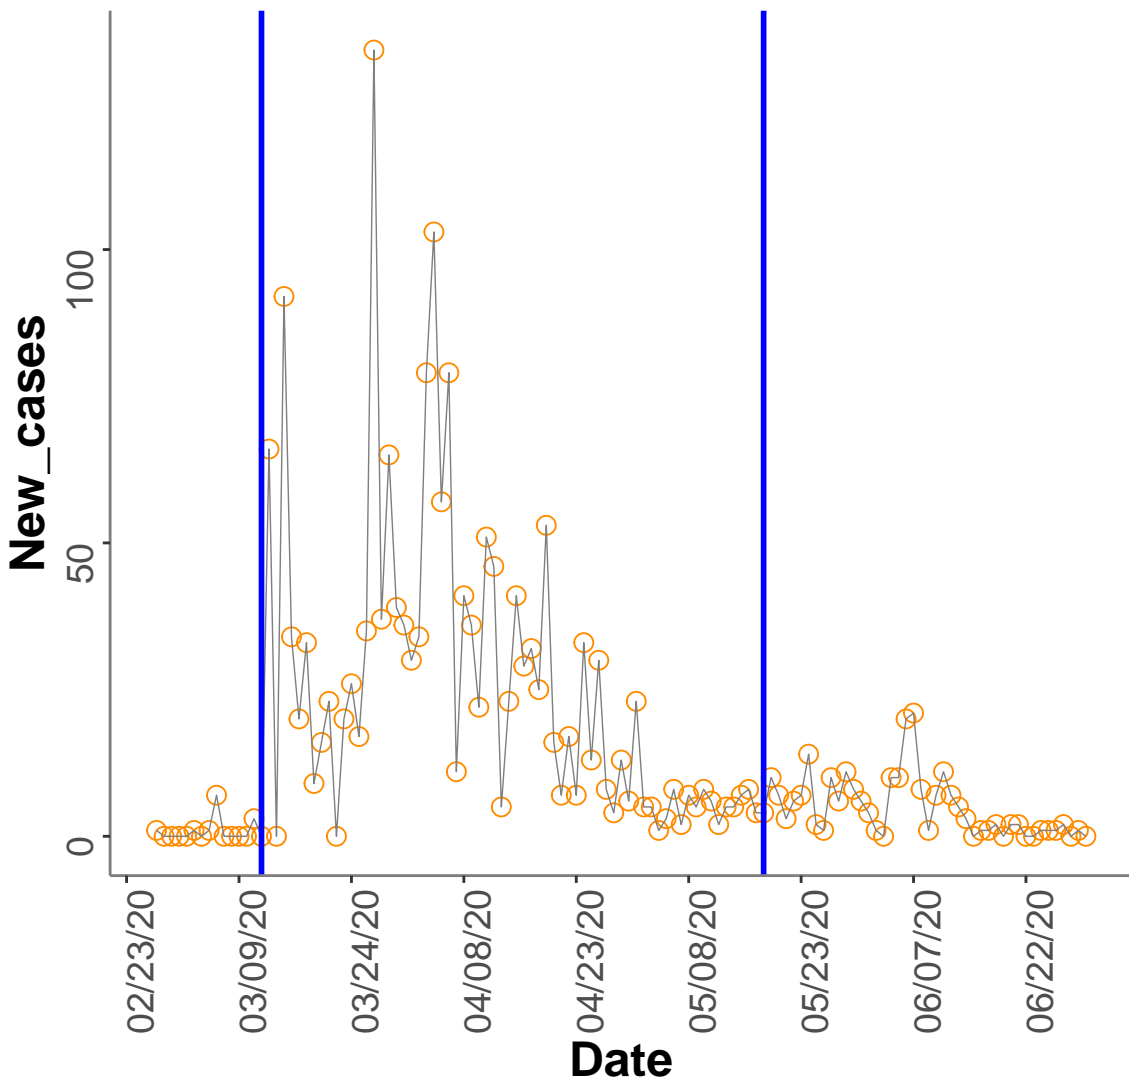

lockdown\_New\_cases\_Finland

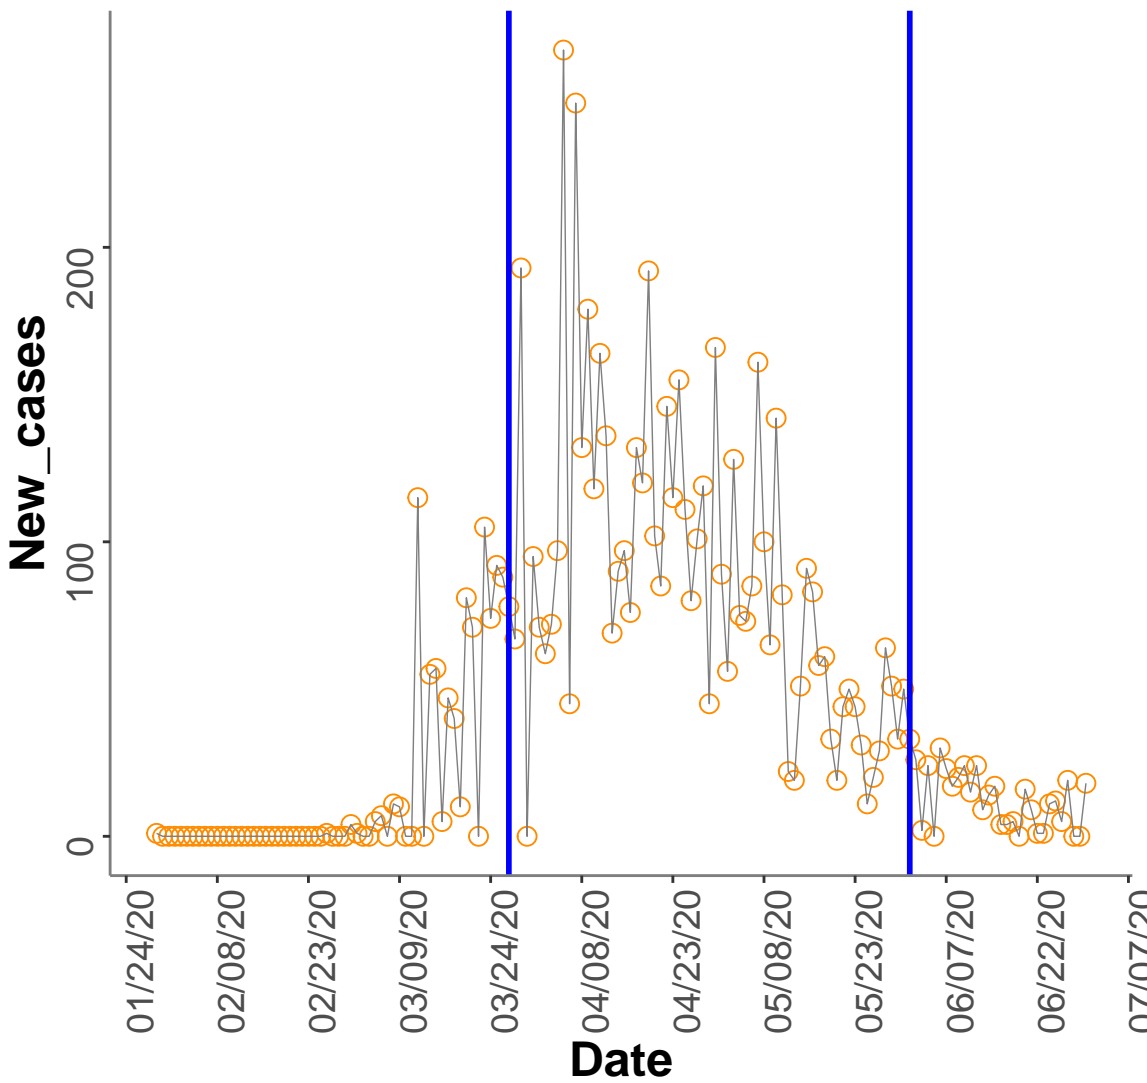

lockdown\_New\_cases\_France

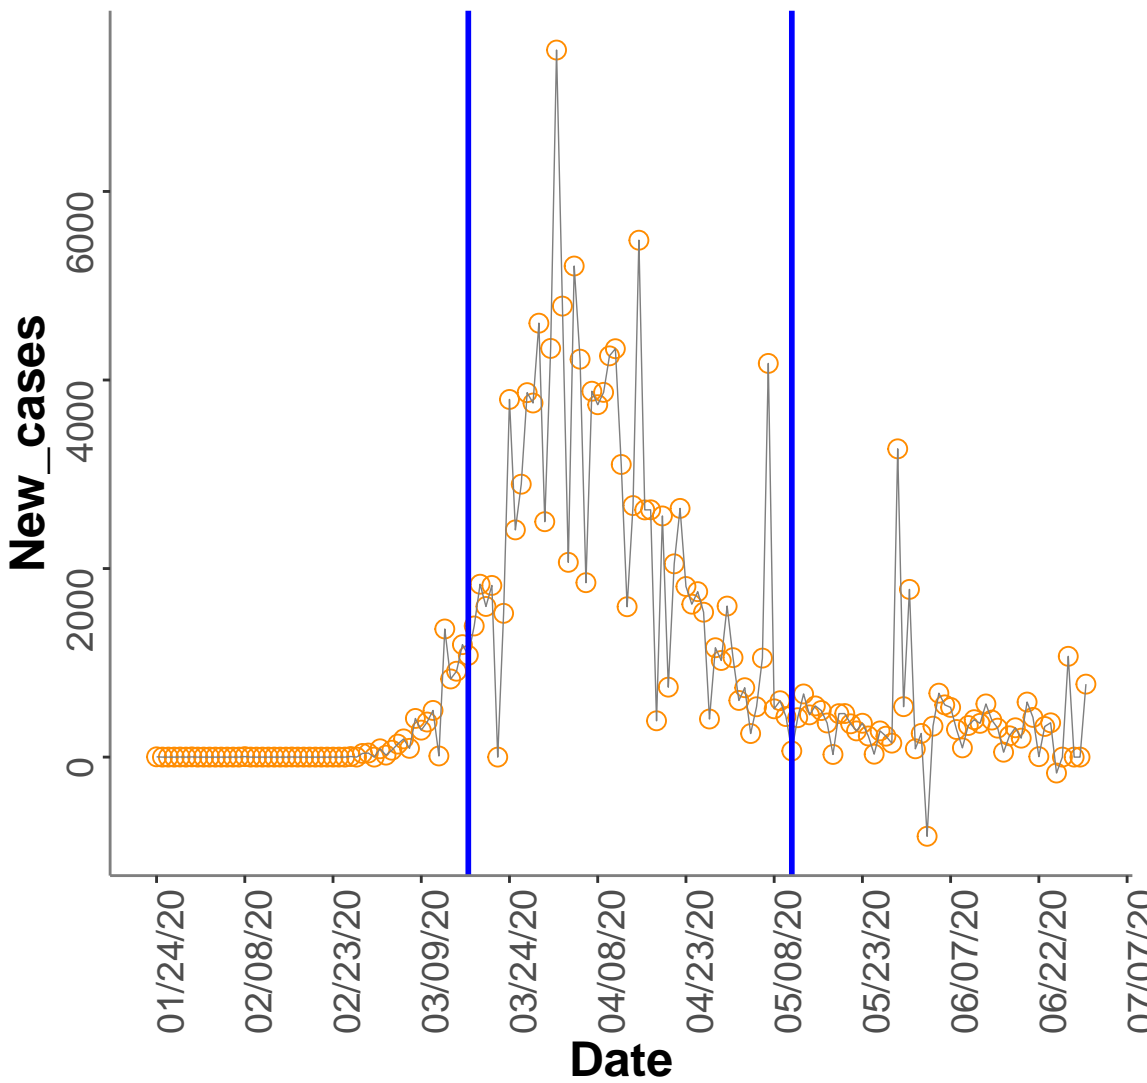

lockdown\_New\_cases\_Georgia

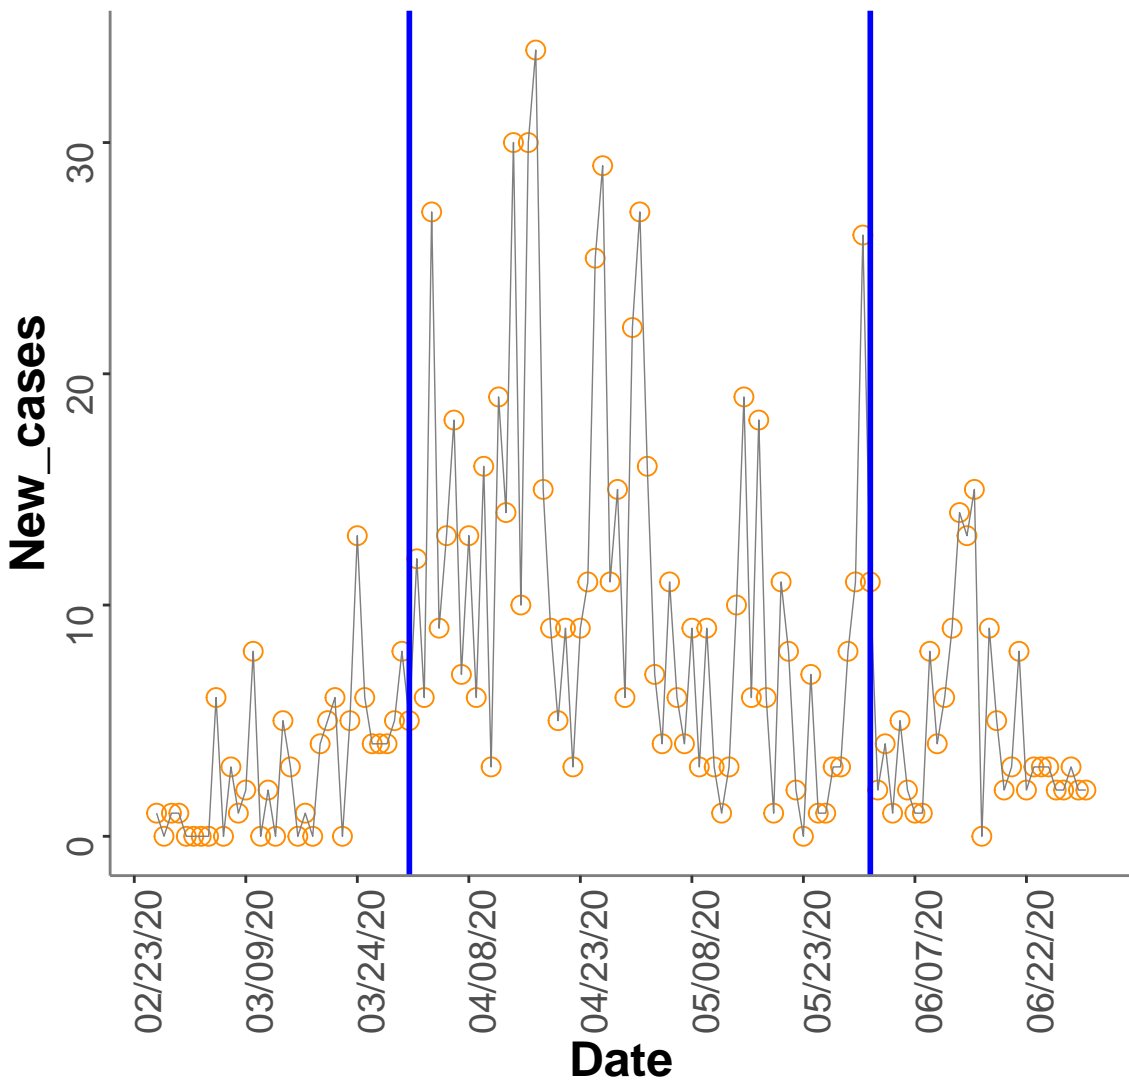

lockdown\_New\_cases\_Germany

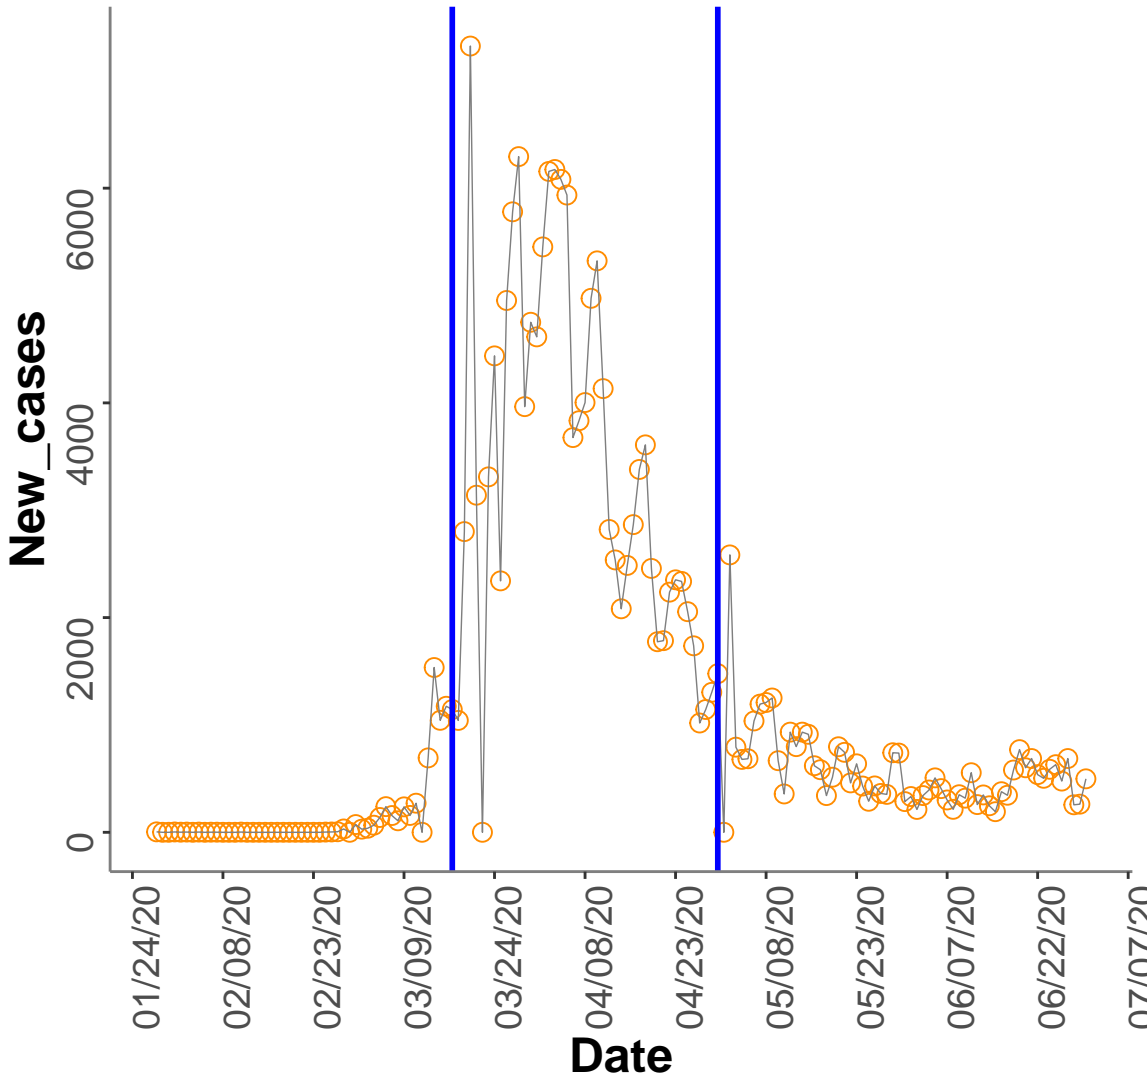

lockdown\_New\_cases\_Ghana

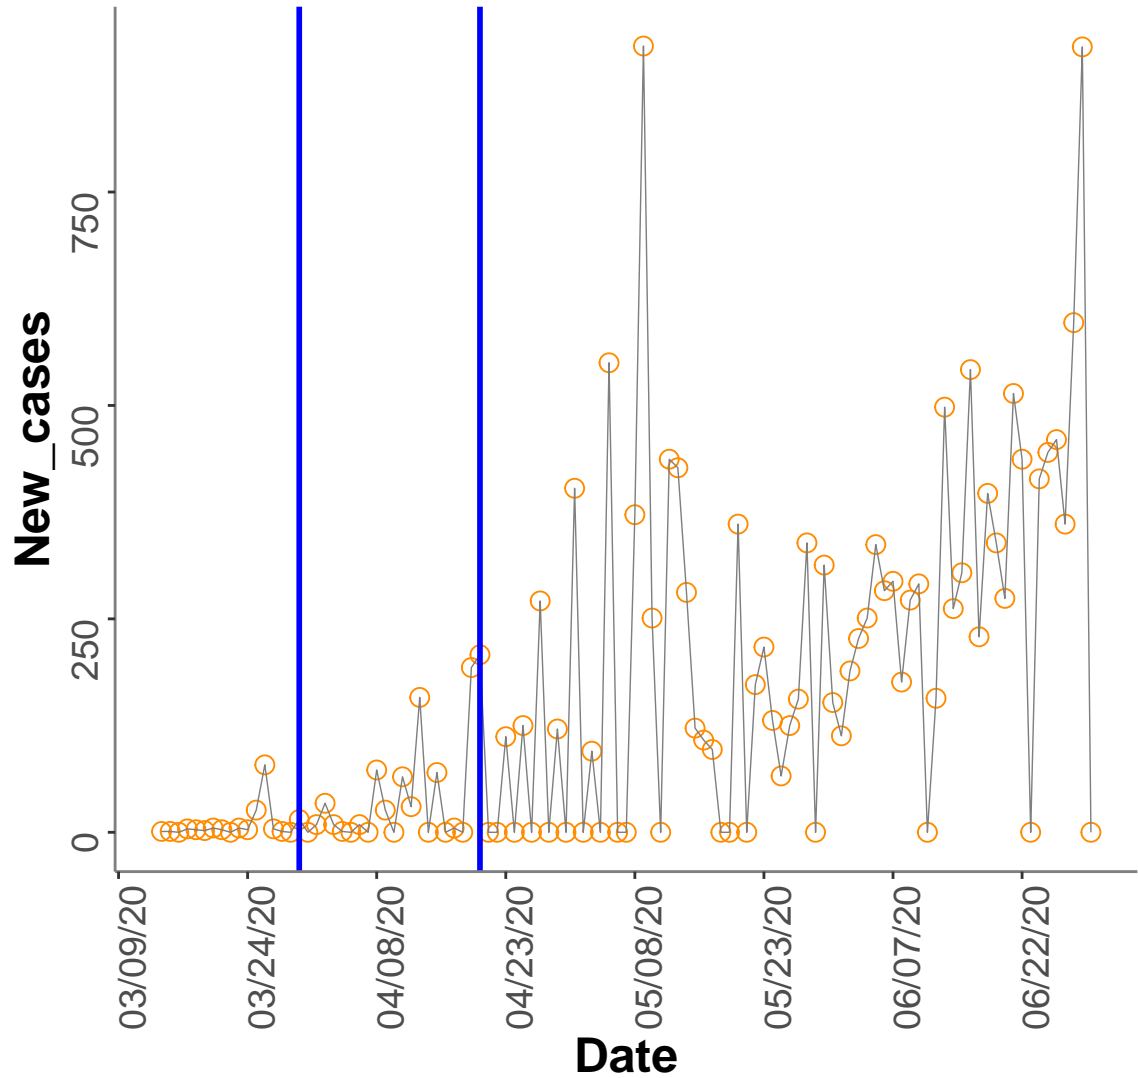

lockdown\_New\_cases\_Gibraltar

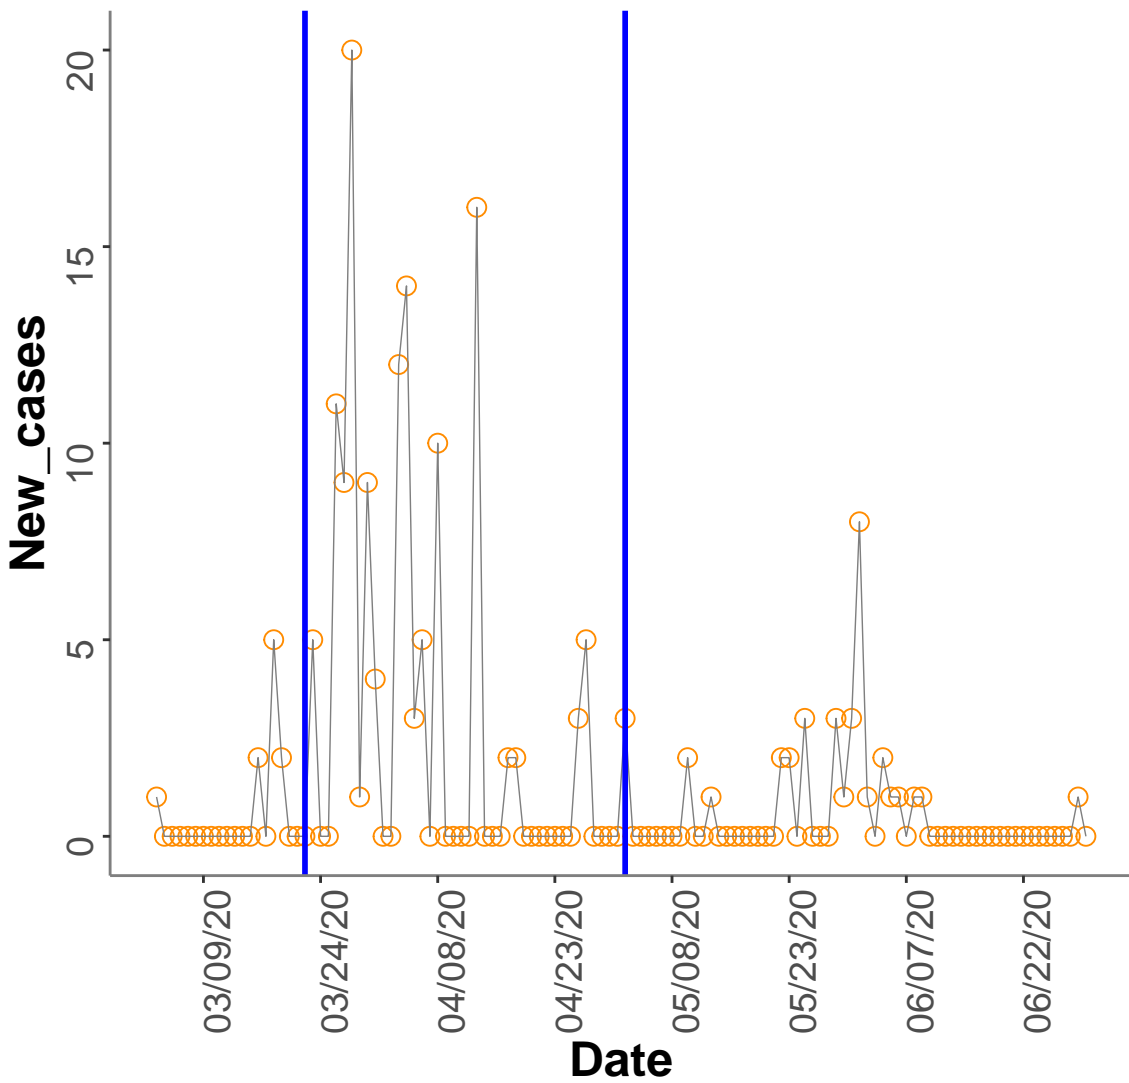



lockdown\_New\_cases\_Greece

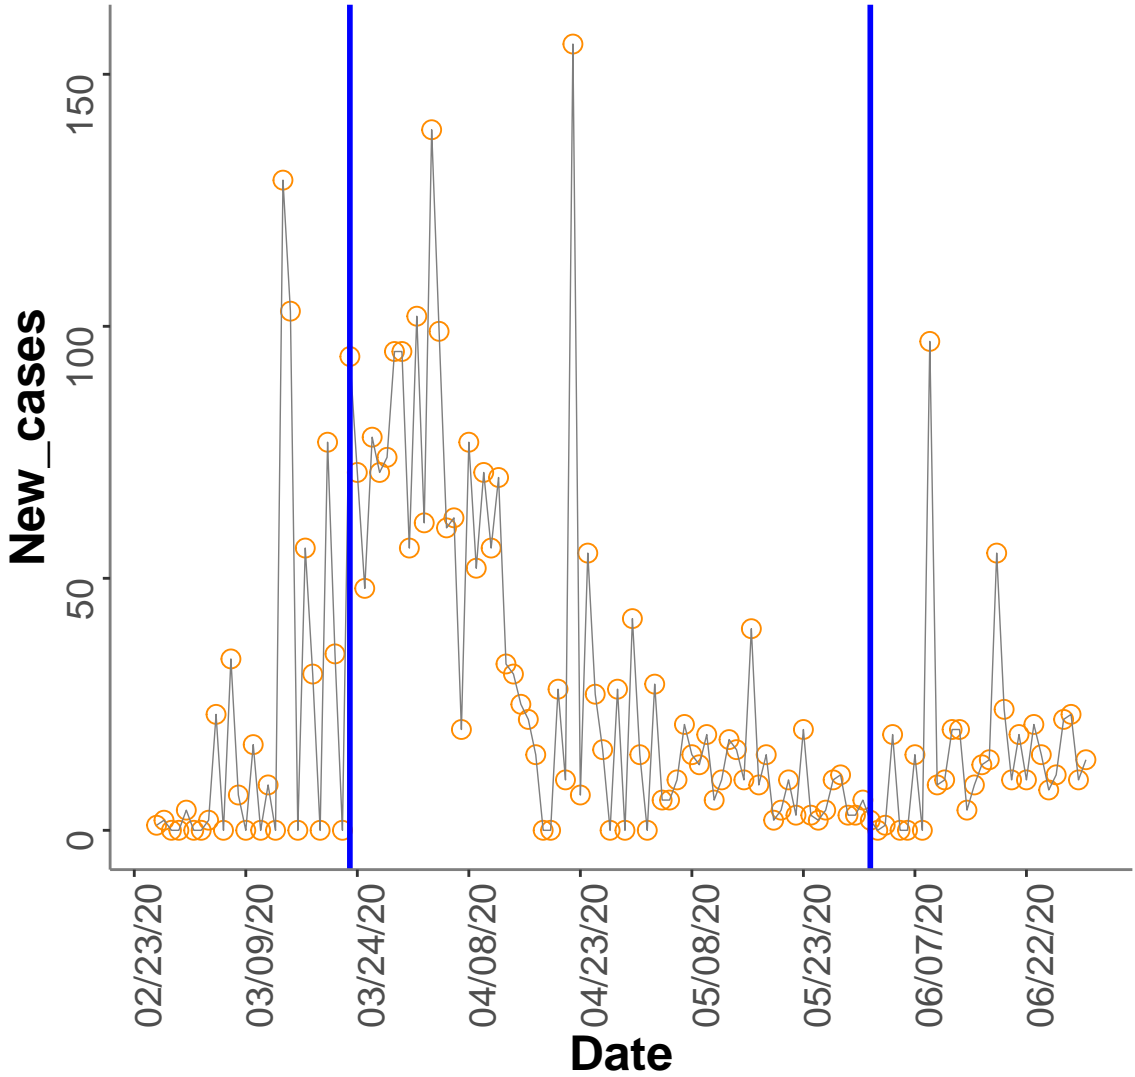

lockdown\_New\_cases\_Honduras

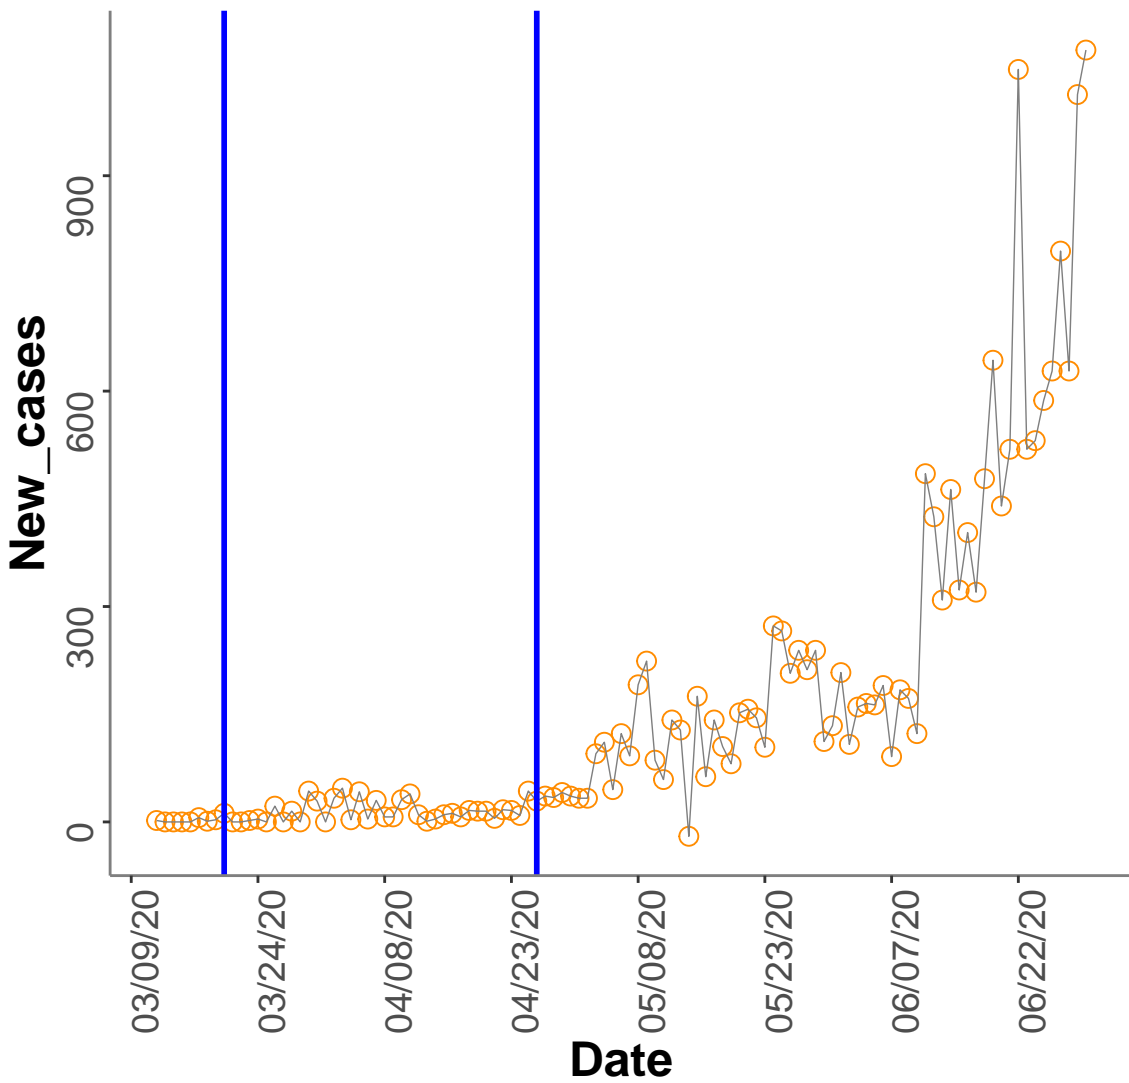

lockdown\_New\_cases\_Hungary

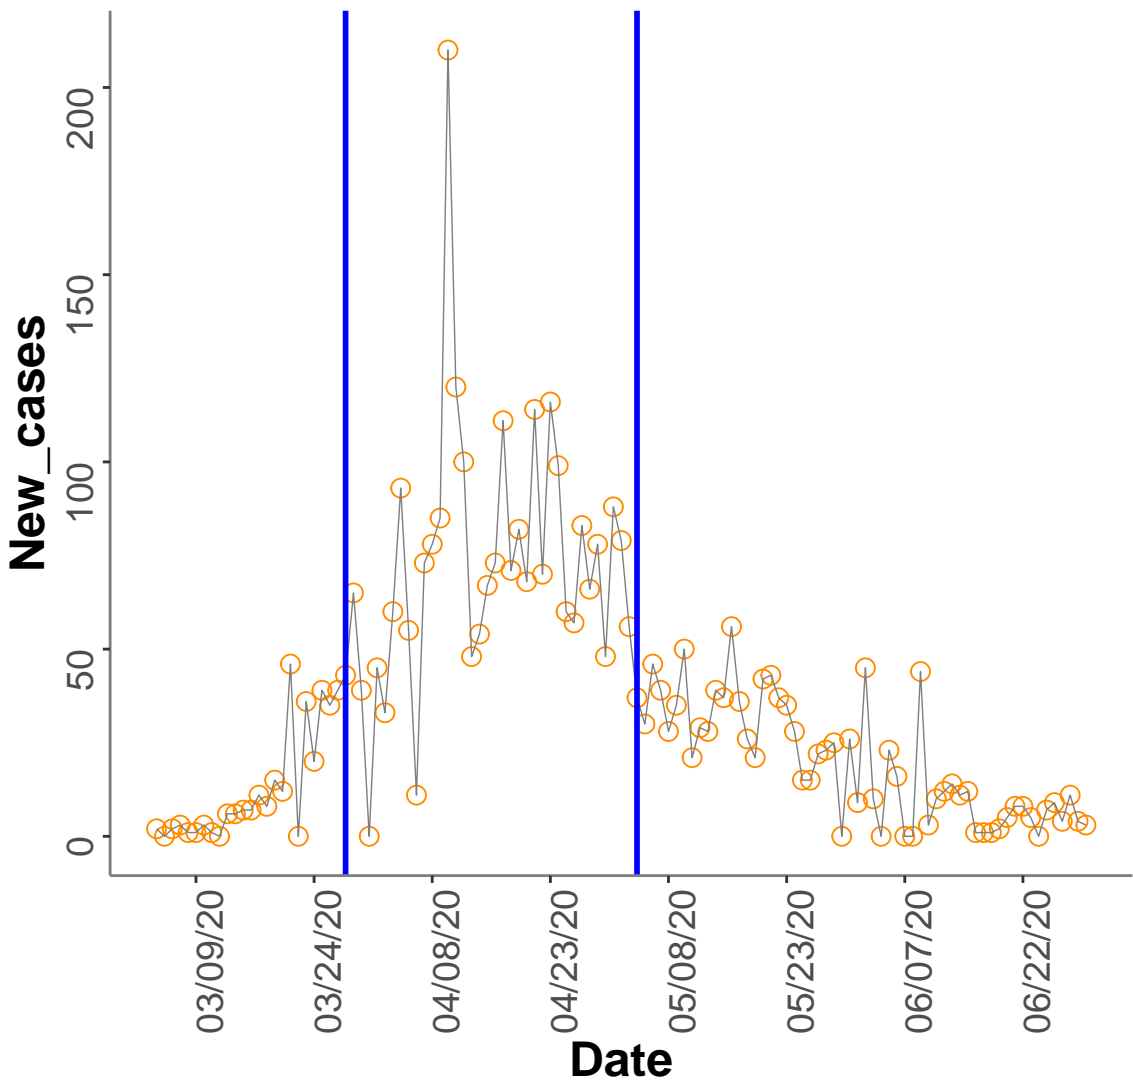

lockdown\_New\_cases\_India

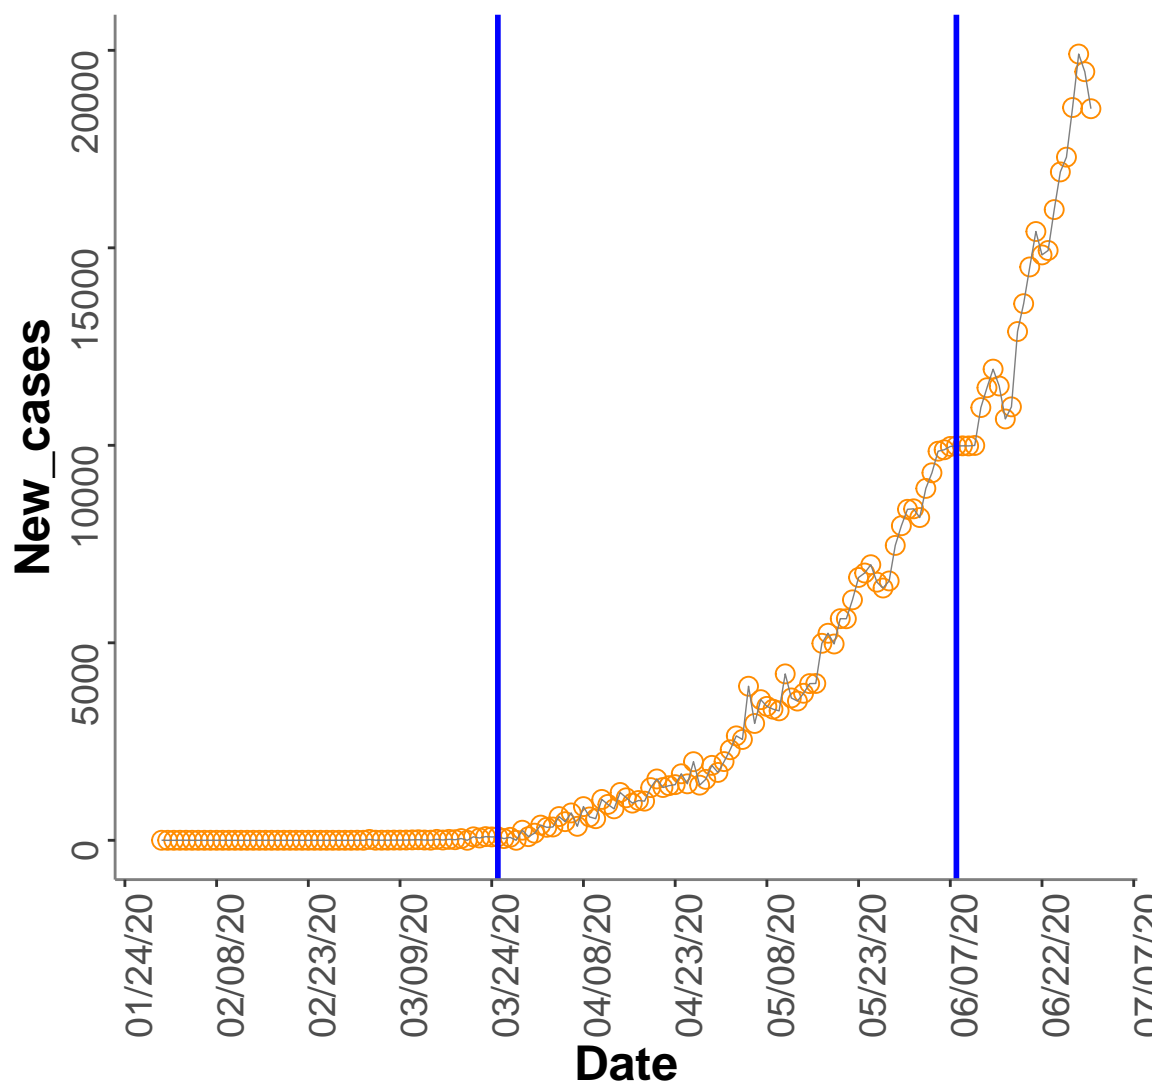

lockdown\_New\_cases\_Indonesia

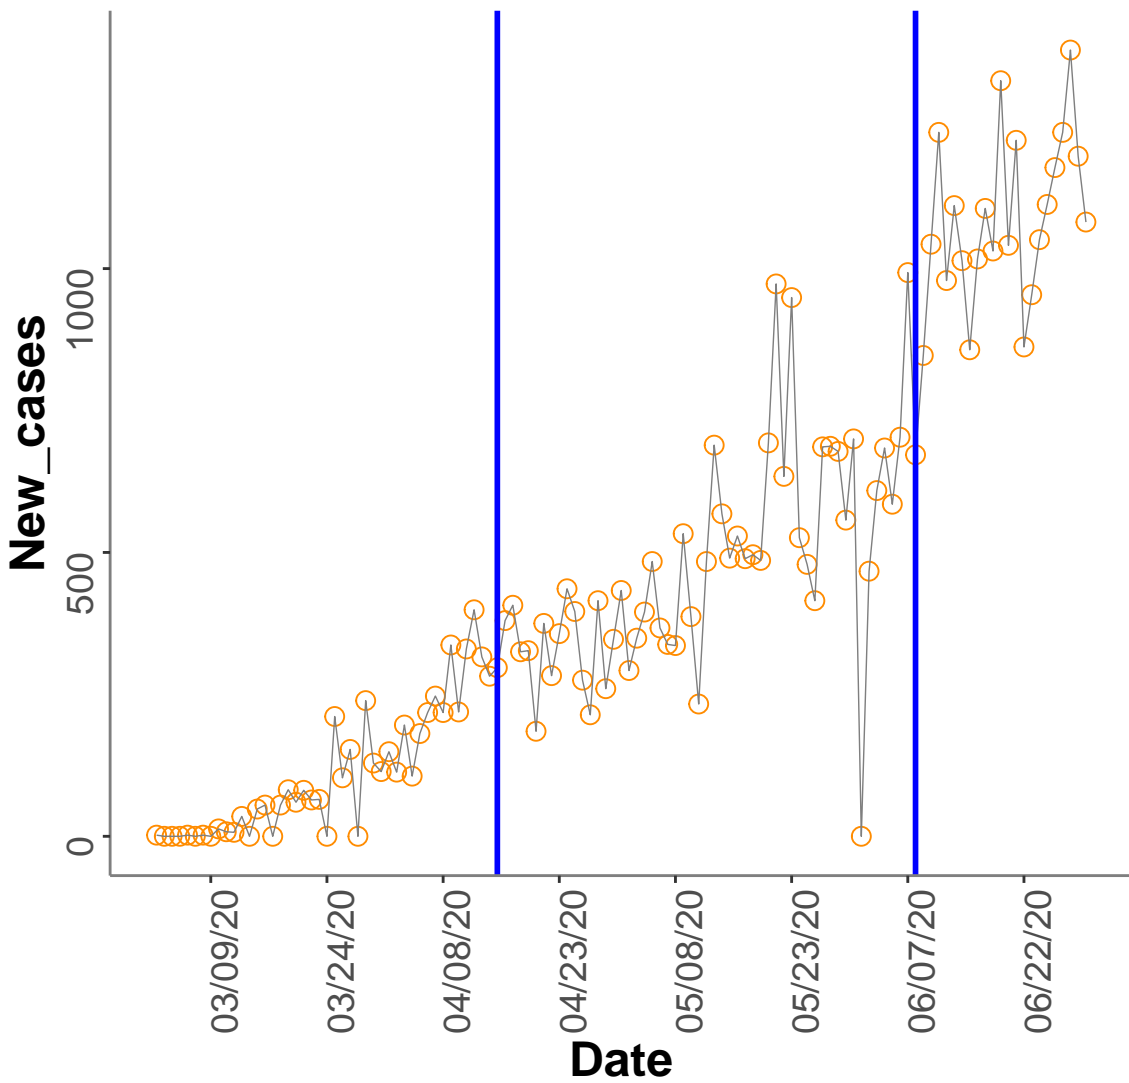

lockdown\_New\_cases\_Iran

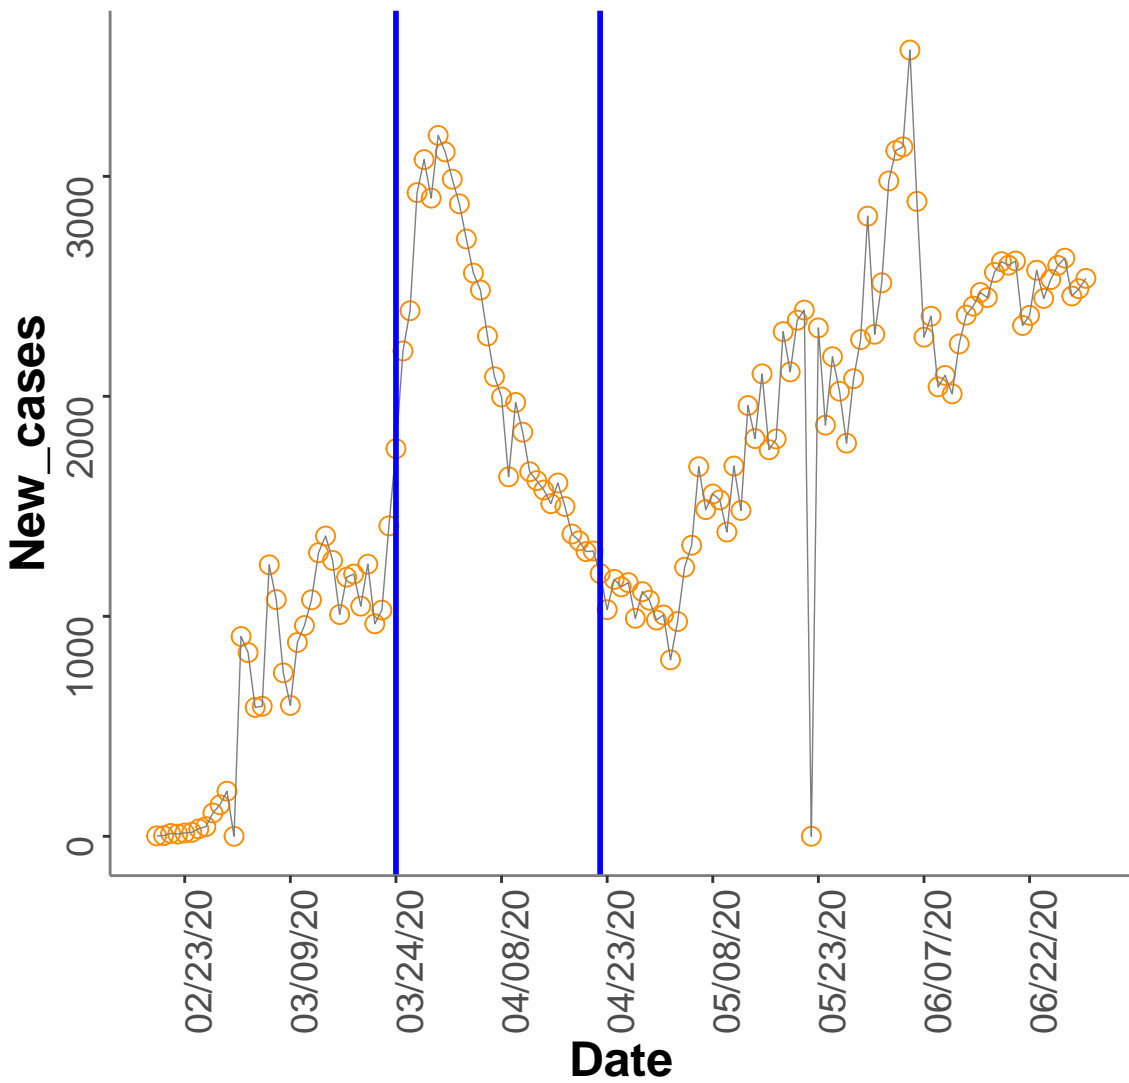

lockdown\_New\_cases\_Iraq

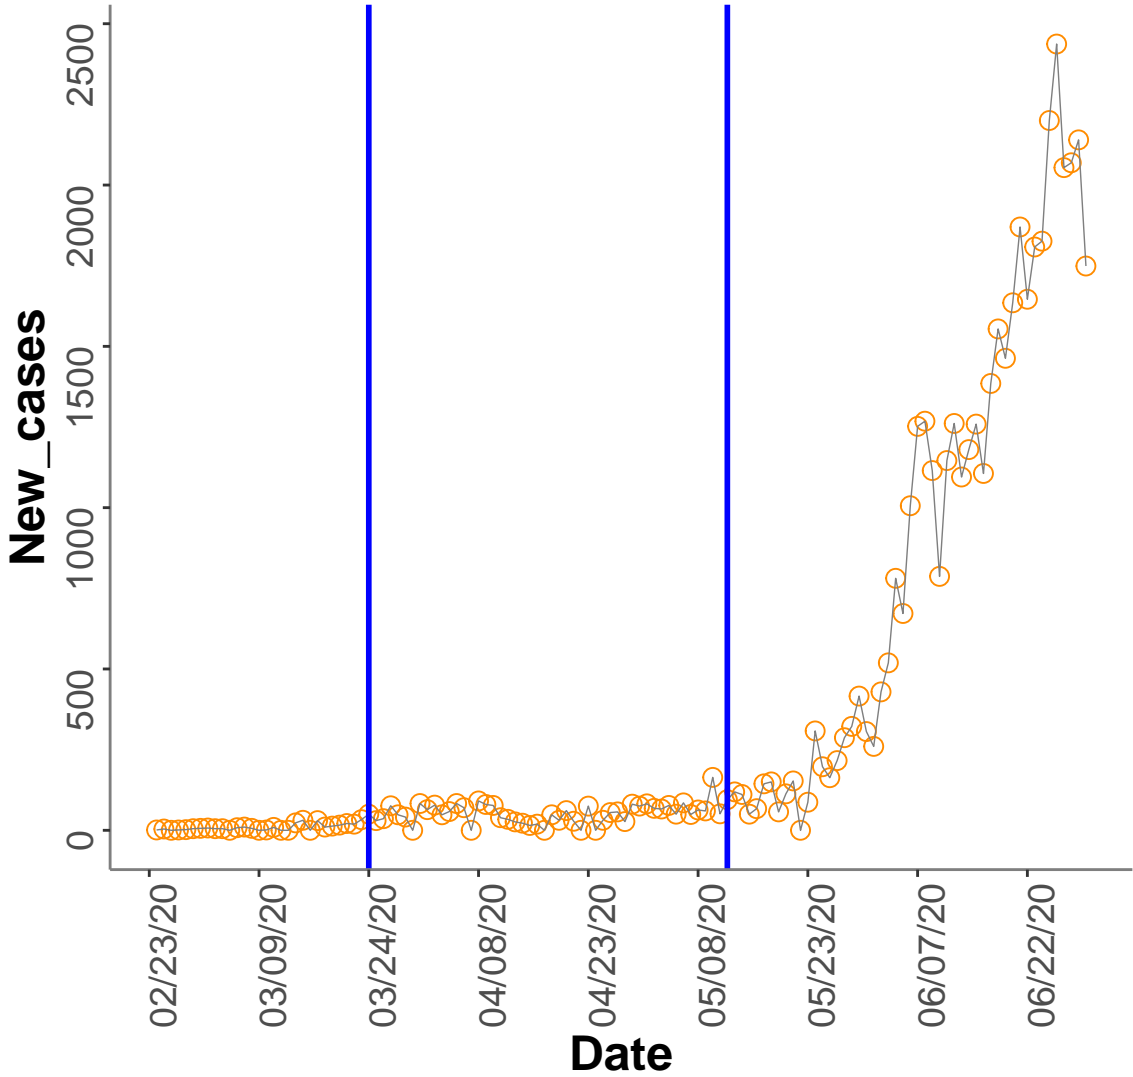

lockdown\_New\_cases\_Ireland

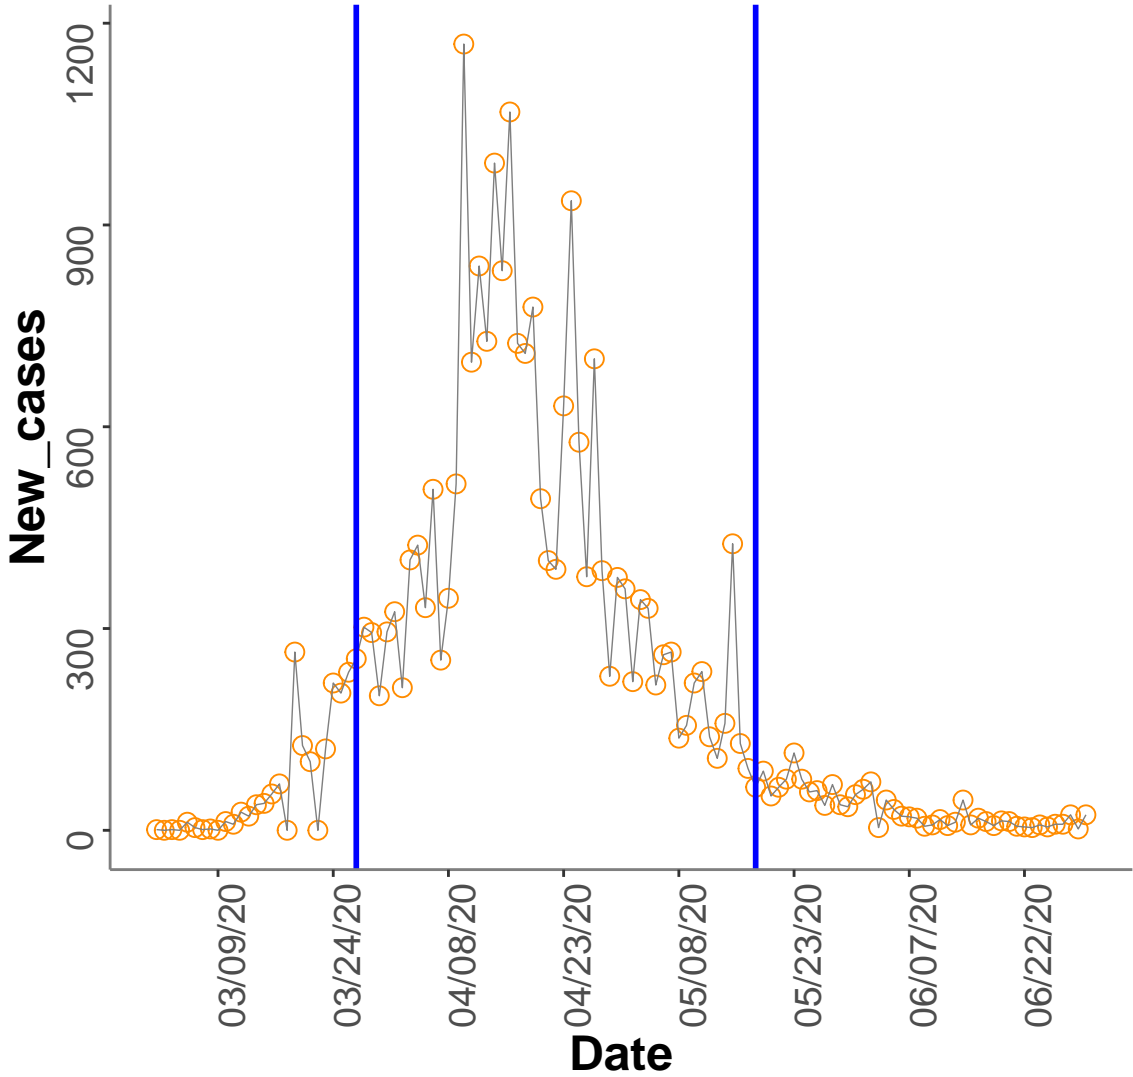



lockdown\_New\_cases\_Israel

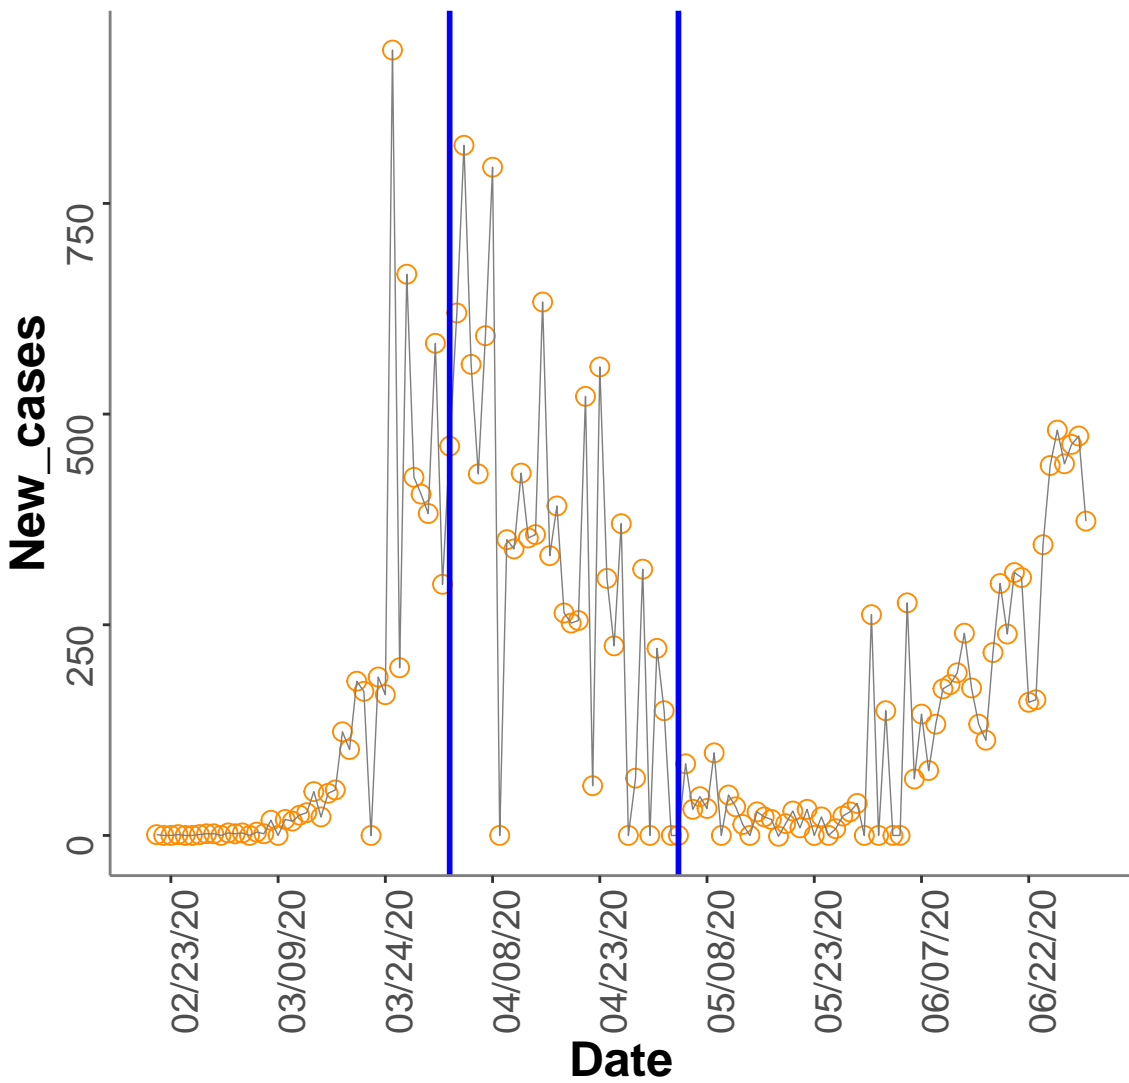

lockdown\_New\_cases\_IItaly

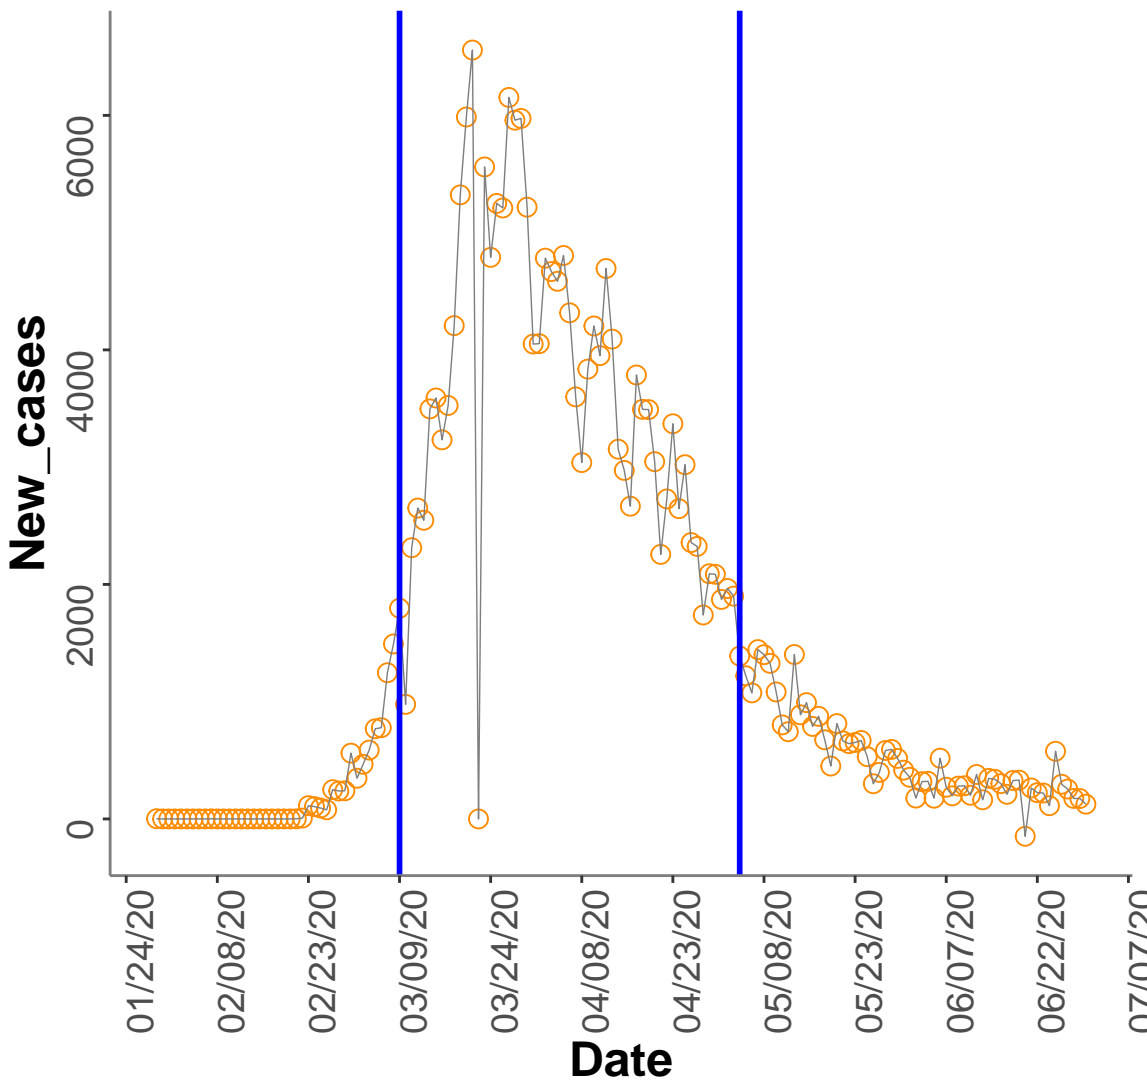

lockdown\_New\_cases\_Jamaica

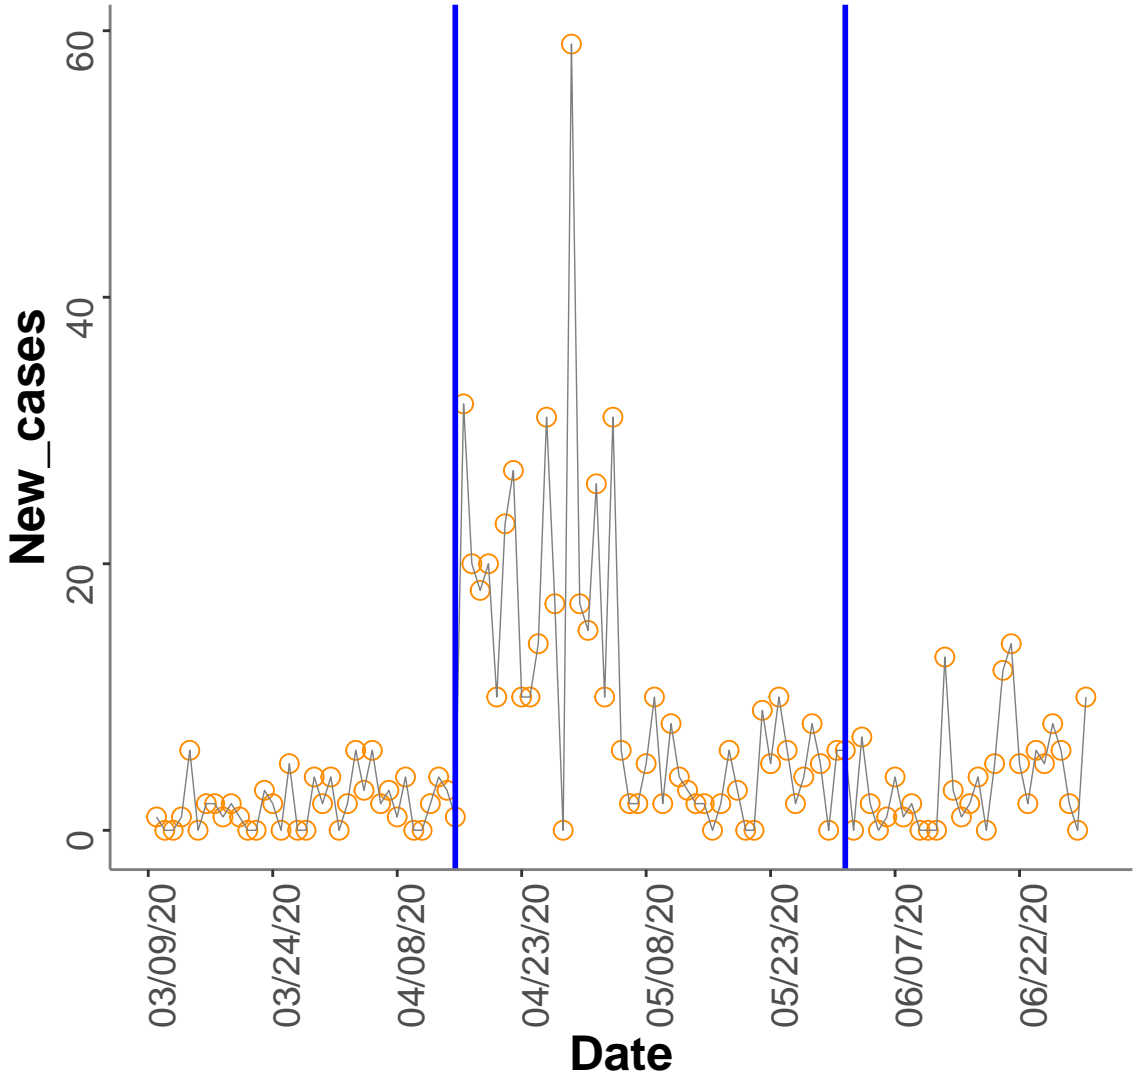

lockdown\_New\_cases\_Japan

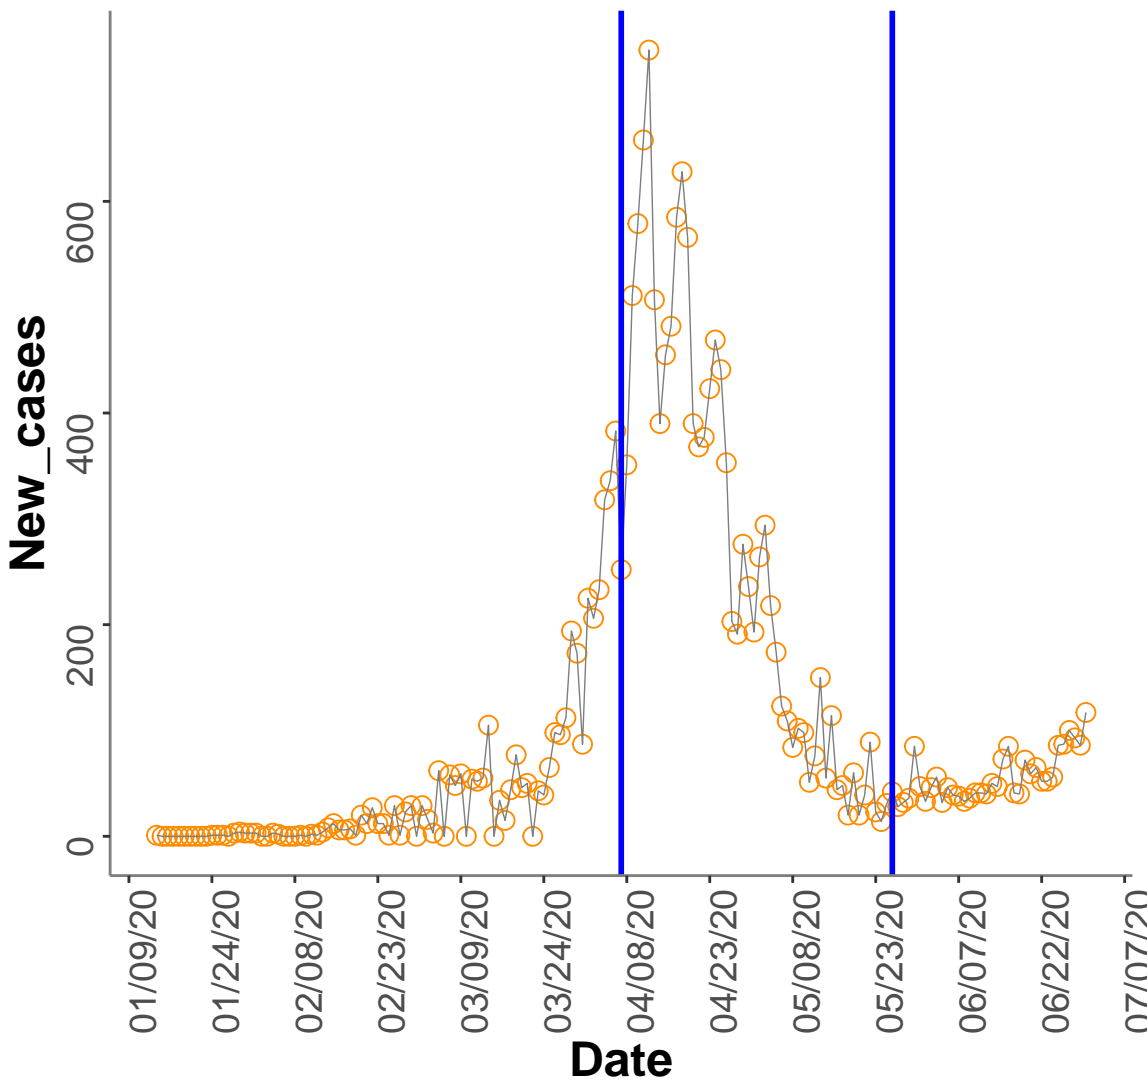

lockdown\_New\_cases\_Jordan

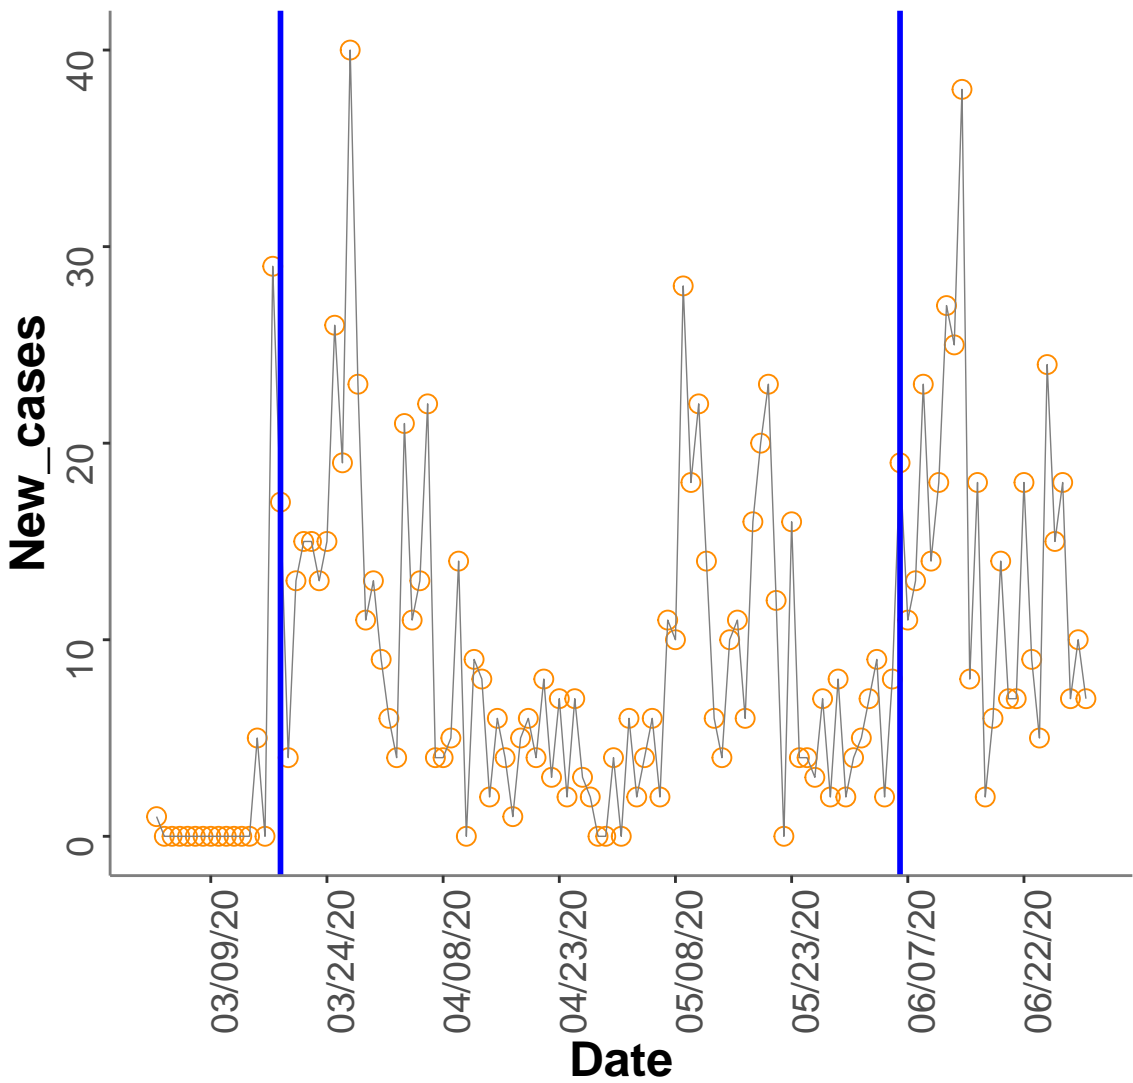

lockdown\_New\_cases\_Kazakhstan

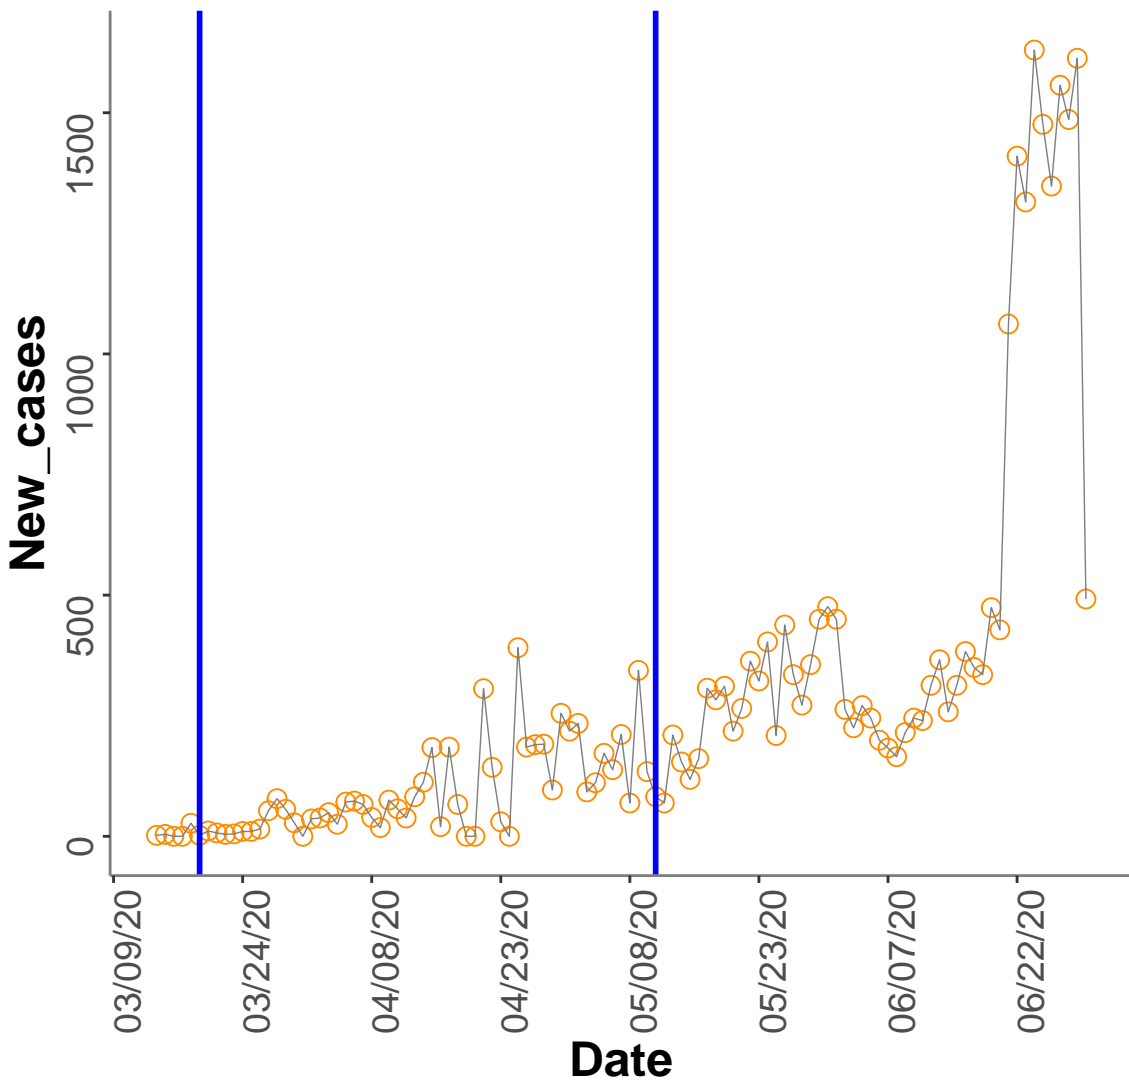

lockdown\_New\_cases\_Kosovo

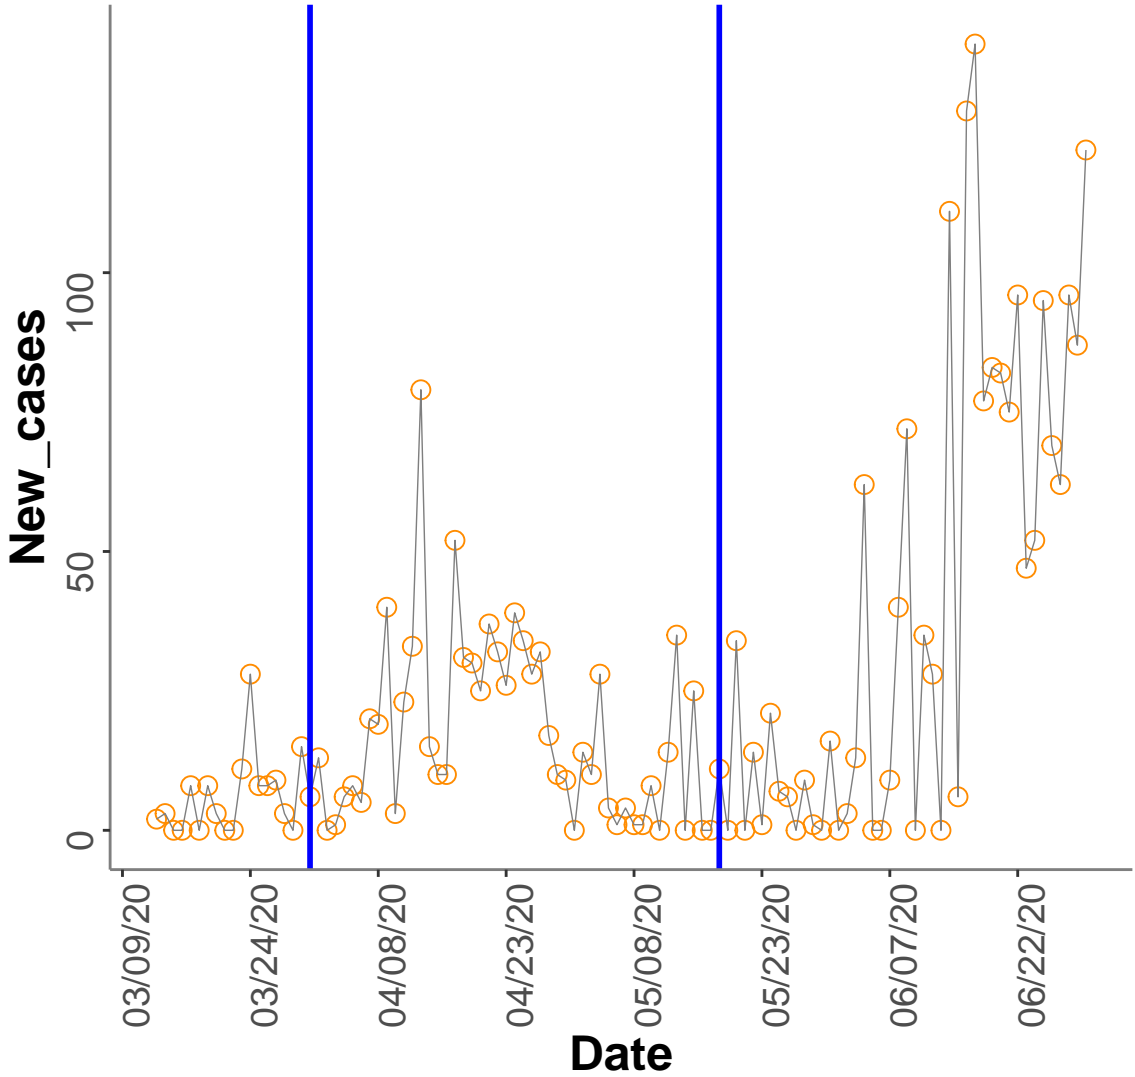

lockdown\_New\_cases\_Kuwait

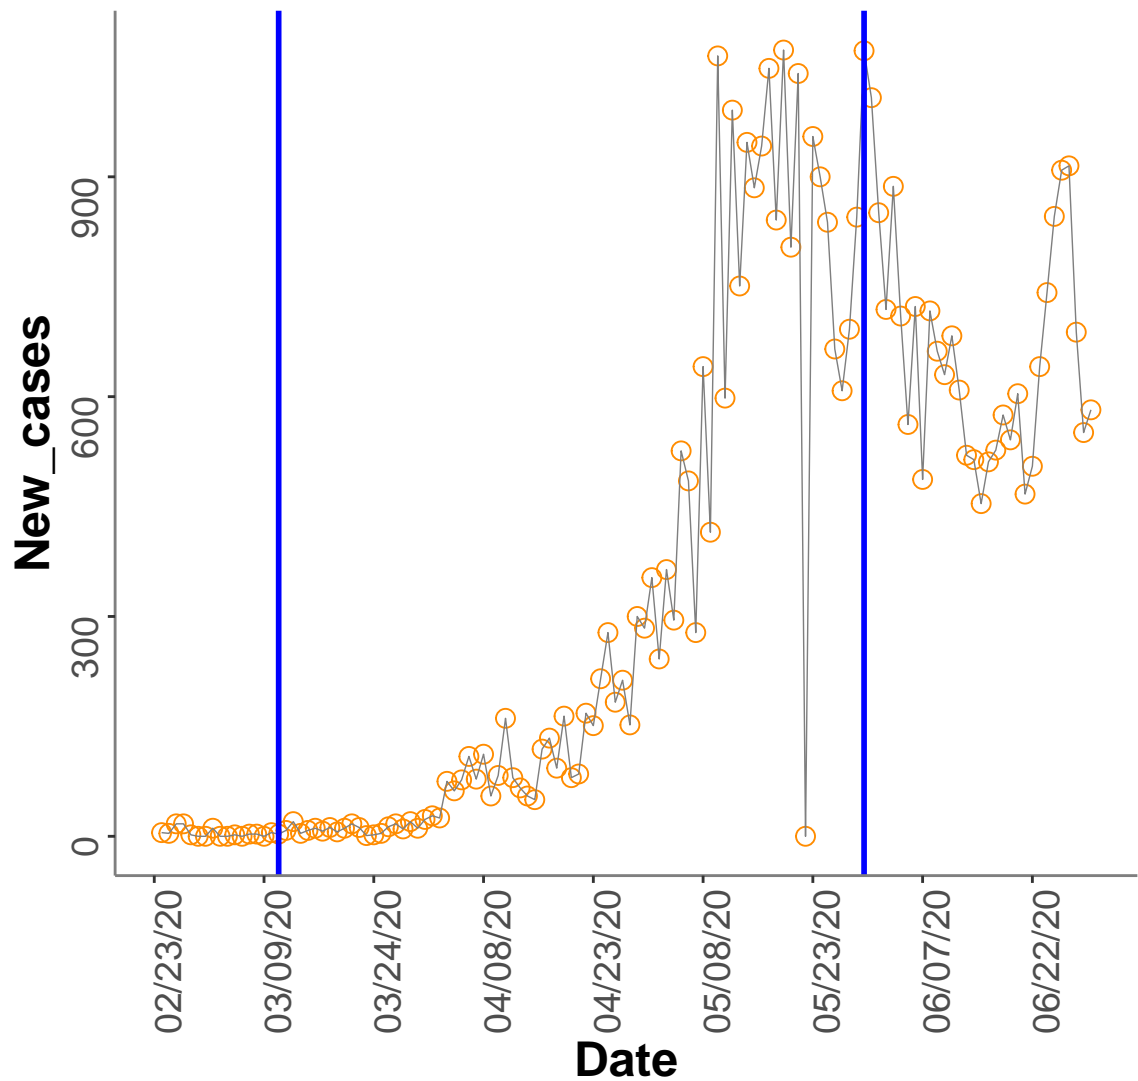



lockdown\_New\_cases\_Kyrgyzstan

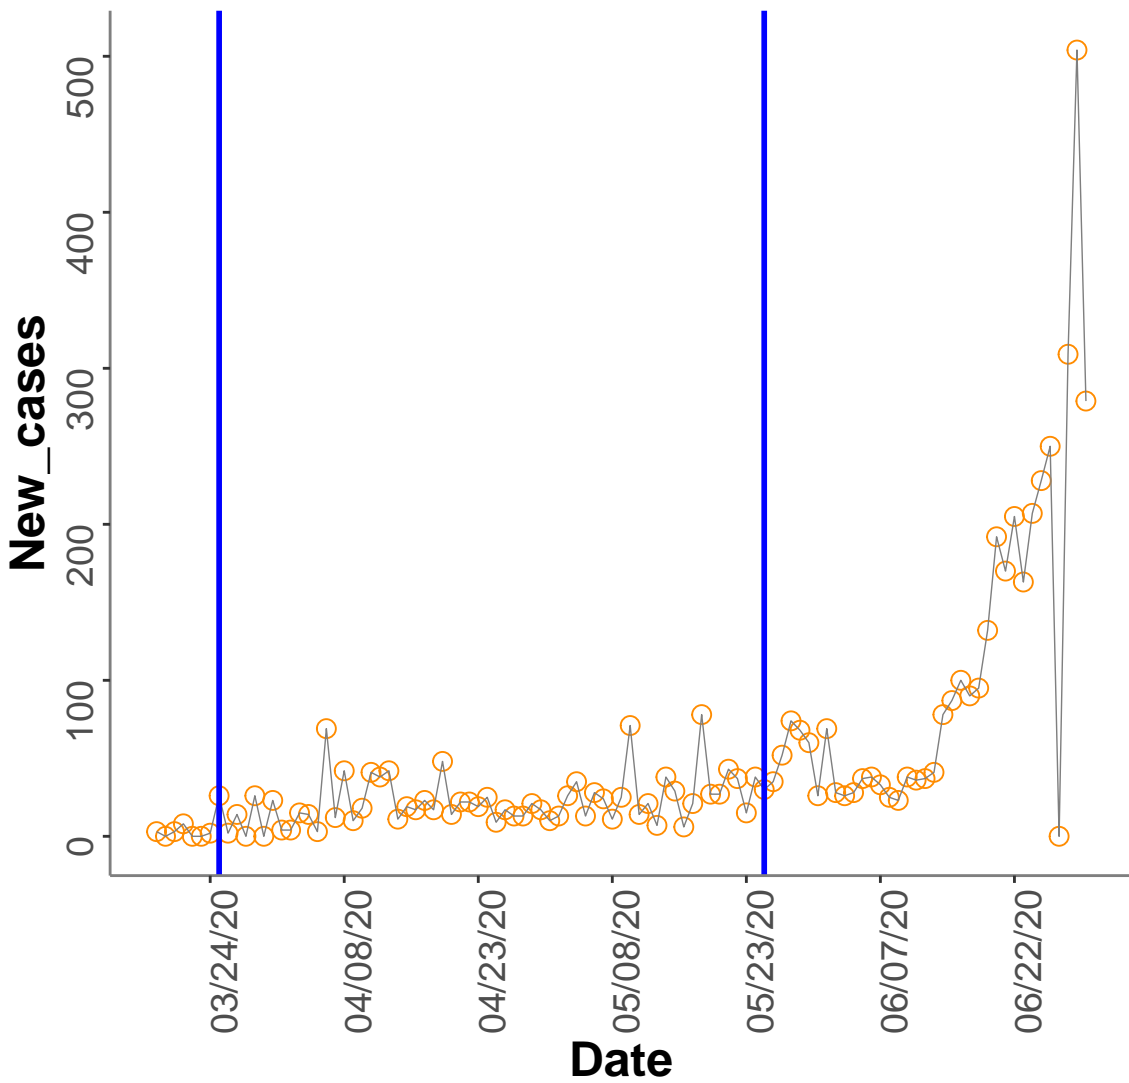

lockdown\_New\_cases\_Latvia

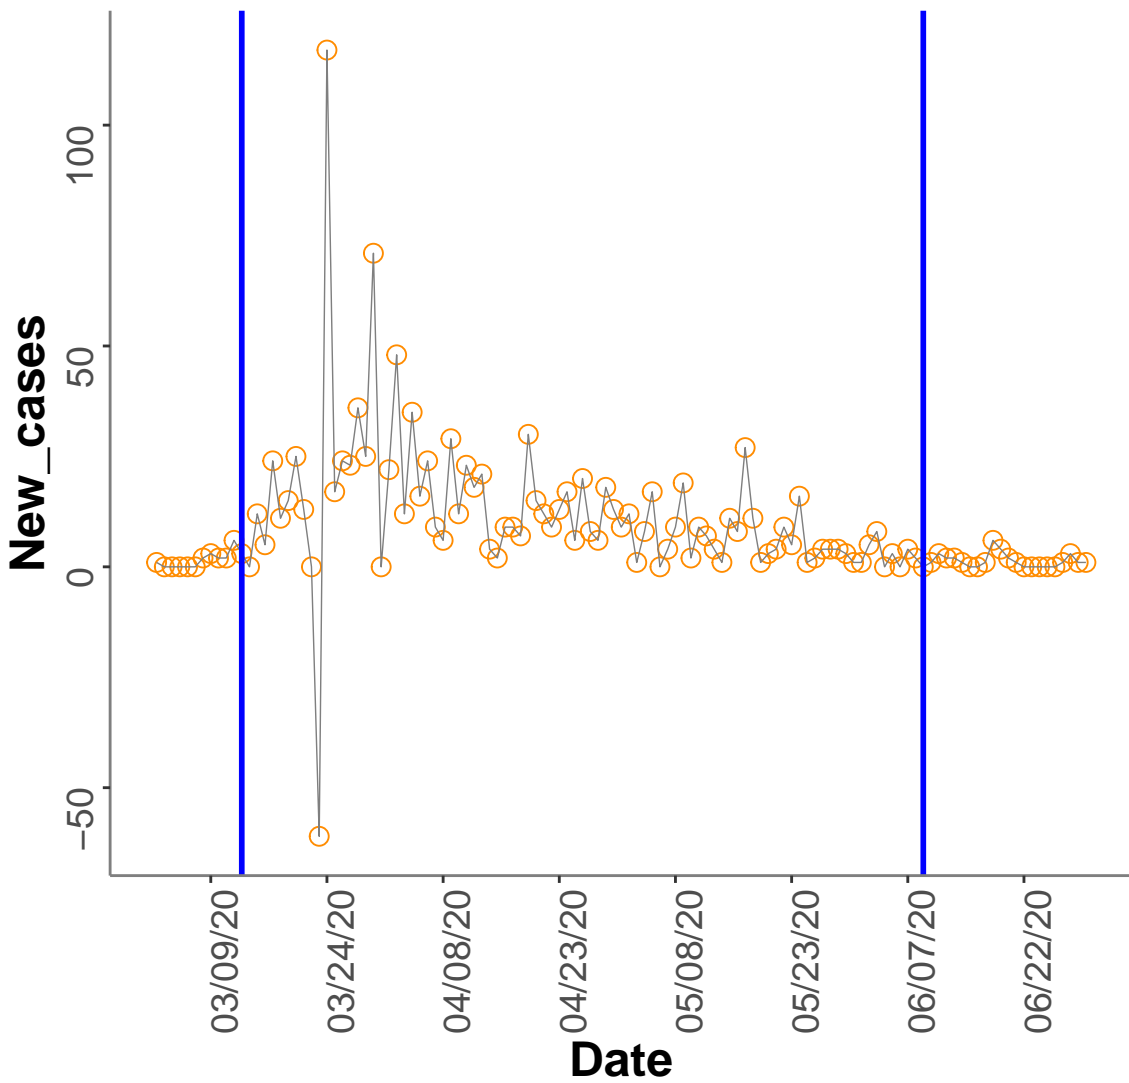

lockdown\_New\_cases\_Lebanon

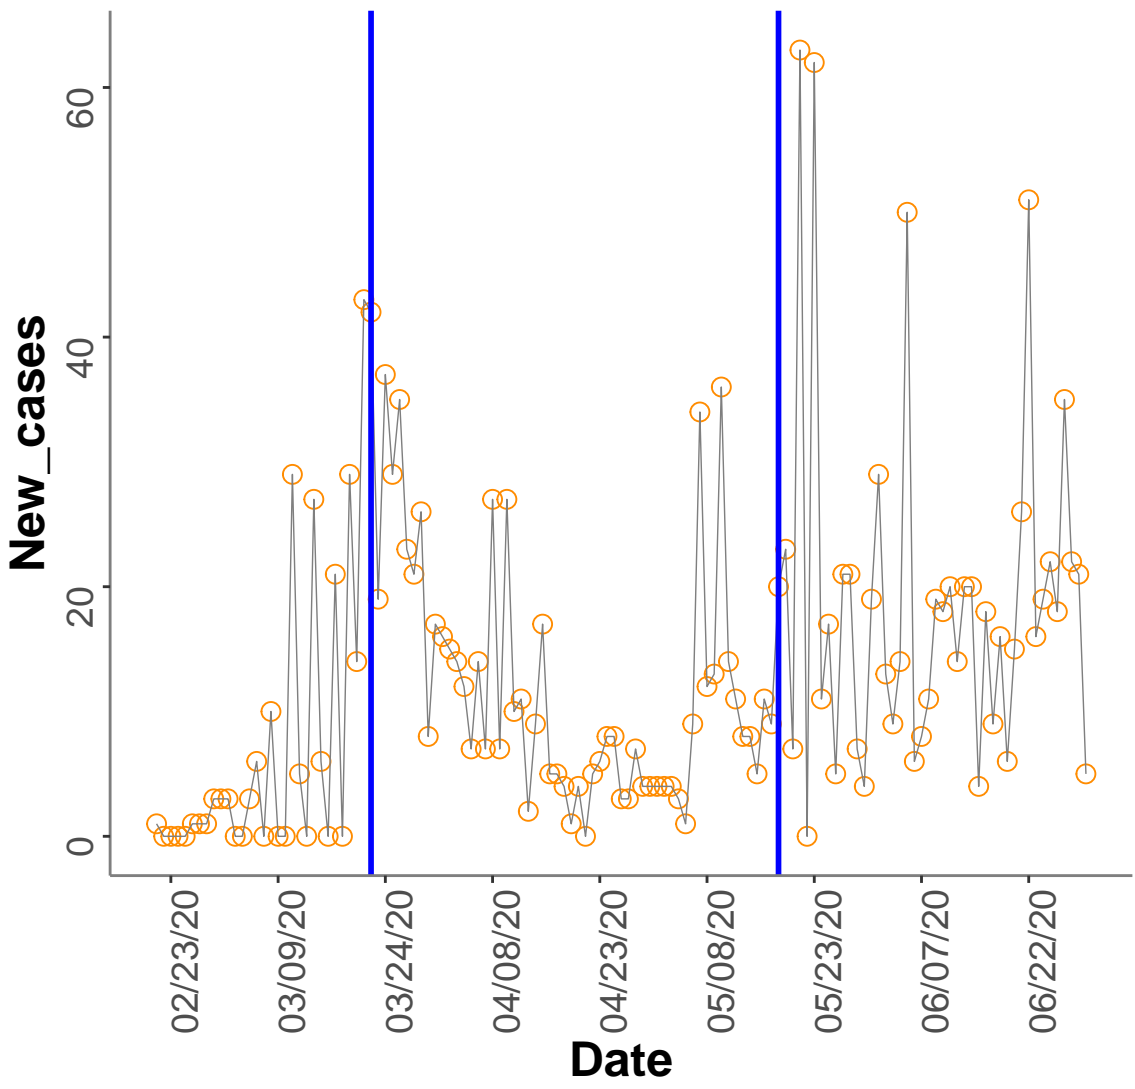

lockdown\_New\_cases\_Liberia

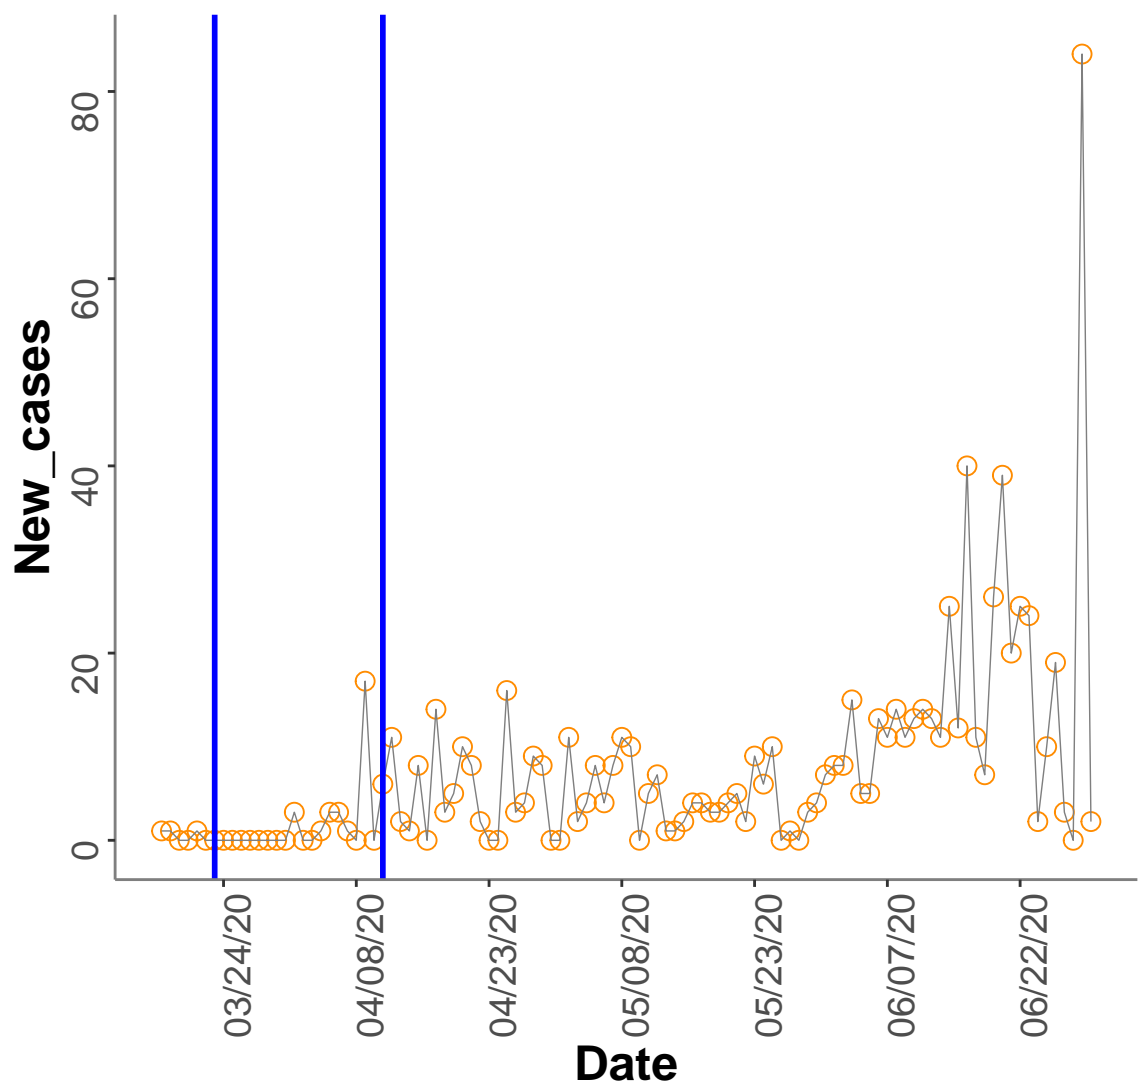

lockdown\_New\_cases\_Lithuania

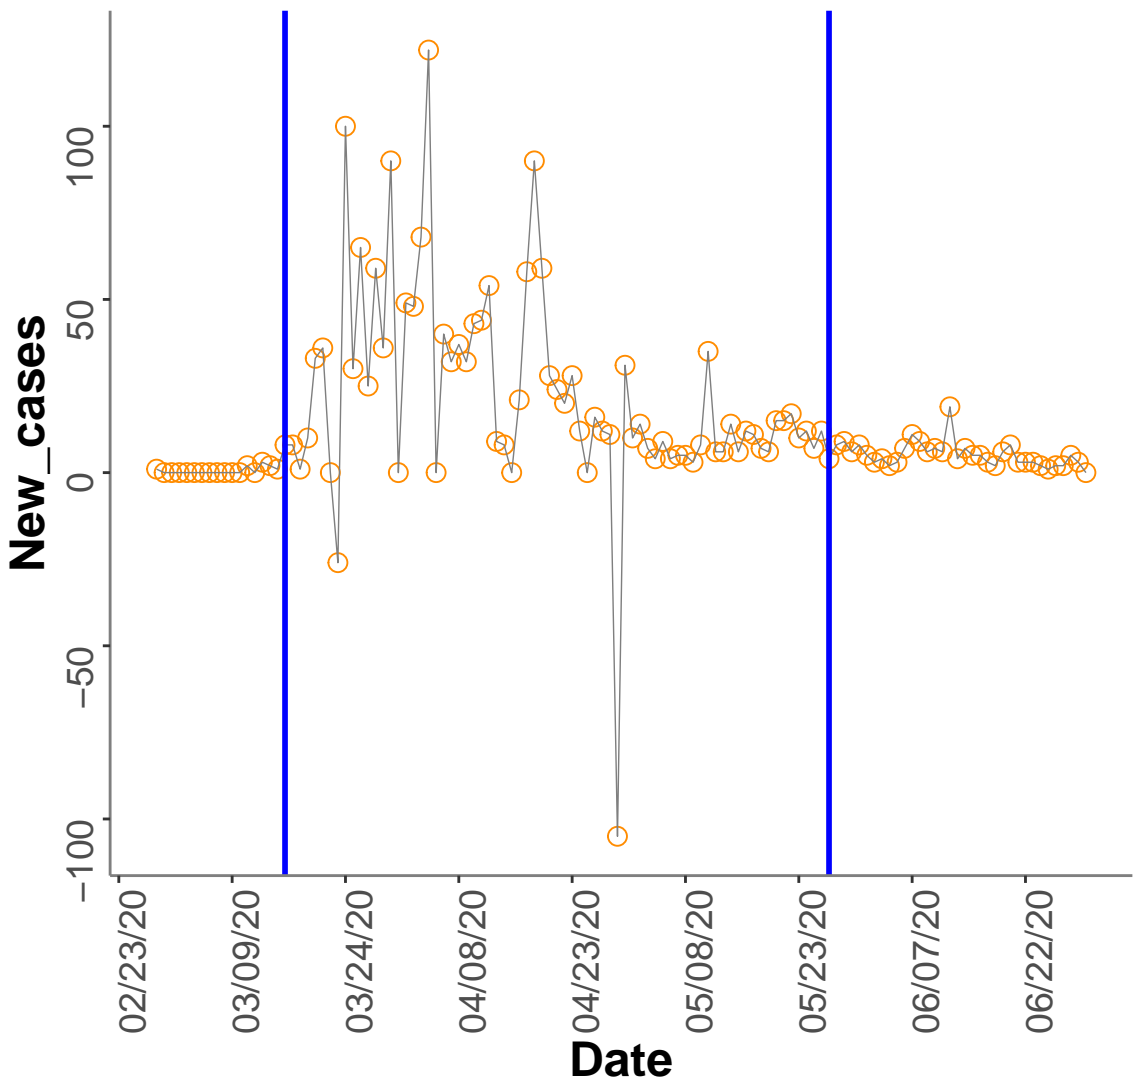

lockdown\_New\_cases\_Luxembourg

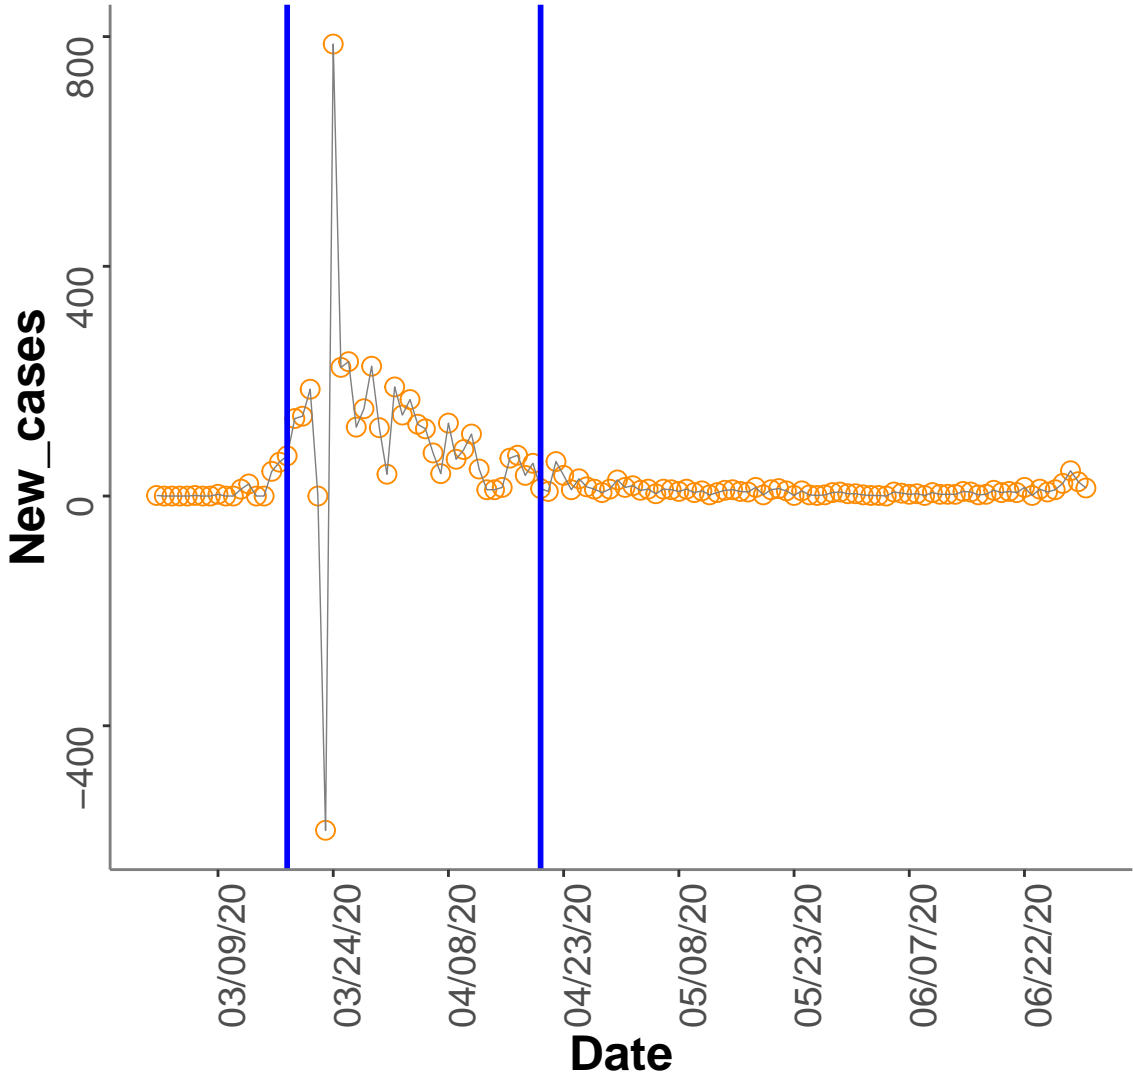

lockdown\_New\_cases\_Madagascar

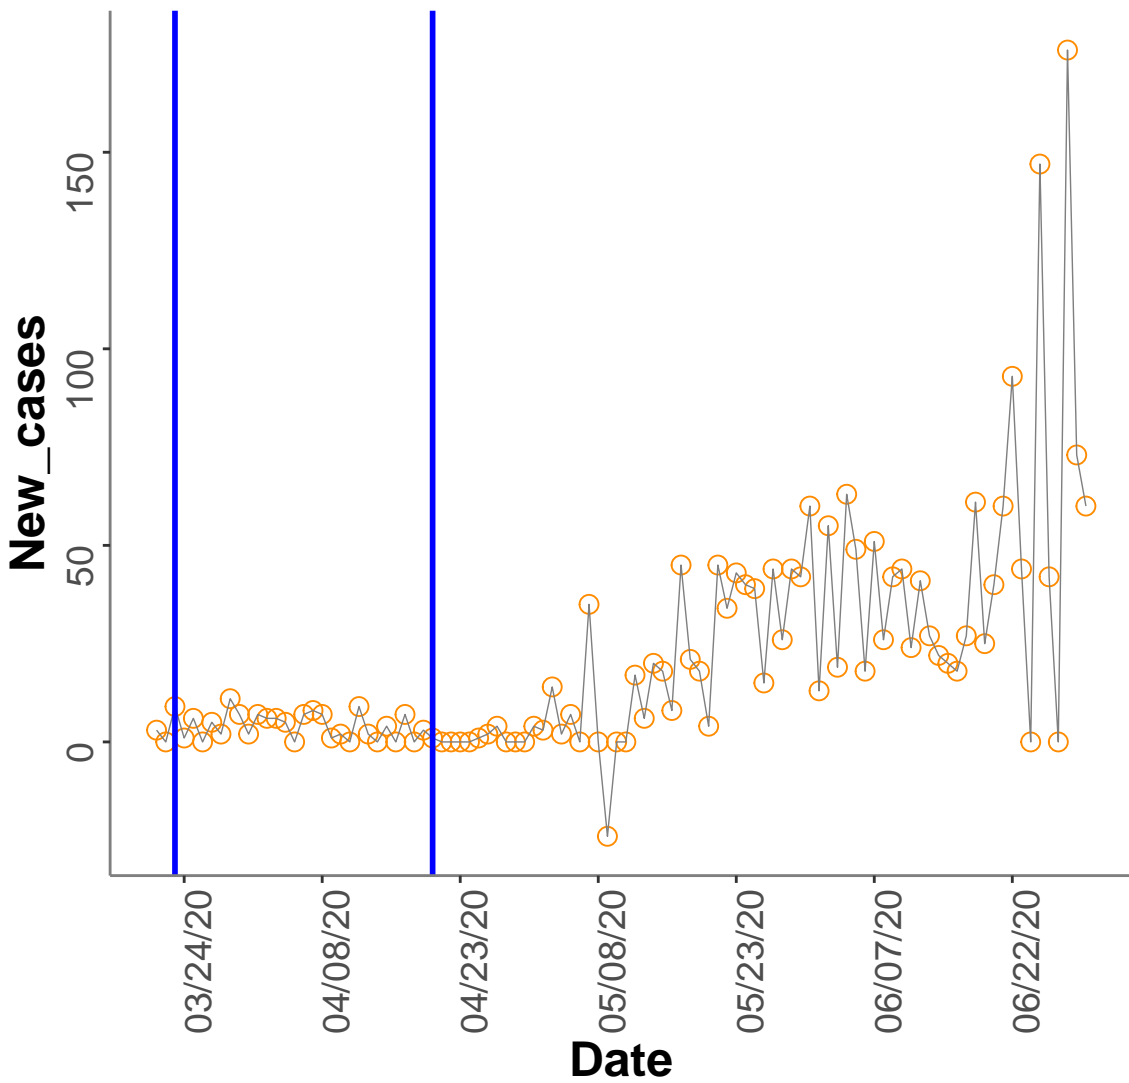

lockdown\_New\_cases\_Malaysia

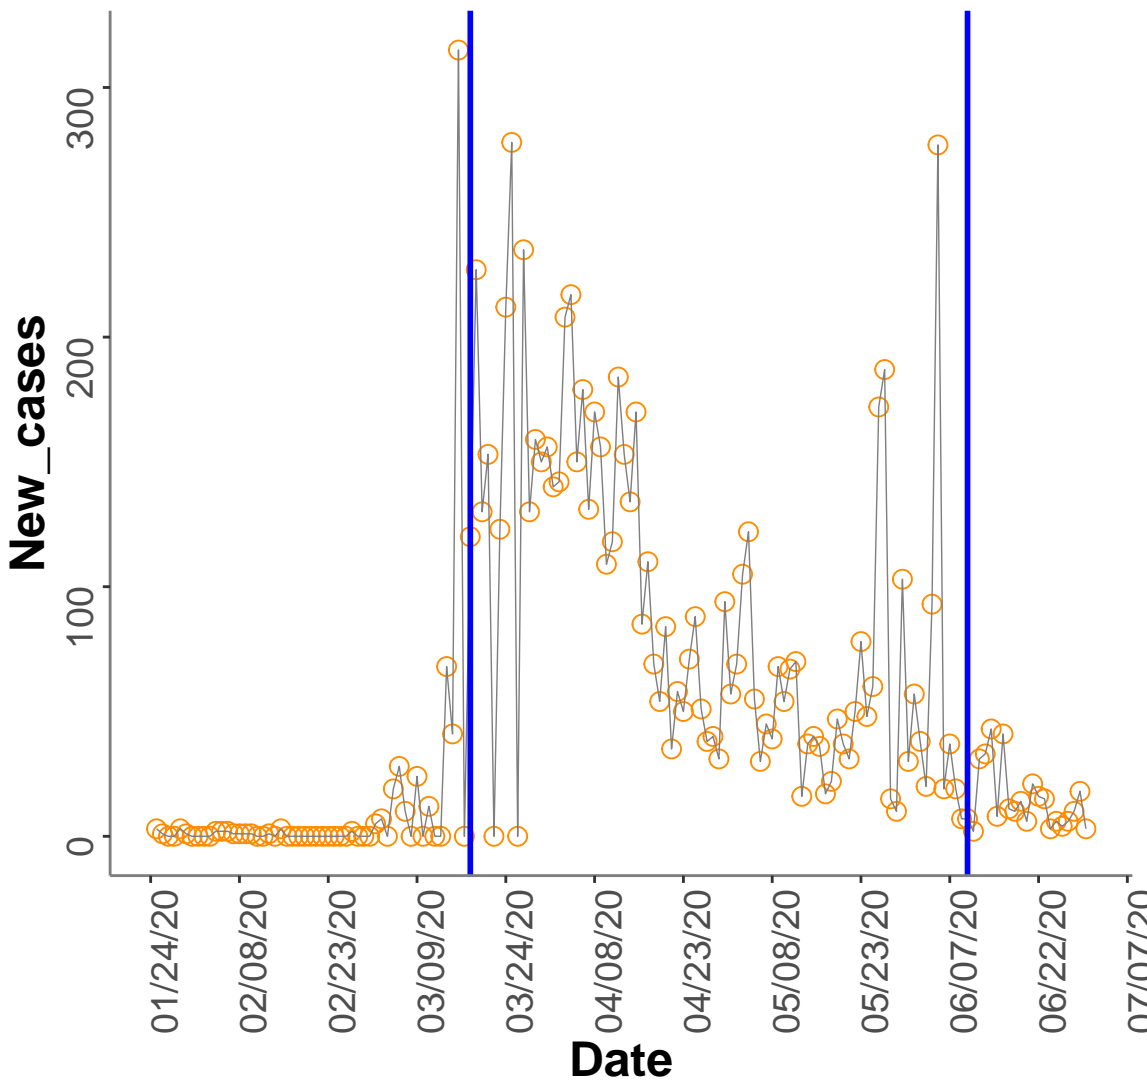



lockdown\_New\_cases\_Maldives

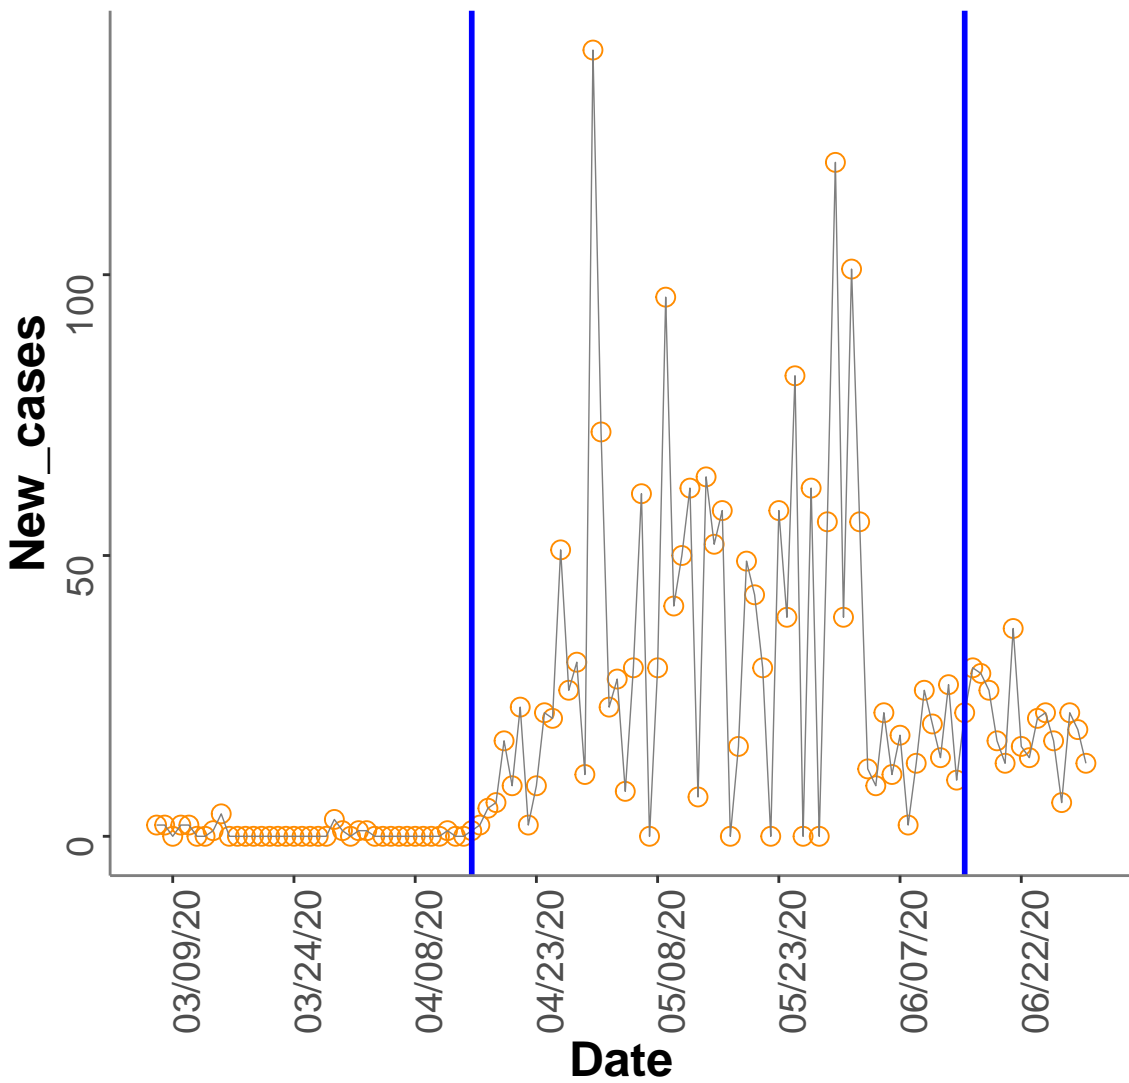

lockdown\_New\_cases\_Mauritania

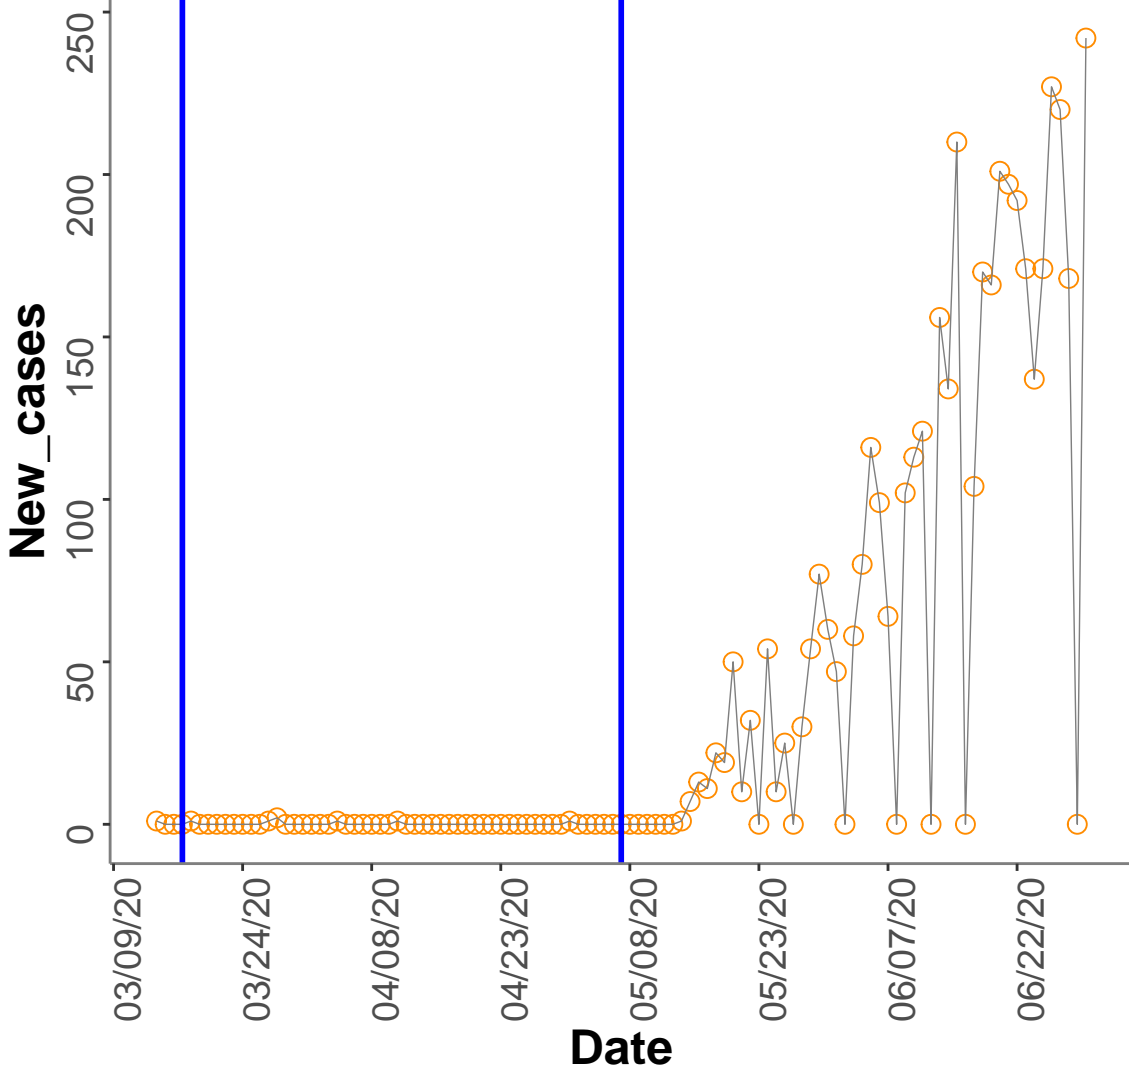

lockdown\_New\_cases\_Mauritius

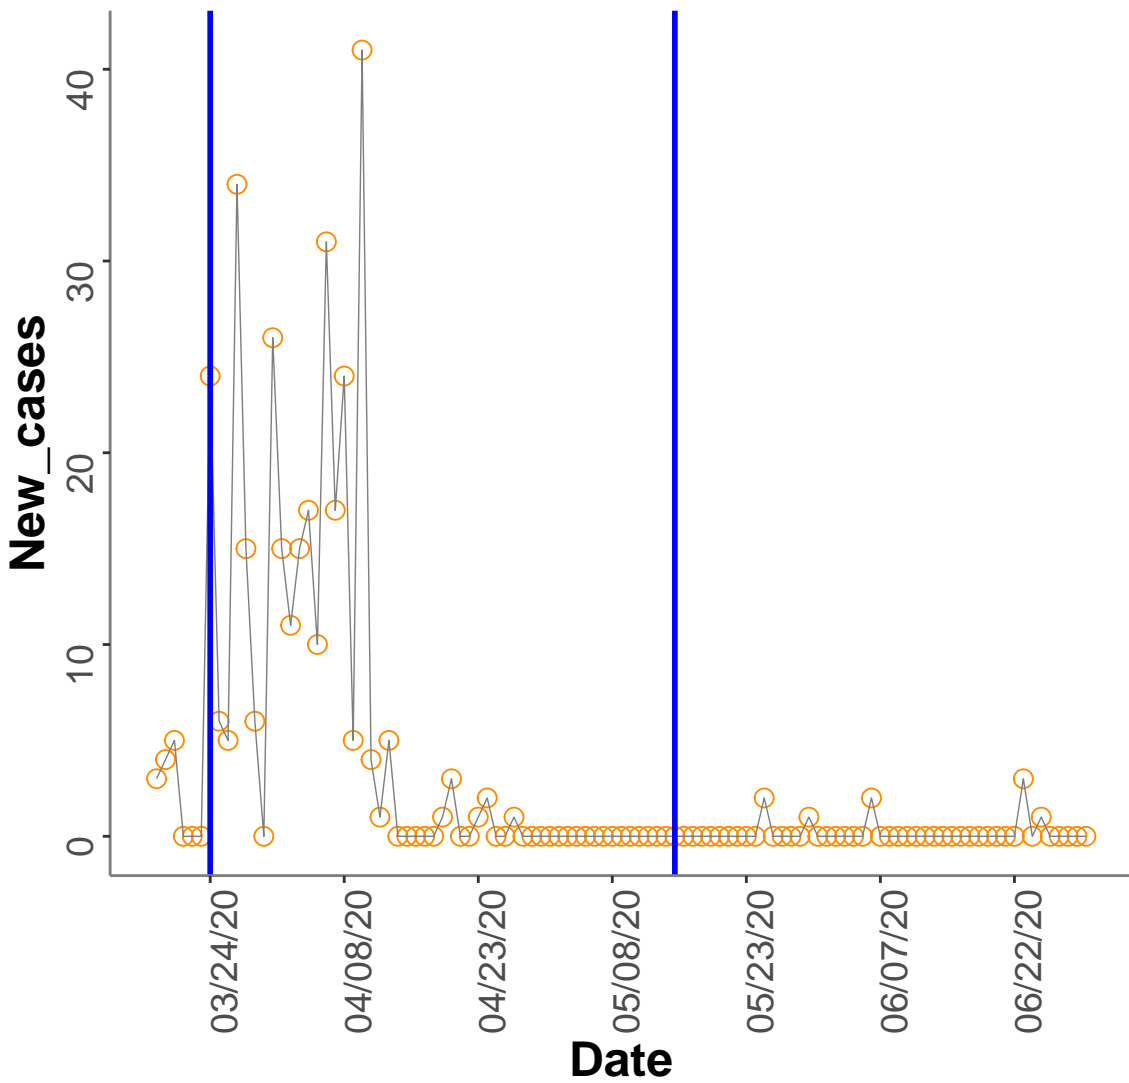

lockdown\_New\_cases\_Mexico

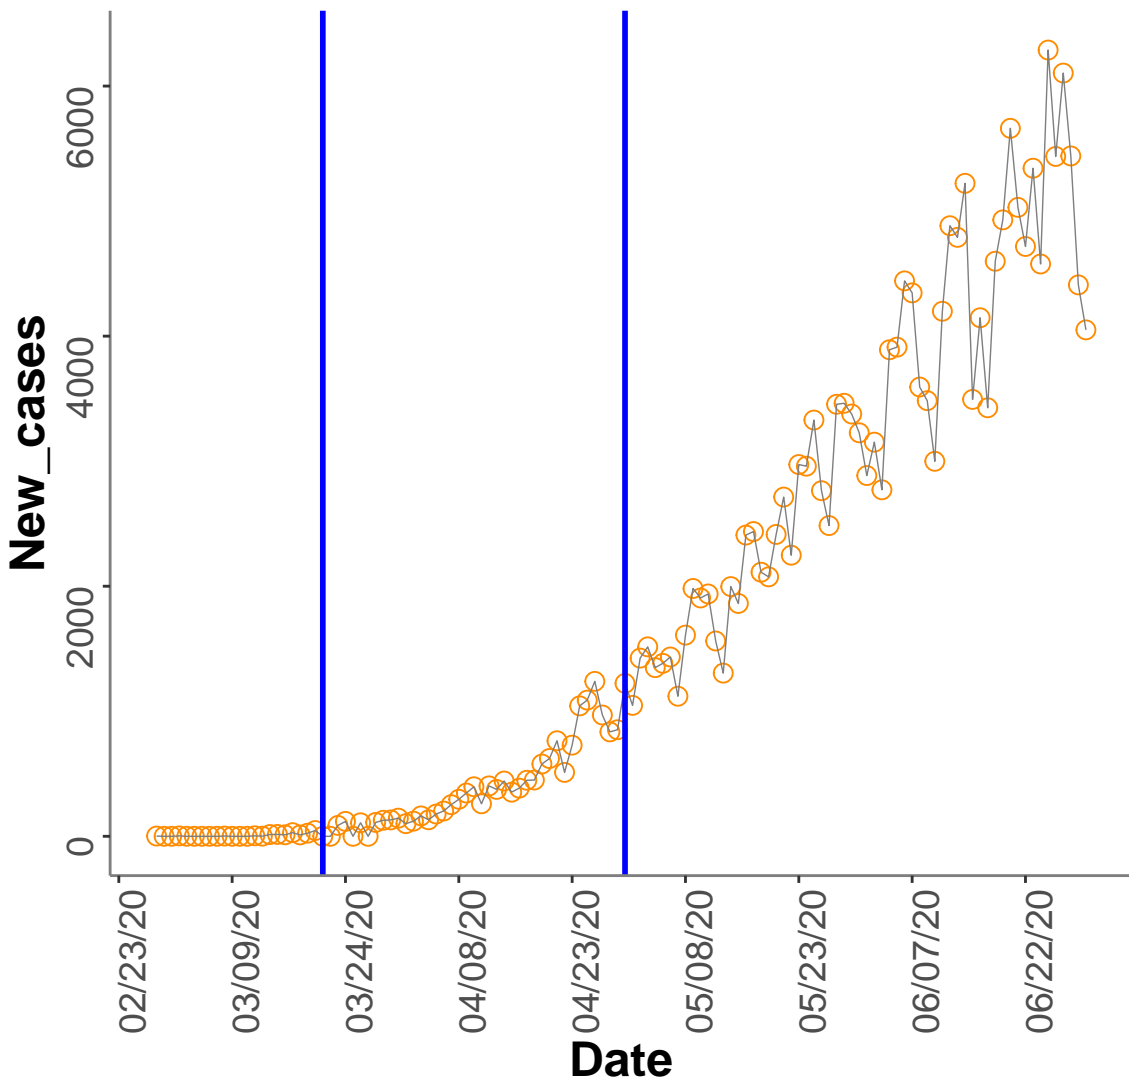

lockdown\_New\_cases\_Montenegro

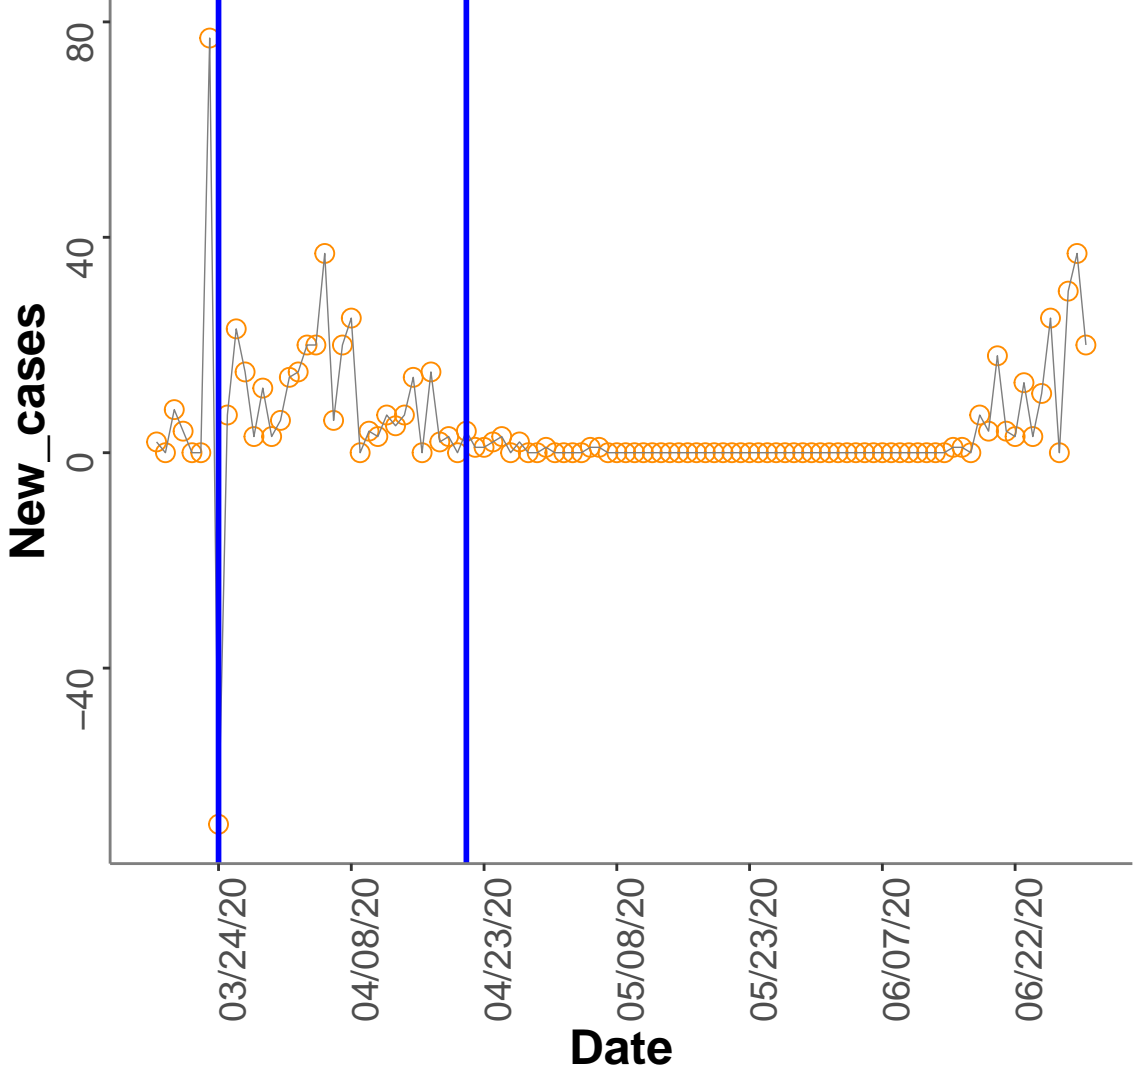

lockdown\_New\_cases\_Morocco

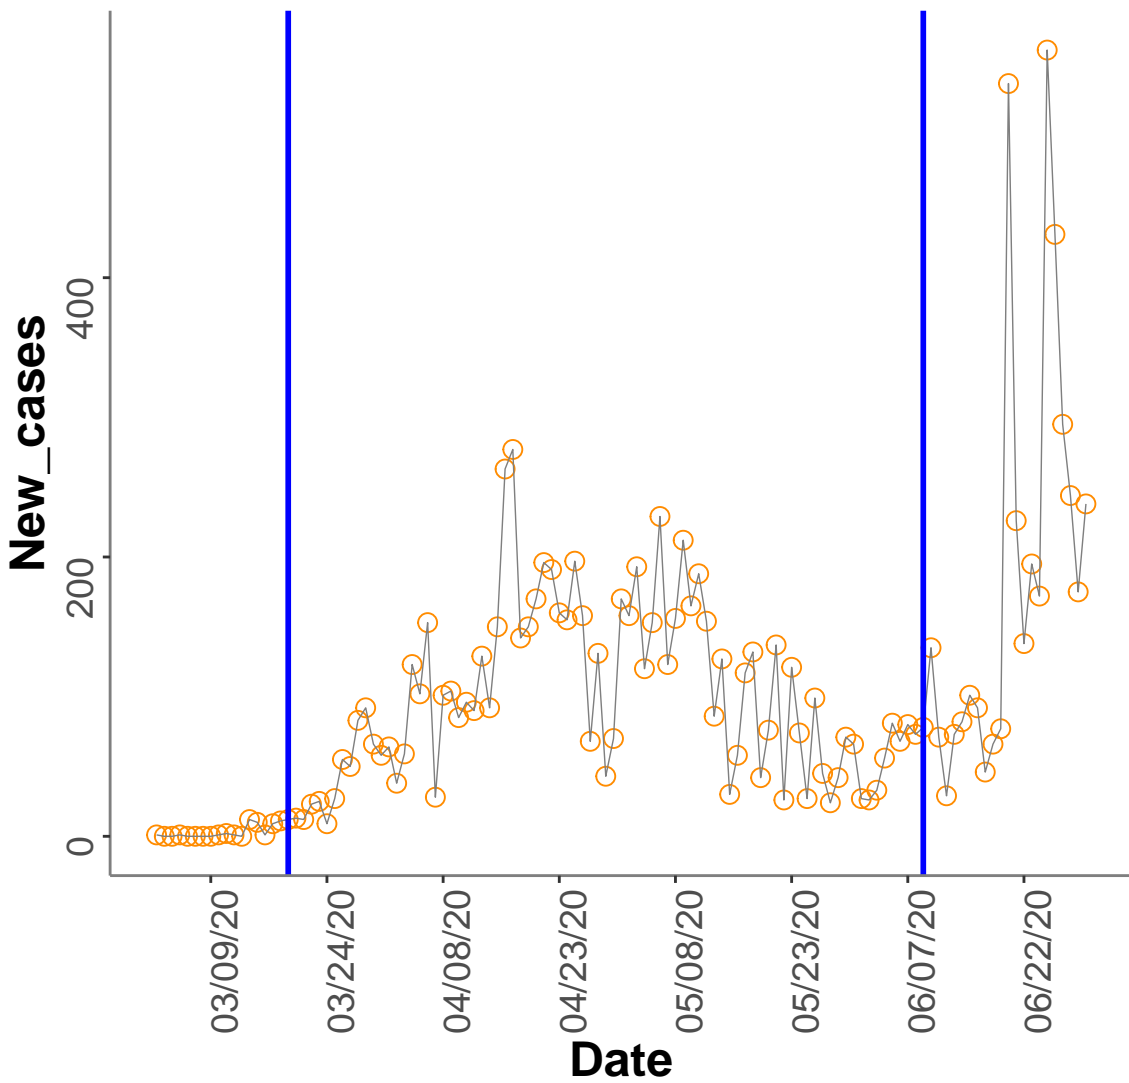

lockdown\_New\_cases\_Mozambique

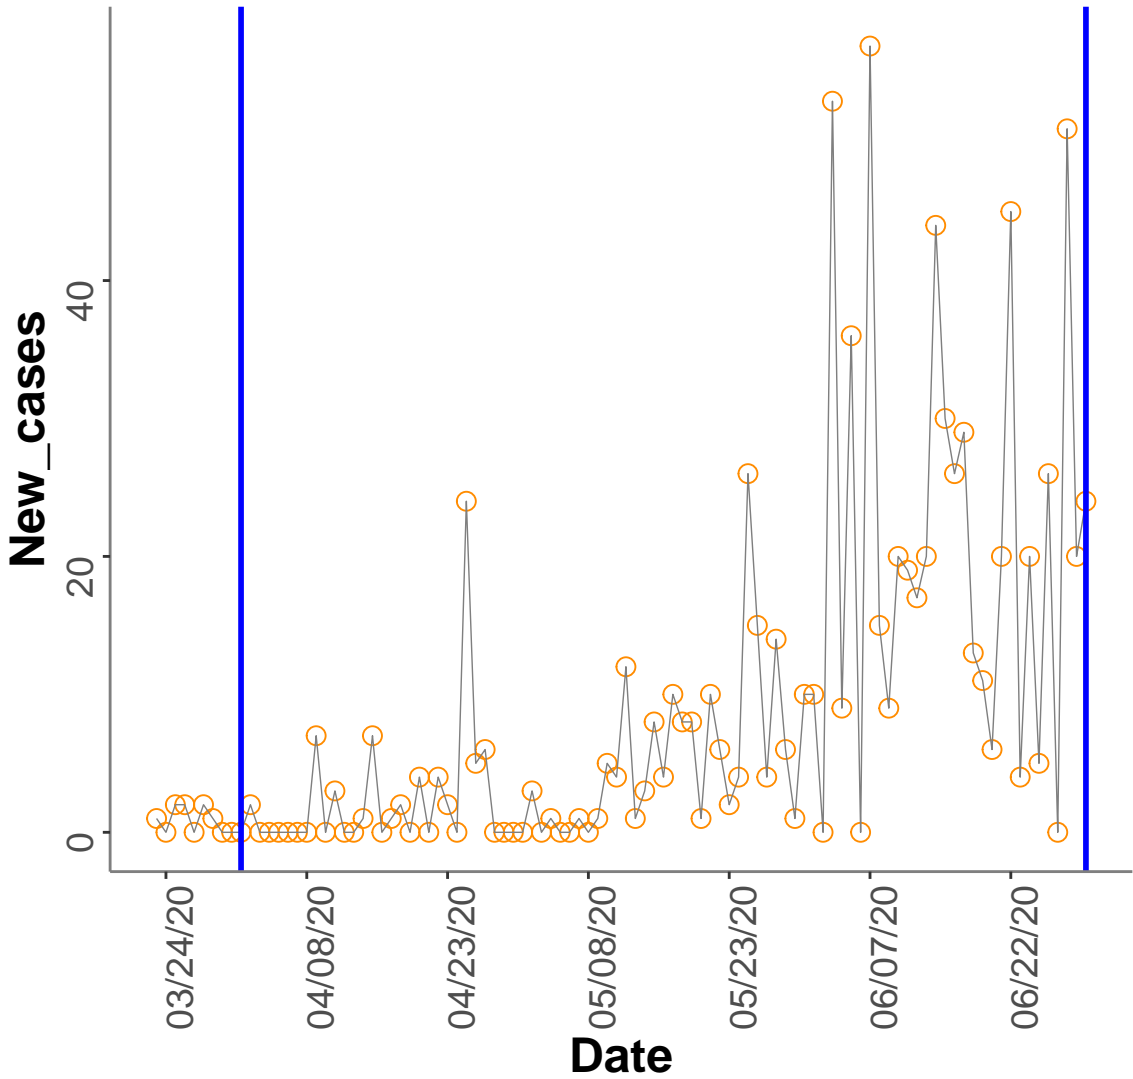

lockdown\_New\_cases\_Nepal

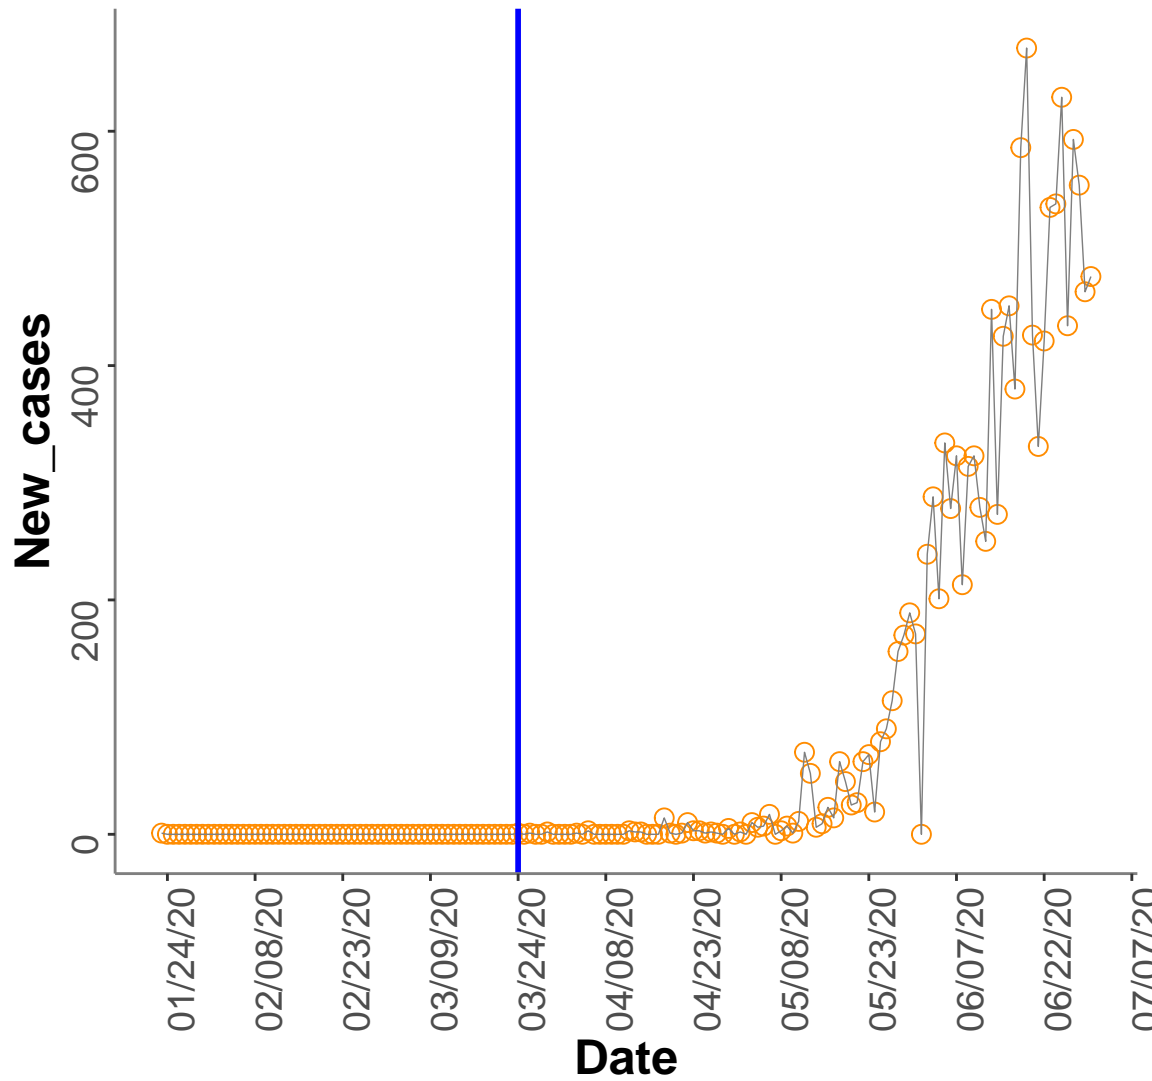



lockdown\_New\_cases\_Netherlands

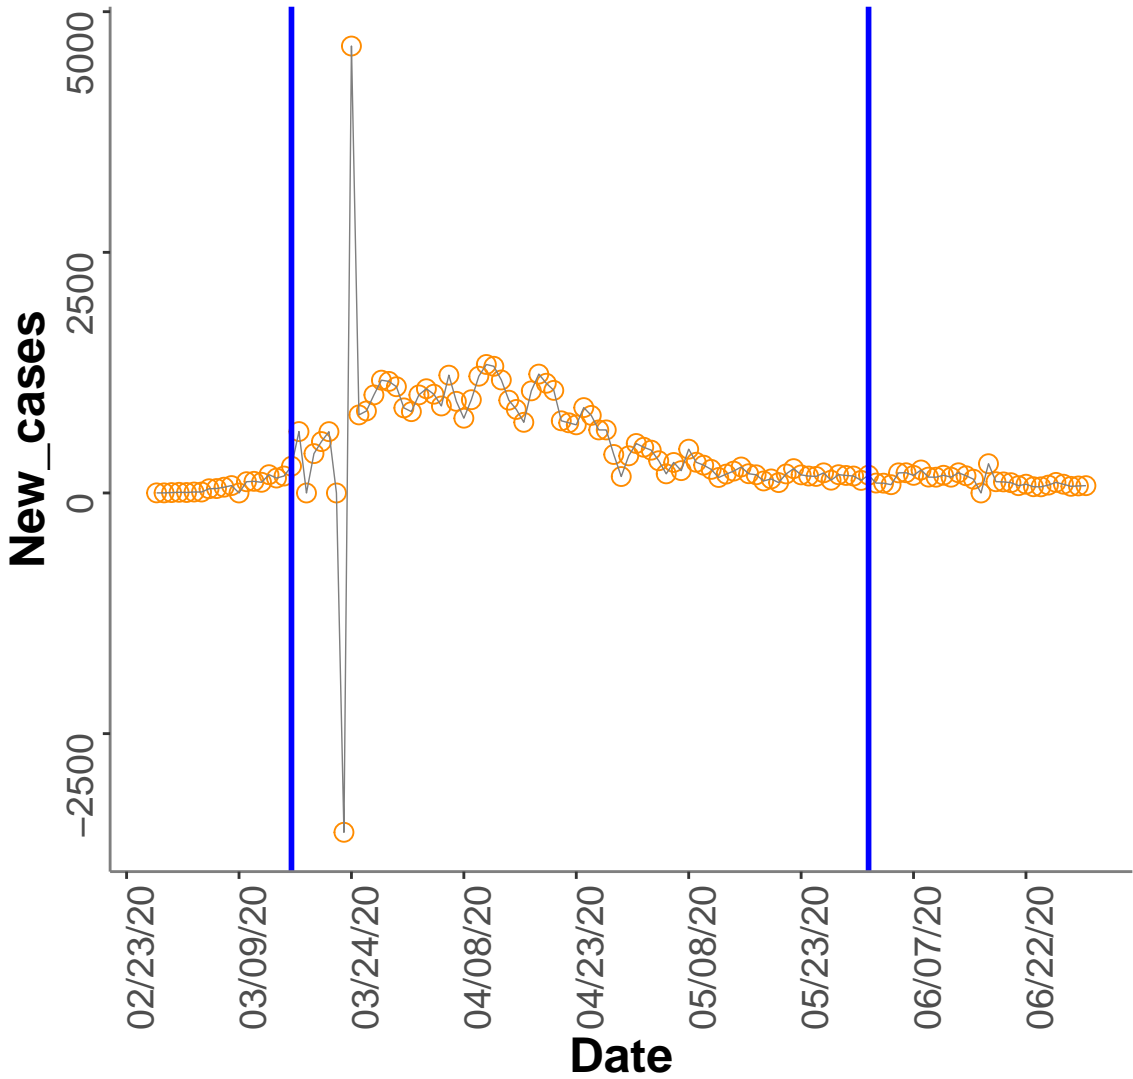

lockdown\_New\_cases\_New\_Zealand

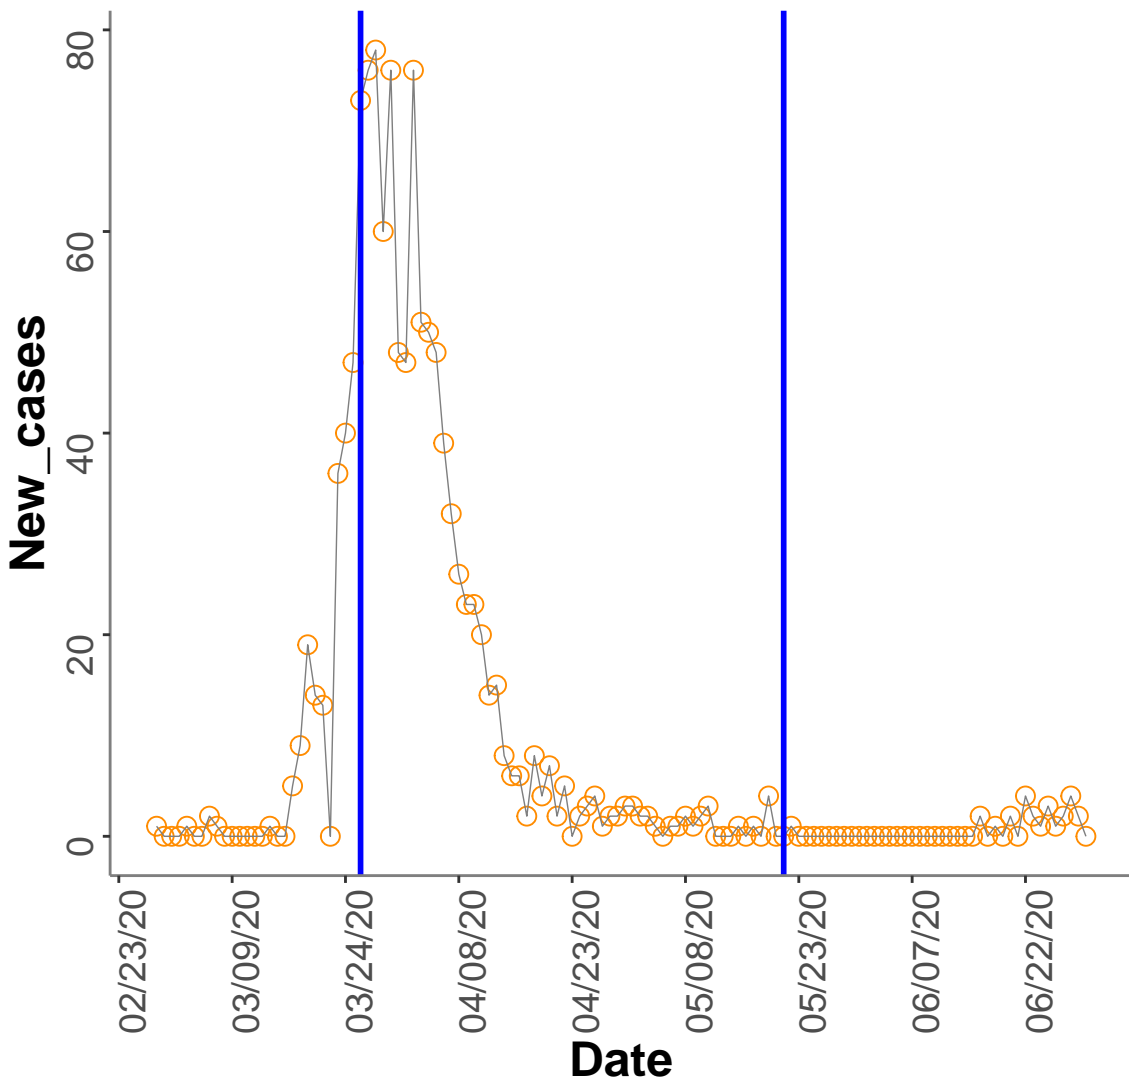

lockdown\_New\_cases\_Nigeria

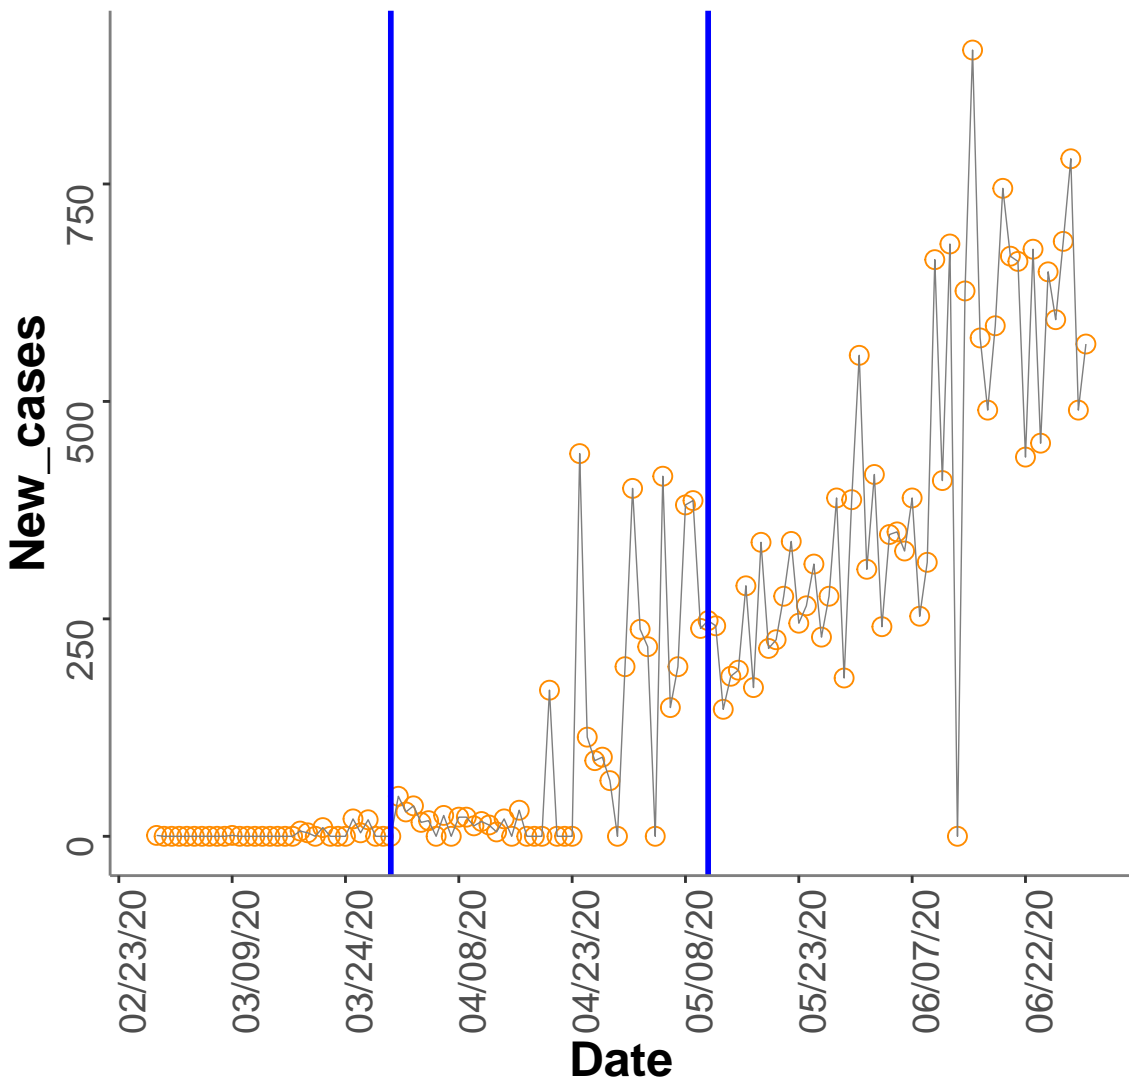

lockdown\_New\_cases\_Norway

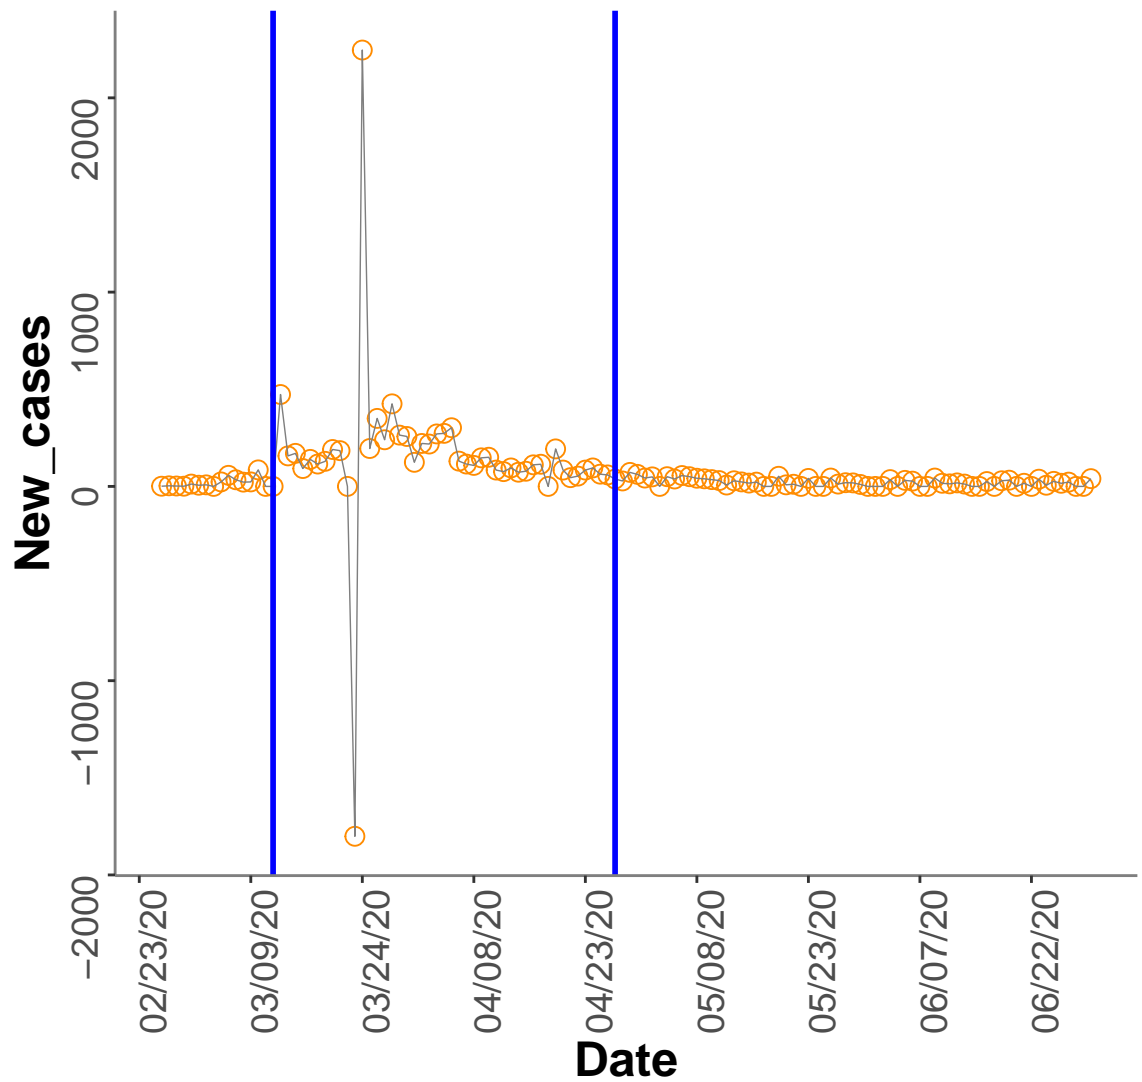

lockdown\_New\_cases\_Oman

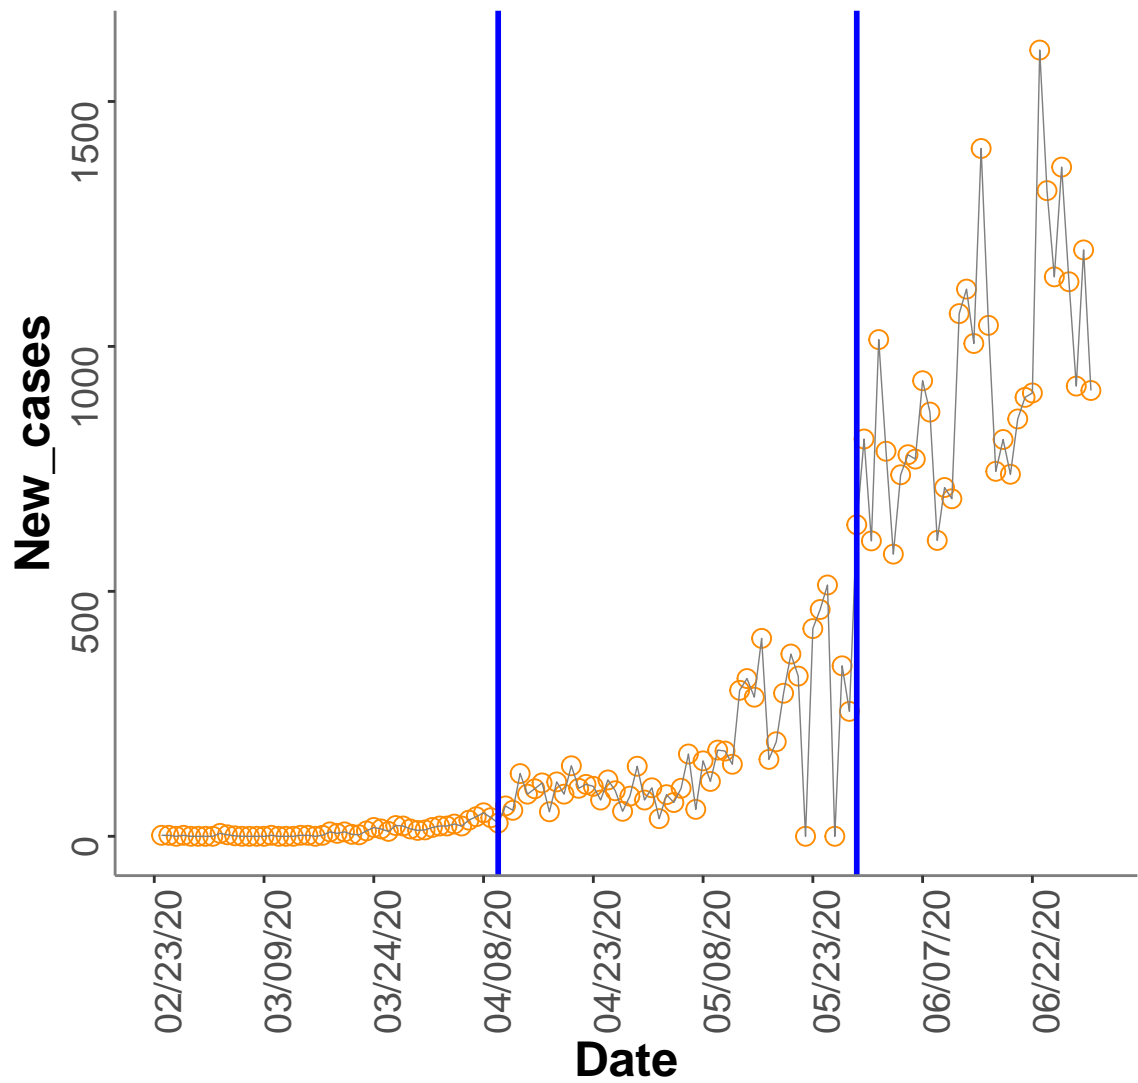

lockdown\_New\_cases\_Pakistan

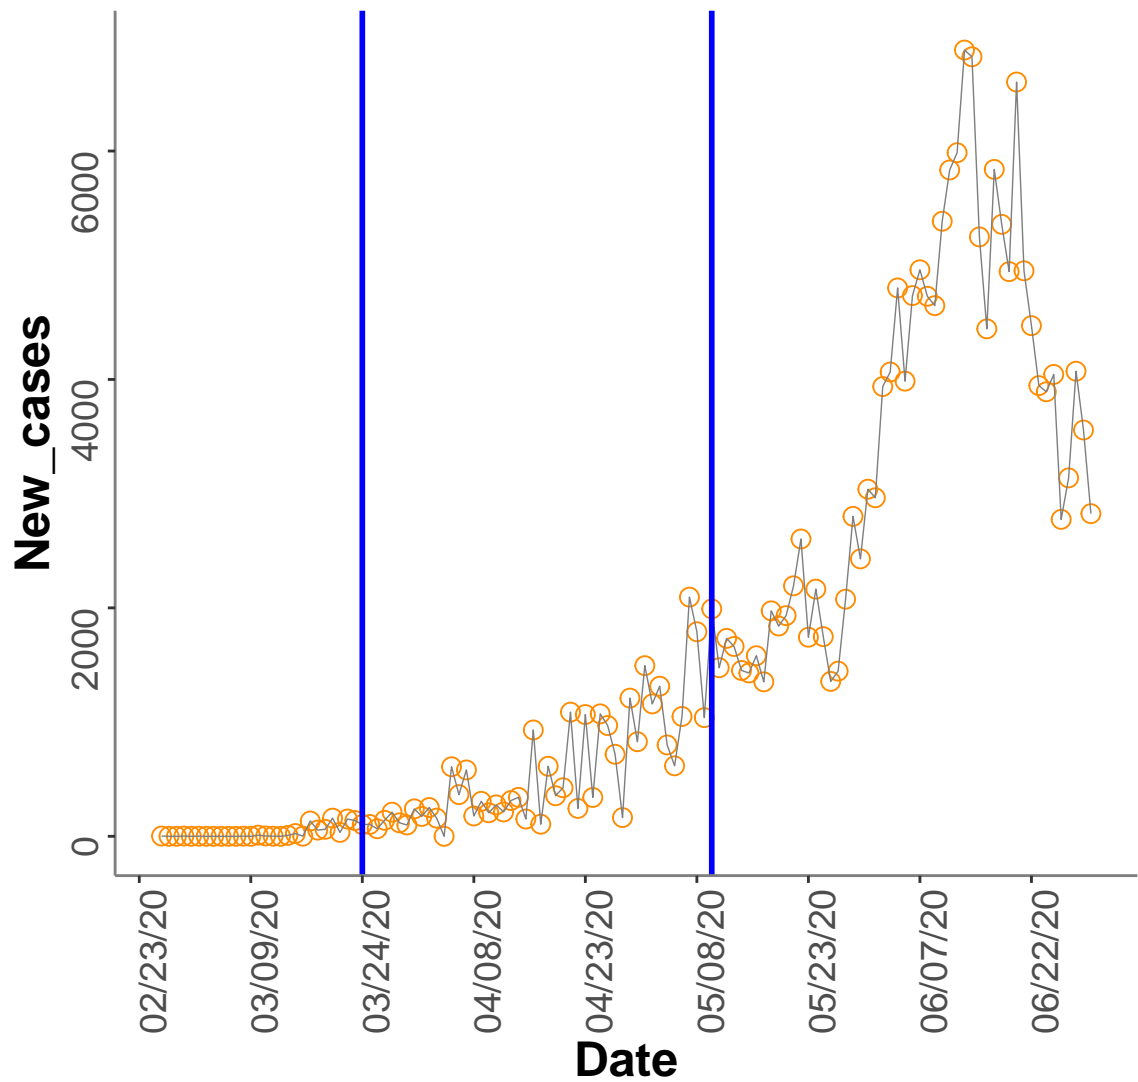

lockdown\_New\_cases\_Panama

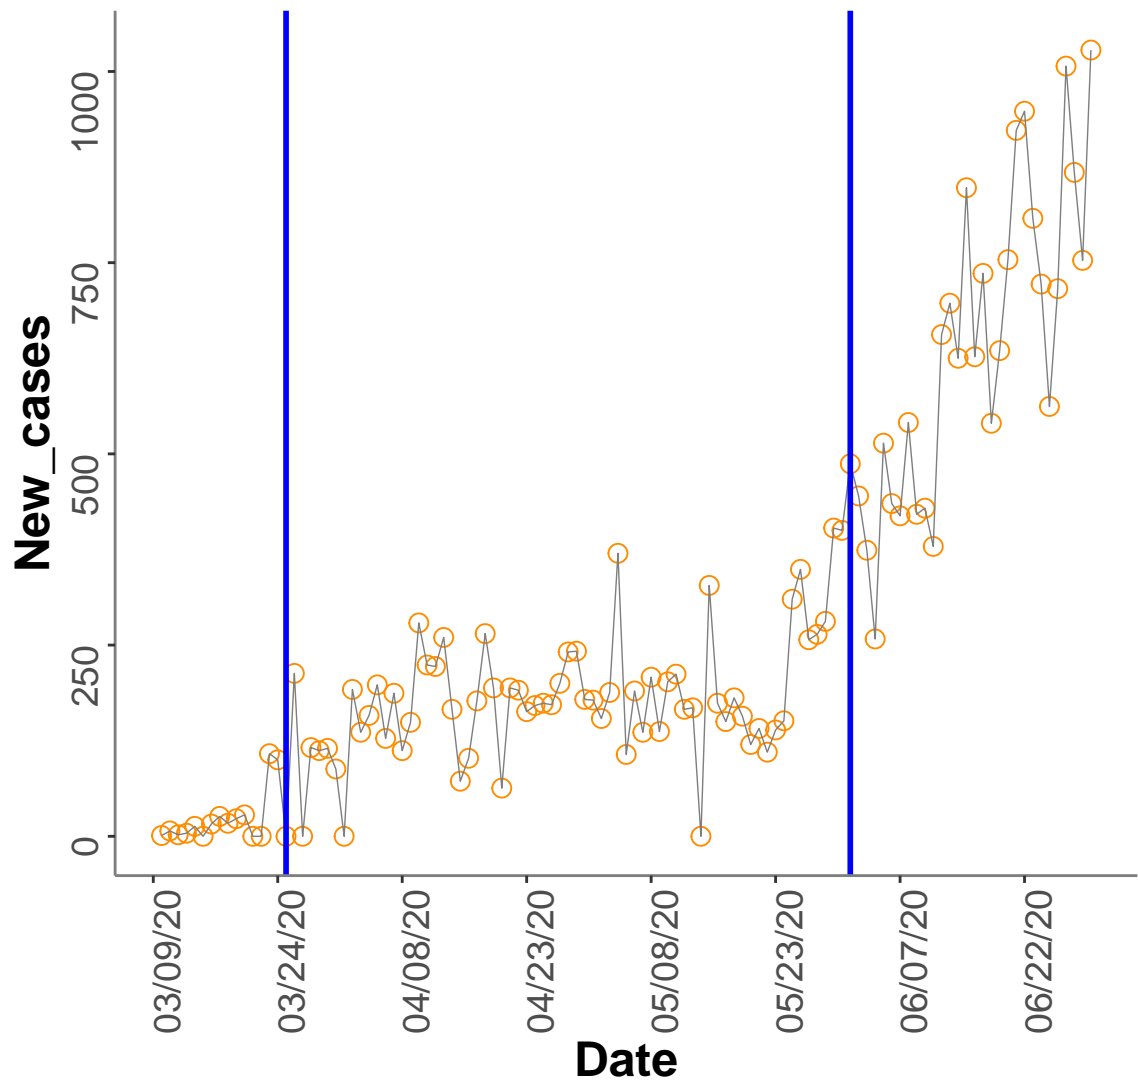

lockdown\_New\_cases\_Paraguay

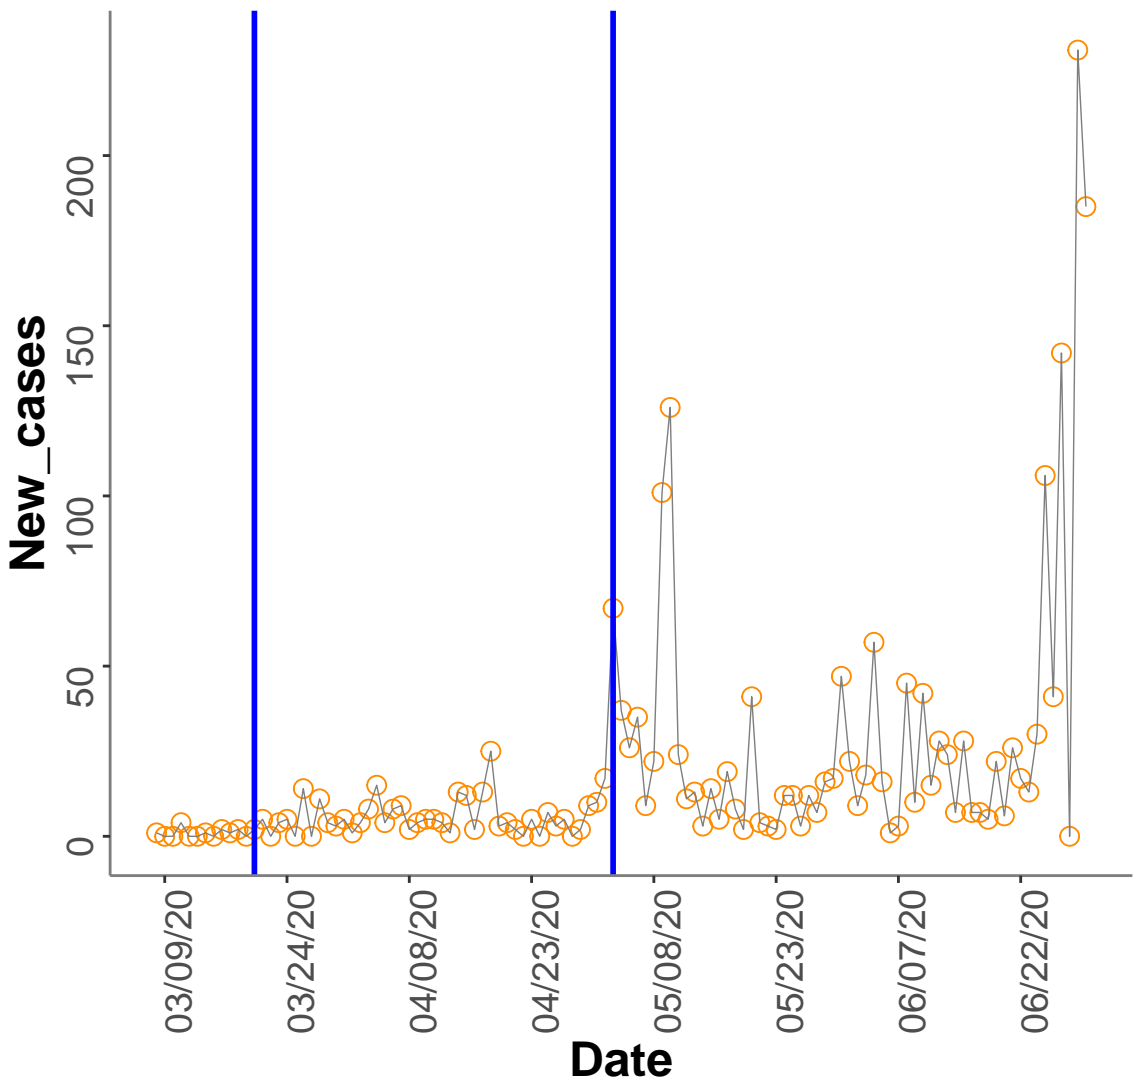



lockdown\_New\_cases\_Peru

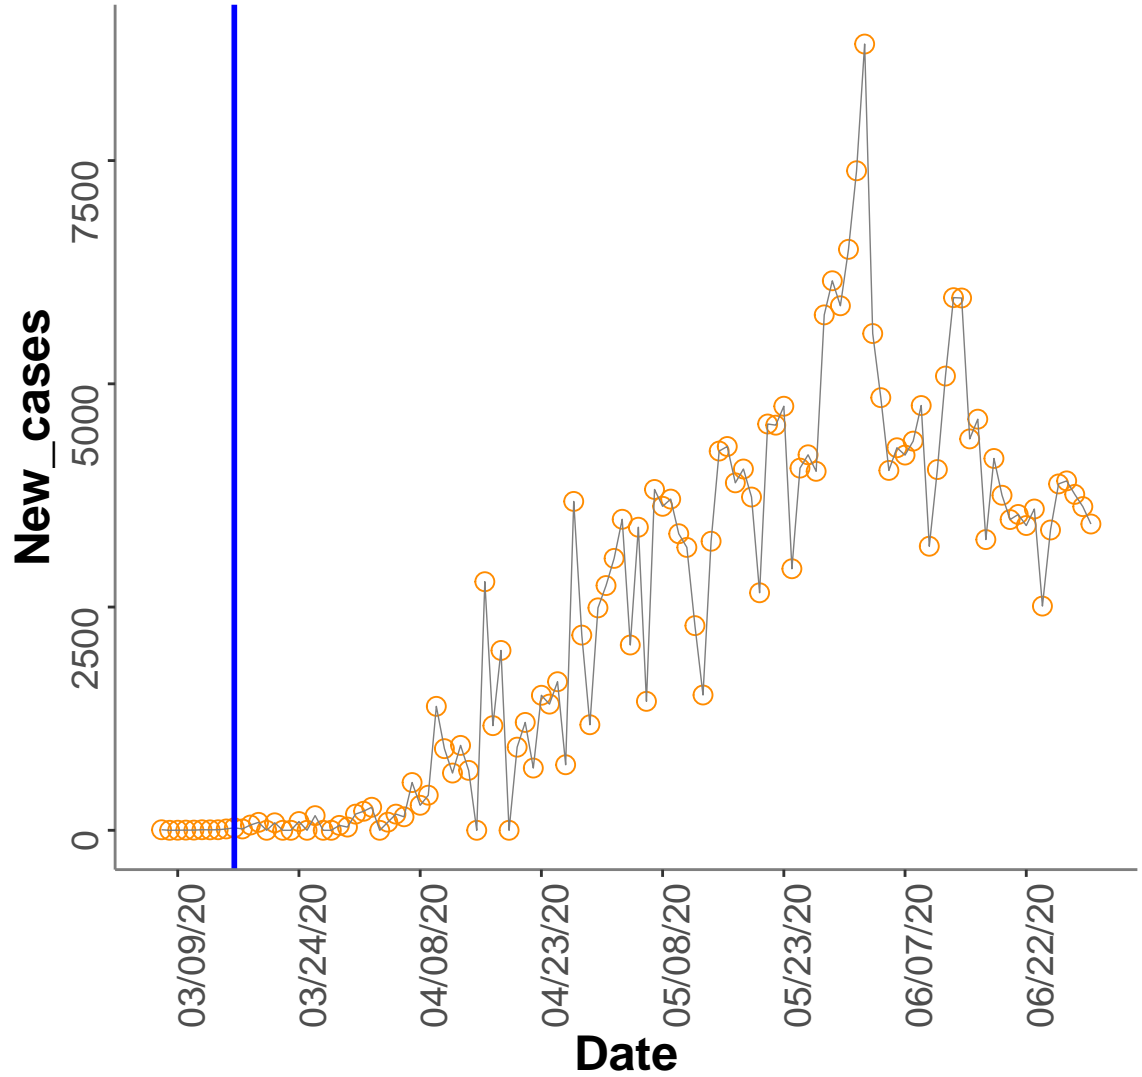

lockdown\_New\_cases\_Philippines

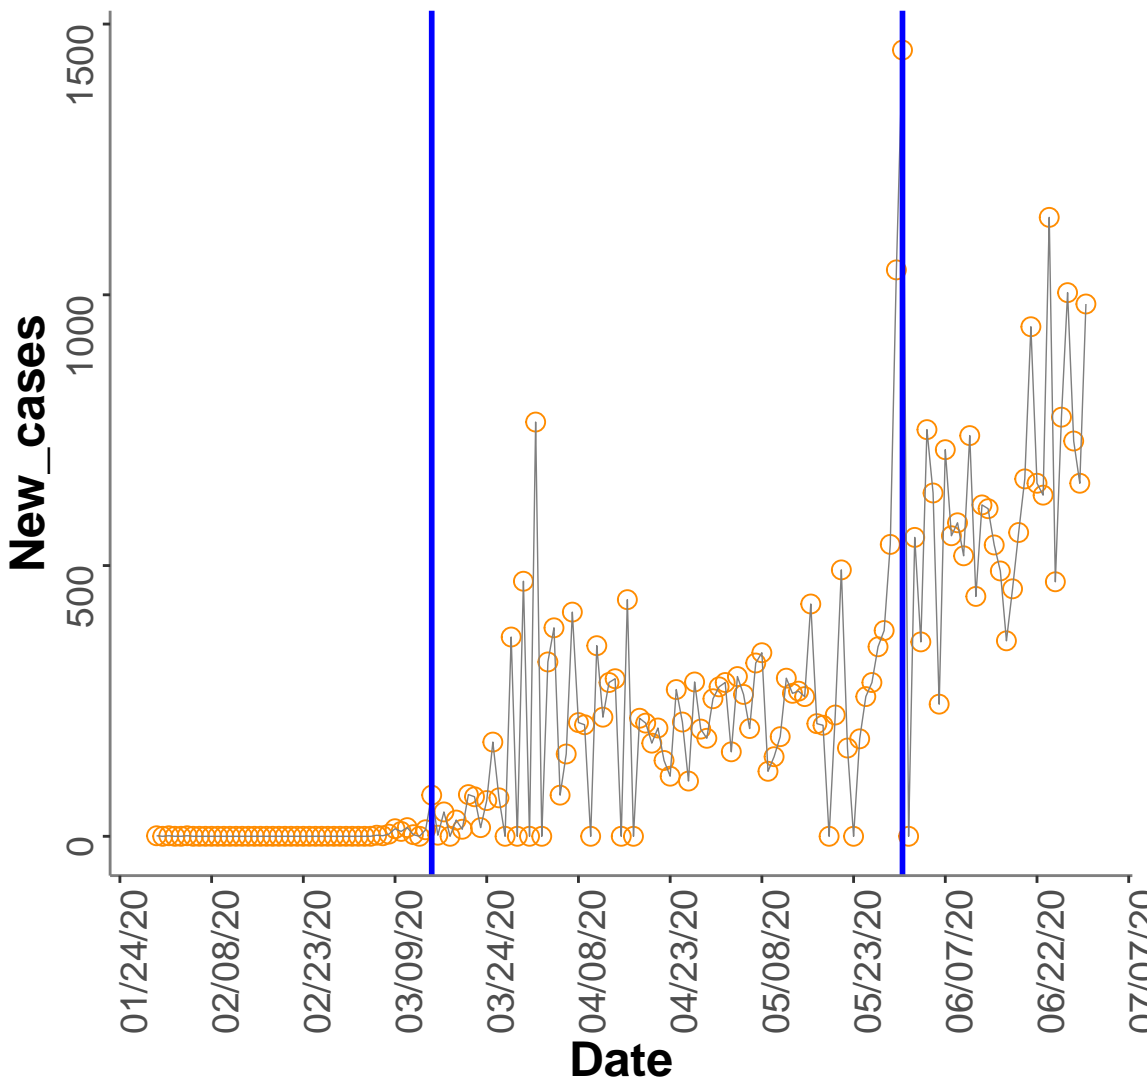

lockdown\_New\_cases\_Poland

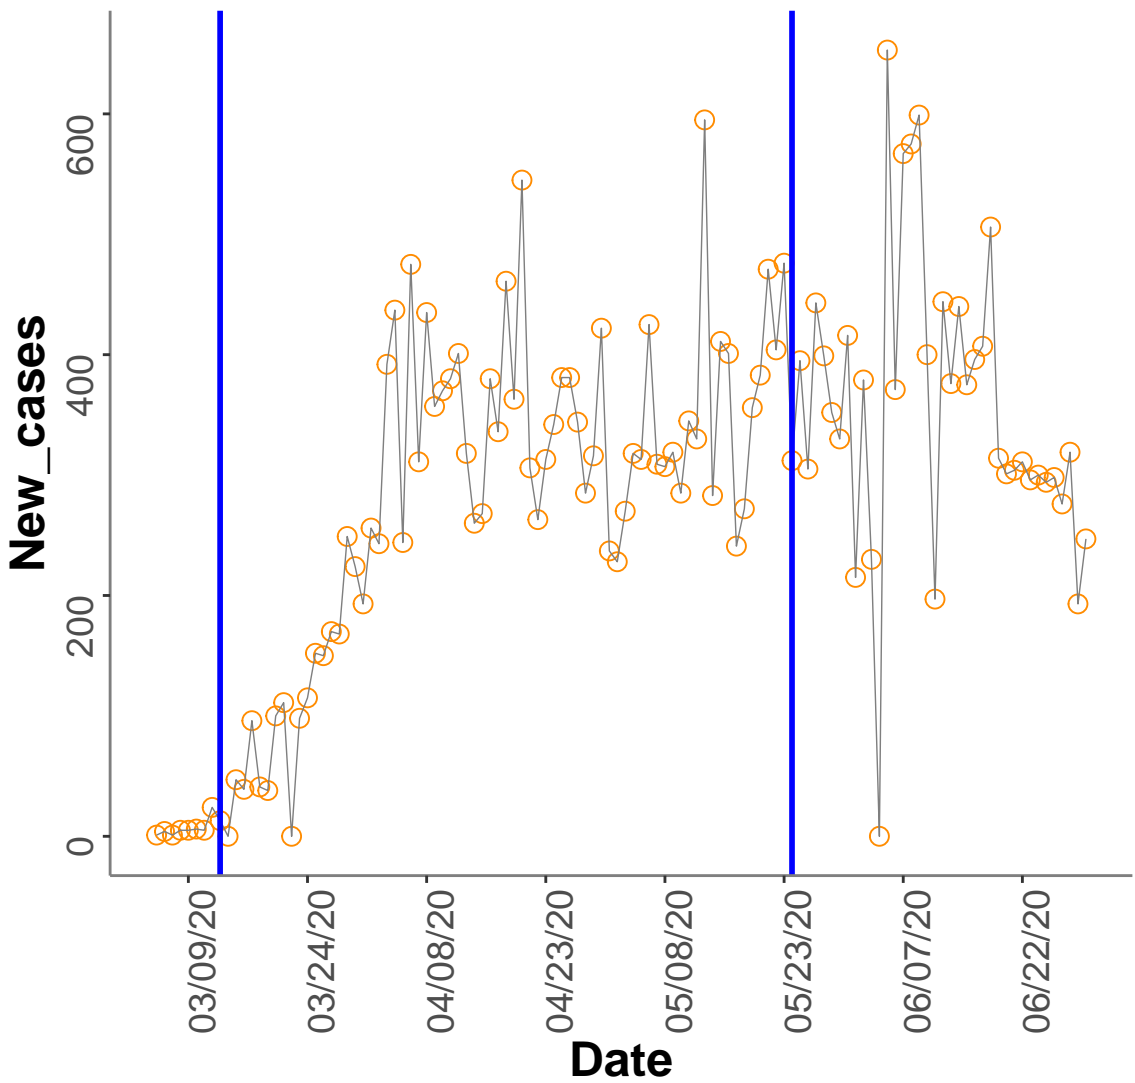

lockdown\_New\_cases\_Portugal

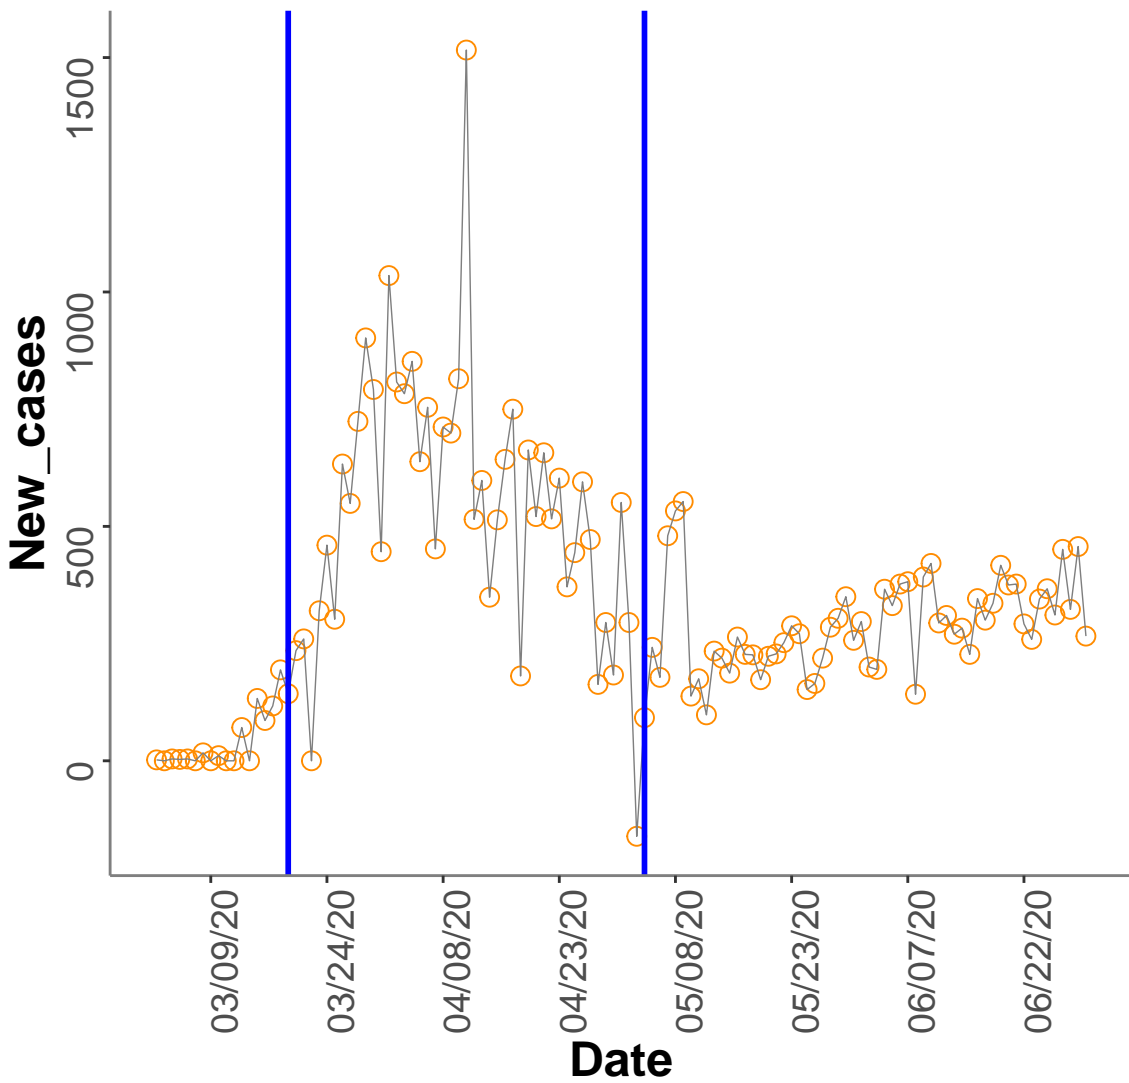

lockdown\_New\_cases\_Puerto\_Rico

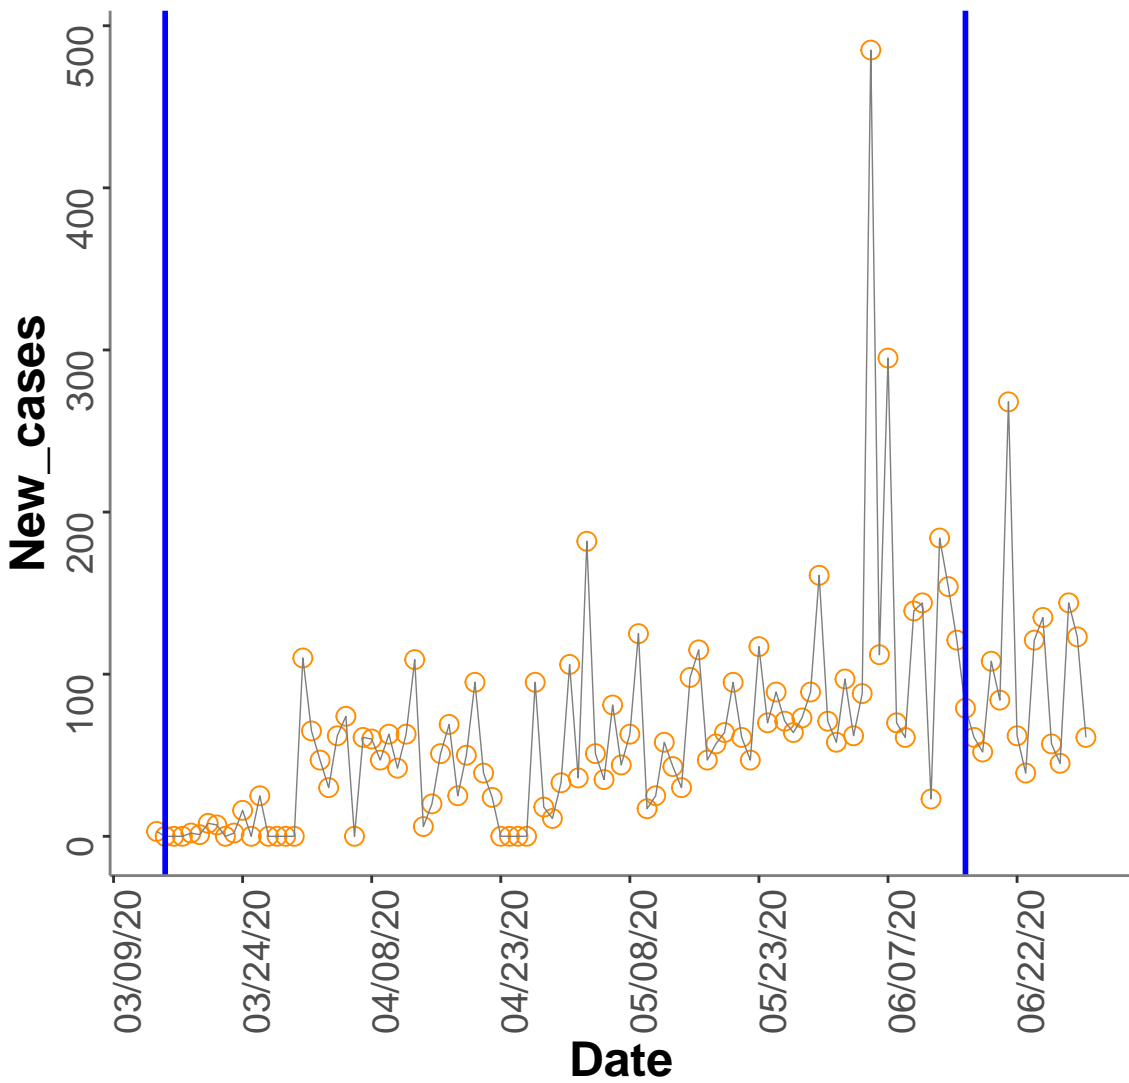

lockdown\_New\_cases\_Qatar

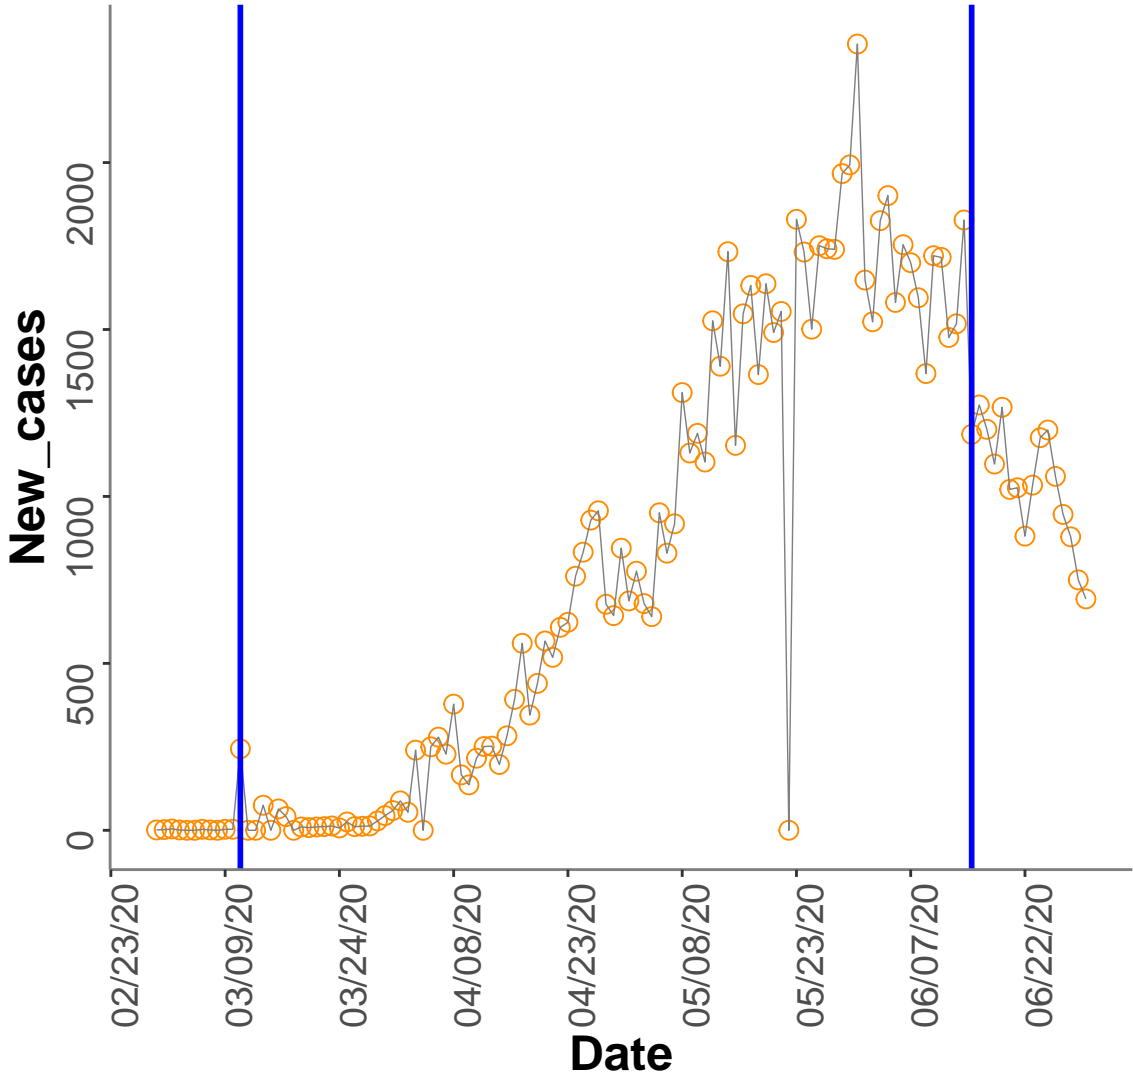

lockdown\_New\_cases\_Romania

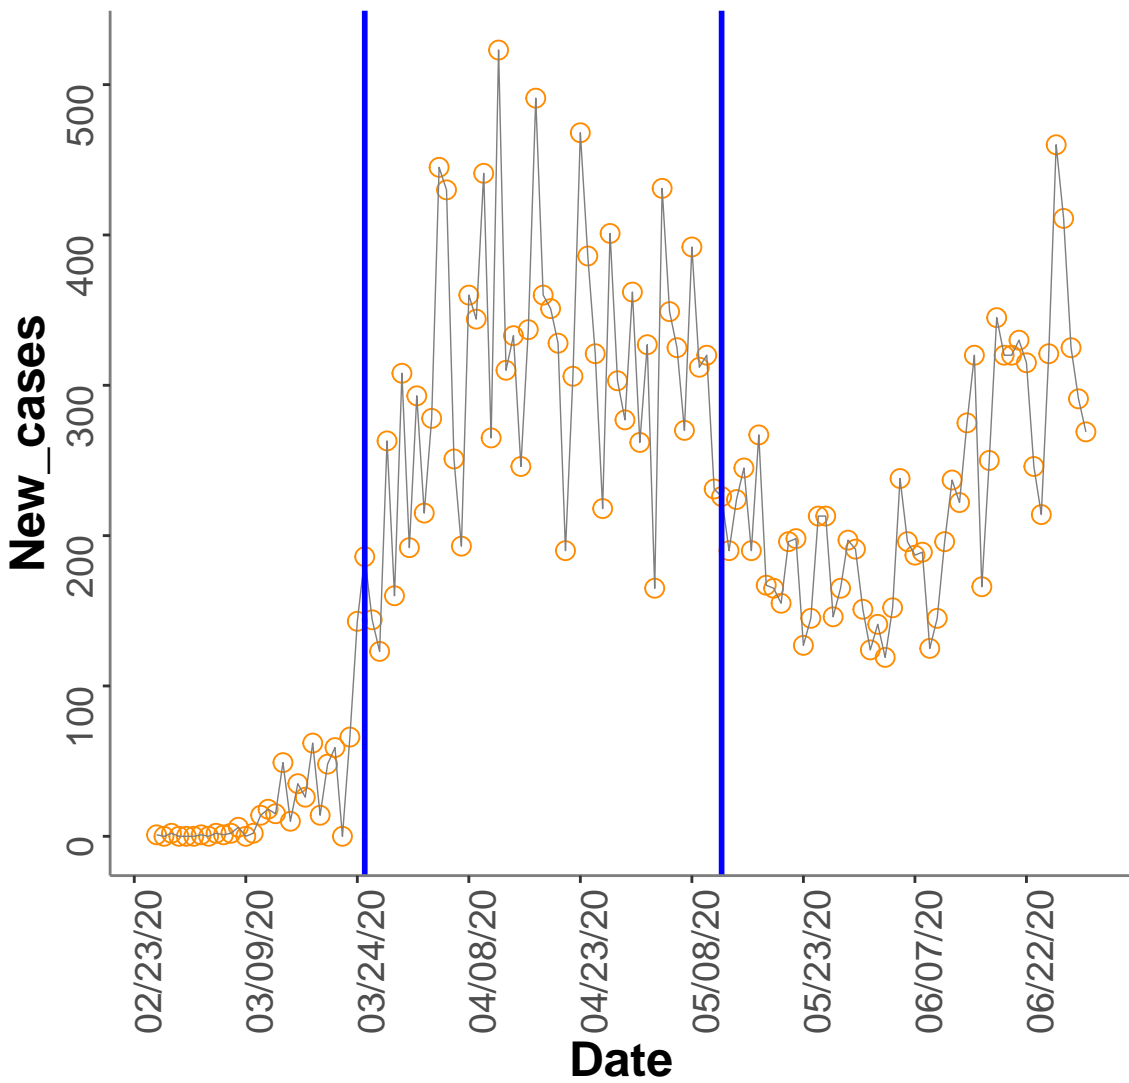

lockdown\_New\_cases\_Russia

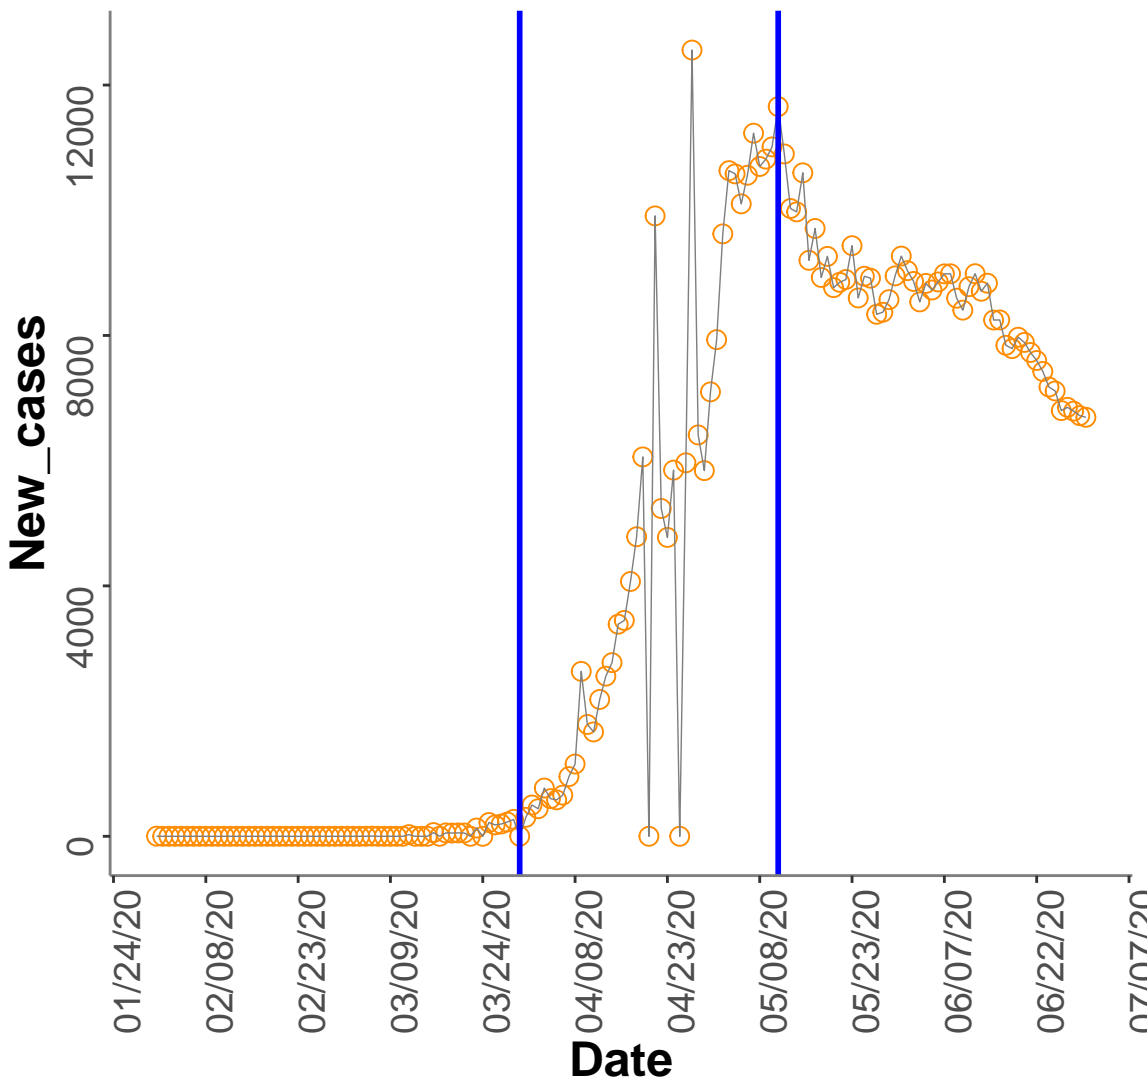



lockdown\_New\_cases\_Rwanda

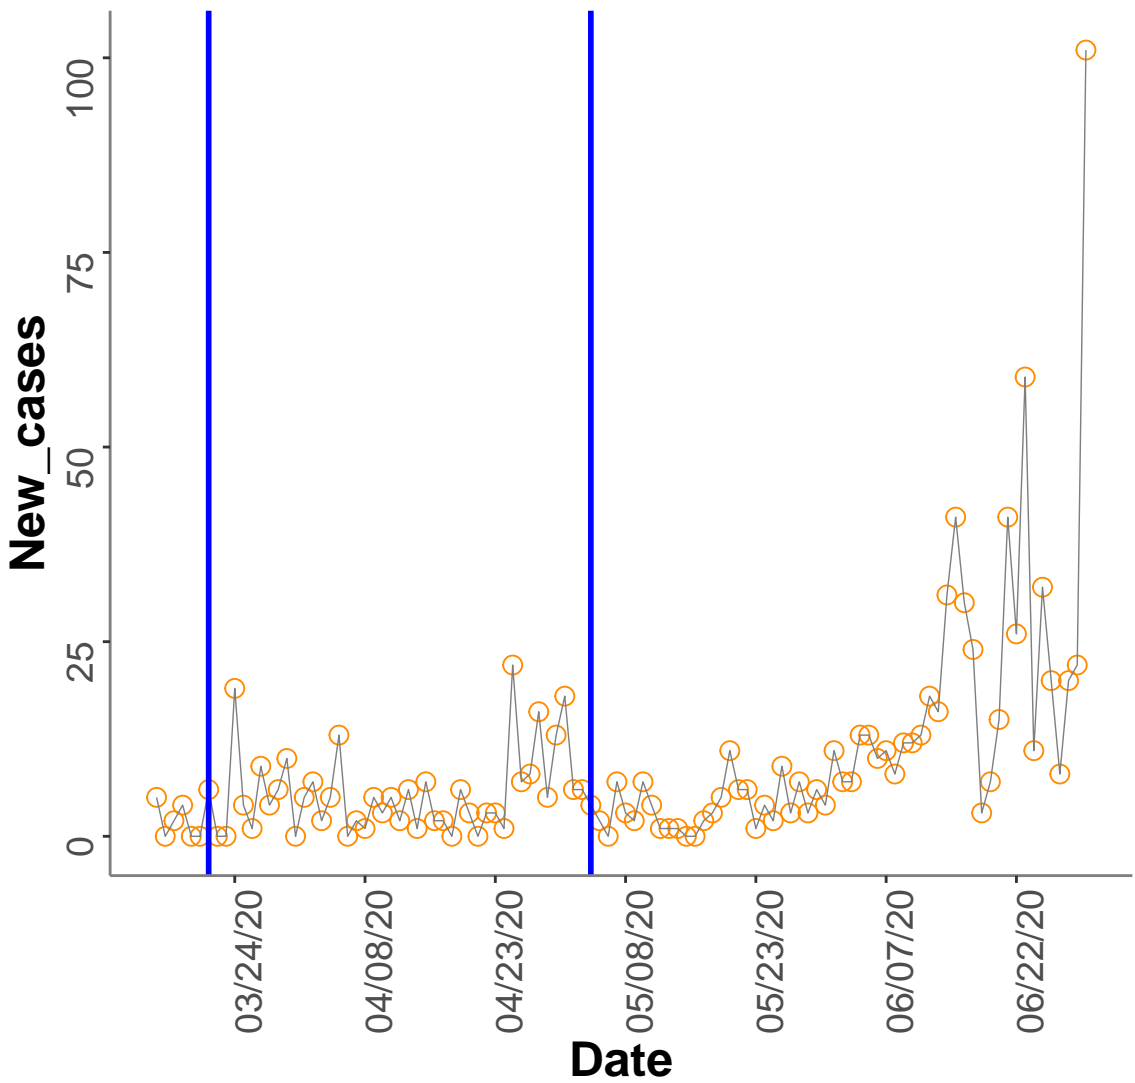

lockdown\_New\_cases\_Saudi\_Arabia

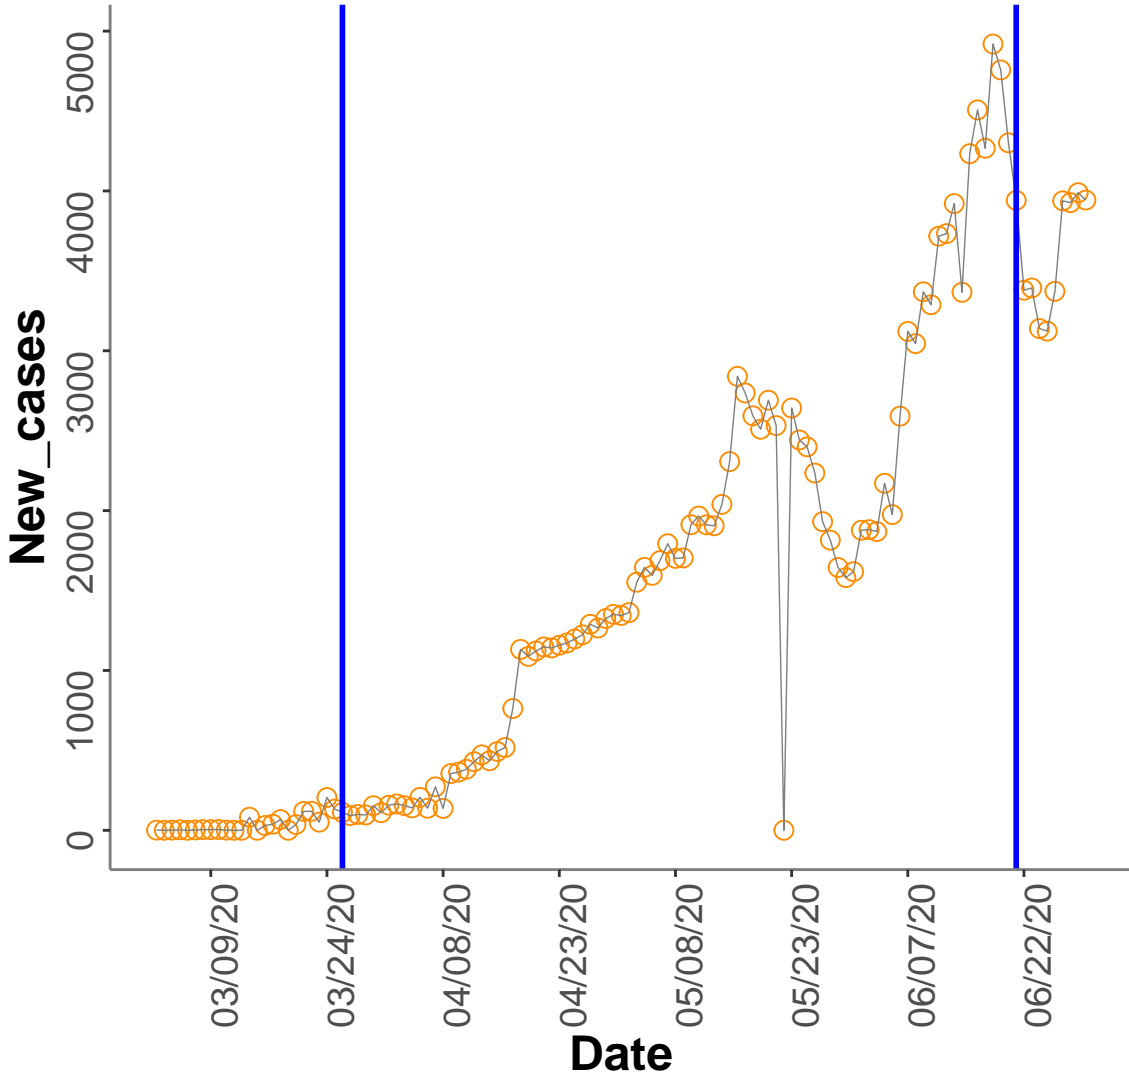

lockdown\_New\_cases\_Senegal

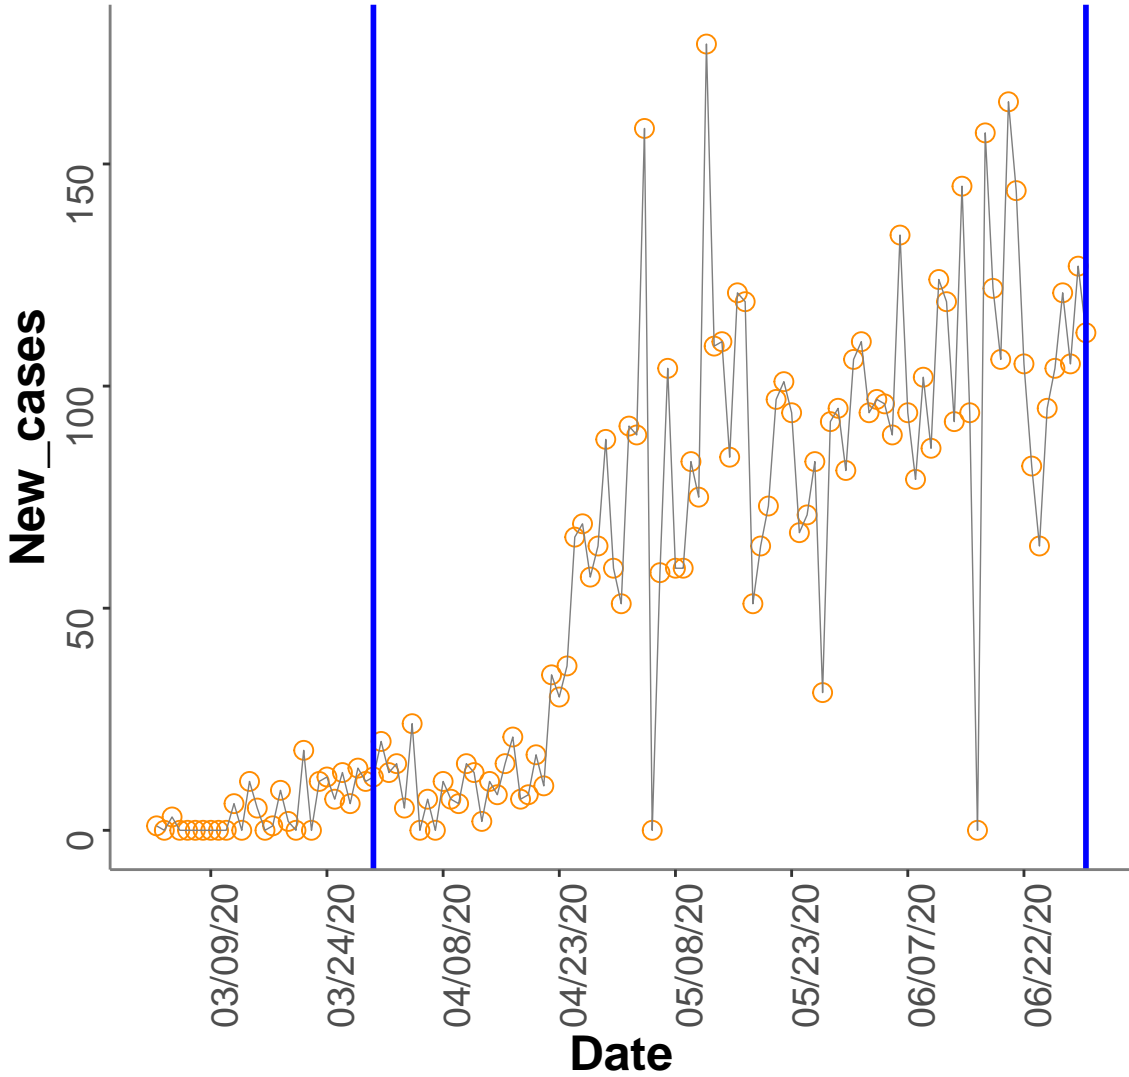

lockdown\_New\_cases\_Serbia

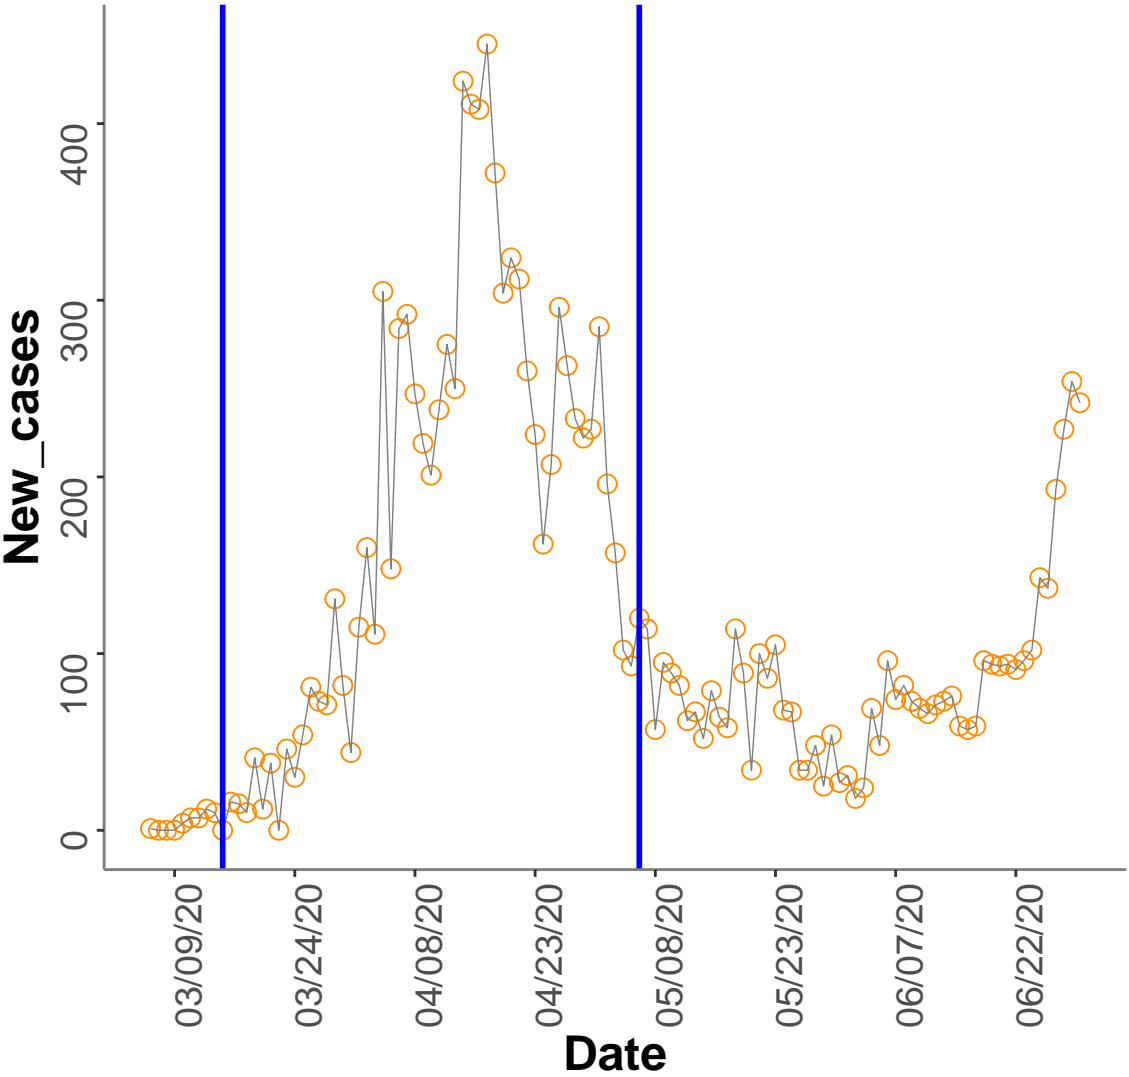

lockdown\_New\_cases\_Sierra\_Leone

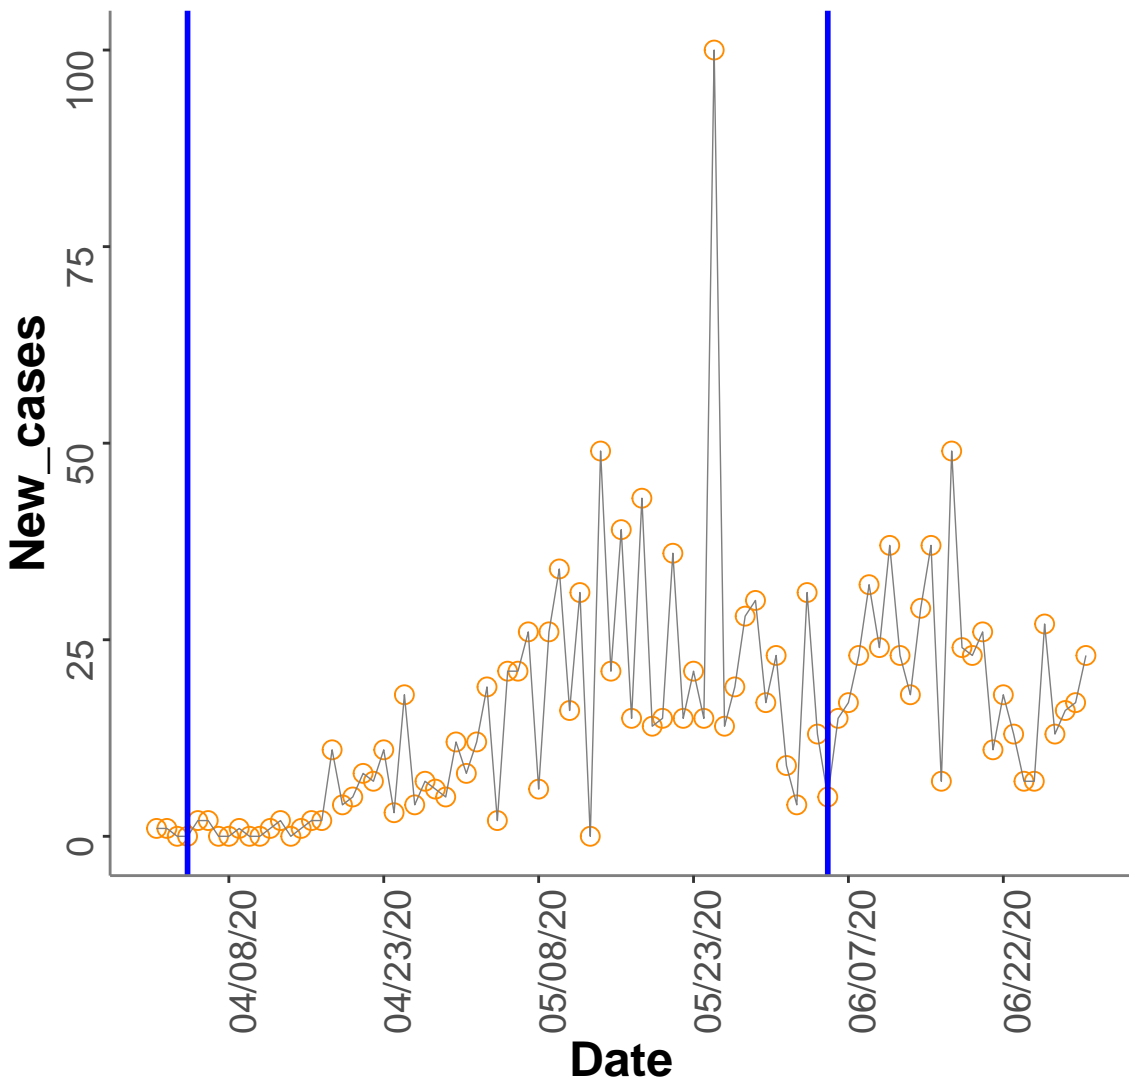

lockdown\_New\_cases\_Singapore

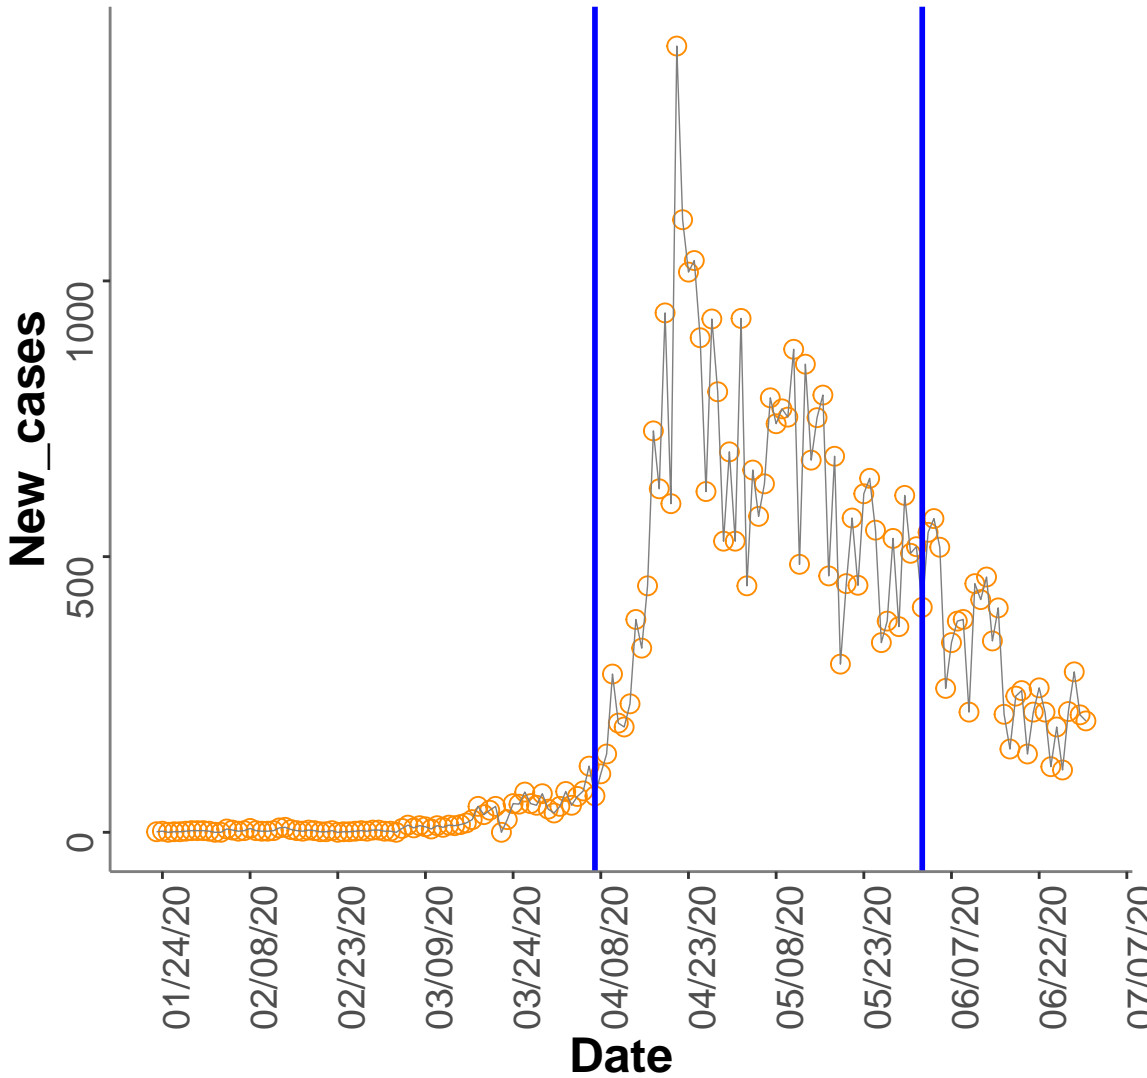

lockdown\_New\_cases\_Slovakia

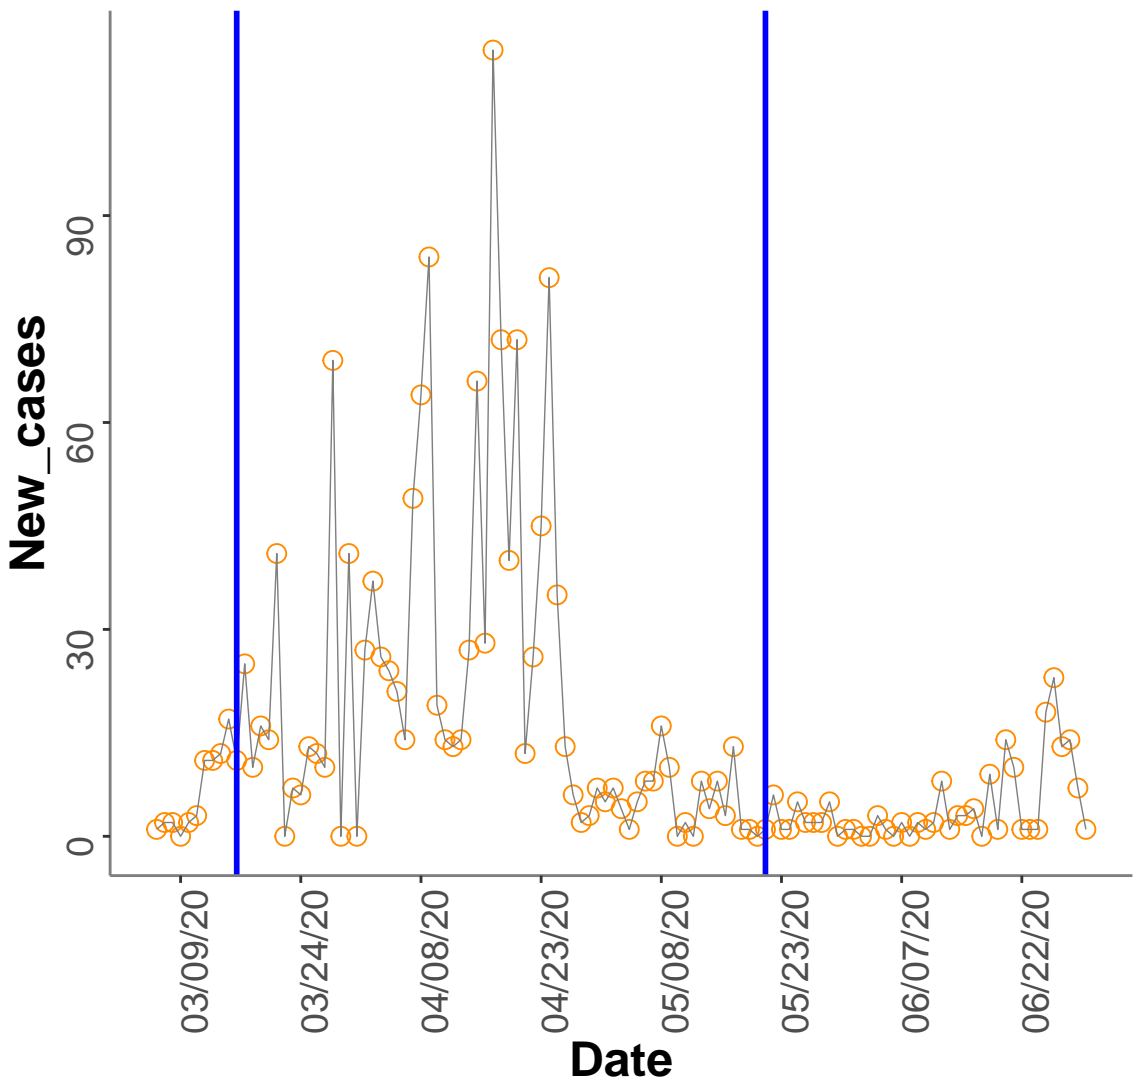

lockdown\_New\_cases\_Slovenia

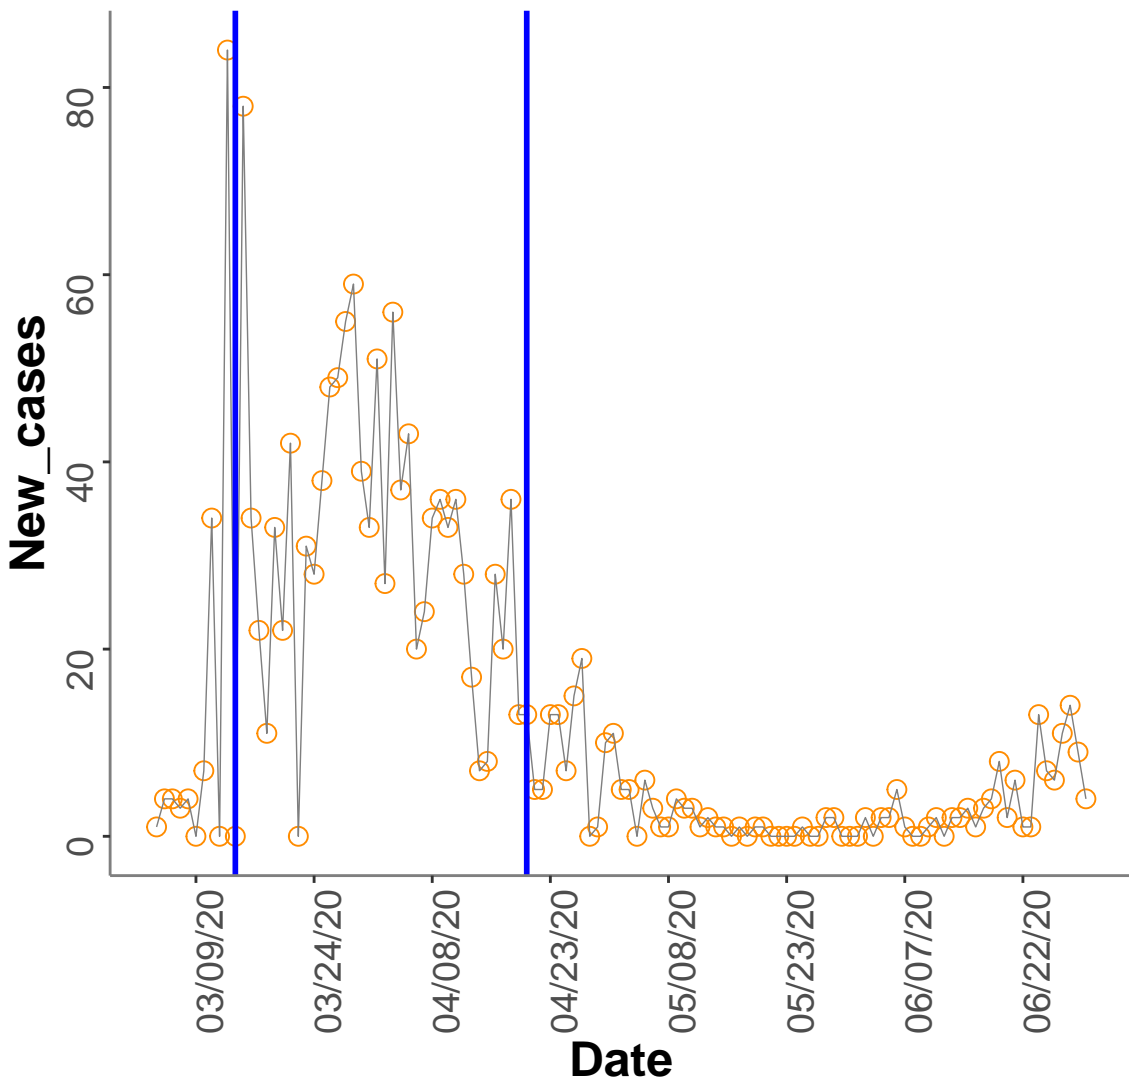



lockdown\_New\_cases\_South\_Africa

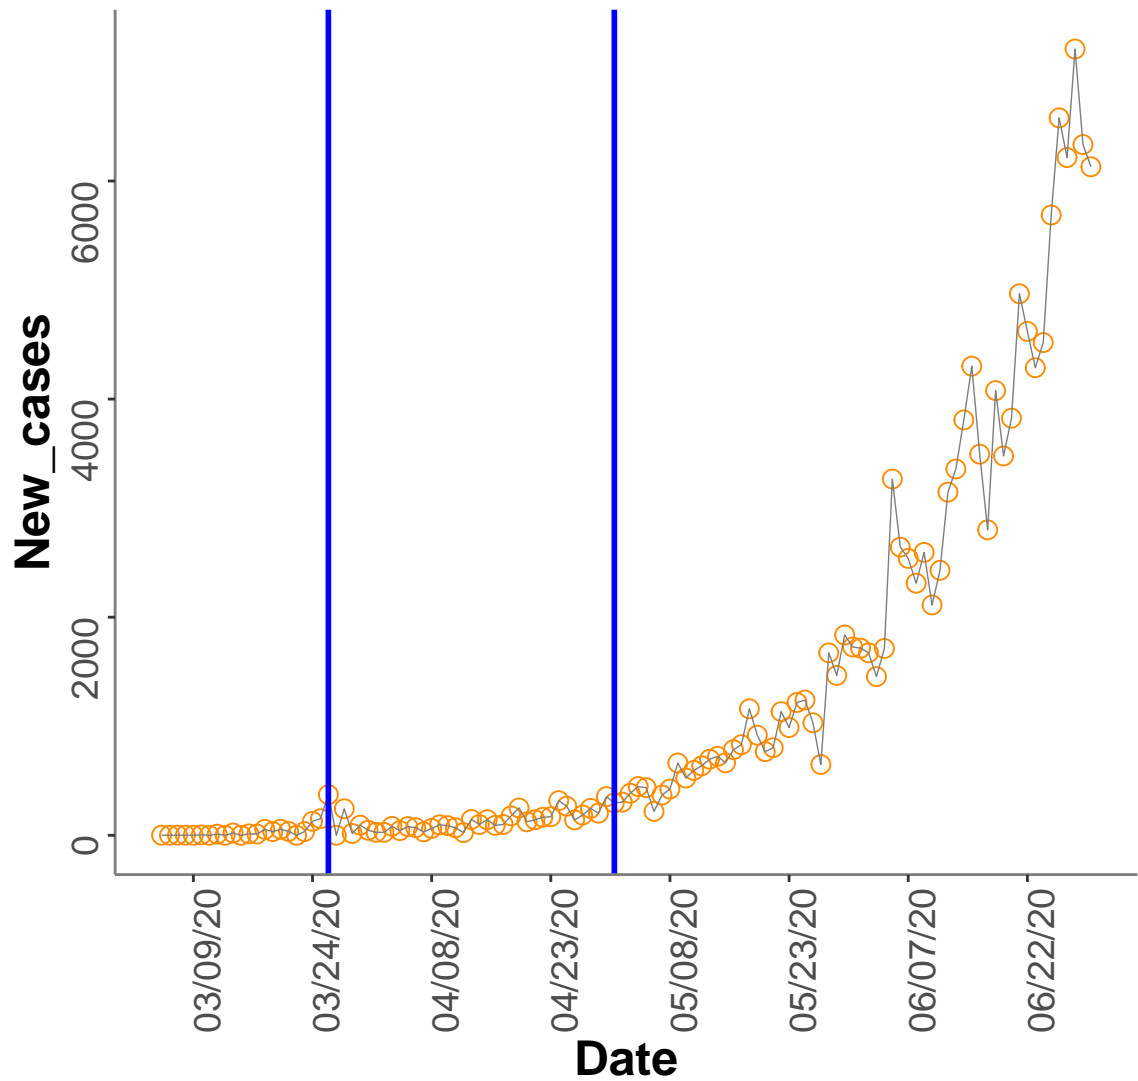

lockdown\_New\_cases\_Spain

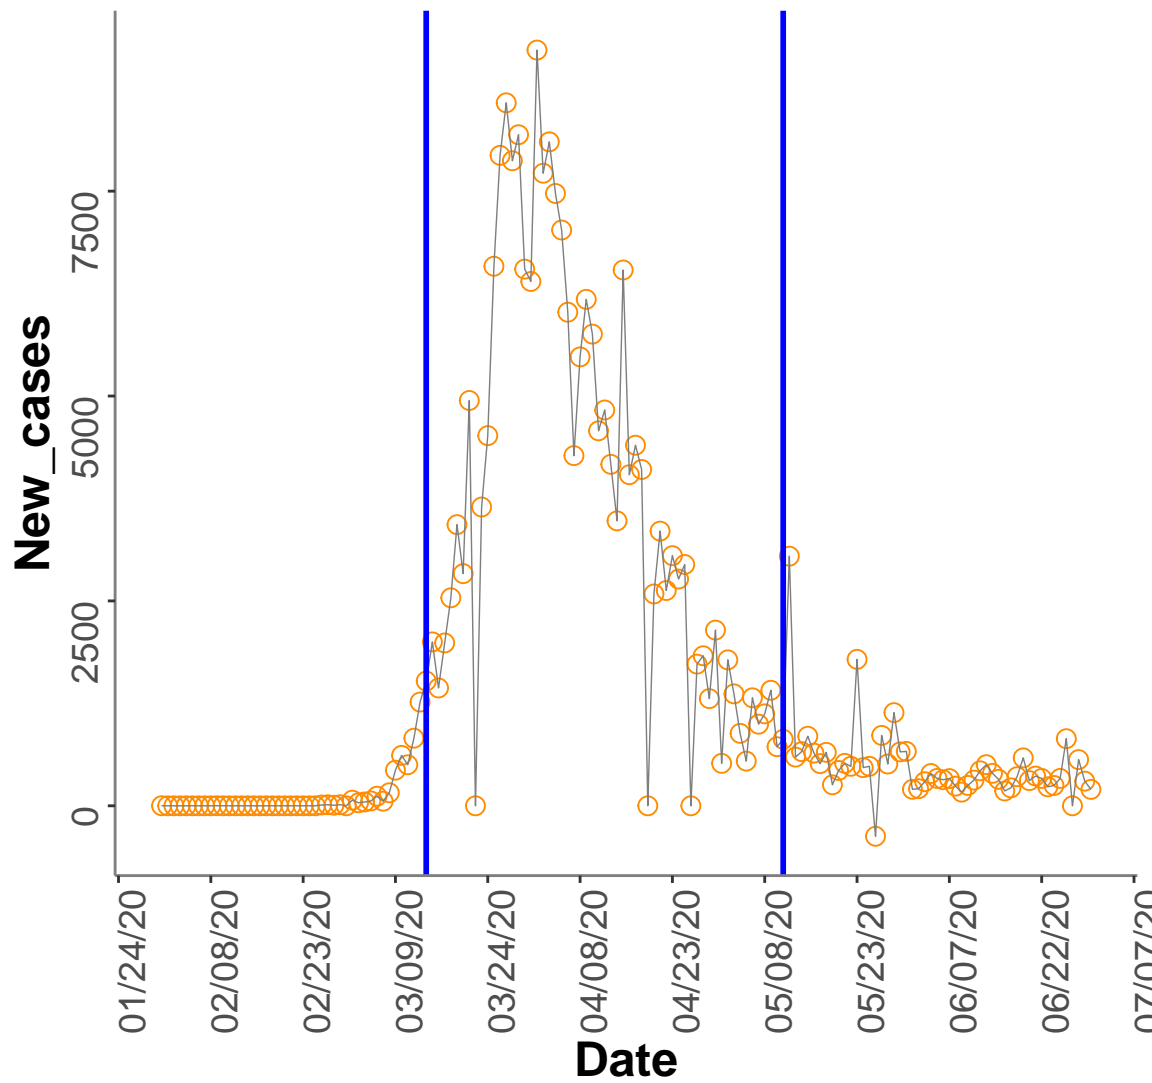

lockdown\_New\_cases\_Sri\_Lanka

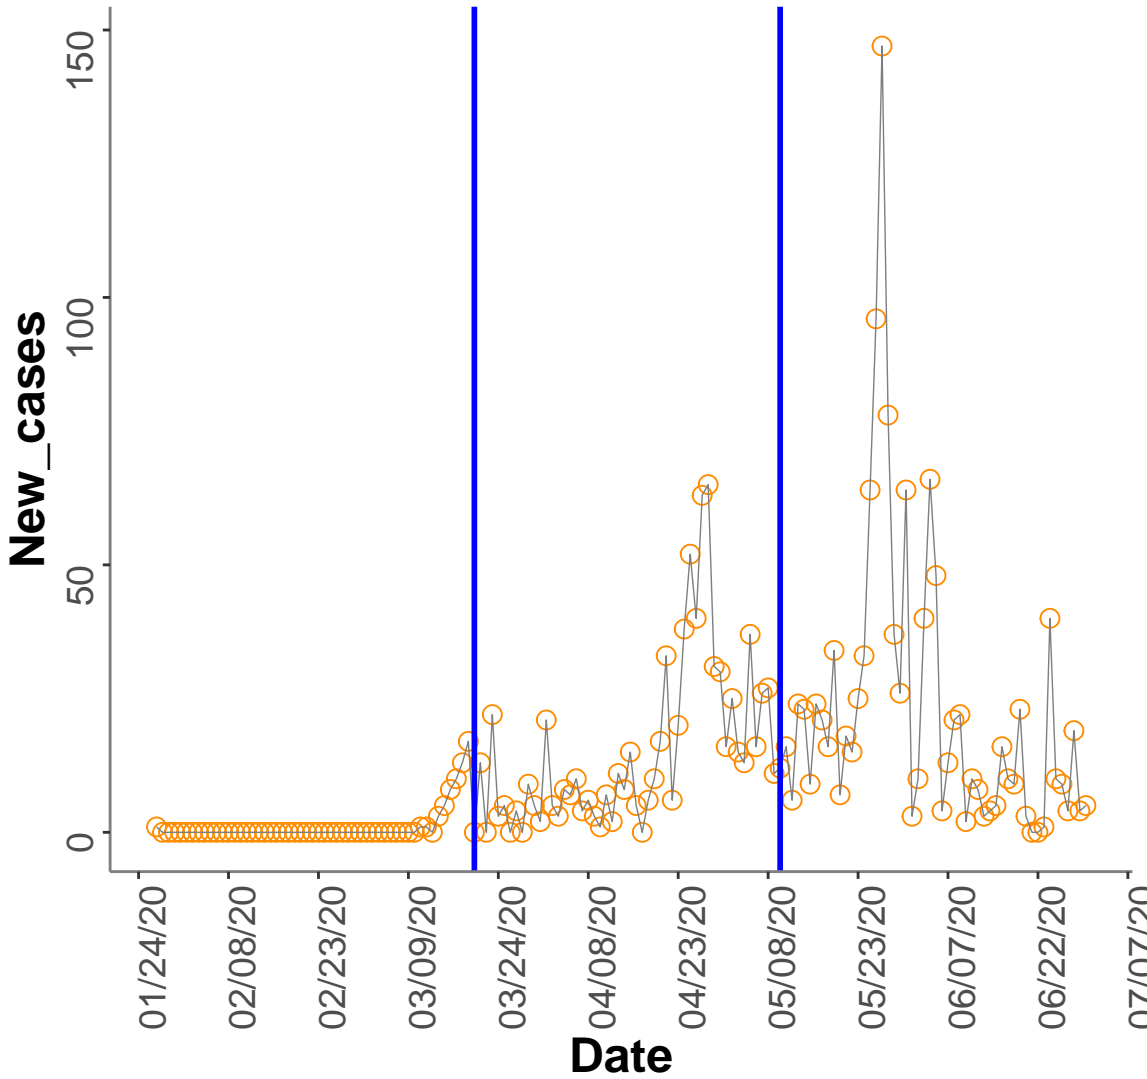

lockdown\_New\_cases\_Sudan

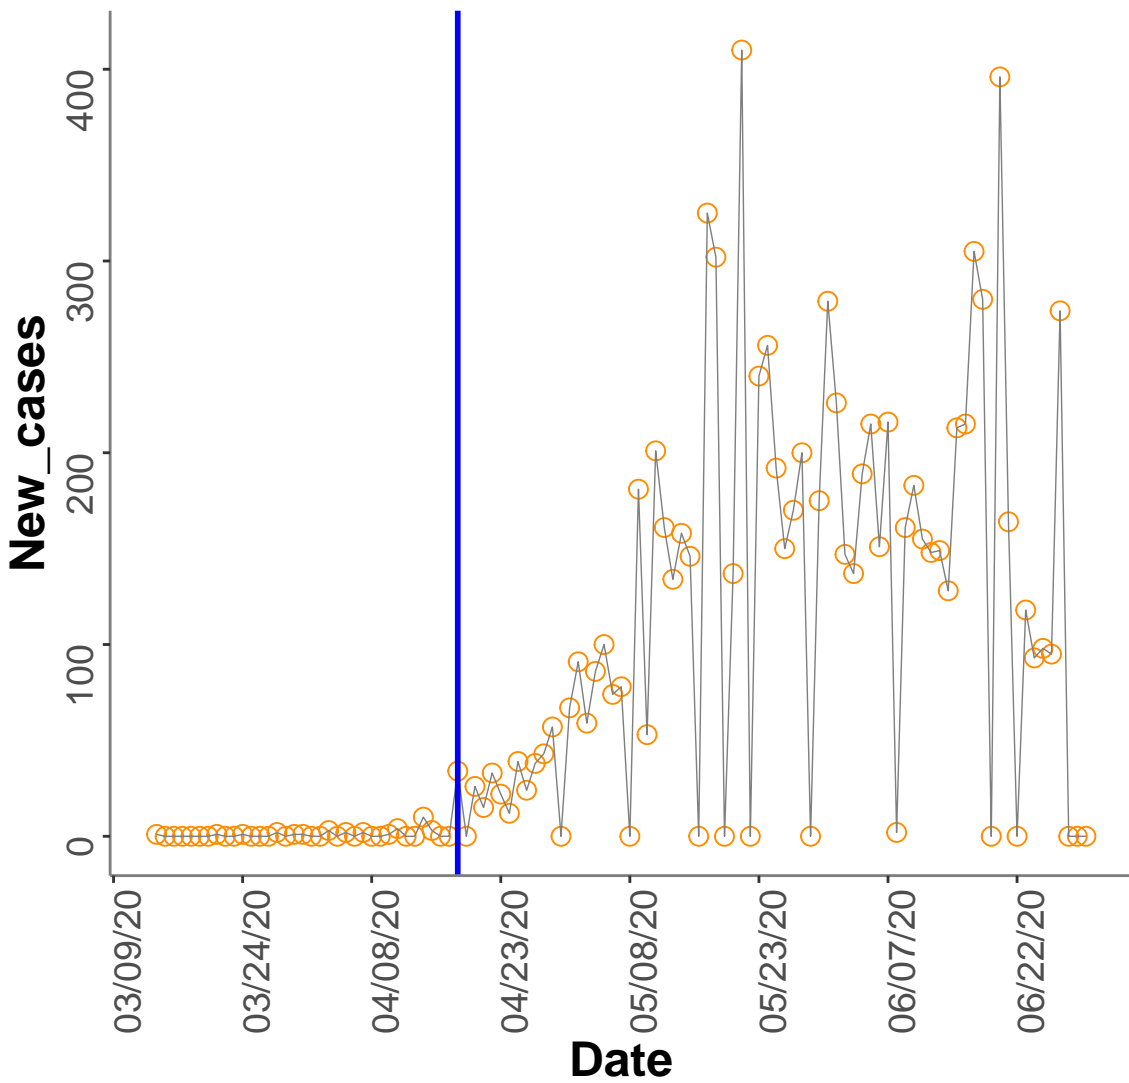

lockdown\_New\_cases\_Switzerland

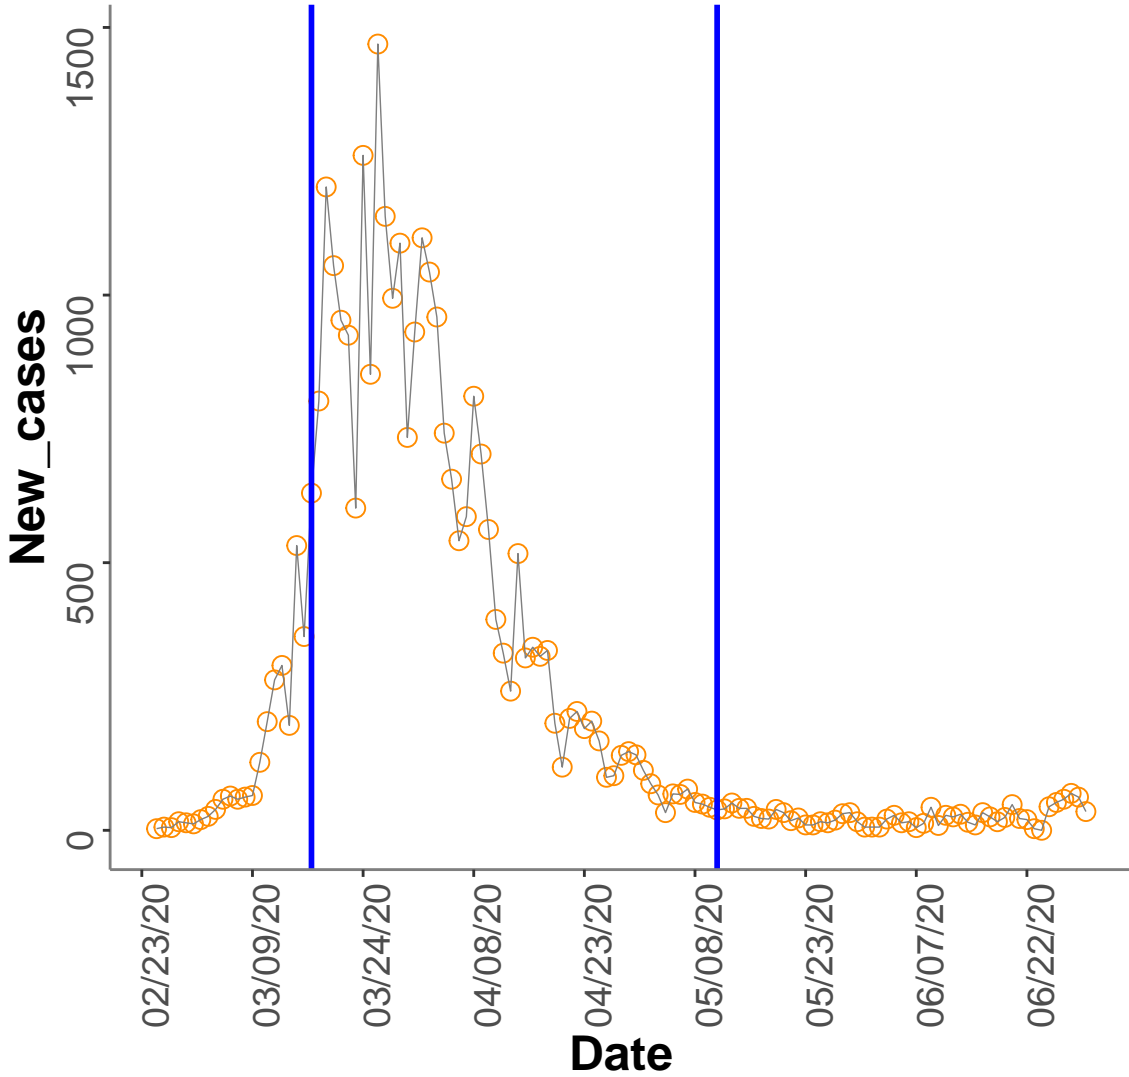

lockdown\_New\_cases\_Thailand

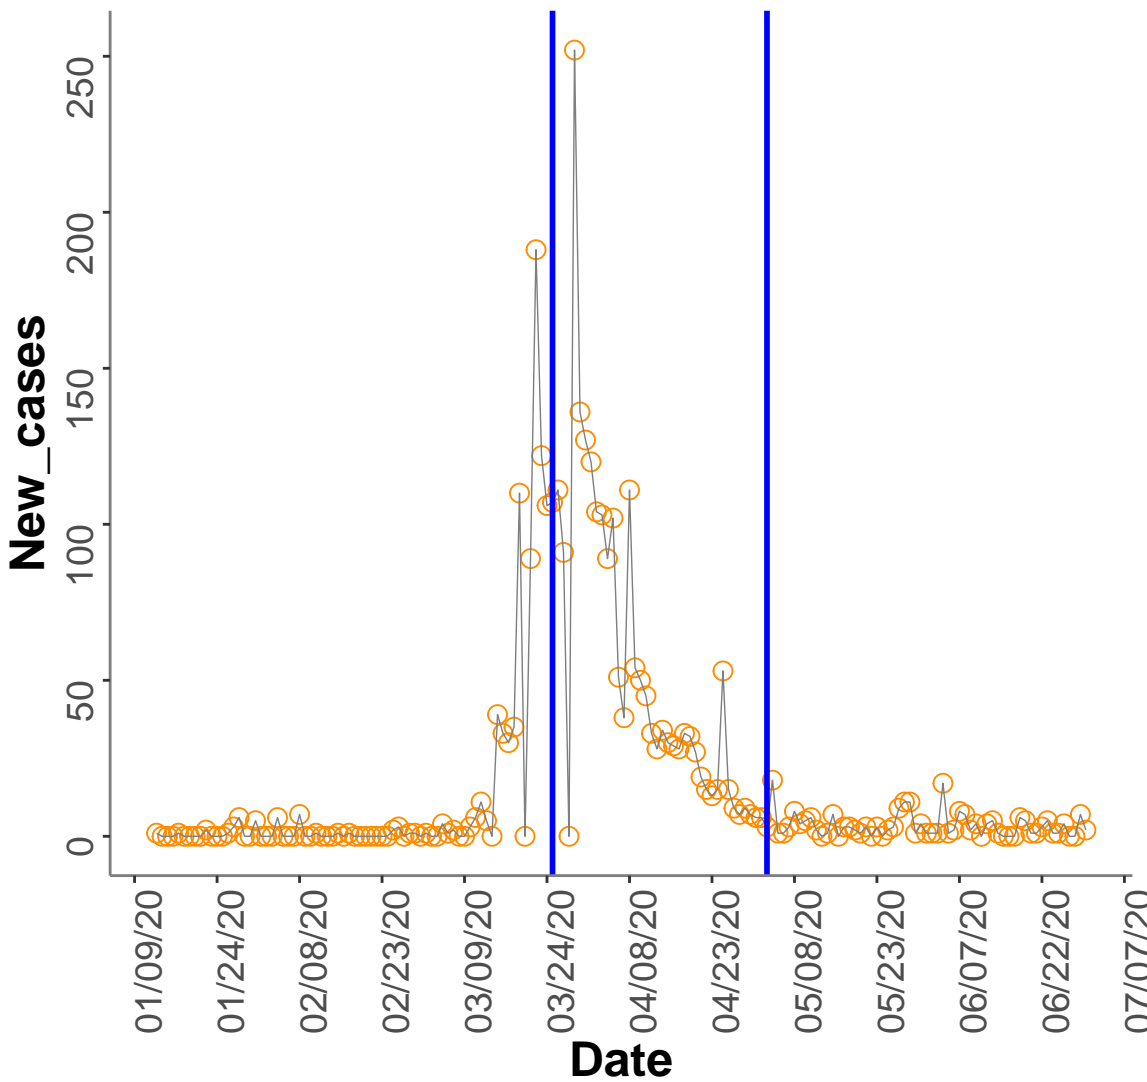

# lockdown\_New\_cases\_Trinidad\_and\_Tobago

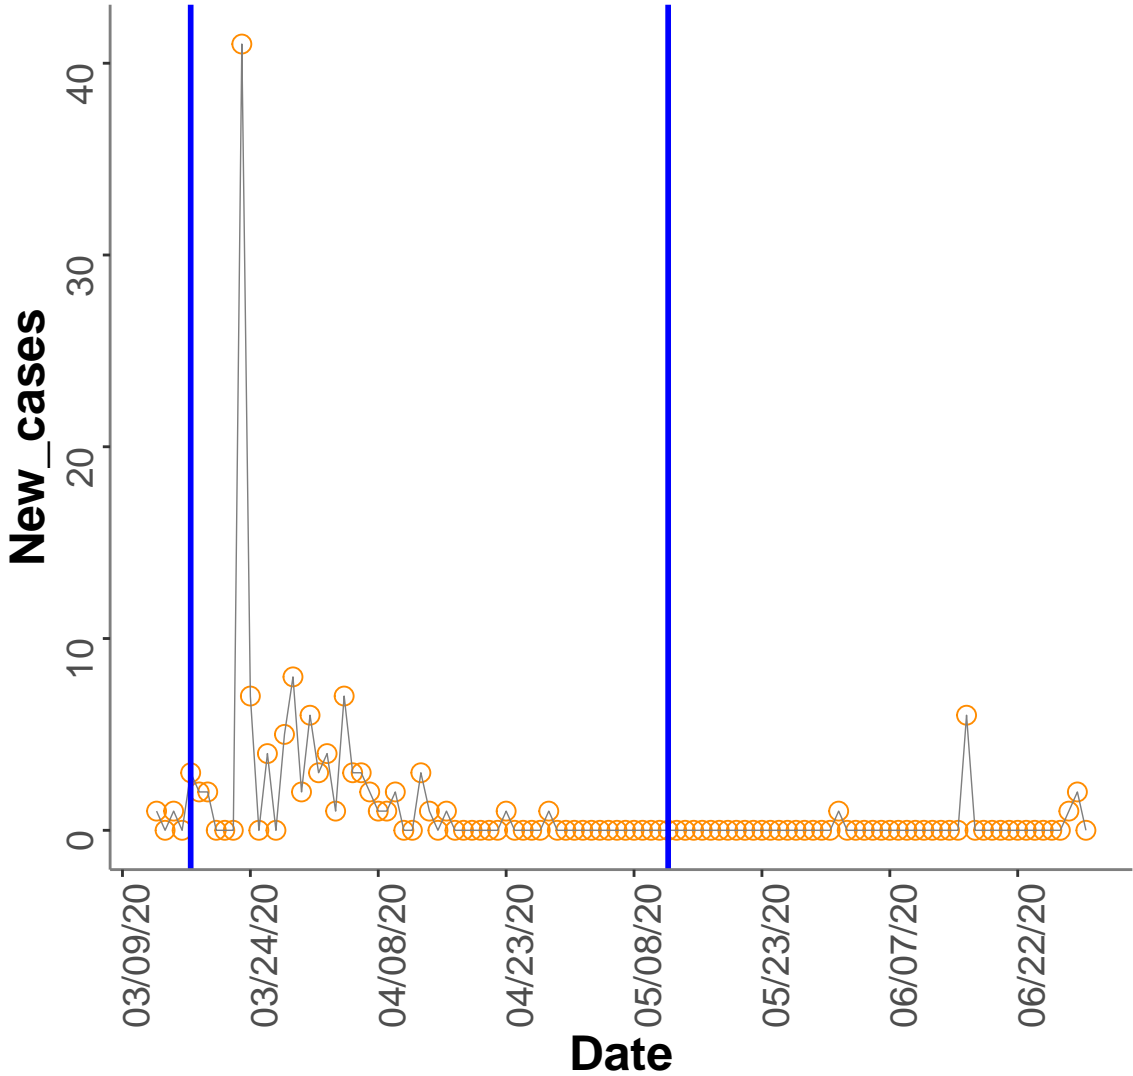

lockdown\_New\_cases\_Tunisia

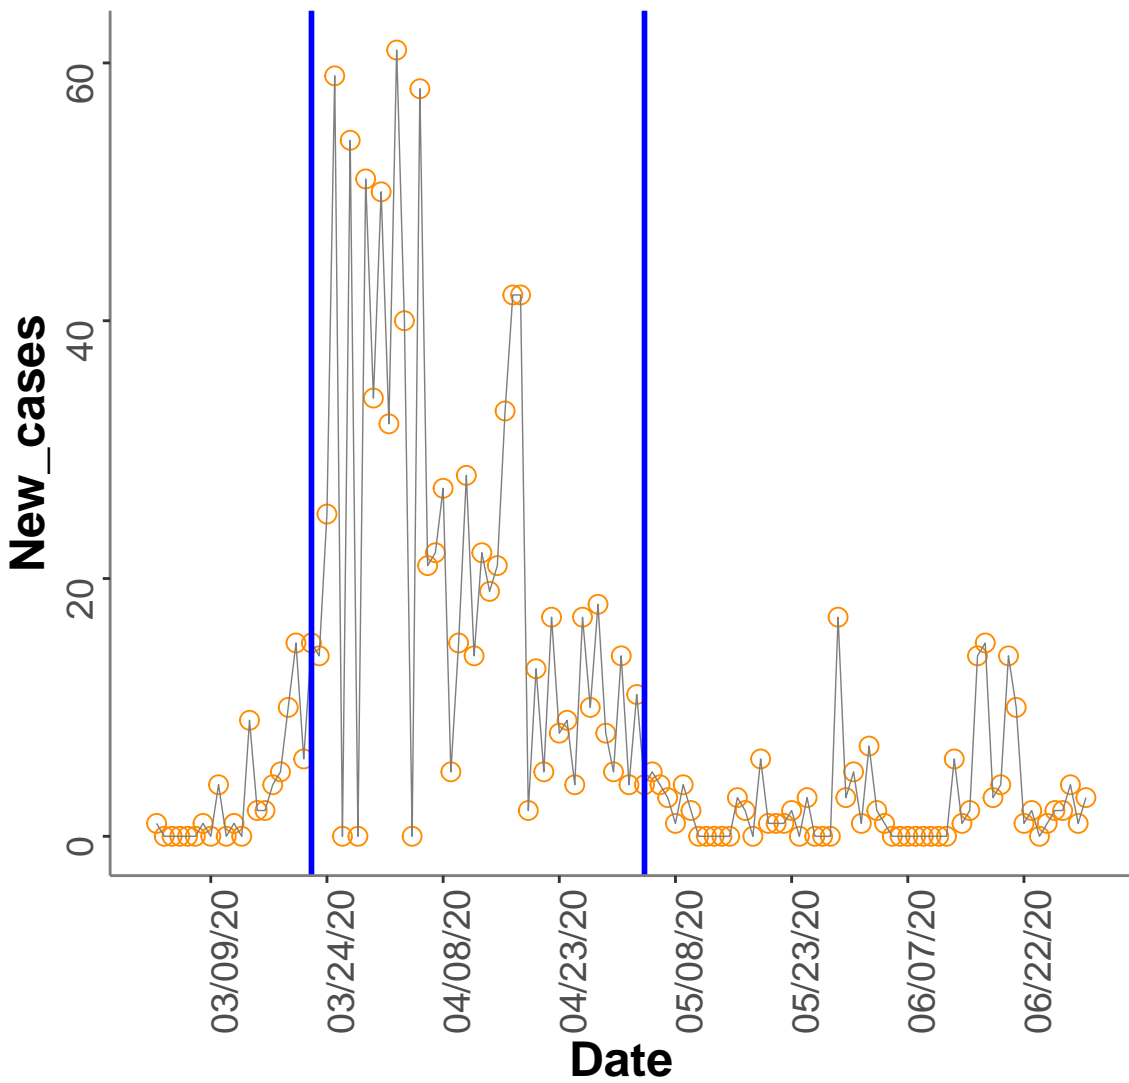



lockdown\_New\_cases\_Turkey

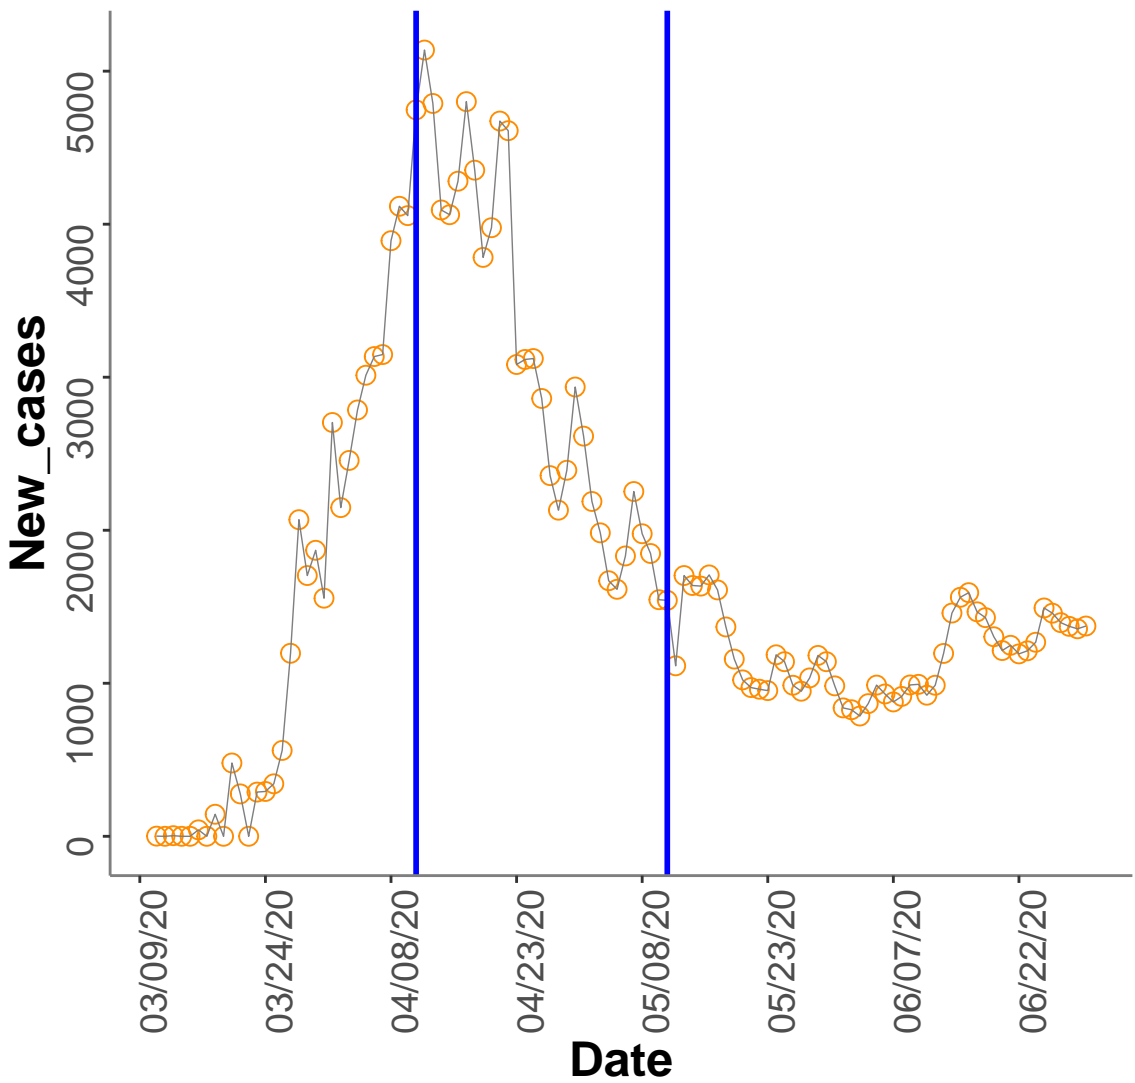

lockdown\_New\_cases\_Uganda

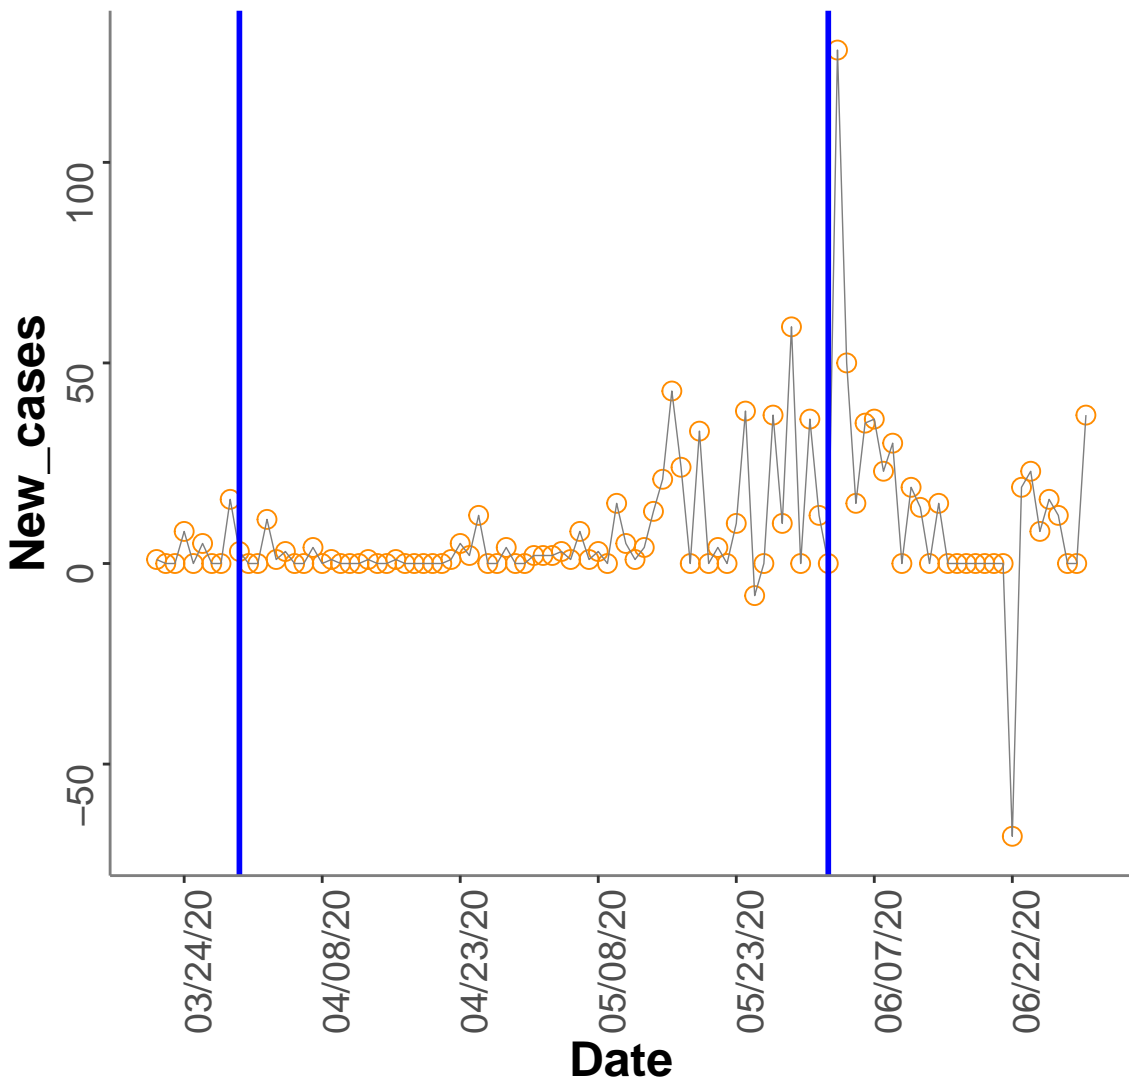

lockdown\_New\_cases\_Ukraine

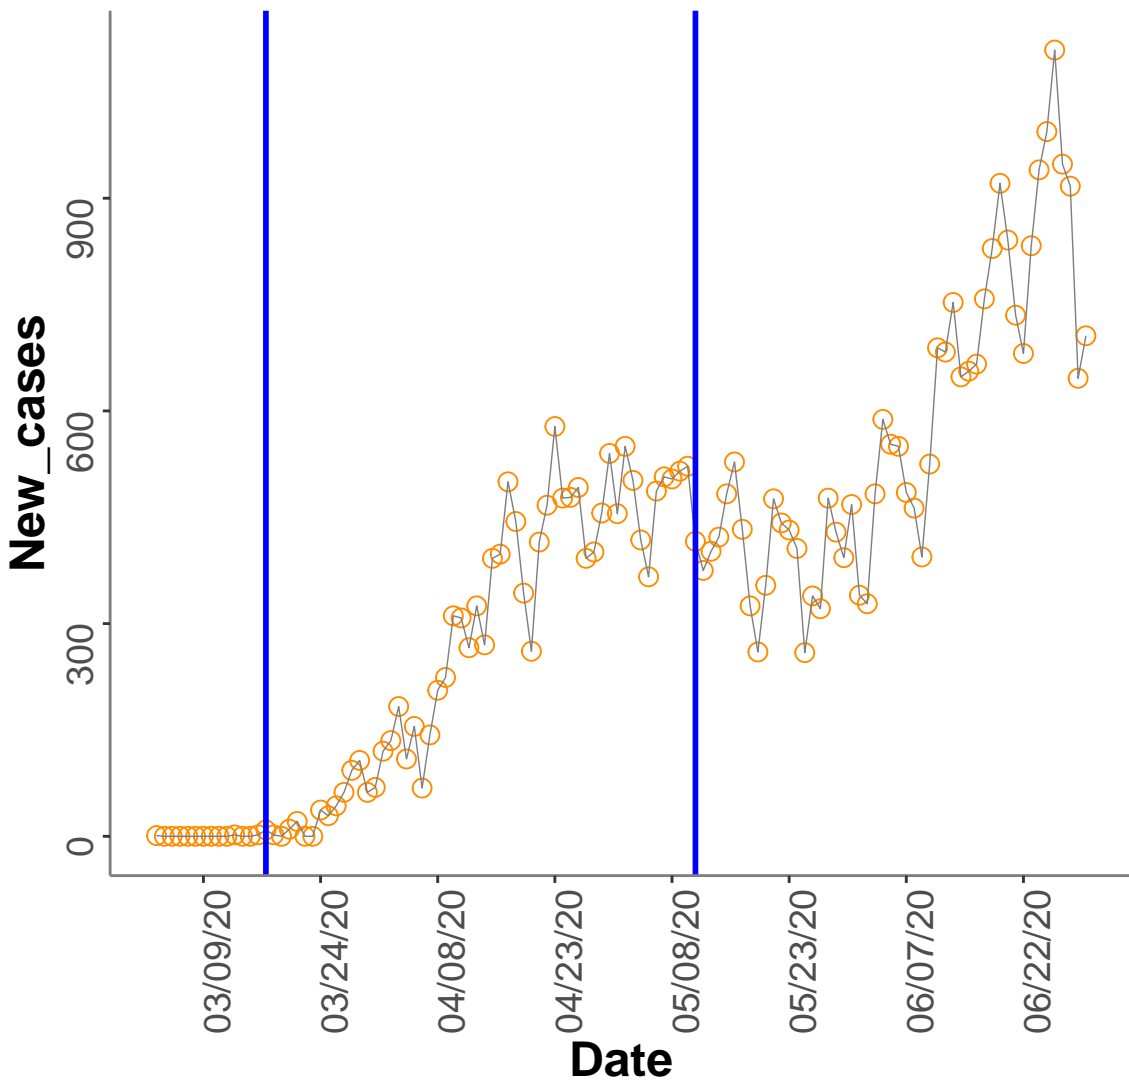

lockdown\_New\_cases\_United\_Arab\_Emirates

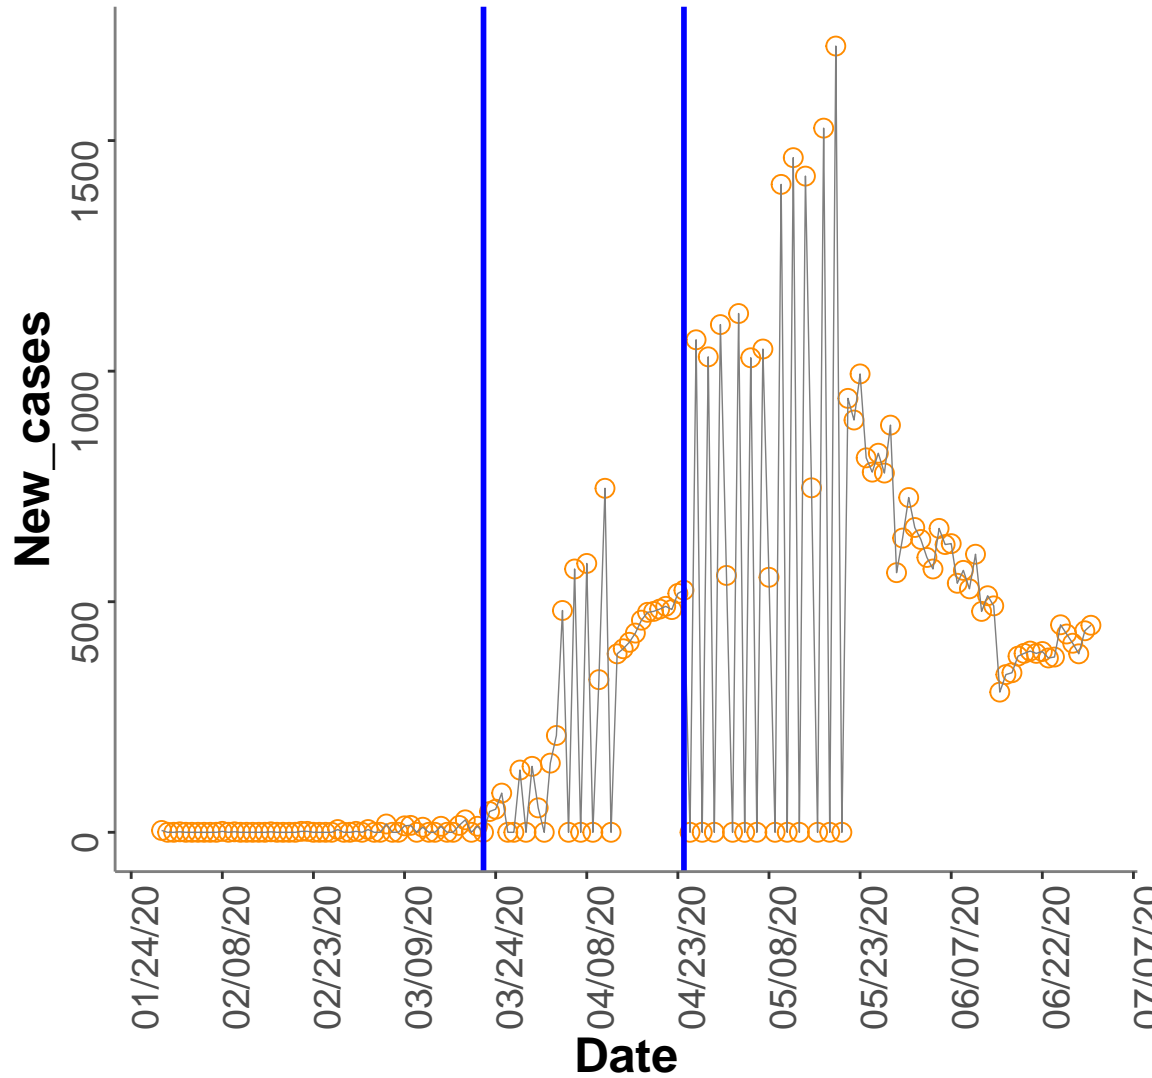

lockdown\_New\_cases\_United\_Kingdom

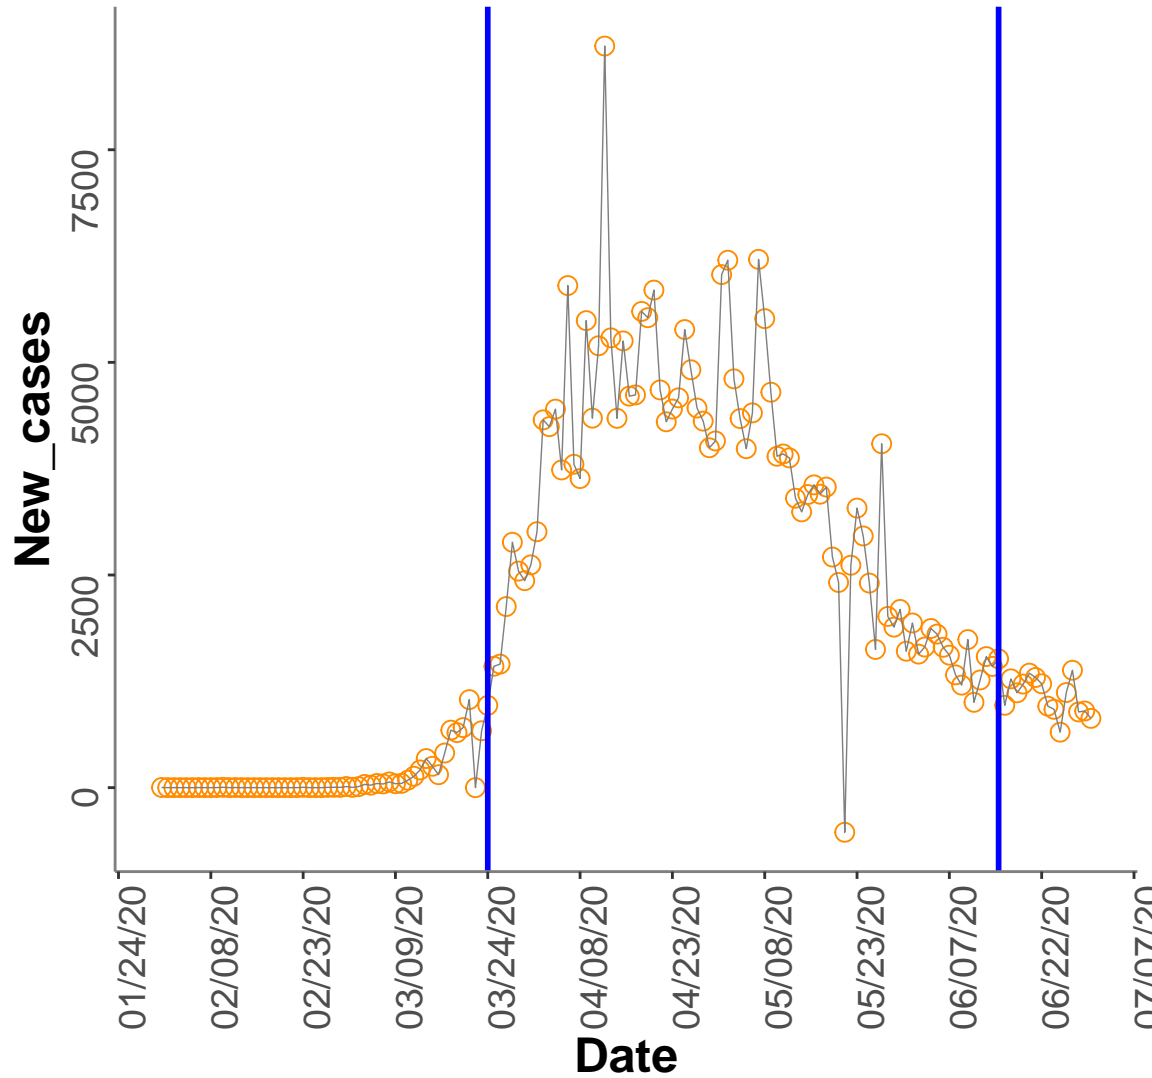

lockdown\_New\_cases\_United\_States

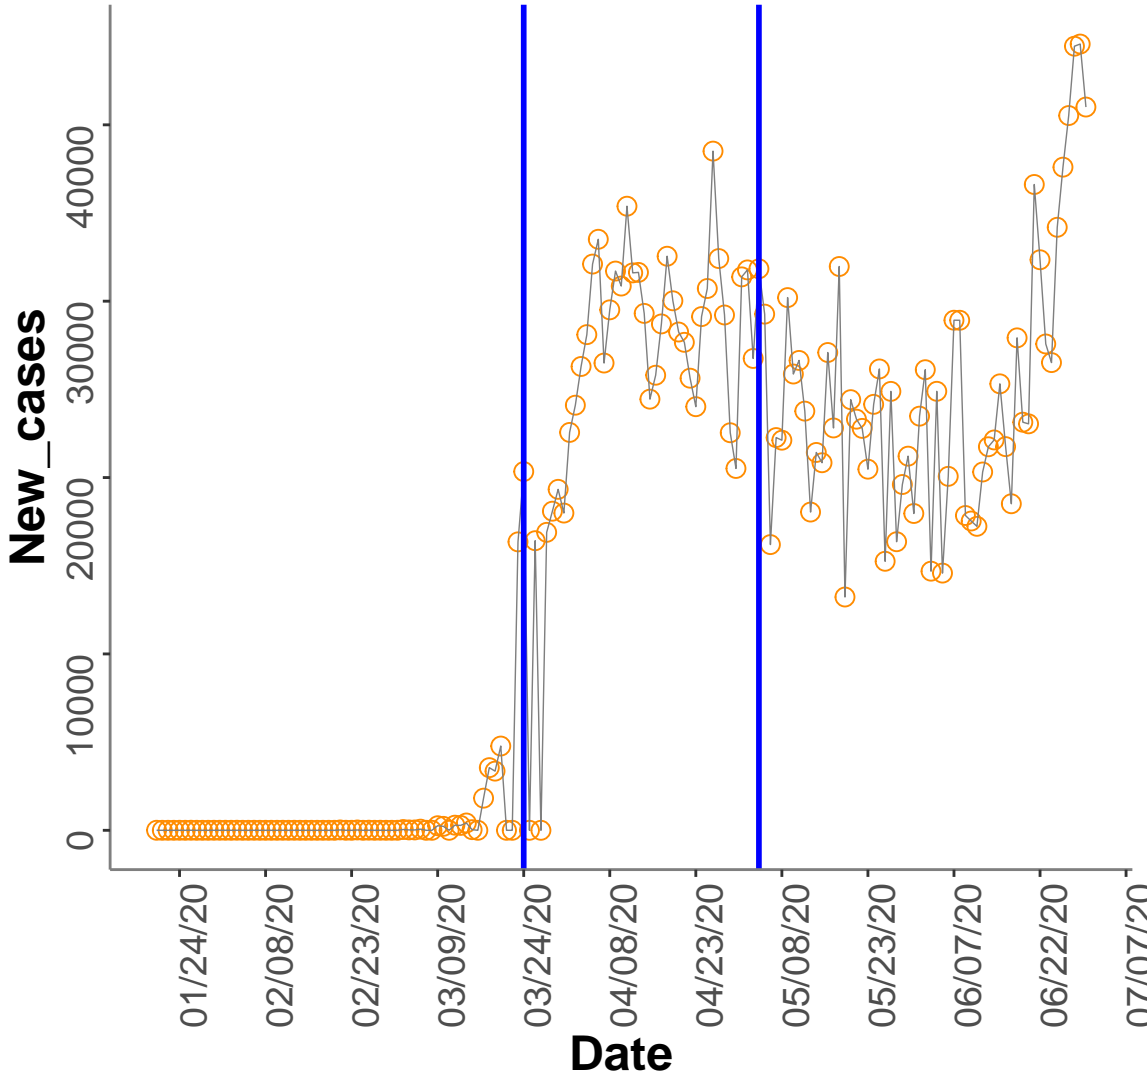

lockdown\_New\_cases\_Uzbekistan

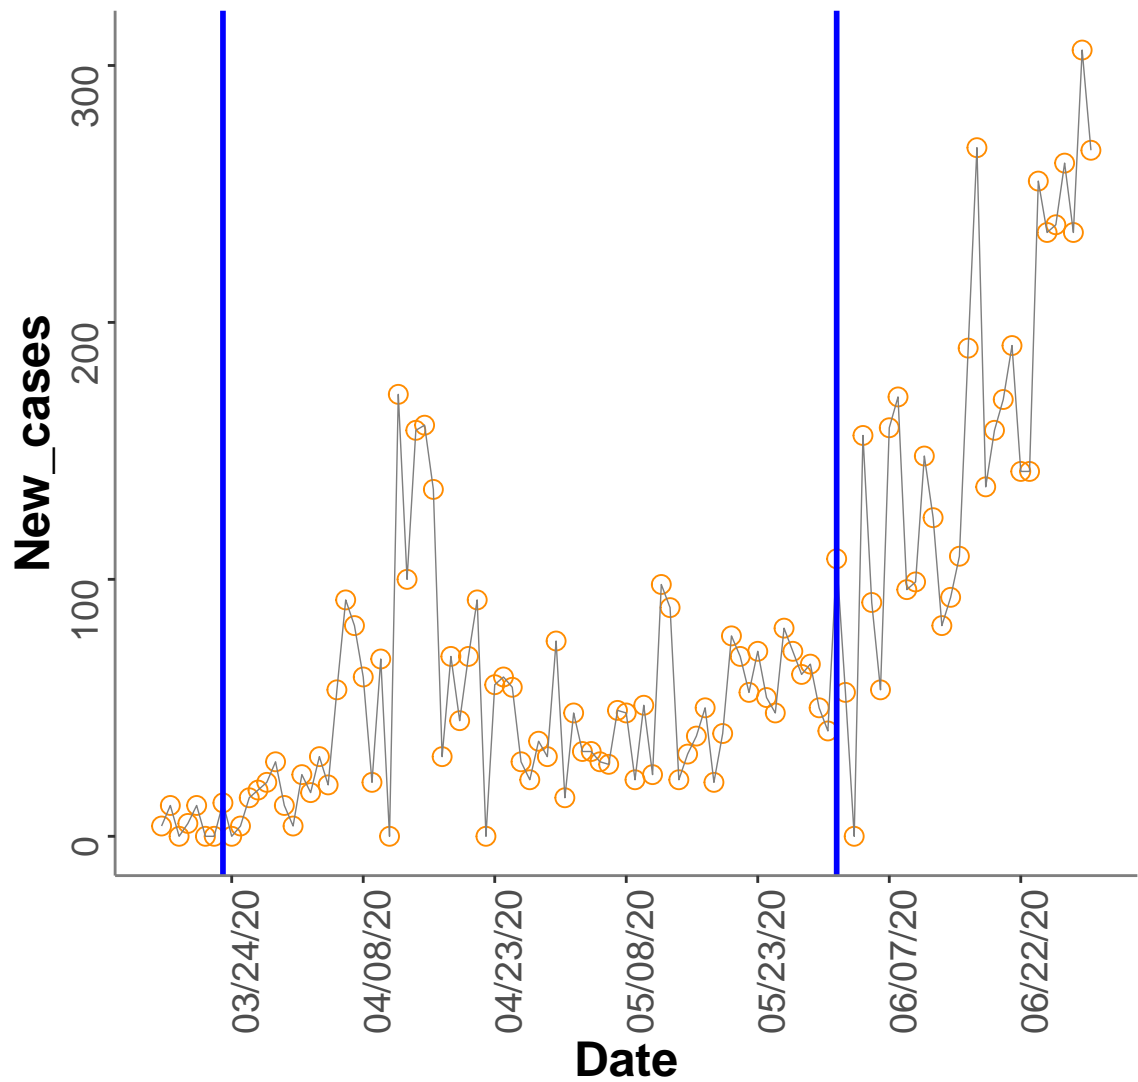

lockdown\_New\_cases\_Venezuela

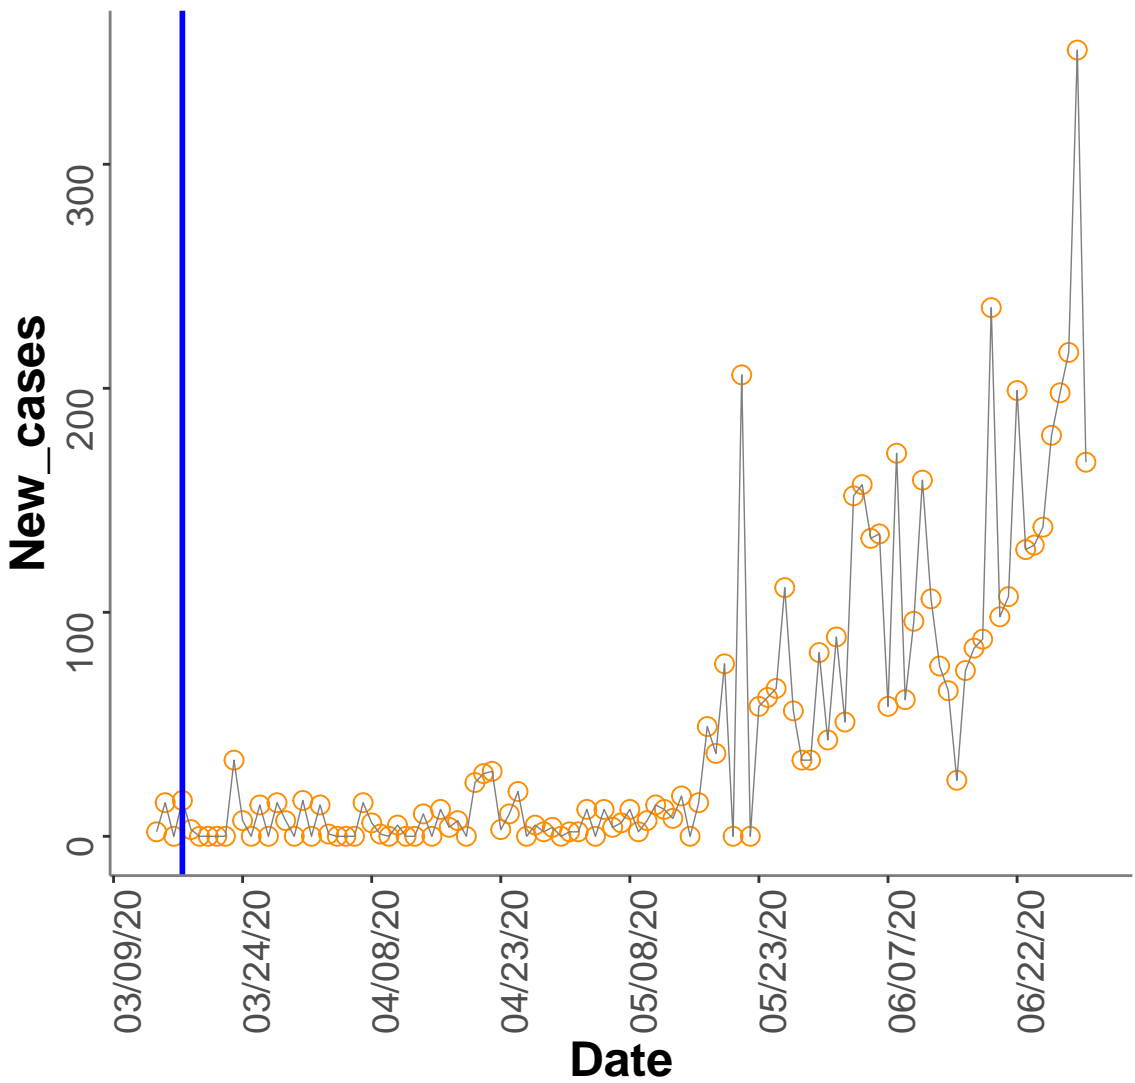



lockdown\_New\_cases\_Vietnam

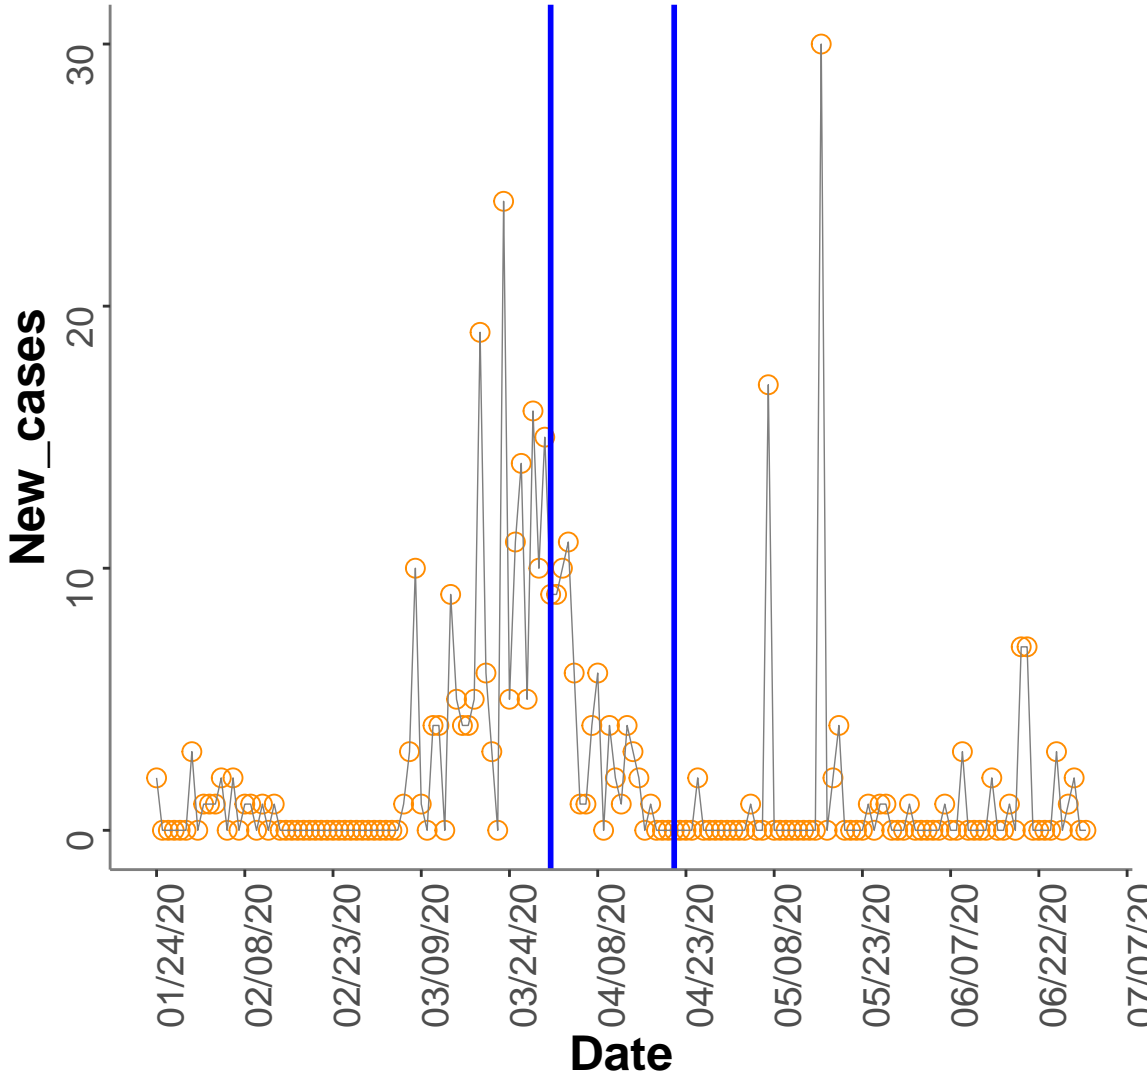

lockdown\_New\_cases\_Zimbabwe

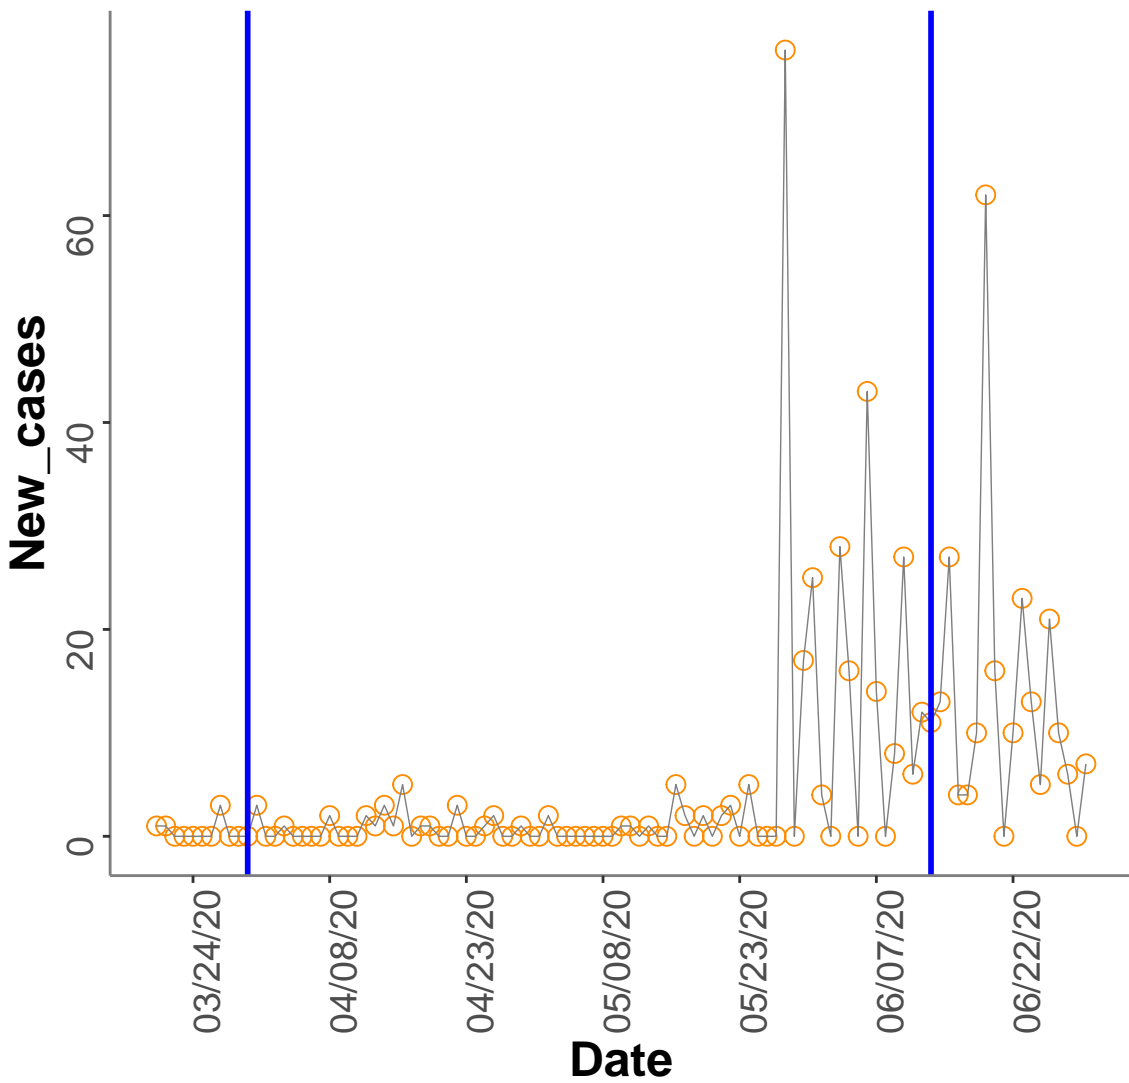

Supplement: MOESM7 [file 23604894]
