# Supplementary material for: Global-scale modeling of early factors and country-specific trajectories of COVID-19 incidence: a cross-sectional study of the first 6 months of the pandemic
Source: Springer Nature journal article supplement (doi:10.1186/s12889-022-14336-w), 2022-10-14
Supplement: MOESM2 [file 23604894]

**Additional File 2:** Table of Hamming distances to estimate the effect of different thresholds on country status around lockdown periods. A 5-point criteria was used to annotate countries based on the COVID-19 caseloads surrounding lockdown periods in each country: (a) percent change in the number of daily cases at the beginning and end of lockdown, (b) the presence of a peak in the number of daily cases within the lockdown period, (c) percent change in the number of daily cases 5 days after lifting of lockdown (early post-lockdown effects), (d) percent change in the number of daily cases 14 days after lifting of lockdown (later post-lockdown effects), and (e) percent change between day 5 and day 14 post-lockdown. The original thresholds applied were as follows: For (a), a >20% change was indicated as 1, a <-20% change was indicated as -1 and a change between -20% to 20% was indicated as 0. For (b), the presence of a peak was ascertained by visual inspection and indicated as 1 or 0 depending on the presence or absence of a peak. For (c, d, e), changes >10% were indicated by 1, changes <-10% were indicated by -1 and changes between -10% to 10% were indicated by 0. Alternate thresholds tested were  $\pm 10\%$  and  $\pm 30\%$  change for (a) and  $\pm 5$  and  $\pm 15\%$  changes for (c,d,e). The number of countries showing different assignments (0/1/-1) based on a comparison of the original thresholds to the altered thresholds are listed. Hamming distance was calculated based on 106 countries. The 5 lockdown criteria are symbolized as follows in the table: **a**, status\_lckendvs\_lckstart; **b**, interim peak; **c**, status\_postlckdn\_5d; **d**, status\_postlckdn\_14d; **e**, status\_pstlckdn\_14dvs5d

| <b>comp1</b> | <b>comp2</b> | <b>hamming_dist</b> |
|--------------|--------------|---------------------|
| a_10%        | a_20%        | 0                   |
| a_10%        | a_30%        | 6                   |
| a_20%        | a_30%        | 6                   |
| c_5%         | c_10%        | 0                   |
| c_5%         | c_15%        | 12                  |
| c_10%        | c_15%        | 12                  |
| d_5%         | d_10%        | 0                   |
| d_5%         | d_15%        | 5                   |
| d_10%        | d_15%        | 5                   |
| e_5%         | e_10%        | 5                   |
| e_5%         | e_15%        | 9                   |
| e_10%        | e_15%        | 4                   |
