# Supplementary material for: Global-scale modeling of early factors and country-specific trajectories of COVID-19 incidence: a cross-sectional study of the first 6 months of the pandemic
Source: Springer Nature journal article supplement (doi:10.1186/s12889-022-14336-w), 2022-10-14
Supplement: MOESM3 [file 23604894]

**Additional File 3: Akaike Information Criterion (AIC) scores for different modeling fits of COVID-19 incidence trajectories per country.**

Time-dependent increases in COVID-19 incidence in each country was modeled by 5 different fits (logistic, log-logistic, Gompertz, exponential and quadratic) and the AIC for each fit was obtained. The fit with the lowest AIC was considered the best descriptor of COVID-19 incidence trajectory for that country. E=exponential, G=Gompertz, L=logistic, LL=log logistic, Q=quadratic

| iso_code | location                     | aic_exponenti<br>al_aomisc | aic_quadrat<br>ic_aomisc | aic_gomper<br>tz | aic_logistic | aic_loglogi<br>stic | min_aic   | min_mod<br>el |
|----------|------------------------------|----------------------------|--------------------------|------------------|--------------|---------------------|-----------|---------------|
| ARG      | Argentina                    | -519.4359                  | -293.1                   | -399.3947        | -510.3414    | -429.7279           | -519.4359 | E             |
| ARM      | Armenia                      | -575.4335                  | -281.2955                | -429.9532        | -569.1829    | -481.008            | -575.4335 | E             |
| KEN      | Kenya                        | -492.1391                  | -264.4357                | -364.1499        | -483.4558    | -403.5553           | -492.1391 | E             |
| MOZ      | Mozambique                   | -347.0875                  | -234.0068                | -286.808         | -341.6595    | -297.3055           | -347.0875 | E             |
| OMN      | Oman                         | -608.6447                  | -266.261                 | -469.5128        | -598.7713    | -514.9805           | -608.6447 | E             |
| SYR      | Syria                        | -189.9028                  | -169.8439                | -177.1733        | -185.3791    | -173.7686           | -189.9028 | E             |
| ABW      | Aruba                        | -37.1124                   | -179.6666                | -383.5624        | -375.8171    | -370.1277           | -383.5624 | G             |
| AUS      | Australia                    | 288.8622                   | -98.56375                | -721.5018        | -630.9336    | -679.4295           | -721.5018 | G             |
| BHS      | Bahamas                      | -65.48152                  | -286.1183                | -460.9797        | -436.6443    | -454.0847           | -460.9797 | G             |
| BLR      | Belarus                      | 124.3315                   | -417.2244                | -719.0496        | -532.2615    | -639.1237           | -719.0496 | G             |
| BEL      | Belgium                      | 236.721                    | -192.2218                | -928.5873        | -653.8464    | -813.9948           | -928.5873 | G             |
| KHM      | Cambodia                     | 293.3314                   | -92.24171                | -560.7456        | -539.0694    | -553.1181           | -560.7456 | G             |
| CAN      | Canada                       | -240.6206                  | -403.0425                | -1043.556        | -728.9181    | -874.5596           | -1043.556 | G             |
| COM      | Comoros                      | -65.00342                  | -88.53149                | -109.4742        | -103.4227    | -107.8058           | -109.4742 | G             |
| HRV      | Croatia                      | 236.2205                   | -177.6417                | -694.42          | -503.2007    | -659.0569           | -694.42   | G             |
| FIN      | Finland                      | 222.1002                   | -275.2527                | -926.8893        | -716.9593    | -885.2132           | -926.8893 | G             |
| FRA      | France                       | -91.54441                  | -188.9969                | -810.3587        | -629.3746    | -735.6116           | -810.3587 | G             |
| DEU      | Germany                      | -71.38762                  | -169.7339                | -834.1931        | -607.9412    | -724.5686           | -834.1931 | G             |
| GIN      | Guinea                       | 131.4185                   | -336.2047                | -560.8072        | -471.5141    | -554.1017           | -560.8072 | G             |
| GNB      | Guinea-Bissau                | -89.86203                  | -146.9462                | -359.1439        | -303.4059    | -334.8317           | -359.1439 | G             |
| ISR      | Israel                       | 224.026                    | -164.021                 | -598.7116        | -502.0449    | -586.4122           | -598.7116 | G             |
| ITA      | Italy                        | 260.8388                   | -210.9075                | -934.4075        | -631.0801    | -808.6129           | -934.4075 | G             |
| MYS      | Malaysia                     | 230.397                    | -275.1989                | -607.1743        | -504.8873    | -576.6348           | -607.1743 | G             |
| MDV      | Maldives                     | -203.4072                  | -322.667                 | -441.595         | -390.2536    | -419.5333           | -441.595  | G             |
| MRT      | Mauritania                   | -368.8885                  | -156.8842                | -449.6888        | -447.4561    | -407.1135           | -449.6888 | G             |
| NZL      | New Zealand                  | 240.2938                   | -124.1334                | -623.8233        | -474.6146    | -590.2486           | -623.8233 | G             |
| NIC      | Nicaragua                    | -182.5548                  | -112.206                 | -284.0722        | -269.6554    | -273.2338           | -284.0722 | G             |
| NGA      | Nigeria                      | 93.12115                   | -373.688                 | -588.4661        | -506.709     | -564.1186           | -588.4661 | G             |
| PSE      | Palestine                    | -106.5762                  | -242.5927                | -337.1454        | -335.8945    | -336.1737           | -337.1454 | G             |
| ROU      | Romania                      | 179.5701                   | -286.4403                | -694.1917        | -514.8765    | -676.8608           | -694.1917 | G             |
| RUS      | Russia                       | 120.7514                   | -423.8718                | -1019.606        | -787.6958    | -896.9339           | -1019.606 | G             |
| SGP      | Singapore                    | -282.7371                  | -412.8369                | -835.0261        | -680.2723    | -742.8103           | -835.0261 | G             |
| SVN      | Slovenia                     | -36.25767                  | -330.946                 | -594.9116        | -515.0559    | -524.3848           | -594.9116 | G             |
| SOM      | Somalia                      | 115.8344                   | -336.8206                | -448.8508        | -382.0417    | -441.0927           | -448.8508 | G             |
| KOR      | South Korea                  | 317.3303                   | -217.9089                | -547.1069        | -468.4442    | -527.6811           | -547.1069 | G             |
| ESP      | Spain                        | -51.42859                  | -159.2056                | -788.6015        | -583.0118    | -702.1987           | -788.6015 | G             |
| SUR      | Suriname                     | -210.2892                  | -92.87623                | -426.363         | -401.3942    | -294.6721           | -426.363  | G             |
| SWZ      | Swaziland                    | -204.057                   | -304.9156                | -393.6947        | -357.9433    | -383.835            | -393.6947 | G             |
| SWE      | Sweden                       | 152.1216                   | -599.7472                | -701.6013        | -608.5926    | -684.5854           | -701.6013 | G             |
| THA      | Thailand                     | 288.6975                   | -121.0405                | -842.2996        | -688.2195    | -752.1801           | -842.2996 | G             |
| TTO      | Trinidad and Tobago          | -13.16185                  | -153.3113                | -377.3256        | -362.5323    | -375.8425           | -377.3256 | G             |
| UKR      | Ukraine                      | 134.5356                   | -352.3908                | -521.3244        | -448.8891    | -514.2782           | -521.3244 | G             |
| ARE      | United Arab Emirates         | -391.183                   | -518.4                   | -884.4118        | -764.0728    | -846.7397           | -884.4118 | G             |
| GBR      | United Kingdom               | -196.4518                  | -330.2519                | -994.419         | -690.1365    | -830.009            | -994.419  | G             |
| USA      | United States                | -276.3895                  | -457.1768                | -831.8523        | -647.3242    | -739.3606           | -831.8523 | G             |
| VNM      | Vietnam                      | -83.79162                  | -198.6398                | -453.4304        | -421.9267    | -449.511            | -453.4304 | G             |
| YEM      | Yemen                        | -192.2829                  | -278.6972                | -304.3151        | -276.8409    | -302.5162           | -304.3151 | G             |
| AFG      | Afghanistan                  | 75.20697                   | -267.3883                | -659.0859        | -769.6437    | -684.1644           | -769.6437 | L             |
| DZA      | Algeria                      | 147.8677                   | -465.995                 | -591.062         | -604.5712    | -598.3841           | -604.5712 | L             |
| AZE      | Azerbaijan                   | -433.3739                  | -325.4042                | -385.118         | -438.5728    | -381.3475           | -438.5728 | L             |
| BOL      | Bolivia                      | -441.4922                  | -270.6955                | -532.805         | -606.7738    | -553.4904           | -606.7738 | L             |
| BRA      | Brazil                       | -533.6372                  | -324.3367                | -783.4708        | -819.0281    | -799.8339           | -819.0281 | L             |
| BRN      | Brunei                       | -58.41021                  | -170.1948                | -475.4641        | -486.5877    | -431.1208           | -486.5877 | L             |
| BGR      | Bulgaria                     | -175.6322                  | -324.4719                | -451.9472        | -483.2497    | -450.2278           | -483.2497 | L             |
| CMR      | Cameroon                     | -422.8009                  | -341.5096                | -418.6513        | -463.6158    | -415.0359           | -463.6158 | L             |
| CHL      | Chile                        | 73.63594                   | -291.1997                | -541.8297        | -623.6542    | -562.9857           | -623.6542 | L             |
| COL      | Colombia                     | -531.4528                  | -339.0274                | -575.0414        | -717.6664    | -556.521            | -717.6664 | L             |
| COD      | Democratic Republic of Congo | -423.7926                  | -328.8589                | -514.3976        | -585.9027    | -527.1454           | -585.9027 | L             |
| DJI      | Djibouti                     | 96.86081                   | -222.5696                | -245.858         | -261.3541    | -240.2804           | -261.3541 | L             |
| EGY      | Egypt                        | -715.9543                  | -330.8873                | -620.4612        | -792.0326    | -676.7329           | -792.0326 | L             |
| SLV      | El Salvador                  | -284.1813                  | -393.5157                | -492.6497        | -538.6895    | -518.8214           | -538.6895 | L             |

|          |                          |            |           |           |           |           |           |    |
|----------|--------------------------|------------|-----------|-----------|-----------|-----------|-----------|----|
| GNQ      | Equatorial Guinea        | -184.848   | -268.3965 | -295.3989 | -308.0626 | -300.4626 | -308.0626 | L  |
| ETH      | Ethiopia                 | -444.8667  | -179.1884 | -394.9899 | -478.6834 | -457.0415 | -478.6834 | L  |
| FRO      | Faeroe Islands           | -134.314   | -202.9913 | -533.1052 | -536.7499 | -484.6154 | -536.7499 | L  |
| GAB      | Gabon                    | -249.4319  | -306.1942 | -463.4074 | -525.2767 | -510.8885 | -525.2767 | L  |
| GTM      | Guatemala                | -415.1563  | -256.3496 | -493.8615 | -527.1234 | -503.6336 | -527.1234 | L  |
| HND      | Honduras                 | -339.1489  | -349.3233 | -459.1551 | -504.7013 | -483.6571 | -504.7013 | L  |
| ISL      | Iceland                  | 5.018274   | -203.7473 | -521.6432 | -712.5129 | -569.628  | -712.5129 | L  |
| IRQ      | Iraq                     | -358.9644  | -240.274  | -303.2333 | -378.603  | -345.369  | -378.603  | L  |
| JPN      | Japan                    | 249.7093   | -211.0231 | -754.037  | -857.9649 | -851.9757 | -857.9649 | L  |
| KWT      | Kuwait                   | -330.3434  | -325.5369 | -574.0966 | -708.6893 | -665.4664 | -708.6893 | L  |
| LBY      | Libya                    | -182.2106  | -144.7013 | -208.2521 | -222.5981 | -213.555  | -222.5981 | L  |
| MDG      | Madagascar               | -321.841   | -211.1728 | -340.4128 | -367.9508 | -354.516  | -367.9508 | L  |
| MWI      | Malawi                   | -179.9557  | -118.7264 | -214.8729 | -227.7988 | -224.5619 | -227.7988 | L  |
| MUS      | Mauritius                | -13.44839  | -148.1111 | -349.7391 | -394.3464 | -334.7457 | -394.3464 | L  |
| MNG      | Mongolia                 | -160.9919  | -173.3632 | -207.5932 | -216.8627 | -213.2572 | -216.8627 | L  |
| MNE      | Montenegro               | -9.9015    | -194.5633 | -417.6422 | -439.3091 | -411.5469 | -439.3091 | L  |
| NPL      | Nepal                    | -772.5703  | -186.6951 | -736.8629 | -812.4892 | -694.3476 | -812.4892 | L  |
| PAK      | Pakistan                 | 72.11925   | -357.1864 | -569.8906 | -597.6492 | -589.1561 | -597.6492 | L  |
| PRY      | Paraguay                 | -203.8209  | -278.1733 | -306.3096 | -326.5595 | -321.2364 | -326.5595 | L  |
| PRI      | Puerto Rico              | -296.0552  | -320.6779 | -325.3588 | -344.4649 | -303.7455 | -344.4649 | L  |
| SMR      | San Marino               | -107.0072  | -322.8579 | -454.8554 | -485.0689 | -433.3266 | -485.0689 | L  |
| SLE      | Sierra Leone             | -161.5772  | -268.5225 | -390.1726 | -429.0014 | -394.2264 | -429.0014 | L  |
| SVK      | Slovakia                 | -40.40369  | -204.0995 | -353.5257 | -444.3017 | -382.7082 | -444.3017 | L  |
| ZAF      | South Africa             | -713.1142  | -277.9243 | -489.2998 | -714.8869 | -563.1096 | -714.8869 | L  |
| TJK      | Tajikistan               | -69.97804  | -133.1642 | -197.9593 | -212.6947 | -197.3153 | -212.6947 | L  |
| TZA      | Tanzania                 | -0.7878212 | -70.468   | -294.4116 | -306.5018 | -300.2692 | -306.5018 | L  |
| TGO      | Togo                     | -241.3733  | -267.9437 | -280.5283 | -312.2453 | -298.6332 | -312.2453 | L  |
| UGA      | Uganda                   | -260.0813  | -184.8116 | -221.1829 | -275.4897 | -267.0315 | -275.4897 | L  |
| VEN      | Venezuela                | -360.9993  | -213.7441 | -378.6897 | -404.4584 | -381.59   | -404.4584 | L  |
| ZWE      | Zimbabwe                 | -240.4124  | -138.4916 | -271.1943 | -282.4253 | -279.3634 | -282.4253 | L  |
| ALB      | Albania                  | -180.2771  | -414.5921 | -403.9503 | -340.6403 | -449.2842 | -449.2842 | LL |
| AND      | Andorra                  | -48.54891  | -205.7091 | -372.12   | -333.0738 | -378.6237 | -378.6237 | LL |
| AUT      | Austria                  | 245.5047   | -205.2538 | -517.5523 | -420.187  | -534.191  | -534.191  | LL |
| BHR      | Bahrain                  | -536.9529  | -420.3046 | -672.5993 | -660.6068 | -680.0634 | -680.0634 | LL |
| BGD      | Bangladesh               | -418.8996  | -325.7193 | -626.1149 | -579.3237 | -696.6032 | -696.6032 | LL |
| BMU      | Bermuda                  | -75.12337  | -274.5523 | -312.1753 | -308.354  | -313.7703 | -313.7703 | LL |
| BIH      | Bosnia and Herzegovina   | -121.5209  | -308.9959 | -485.7773 | -375.8362 | -509.2348 | -509.2348 | LL |
| BFA      | Burkina Faso             | -90.7018   | -339.3211 | -376.577  | -331.3556 | -426.0207 | -426.0207 | LL |
| CPV      | Cape Verde               | -205.46    | -322.098  | -351.4381 | -329.7493 | -352.0379 | -352.0379 | LL |
| CAF      | Central African Republic | -492.5666  | -213.6687 | -520.2174 | -537.1035 | -552.0606 | -552.0606 | LL |
| TCD      | Chad                     | -138.017   | -215.6217 | -425.884  | -429.5412 | -449.8989 | -449.8989 | LL |
| CHN      | China                    | 409.8893   | -211.8449 | -801.3443 | -842.9381 | -854.0821 | -854.0821 | LL |
| COG      | Congo                    | -251.8946  | -398.8223 | -390.7207 | -372.2798 | -399.5034 | -399.5034 | LL |
| CUB      | Cuba                     | -84.31355  | -228.5059 | -472.0589 | -387.2562 | -487.1679 | -487.1679 | LL |
| CYP      | Cyprus                   | -43.82064  | -260.1209 | -489.6963 | -410.2633 | -527.0066 | -527.0066 | LL |
| CZE      | Czech Republic           | 211.1751   | -281.4305 | -438.3096 | -361.793  | -472.3774 | -472.3774 | LL |
| DNK      | Denmark                  | 212.0067   | -276.6672 | -602.8864 | -515.6257 | -610.8224 | -610.8224 | LL |
| DOM      | Dominican Republic       | 129.3501   | -542.6278 | -593.0407 | -494.751  | -646.8393 | -646.8393 | LL |
| ECU      | Ecuador                  | 161.8695   | -203.0704 | -311.348  | -306.7964 | -314.4104 | -314.4104 | LL |
| EST      | Estonia                  | 220.672    | -246.7971 | -504.6721 | -424.5989 | -527.6343 | -527.6343 | LL |
| GEO      | Georgia                  | -134.246   | -262.075  | -547.201  | -499.7239 | -571.5538 | -571.5538 | LL |
| GHA      | Ghana                    | 110.745    | -335.9963 | -396.8478 | -381.6732 | -398.8628 | -398.8628 | LL |
| GIB      | Gibraltar                | -79.91624  | -180.4305 | -256.819  | -255.7615 | -281.8402 | -281.8402 | LL |
| GRC      | Greece                   | -65.8449   | -284.4489 | -548.4726 | -459.9016 | -584.0823 | -584.0823 | LL |
| GUM      | Guam                     | -83.86717  | -207.4634 | -266.7225 | -269.0415 | -297.0752 | -297.0752 | LL |
| GGY      | Guernsey                 | -5.304221  | -172.6126 | -415.9911 | -425.0924 | -432.2642 | -432.2642 | LL |
| GUY      | Guyana                   | -161.4976  | -334.9942 | -372.5732 | -366.4181 | -379.8538 | -379.8538 | LL |
| HTI      | Haiti                    | -366.388   | -174.0277 | -489.0297 | -507.2827 | -512.5395 | -512.5395 | LL |
| HUN      | Hungary                  | 191.8024   | -239.8258 | -621.2835 | -475.6198 | -638.5135 | -638.5135 | LL |
| IND      | India                    | 60.53107   | -345.8236 | -1076.049 | -1025.569 | -1217.242 | -1217.242 | LL |
| IDN      | Indonesia                | 116.4559   | -629.9846 | -566.1467 | -483.9269 | -630.076  | -630.076  | LL |
| IRN      | Iran                     | 172.1402   | -449.9572 | -418.7691 | -408.6297 | -465.8453 | -465.8453 | LL |
| IRL      | Ireland                  | 209.4387   | -165.0268 | -559.2162 | -586.6975 | -625.698  | -625.698  | LL |
| IMN      | Isle of Man              | -13.90298  | -209.3267 | -398.8593 | -400.2791 | -408.1989 | -408.1989 | LL |
| JAM      | Jamaica                  | -71.39612  | -152.2579 | -394.2924 | -382.9004 | -404.4485 | -404.4485 | LL |
| JEY      | Jersey                   | -37.8474   | -264.8204 | -399.0455 | -378.7026 | -408.5039 | -408.5039 | LL |
| KAZ      | Kazakhstan               | -306.3074  | -471.5966 | -479.7348 | -446.8391 | -486.9395 | -486.9395 | LL |
| OWID_KOS | Kosovo                   | -107.5783  | -243.9919 | -339.6378 | -306.9429 | -349.6144 | -349.6144 | LL |
| LVA      | Latvia                   | -87.24654  | -346.6816 | -439.3656 | -406.3895 | -453.592  | -453.592  | LL |
| LBR      | Liberia                  | -195.854   | -331.8112 | -345.9563 | -291.569  | -363.7065 | -363.7065 | LL |
| LTU      | Lithuania                | 209.201    | -197.1854 | -381.921  | -317.9006 | -393.7108 | -393.7108 | LL |

|     |                       |           |           |           |           |           |           |    |
|-----|-----------------------|-----------|-----------|-----------|-----------|-----------|-----------|----|
| LUX | Luxembourg            | 232.1051  | -212.3696 | -510.8381 | -374.8697 | -536.564  | -536.564  | LL |
| MKD | Macedonia             | 124.5843  | -300.5874 | -287.241  | -265.1456 | -303.7303 | -303.7303 | LL |
| MLI | Mali                  | -219.4592 | -400.0941 | -362.9061 | -308.5409 | -406.9345 | -406.9345 | LL |
| MLT | Malta                 | -101.5559 | -319.1074 | -338.9974 | -291.6384 | -362.5572 | -362.5572 | LL |
| MEX | Mexico                | 87.73245  | -377.0196 | -840.3216 | -672.1857 | -852.9599 | -852.9599 | LL |
| MDA | Moldova               | 129.9677  | -482.7673 | -463.9427 | -405.7322 | -516.3397 | -516.3397 | LL |
| MAR | Morocco               | 166.2563  | -252.4766 | -580.4489 | -550.9611 | -591.5384 | -591.5384 | LL |
| MMR | Myanmar               | -91.58642 | -227.3966 | -256.931  | -244.4117 | -268.6348 | -268.6348 | LL |
| NLD | Netherlands           | 216.2215  | -230.5749 | -696.7019 | -553.8551 | -721.2155 | -721.2155 | LL |
| NER | Niger                 | -46.6877  | -220.3004 | -253.8218 | -238.7944 | -267.3848 | -267.3848 | LL |
| NOR | Norway                | 239.7677  | -285.6923 | -599.3417 | -496.5518 | -652.9174 | -652.9174 | LL |
| PER | Peru                  | 100.6404  | -475.6739 | -626.6595 | -566.5708 | -629.8398 | -629.8398 | LL |
| POL | Poland                | 149.0126  | -434.1856 | -514.8712 | -476.8072 | -557.1157 | -557.1157 | LL |
| PRT | Portugal              | 191.5806  | -279.8206 | -454.4319 | -391.1689 | -477.3903 | -477.3903 | LL |
| QAT | Qatar                 | 100.4169  | -433.8739 | -732.6619 | -702.281  | -766.49   | -766.49   | LL |
| STP | Sao Tome and Principe | -89.14566 | -129.8387 | -140.3291 | -137.3855 | -140.3943 | -140.3943 | LL |
| SAU | Saudi Arabia          | 106.6419  | -484.318  | -650.6945 | -610.679  | -656.5145 | -656.5145 | LL |
| SEN | Senegal               | -275.2635 | -397.5647 | -496.4703 | -514.174  | -531.8181 | -531.8181 | LL |
| SRB | Serbia                | 189.3387  | -191.3527 | -558.3205 | -464.2723 | -573.9561 | -573.9561 | LL |
| SSD | South Sudan           | -209.9274 | -204.6344 | -250.9443 | -251.4258 | -252.0148 | -252.0148 | LL |
| LKA | Sri Lanka             | 128.8065  | -449.3042 | -528.0057 | -511.0591 | -528.0899 | -528.0899 | LL |
| SDN | Sudan                 | 91.9268   | -321.7591 | -560.5731 | -551.1181 | -580.8621 | -580.8621 | LL |
| CHE | Switzerland           | 248.5261  | -211.5366 | -822.3088 | -569.1514 | -863.091  | -863.091  | LL |
| TWN | Taiwan                | -29.62892 | -137.7052 | -648.1754 | -627.018  | -652.3505 | -652.3505 | LL |
| TUN | Tunisia               | -31.88137 | -225.999  | -554.8591 | -460.5878 | -555.6231 | -555.6231 | LL |
| TUR | Turkey                | 180.8283  | -232.4939 | -508.1436 | -406.3355 | -532.9472 | -532.9472 | LL |
| URY | Uruguay               | -129.8379 | -419.8751 | -400.9915 | -370.1214 | -517.4208 | -517.4208 | LL |
| UZB | Uzbekistan            | -186.3442 | -322.1371 | -298.8413 | -257.6641 | -328.785  | -328.785  | LL |
| ZMB | Zambia                | -130.4609 | -176.5468 | -302.1519 | -334.6131 | -340.0396 | -340.0396 | LL |
| CYM | Cayman Islands        | -221.3734 | -259.0723 | -249.8907 | -242.2448 | -248.4093 | -259.0723 | Q  |
| CRI | Costa Rica            | -191.1178 | -301.1858 | -261.0247 | -232.6146 | -295.076  | -301.1858 | Q  |
| CIV | Cote d'Ivoire         | -292.9623 | -413.3115 | -377.5052 | -339.006  | -407.4024 | -413.3115 | Q  |
| JOR | Jordan                | -188.6798 | -292.6486 | -257.1936 | -235.6517 | -281.7566 | -292.6486 | Q  |
| KGZ | Kyrgyzstan            | -255.8855 | -404.4822 | -354.5095 | -320.6407 | -385.5423 | -404.4822 | Q  |
| LBN | Lebanon               | 175.1033  | -346.7072 | -304.0947 | -272.5269 | -344.154  | -346.7072 | Q  |
| PAN | Panama                | -281.5108 | -430.3588 | -381.2639 | -342.1064 | -423.7495 | -430.3588 | Q  |
| PHL | Philippines           | -423.8084 | -573.5642 | -539.9027 | -511.7262 | -557.7275 | -573.5642 | Q  |
| RWA | Rwanda                | -219.716  | -371.5937 | -339.9174 | -317.9441 | -367.7955 | -371.5937 | Q  |
