# Supplementary material for: Global-scale modeling of early factors and country-specific trajectories of COVID-19 incidence: a cross-sectional study of the first 6 months of the pandemic
Source: Springer Nature journal article supplement (doi:10.1186/s12889-022-14336-w), 2022-10-14

**Additional File 4.** Analysis of the time-course of increase in COVID-19 total cases by country, using different growth-curve models. For each plot, the actual number of COVID-19 cases are shown as open circles and the fitted curve is shown in red. The y-axis refers to the proportion of daily total cases to the maximum total cases recorded in the time interval studied (0-1 scaling), and the x-axis refers to the time-course in day-month-year format. The best growth-curve model for each country was determined by minimization of the AIC.

# Best fit = quadratic

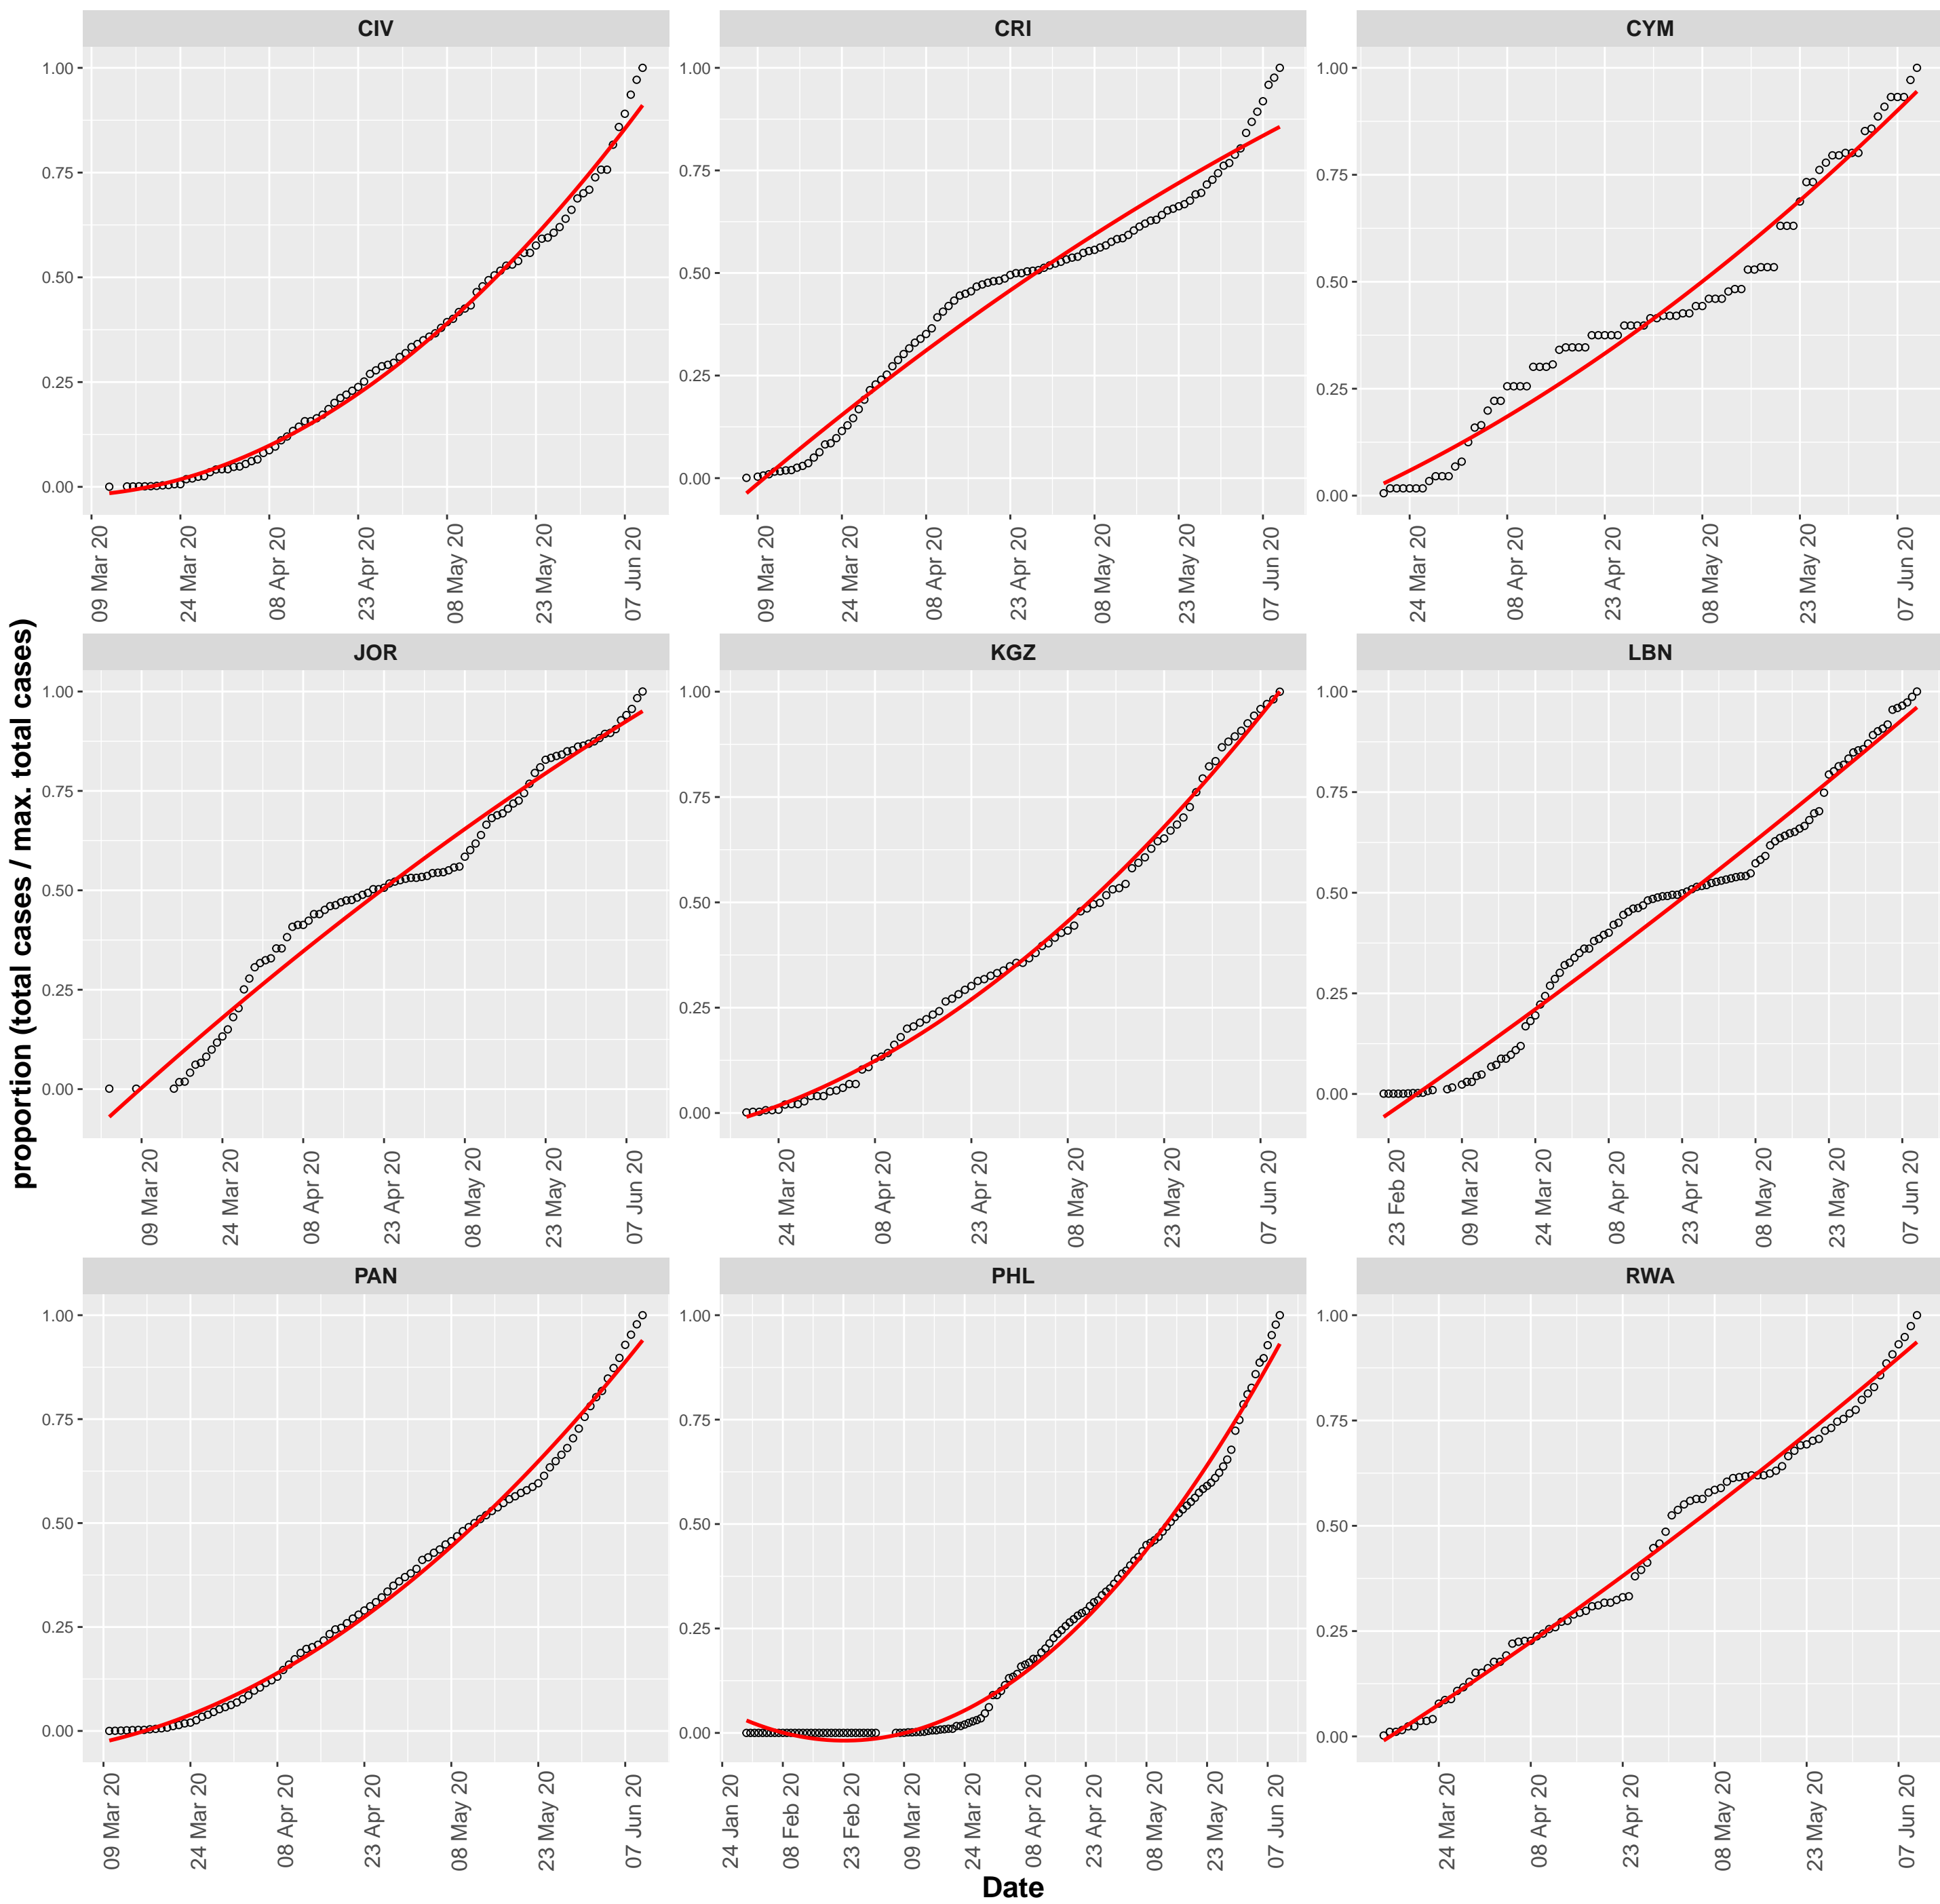

# Best fit = exponential

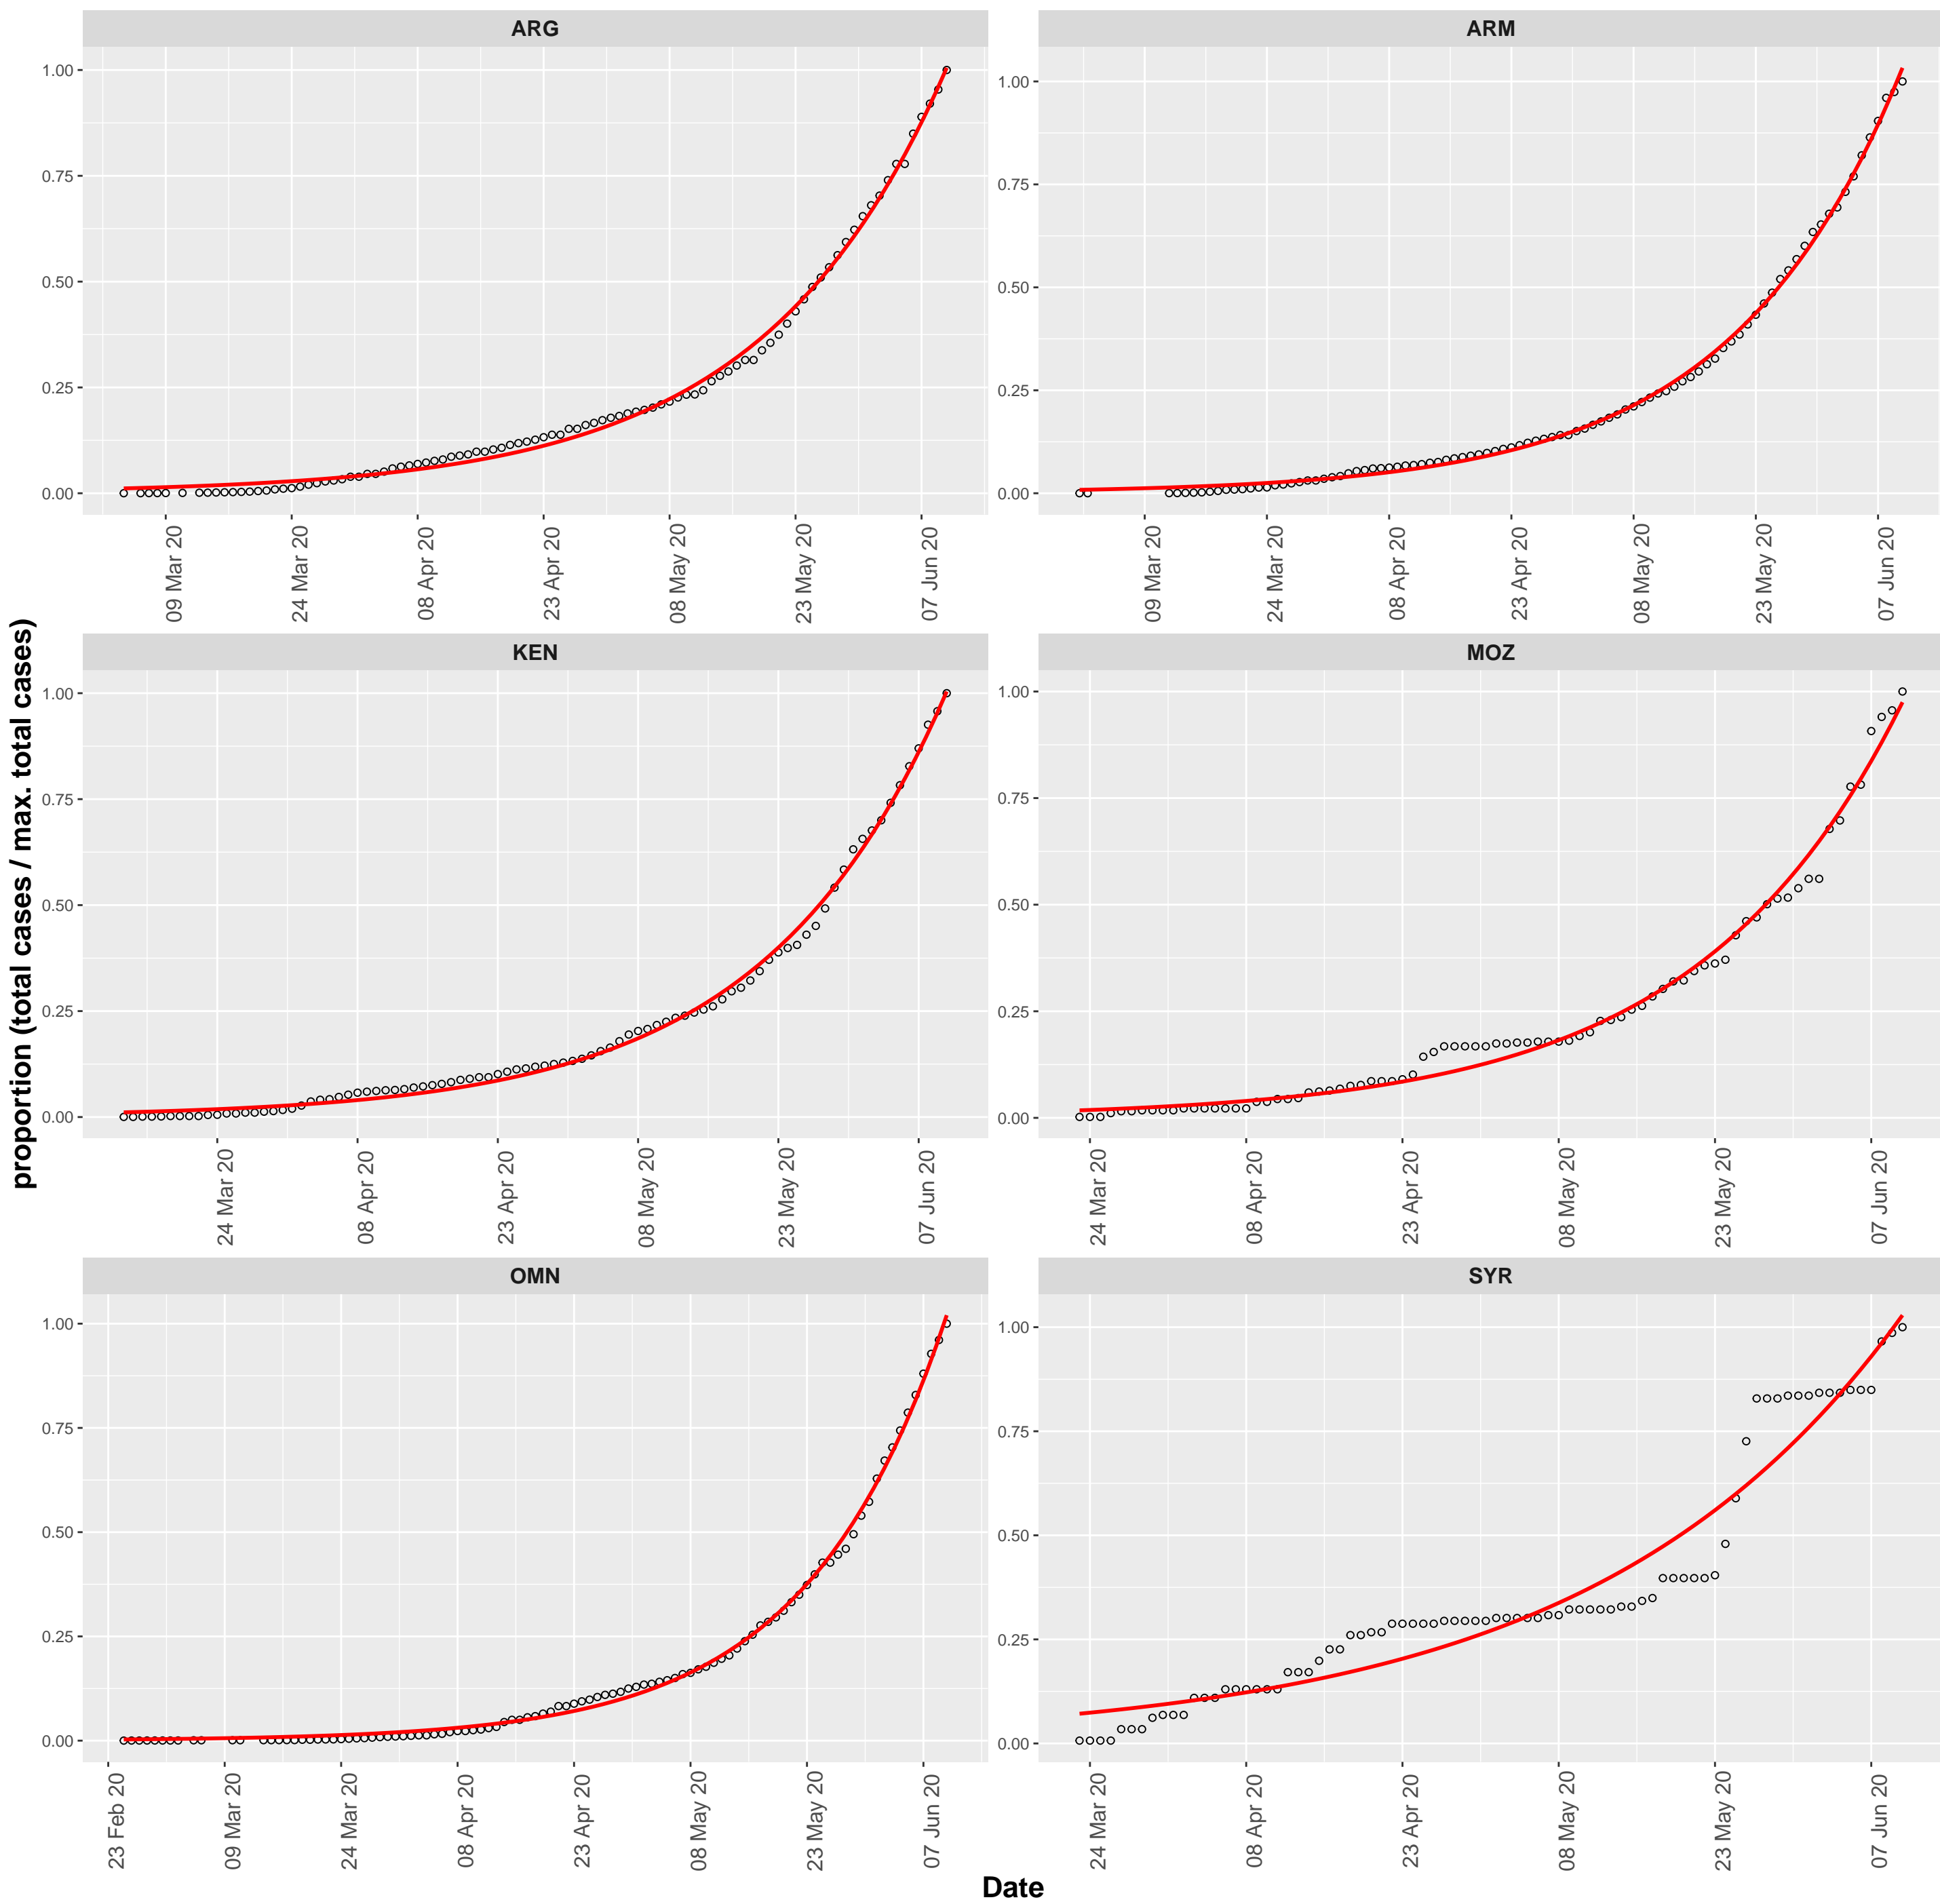

# Best fit = Gompertz

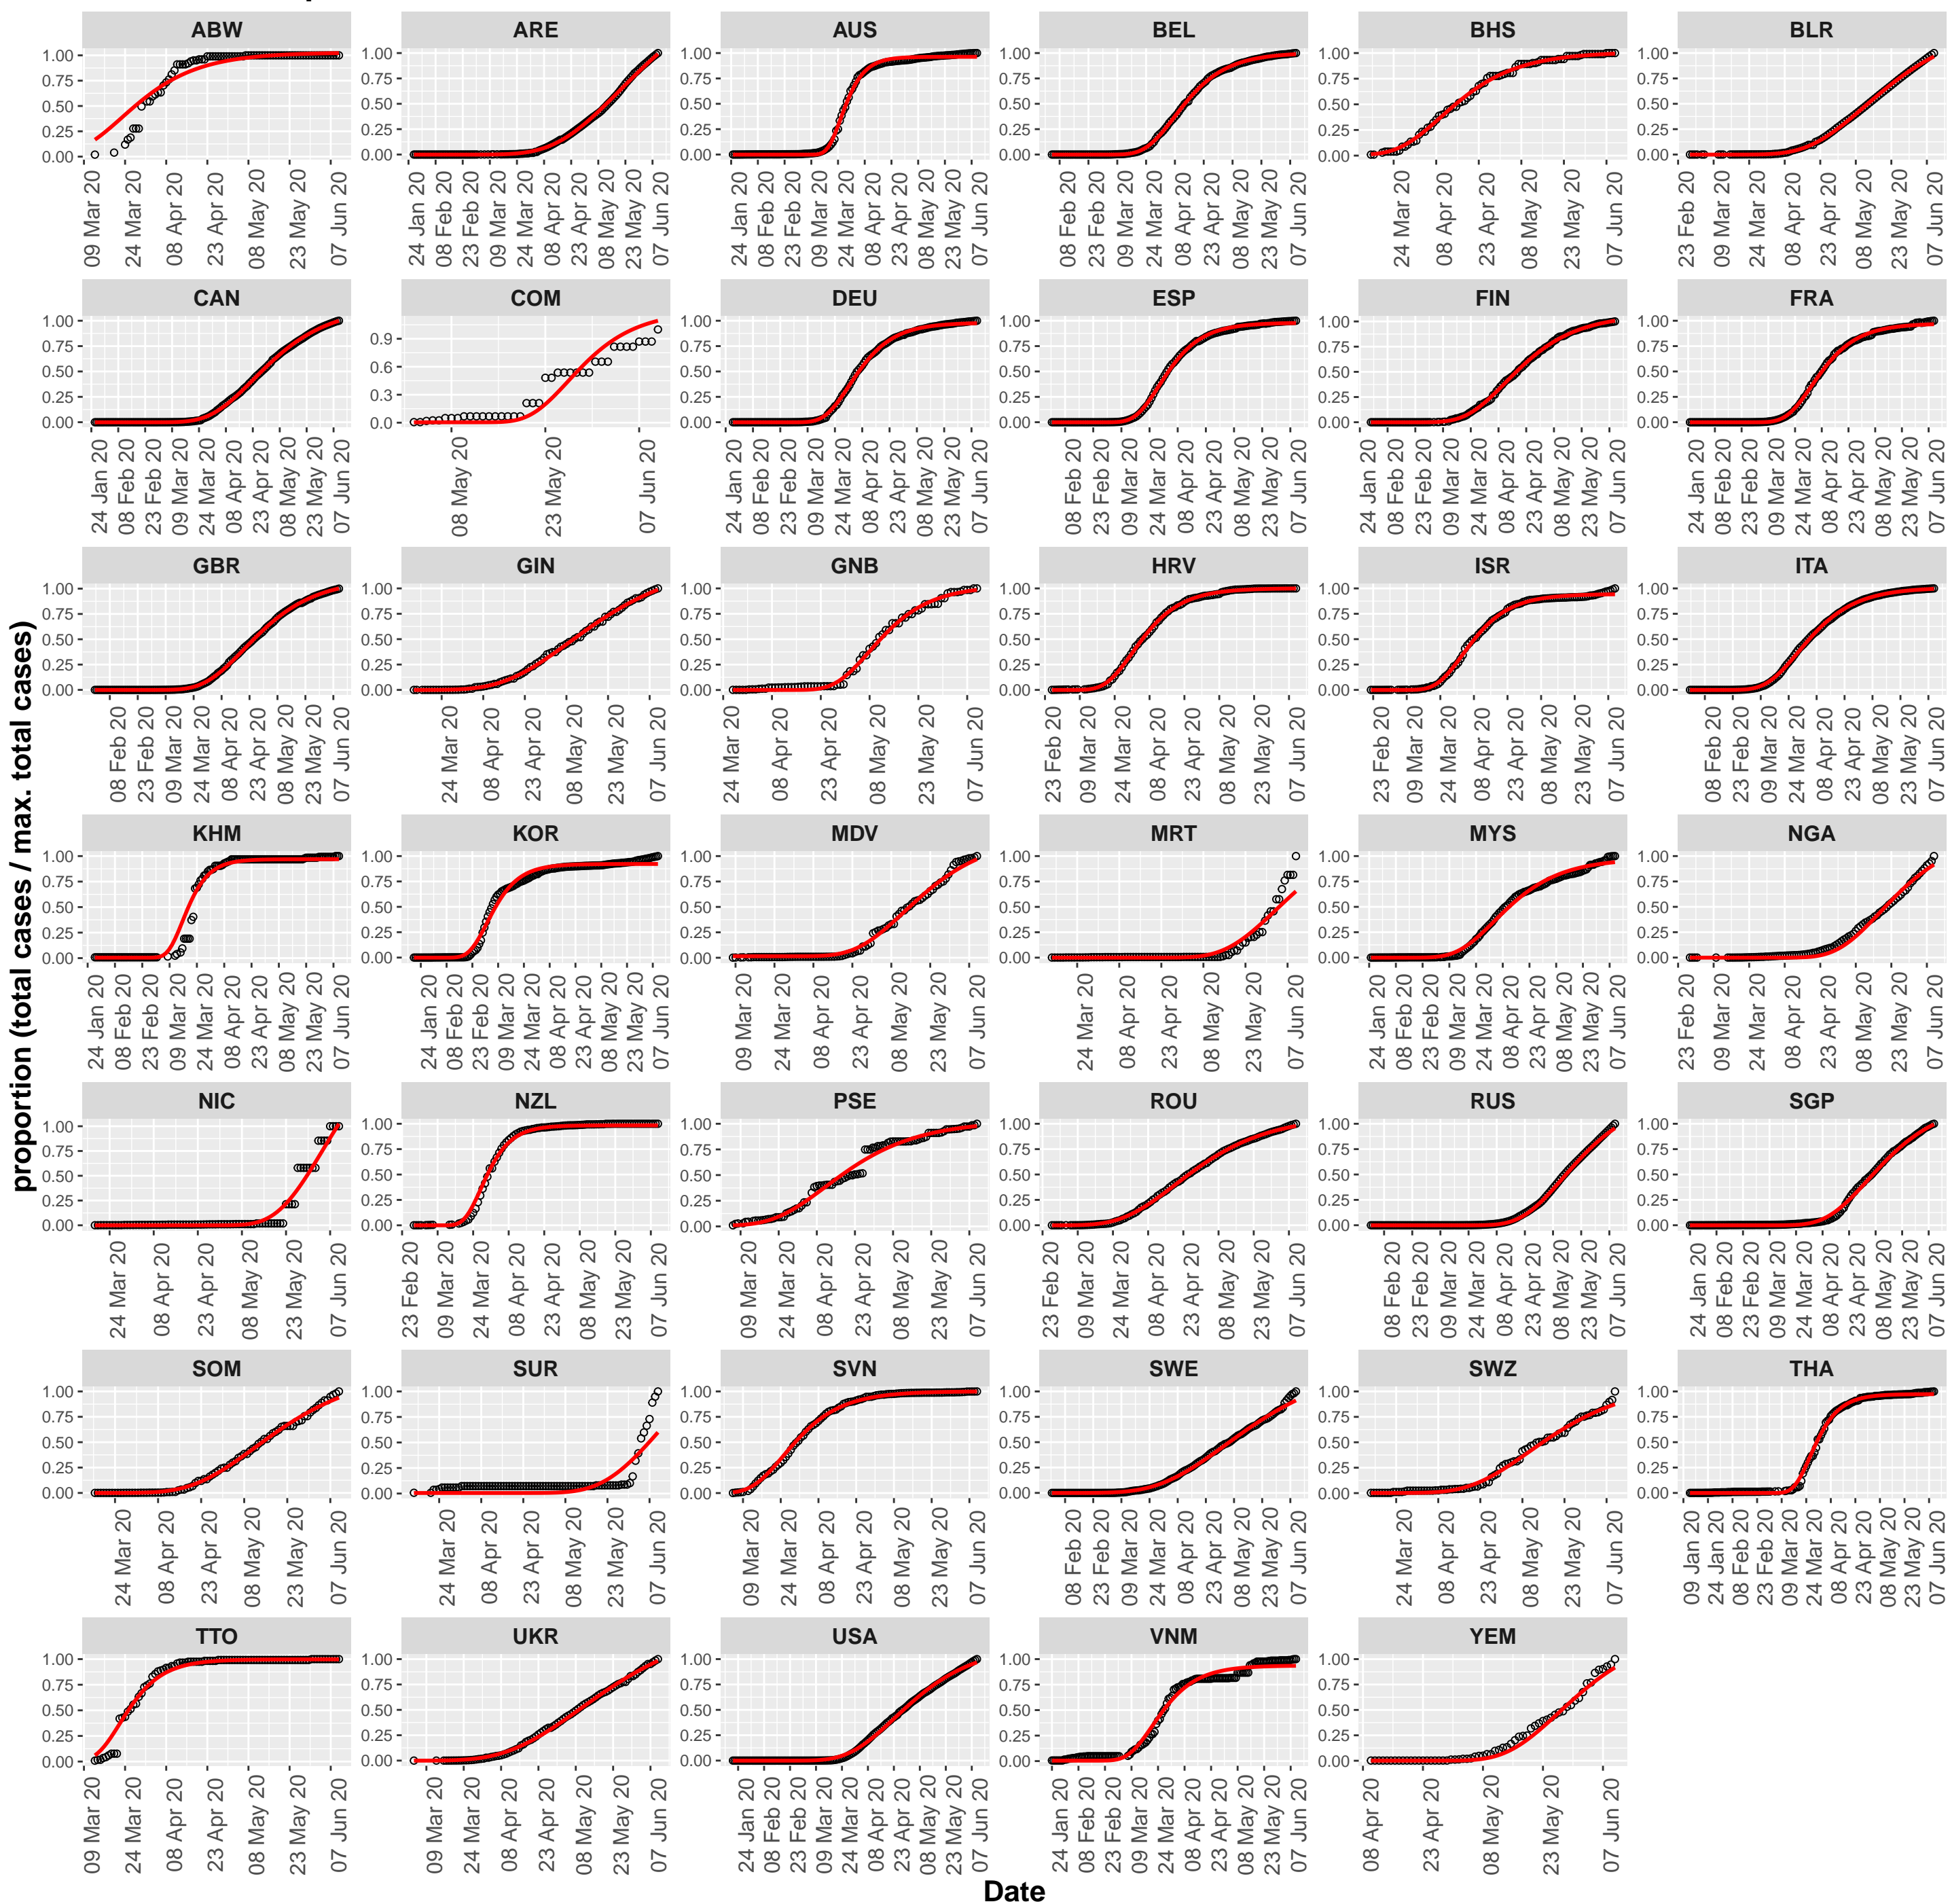

# Best fit = logistic

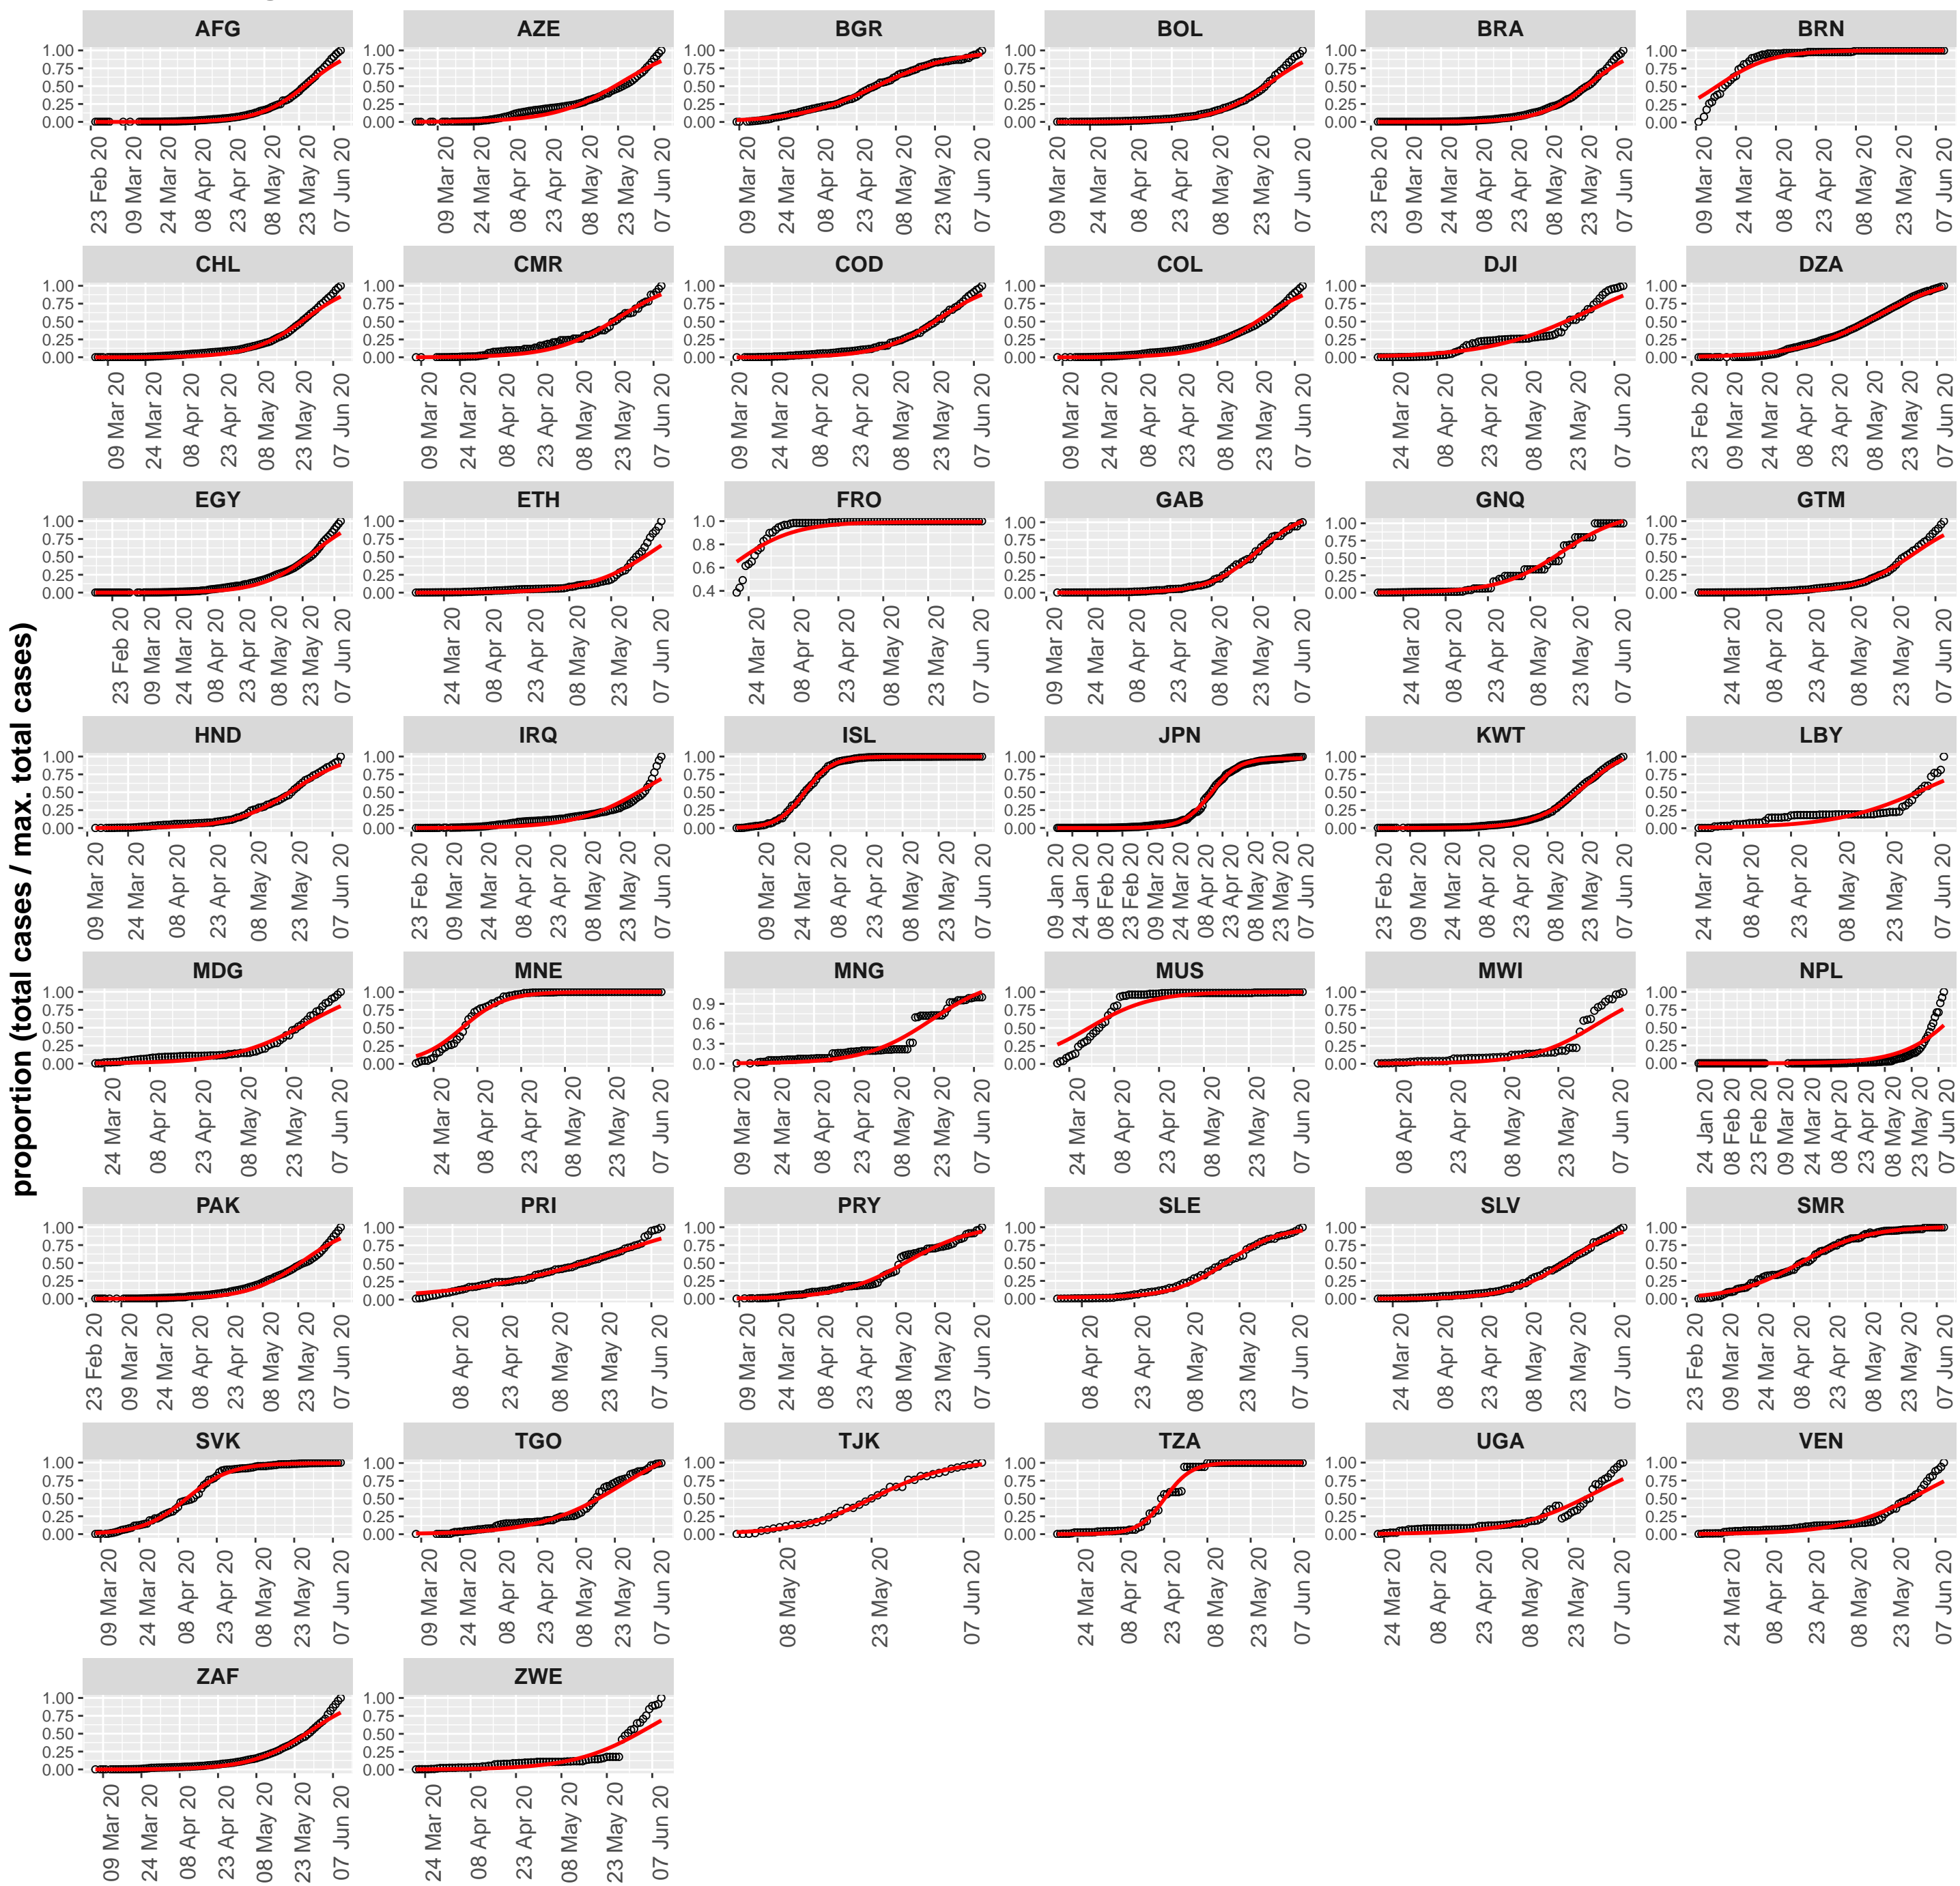

Date

# Best fit = loglogistic

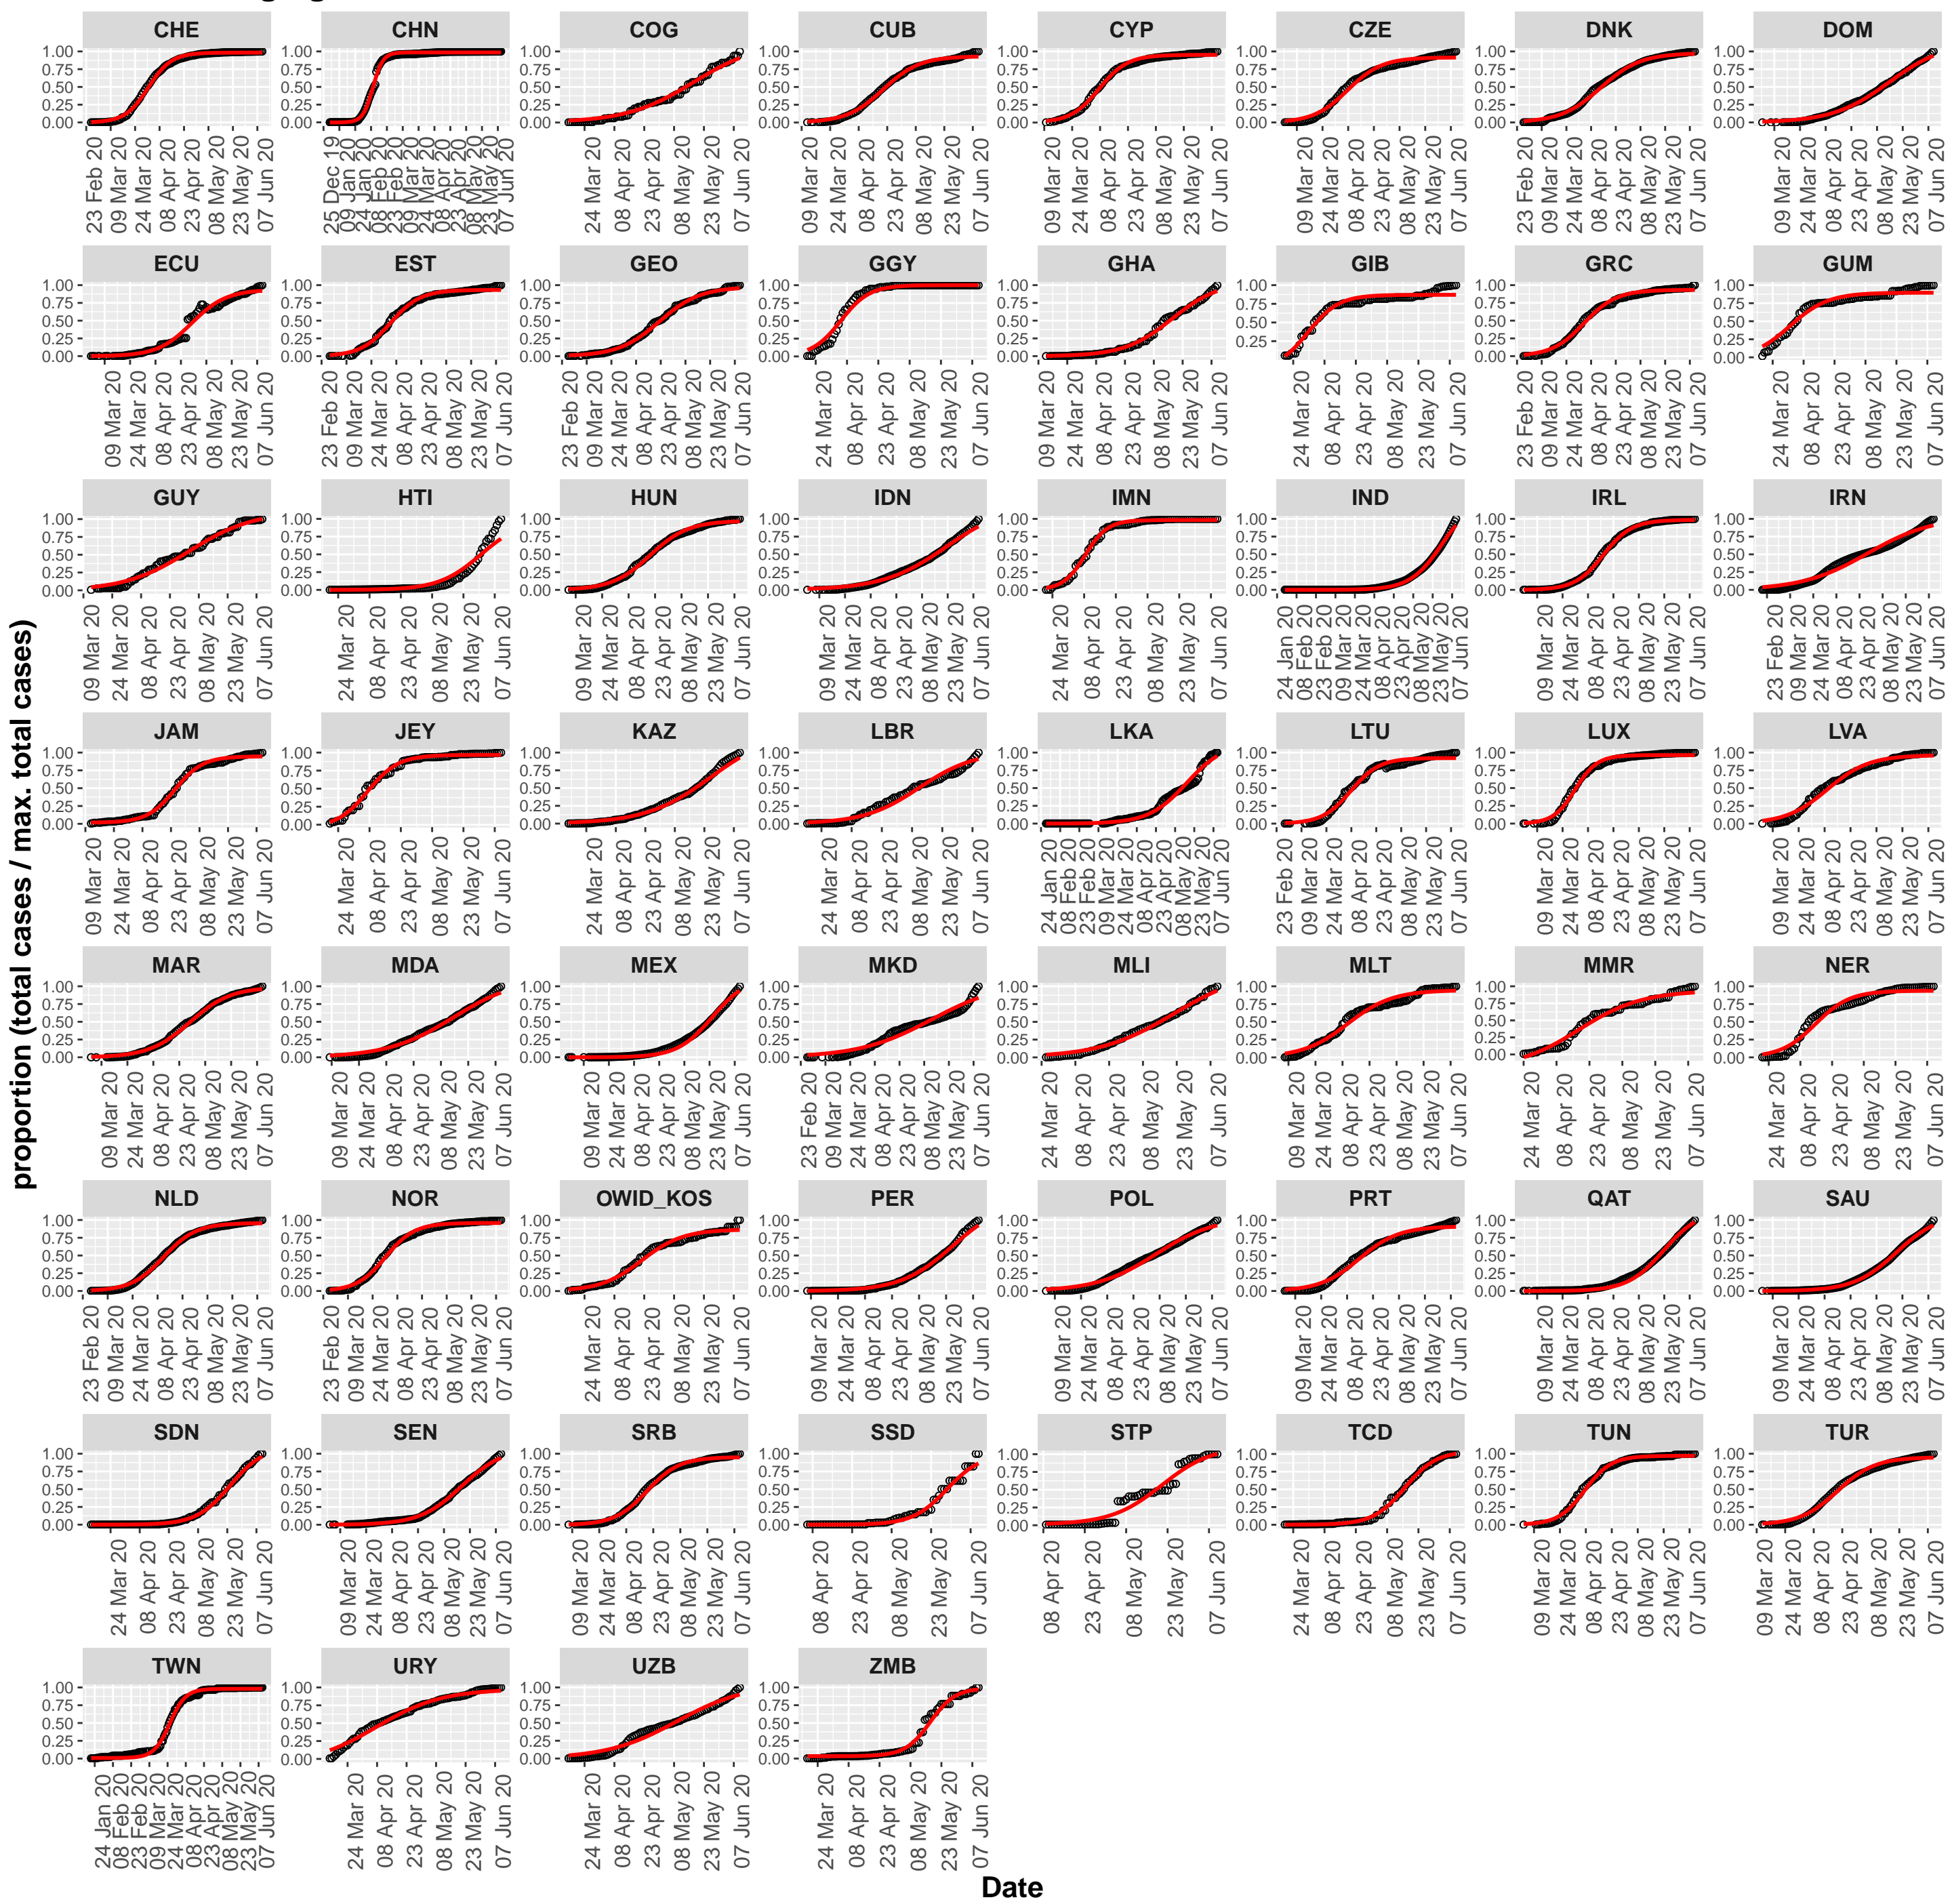

Supplement: MOESM4 [file 23604894]
